# Supplementary material
Source: publisher figshare collection journal article supplement (https://acs.figshare.com/ndownloader/files/9375670)
Supplement: Supplementary file 1 [file 9375670]

 
data_acn 
  
_audit_creation_method            'SHELXL-2014/7' 
_shelx_SHELXL_version_number      '2014/7' 
_chemical_name_systematic         ? 
_chemical_name_common             ? 
_chemical_melting_point           ? 
_chemical_formula_moiety          ? 
_chemical_formula_sum 
 'C24 H19 N O2' 
_chemical_formula_weight          353.40 
  
loop_ 
 _atom_type_symbol 
 _atom_type_description 
 _atom_type_scat_dispersion_real 
 _atom_type_scat_dispersion_imag 
 _atom_type_scat_source 
 'C'  'C'   0.0033   0.0016 
 'International Tables Vol C Tables 4.2.6.8 and 6.1.1.4' 
 'H'  'H'   0.0000   0.0000 
 'International Tables Vol C Tables 4.2.6.8 and 6.1.1.4' 
 'N'  'N'   0.0061   0.0033 
 'International Tables Vol C Tables 4.2.6.8 and 6.1.1.4' 
 'O'  'O'   0.0106   0.0060 
 'International Tables Vol C Tables 4.2.6.8 and 6.1.1.4' 
  
_space_group_crystal_system       triclinic 
_space_group_IT_number            2 
_space_group_name_H-M_alt         'P -1' 
_space_group_name_Hall            '-P 1' 
  
_shelx_space_group_comment 
; 
The symmetry employed for this shelxl refinement is uniquely defined 
by the following loop, which should always be used as a source of 
symmetry information in preference to the above space-group names. 
They are only intended as comments. 
; 
  
loop_ 
 _space_group_symop_operation_xyz 
 'x, y, z' 
 '-x, -y, -z' 
  
_cell_length_a                    8.5275(3) 
_cell_length_b                    10.4444(3) 
_cell_length_c                    11.7063(4) 
_cell_angle_alpha                 71.7186(15) 
_cell_angle_beta                  77.0693(12) 
_cell_angle_gamma                 66.7601(9) 
_cell_volume                      903.68(6) 
_cell_formula_units_Z             2 
_cell_measurement_temperature     296(2) 
_cell_measurement_reflns_used     4733 
_cell_measurement_theta_min       2.48 
_cell_measurement_theta_max       25.37 
  
_exptl_crystal_description        Block 
_exptl_crystal_colour             colourless 
_exptl_crystal_density_meas       ? 
_exptl_crystal_density_method     ? 
_exptl_crystal_density_diffrn     1.299 
_exptl_crystal_F_000              372 
_exptl_transmission_factor_min    ? 
_exptl_transmission_factor_max    ? 
_exptl_crystal_size_max           0.250 
_exptl_crystal_size_mid           0.220 
_exptl_crystal_size_min           0.120 
_exptl_absorpt_coefficient_mu     0.082 
_shelx_estimated_absorpt_T_min    0.980 
_shelx_estimated_absorpt_T_max    0.990 
_exptl_absorpt_correction_type    multi-scan 
_exptl_absorpt_correction_T_min   0.980 
_exptl_absorpt_correction_T_max   0.990 
_exptl_absorpt_process_details    'SADABS V2014/5(Bruker AXS.Inc)' 
_exptl_absorpt_special_details    ? 
_diffrn_ambient_temperature       296(2) 
_diffrn_radiation_wavelength      0.71073 
_diffrn_radiation_type            MoK\a 
_diffrn_source                    ? 
_diffrn_measurement_device_type   'Bruker APEX-II CCD' 
_diffrn_measurement_method        '\f and \w scans' 
_diffrn_detector_area_resol_mean  ? 
_diffrn_reflns_number             11421 
_diffrn_reflns_av_unetI/netI      0.0225 
_diffrn_reflns_av_R_equivalents   0.0213 
_diffrn_reflns_limit_h_min        -10 
_diffrn_reflns_limit_h_max        10 
_diffrn_reflns_limit_k_min        -12 
_diffrn_reflns_limit_k_max        12 
_diffrn_reflns_limit_l_min        -12 
_diffrn_reflns_limit_l_max        13 
_diffrn_reflns_theta_min          1.844 
_diffrn_reflns_theta_max          24.996 
_diffrn_reflns_theta_full         24.996 
_diffrn_measured_fraction_theta_max   1.000 
_diffrn_measured_fraction_theta_full  1.000 
_diffrn_reflns_Laue_measured_fraction_max    1.000 
_diffrn_reflns_Laue_measured_fraction_full   1.000 
_diffrn_reflns_point_group_measured_fraction_max   1.000 
_diffrn_reflns_point_group_measured_fraction_full  1.000 
_reflns_number_total              3187 
_reflns_number_gt                 2536 
_reflns_threshold_expression      'I > 2\s(I)' 
_reflns_Friedel_coverage          0.000 
_reflns_Friedel_fraction_max      . 
_reflns_Friedel_fraction_full     . 
  
_reflns_special_details 
; 
 Reflections were merged by SHELXL according to the crystal 
 class for the calculation of statistics and refinement. 
  
 _reflns_Friedel_fraction is defined as the number of unique 
 Friedel pairs measured divided by the number that would be 
 possible theoretically, ignoring centric projections and 
 systematic absences. 
; 
  
_computing_data_collection        'Bruker APEX2' 
_computing_cell_refinement        'Bruker SAINT' 
_computing_data_reduction         'Bruker SAINT' 
_computing_structure_solution     'SHELXS-97 (Sheldrick 2008)' 
_computing_structure_refinement   'SHELXL-2014/7 (Sheldrick, 2014)' 
_computing_molecular_graphics     'Bruker SHELXTL' 
_computing_publication_material   'Bruker SHELXTL' 
_refine_special_details           ? 
_refine_ls_structure_factor_coef  Fsqd 
_refine_ls_matrix_type            full 
_refine_ls_weighting_scheme       calc 
_refine_ls_weighting_details 
'w=1/[\s^2^(Fo^2^)+(0.0490P)^2^+0.2497P] where P=(Fo^2^+2Fc^2^)/3' 
_atom_sites_solution_primary      ? 
_atom_sites_solution_secondary    ? 
_atom_sites_solution_hydrogens    geom 
_refine_ls_hydrogen_treatment     constr 
_refine_ls_extinction_method      none 
_refine_ls_extinction_coef        . 
_refine_ls_number_reflns          3187 
_refine_ls_number_parameters      245 
_refine_ls_number_restraints      0 
_refine_ls_R_factor_all           0.0557 
_refine_ls_R_factor_gt            0.0425 
_refine_ls_wR_factor_ref          0.1121 
_refine_ls_wR_factor_gt           0.1028 
_refine_ls_goodness_of_fit_ref    1.039 
_refine_ls_restrained_S_all       1.039 
_refine_ls_shift/su_max           0.000 
_refine_ls_shift/su_mean          0.000 
  
loop_ 
 _atom_site_label 
 _atom_site_type_symbol 
 _atom_site_fract_x 
 _atom_site_fract_y 
 _atom_site_fract_z 
 _atom_site_U_iso_or_equiv 
 _atom_site_adp_type 
 _atom_site_occupancy 
 _atom_site_site_symmetry_order 
 _atom_site_calc_flag 
 _atom_site_refinement_flags_posn 
 _atom_site_refinement_flags_adp 
 _atom_site_refinement_flags_occupancy 
 _atom_site_disorder_assembly 
 _atom_site_disorder_group 
C1 C 0.7565(2) 0.28752(19) 0.68822(15) 0.0466(4) Uani 1 1 d . . . . . 
H1 H 0.7410 0.3042 0.6080 0.056 Uiso 1 1 calc R U . . . 
C2 C 0.9011(2) 0.1786(2) 0.73389(18) 0.0562(5) Uani 1 1 d . . . . . 
H2 H 0.9807 0.1218 0.6848 0.067 Uiso 1 1 calc R U . . . 
C3 C 0.9275(3) 0.1539(2) 0.85159(19) 0.0592(5) Uani 1 1 d . . . . . 
H3 H 1.0251 0.0808 0.8824 0.071 Uiso 1 1 calc R U . . . 
C4 C 0.8089(3) 0.2381(2) 0.92346(19) 0.0637(5) Uani 1 1 d . . . . . 
H4 H 0.8267 0.2222 1.0030 0.076 Uiso 1 1 calc R U . . . 
C5 C 0.6637(2) 0.3459(2) 0.87830(16) 0.0542(5) Uani 1 1 d . . . . . 
H5 H 0.5842 0.4017 0.9282 0.065 Uiso 1 1 calc R U . . . 
C6 C 0.6339(2) 0.37262(17) 0.75988(14) 0.0381(4) Uani 1 1 d . . . . . 
C7 C 0.4743(2) 0.48818(16) 0.70713(14) 0.0364(4) Uani 1 1 d . . . . . 
H7 H 0.5047 0.5135 0.6192 0.044 Uiso 1 1 calc R U . . . 
C8 C 0.4166(2) 0.62700(19) 0.74771(17) 0.0491(4) Uani 1 1 d . . . . . 
H8A H 0.3871 0.6061 0.8349 0.059 Uiso 1 1 calc R U . . . 
H8B H 0.5115 0.6621 0.7287 0.059 Uiso 1 1 calc R U . . . 
C9 C 0.2656(3) 0.7423(2) 0.68879(19) 0.0571(5) Uani 1 1 d . . . . . 
C10 C 0.1396(2) 0.69819(17) 0.65723(14) 0.0409(4) Uani 1 1 d . . . . . 
C11 C -0.0083(2) 0.8042(2) 0.60884(16) 0.0517(5) Uani 1 1 d . . . . . 
H11 H -0.0237 0.9008 0.5952 0.062 Uiso 1 1 calc R U . . . 
C12 C -0.1305(2) 0.7677(2) 0.58128(16) 0.0551(5) Uani 1 1 d . . . . . 
H12 H -0.2274 0.8389 0.5481 0.066 Uiso 1 1 calc R U . . . 
C13 C -0.1086(2) 0.6245(2) 0.60308(15) 0.0522(5) Uani 1 1 d . . . . . 
H13 H -0.1916 0.5992 0.5851 0.063 Uiso 1 1 calc R U . . . 
C14 C 0.0357(2) 0.51847(19) 0.65147(14) 0.0436(4) Uani 1 1 d . . . . . 
H14 H 0.0480 0.4223 0.6666 0.052 Uiso 1 1 calc R U . . . 
C15 C 0.1630(2) 0.55297(17) 0.67803(13) 0.0352(4) Uani 1 1 d . . . . . 
C16 C 0.32198(19) 0.43306(16) 0.72977(13) 0.0337(4) Uani 1 1 d . . . . . 
C17 C 0.3815(2) 0.31076(17) 0.66547(14) 0.0371(4) Uani 1 1 d . . . . . 
C18 C 0.3209(2) 0.21218(18) 0.86625(15) 0.0415(4) Uani 1 1 d . . . . . 
C19 C 0.2950(2) 0.1154(2) 0.97361(18) 0.0589(5) Uani 1 1 d . . . . . 
H19 H 0.3214 0.0191 0.9769 0.071 Uiso 1 1 calc R U . . . 
C20 C 0.2282(3) 0.1670(3) 1.07610(18) 0.0686(6) Uani 1 1 d . . . . . 
H20 H 0.2088 0.1043 1.1496 0.082 Uiso 1 1 calc R U . . . 
C21 C 0.1899(3) 0.3088(3) 1.07164(17) 0.0643(6) Uani 1 1 d . . . . . 
H21 H 0.1467 0.3405 1.1421 0.077 Uiso 1 1 calc R U . . . 
C22 C 0.2149(2) 0.4052(2) 0.96314(15) 0.0498(5) Uani 1 1 d . . . . . 
H22 H 0.1868 0.5017 0.9601 0.060 Uiso 1 1 calc R U . . . 
C23 C 0.28196(19) 0.35629(17) 0.85982(13) 0.0369(4) Uani 1 1 d . . . . . 
C24 C 0.4335(3) 0.0503(2) 0.7208(2) 0.0709(6) Uani 1 1 d . . . . . 
H24A H 0.3332 0.0291 0.7223 0.106 Uiso 1 1 calc R U . . . 
H24B H 0.5050 -0.0242 0.7791 0.106 Uiso 1 1 calc R U . . . 
H24C H 0.4964 0.0555 0.6415 0.106 Uiso 1 1 calc R U . . . 
N1 N 0.38193(18) 0.18752(14) 0.75040(13) 0.0437(4) Uani 1 1 d . . . . . 
O1 O 0.2453(2) 0.86799(16) 0.6697(2) 0.1177(8) Uani 1 1 d . . . . . 
O2 O 0.42357(16) 0.32132(13) 0.55764(10) 0.0508(3) Uani 1 1 d . . . . . 
  
loop_ 
 _atom_site_aniso_label 
 _atom_site_aniso_U_11 
 _atom_site_aniso_U_22 
 _atom_site_aniso_U_33 
 _atom_site_aniso_U_23 
 _atom_site_aniso_U_13 
 _atom_site_aniso_U_12 
C1 0.0435(10) 0.0528(11) 0.0442(9) -0.0146(8) -0.0035(8) -0.0166(9) 
C2 0.0435(11) 0.0527(11) 0.0674(12) -0.0190(9) -0.0015(9) -0.0112(9) 
C3 0.0458(11) 0.0536(12) 0.0727(13) -0.0071(10) -0.0189(10) -0.0121(9) 
C4 0.0616(13) 0.0730(14) 0.0560(12) -0.0148(10) -0.0229(10) -0.0154(11) 
C5 0.0496(11) 0.0636(12) 0.0505(10) -0.0232(9) -0.0116(9) -0.0111(10) 
C6 0.0358(9) 0.0415(9) 0.0427(9) -0.0123(7) -0.0030(7) -0.0190(7) 
C7 0.0382(9) 0.0387(9) 0.0367(8) -0.0113(7) -0.0033(7) -0.0173(7) 
C8 0.0476(10) 0.0464(10) 0.0649(11) -0.0227(9) -0.0081(9) -0.0209(9) 
C9 0.0567(12) 0.0365(10) 0.0833(14) -0.0214(9) -0.0122(10) -0.0146(9) 
C10 0.0438(10) 0.0378(9) 0.0386(8) -0.0097(7) -0.0030(7) -0.0127(8) 
C11 0.0552(12) 0.0409(10) 0.0467(10) -0.0077(8) -0.0052(9) -0.0070(9) 
C12 0.0460(11) 0.0616(13) 0.0426(10) -0.0097(9) -0.0130(8) -0.0017(9) 
C13 0.0429(10) 0.0698(13) 0.0465(10) -0.0202(9) -0.0103(8) -0.0155(10) 
C14 0.0437(10) 0.0494(10) 0.0419(9) -0.0135(8) -0.0074(7) -0.0177(8) 
C15 0.0380(9) 0.0385(9) 0.0289(7) -0.0097(6) -0.0020(6) -0.0133(7) 
C16 0.0378(9) 0.0340(8) 0.0328(8) -0.0097(6) -0.0046(6) -0.0148(7) 
C17 0.0352(9) 0.0400(9) 0.0417(9) -0.0143(7) -0.0074(7) -0.0141(7) 
C18 0.0354(9) 0.0432(10) 0.0462(9) -0.0031(7) -0.0115(7) -0.0167(8) 
C19 0.0550(12) 0.0502(11) 0.0657(13) 0.0104(10) -0.0205(10) -0.0244(10) 
C20 0.0577(13) 0.0878(17) 0.0436(11) 0.0144(11) -0.0094(9) -0.0301(12) 
C21 0.0534(12) 0.0903(17) 0.0378(10) -0.0072(10) -0.0019(8) -0.0220(12) 
C22 0.0453(10) 0.0615(12) 0.0379(9) -0.0127(8) -0.0026(8) -0.0148(9) 
C23 0.0318(8) 0.0432(9) 0.0363(8) -0.0072(7) -0.0062(6) -0.0146(7) 
C24 0.0880(16) 0.0398(11) 0.0929(16) -0.0232(11) -0.0319(13) -0.0140(11) 
N1 0.0493(9) 0.0328(8) 0.0541(8) -0.0111(6) -0.0140(7) -0.0149(6) 
O1 0.0976(13) 0.0385(9) 0.235(2) -0.0362(11) -0.0683(14) -0.0146(9) 
O2 0.0592(8) 0.0577(8) 0.0425(7) -0.0229(6) -0.0040(6) -0.0207(6) 
  
_geom_special_details 
; 
 All esds (except the esd in the dihedral angle between two l.s. planes) 
 are estimated using the full covariance matrix.  The cell esds are taken 
 into account individually in the estimation of esds in distances, angles 
 and torsion angles; correlations between esds in cell parameters are only 
 used when they are defined by crystal symmetry.  An approximate (isotropic) 
 treatment of cell esds is used for estimating esds involving l.s. planes. 
; 
  
loop_ 
 _geom_bond_atom_site_label_1 
 _geom_bond_atom_site_label_2 
 _geom_bond_distance 
 _geom_bond_site_symmetry_2 
 _geom_bond_publ_flag 
C1 C2 1.381(2) . ? 
C1 C6 1.389(2) . ? 
C1 H1 0.9300 . ? 
C2 C3 1.373(3) . ? 
C2 H2 0.9300 . ? 
C3 C4 1.373(3) . ? 
C3 H3 0.9300 . ? 
C4 C5 1.379(3) . ? 
C4 H4 0.9300 . ? 
C5 C6 1.387(2) . ? 
C5 H5 0.9300 . ? 
C6 C7 1.517(2) . ? 
C7 C8 1.528(2) . ? 
C7 C16 1.559(2) . ? 
C7 H7 0.9800 . ? 
C8 C9 1.496(3) . ? 
C8 H8A 0.9700 . ? 
C8 H8B 0.9700 . ? 
C9 O1 1.207(2) . ? 
C9 C10 1.476(3) . ? 
C10 C15 1.397(2) . ? 
C10 C11 1.400(2) . ? 
C11 C12 1.370(3) . ? 
C11 H11 0.9300 . ? 
C12 C13 1.377(3) . ? 
C12 H12 0.9300 . ? 
C13 C14 1.380(2) . ? 
C13 H13 0.9300 . ? 
C14 C15 1.391(2) . ? 
C14 H14 0.9300 . ? 
C15 C16 1.525(2) . ? 
C16 C23 1.515(2) . ? 
C16 C17 1.542(2) . ? 
C17 O2 1.2147(18) . ? 
C17 N1 1.356(2) . ? 
C18 C19 1.380(2) . ? 
C18 C23 1.388(2) . ? 
C18 N1 1.405(2) . ? 
C19 C20 1.383(3) . ? 
C19 H19 0.9300 . ? 
C20 C21 1.371(3) . ? 
C20 H20 0.9300 . ? 
C21 C22 1.385(3) . ? 
C21 H21 0.9300 . ? 
C22 C23 1.378(2) . ? 
C22 H22 0.9300 . ? 
C24 N1 1.454(2) . ? 
C24 H24A 0.9600 . ? 
C24 H24B 0.9600 . ? 
C24 H24C 0.9600 . ? 
  
loop_ 
 _geom_angle_atom_site_label_1 
 _geom_angle_atom_site_label_2 
 _geom_angle_atom_site_label_3 
 _geom_angle 
 _geom_angle_site_symmetry_1 
 _geom_angle_site_symmetry_3 
 _geom_angle_publ_flag 
C2 C1 C6 121.22(16) . . ? 
C2 C1 H1 119.4 . . ? 
C6 C1 H1 119.4 . . ? 
C3 C2 C1 120.19(18) . . ? 
C3 C2 H2 119.9 . . ? 
C1 C2 H2 119.9 . . ? 
C4 C3 C2 119.48(18) . . ? 
C4 C3 H3 120.3 . . ? 
C2 C3 H3 120.3 . . ? 
C3 C4 C5 120.36(18) . . ? 
C3 C4 H4 119.8 . . ? 
C5 C4 H4 119.8 . . ? 
C4 C5 C6 121.22(18) . . ? 
C4 C5 H5 119.4 . . ? 
C6 C5 H5 119.4 . . ? 
C5 C6 C1 117.50(16) . . ? 
C5 C6 C7 123.01(15) . . ? 
C1 C6 C7 119.48(14) . . ? 
C6 C7 C8 113.81(13) . . ? 
C6 C7 C16 112.63(12) . . ? 
C8 C7 C16 110.49(13) . . ? 
C6 C7 H7 106.5 . . ? 
C8 C7 H7 106.5 . . ? 
C16 C7 H7 106.5 . . ? 
C9 C8 C7 112.81(14) . . ? 
C9 C8 H8A 109.0 . . ? 
C7 C8 H8A 109.0 . . ? 
C9 C8 H8B 109.0 . . ? 
C7 C8 H8B 109.0 . . ? 
H8A C8 H8B 107.8 . . ? 
O1 C9 C10 120.86(19) . . ? 
O1 C9 C8 121.01(18) . . ? 
C10 C9 C8 118.12(15) . . ? 
C15 C10 C11 119.62(16) . . ? 
C15 C10 C9 121.17(15) . . ? 
C11 C10 C9 119.18(16) . . ? 
C12 C11 C10 120.98(17) . . ? 
C12 C11 H11 119.5 . . ? 
C10 C11 H11 119.5 . . ? 
C11 C12 C13 119.48(17) . . ? 
C11 C12 H12 120.3 . . ? 
C13 C12 H12 120.3 . . ? 
C12 C13 C14 120.39(17) . . ? 
C12 C13 H13 119.8 . . ? 
C14 C13 H13 119.8 . . ? 
C13 C14 C15 121.14(17) . . ? 
C13 C14 H14 119.4 . . ? 
C15 C14 H14 119.4 . . ? 
C14 C15 C10 118.37(15) . . ? 
C14 C15 C16 119.76(14) . . ? 
C10 C15 C16 121.86(14) . . ? 
C23 C16 C15 112.08(12) . . ? 
C23 C16 C17 101.70(12) . . ? 
C15 C16 C17 109.66(12) . . ? 
C23 C16 C7 114.86(12) . . ? 
C15 C16 C7 111.09(12) . . ? 
C17 C16 C7 106.82(12) . . ? 
O2 C17 N1 125.42(15) . . ? 
O2 C17 C16 126.29(14) . . ? 
N1 C17 C16 108.28(13) . . ? 
C19 C18 C23 121.96(17) . . ? 
C19 C18 N1 128.30(17) . . ? 
C23 C18 N1 109.71(14) . . ? 
C18 C19 C20 117.48(19) . . ? 
C18 C19 H19 121.3 . . ? 
C20 C19 H19 121.3 . . ? 
C21 C20 C19 121.38(18) . . ? 
C21 C20 H20 119.3 . . ? 
C19 C20 H20 119.3 . . ? 
C20 C21 C22 120.59(19) . . ? 
C20 C21 H21 119.7 . . ? 
C22 C21 H21 119.7 . . ? 
C23 C22 C21 119.14(19) . . ? 
C23 C22 H22 120.4 . . ? 
C21 C22 H22 120.4 . . ? 
C22 C23 C18 119.43(15) . . ? 
C22 C23 C16 131.81(15) . . ? 
C18 C23 C16 108.74(13) . . ? 
N1 C24 H24A 109.5 . . ? 
N1 C24 H24B 109.5 . . ? 
H24A C24 H24B 109.5 . . ? 
N1 C24 H24C 109.5 . . ? 
H24A C24 H24C 109.5 . . ? 
H24B C24 H24C 109.5 . . ? 
C17 N1 C18 111.47(13) . . ? 
C17 N1 C24 122.75(15) . . ? 
C18 N1 C24 125.74(15) . . ? 
  
loop_ 
 _geom_torsion_atom_site_label_1 
 _geom_torsion_atom_site_label_2 
 _geom_torsion_atom_site_label_3 
 _geom_torsion_atom_site_label_4 
 _geom_torsion 
 _geom_torsion_site_symmetry_1 
 _geom_torsion_site_symmetry_2 
 _geom_torsion_site_symmetry_3 
 _geom_torsion_site_symmetry_4 
 _geom_torsion_publ_flag 
C6 C1 C2 C3 -1.1(3) . . . . ? 
C1 C2 C3 C4 0.2(3) . . . . ? 
C2 C3 C4 C5 0.5(3) . . . . ? 
C3 C4 C5 C6 -0.3(3) . . . . ? 
C4 C5 C6 C1 -0.5(3) . . . . ? 
C4 C5 C6 C7 178.81(17) . . . . ? 
C2 C1 C6 C5 1.2(2) . . . . ? 
C2 C1 C6 C7 -178.16(15) . . . . ? 
C5 C6 C7 C8 39.3(2) . . . . ? 
C1 C6 C7 C8 -141.34(15) . . . . ? 
C5 C6 C7 C16 -87.44(19) . . . . ? 
C1 C6 C7 C16 91.90(17) . . . . ? 
C6 C7 C8 C9 176.55(14) . . . . ? 
C16 C7 C8 C9 -55.58(19) . . . . ? 
C7 C8 C9 O1 -149.9(2) . . . . ? 
C7 C8 C9 C10 31.6(2) . . . . ? 
O1 C9 C10 C15 179.4(2) . . . . ? 
C8 C9 C10 C15 -2.0(3) . . . . ? 
O1 C9 C10 C11 -2.4(3) . . . . ? 
C8 C9 C10 C11 176.11(16) . . . . ? 
C15 C10 C11 C12 -0.1(2) . . . . ? 
C9 C10 C11 C12 -178.30(16) . . . . ? 
C10 C11 C12 C13 0.9(3) . . . . ? 
C11 C12 C13 C14 -0.5(3) . . . . ? 
C12 C13 C14 C15 -0.7(3) . . . . ? 
C13 C14 C15 C10 1.5(2) . . . . ? 
C13 C14 C15 C16 -179.14(14) . . . . ? 
C11 C10 C15 C14 -1.1(2) . . . . ? 
C9 C10 C15 C14 177.07(15) . . . . ? 
C11 C10 C15 C16 179.60(14) . . . . ? 
C9 C10 C15 C16 -2.3(2) . . . . ? 
C14 C15 C16 C23 -71.73(17) . . . . ? 
C10 C15 C16 C23 107.61(16) . . . . ? 
C14 C15 C16 C17 40.44(18) . . . . ? 
C10 C15 C16 C17 -140.22(14) . . . . ? 
C14 C15 C16 C7 158.28(13) . . . . ? 
C10 C15 C16 C7 -22.38(19) . . . . ? 
C6 C7 C16 C23 50.20(17) . . . . ? 
C8 C7 C16 C23 -78.32(17) . . . . ? 
C6 C7 C16 C15 178.72(12) . . . . ? 
C8 C7 C16 C15 50.20(16) . . . . ? 
C6 C7 C16 C17 -61.73(16) . . . . ? 
C8 C7 C16 C17 169.75(13) . . . . ? 
C23 C16 C17 O2 177.96(15) . . . . ? 
C15 C16 C17 O2 59.2(2) . . . . ? 
C7 C16 C17 O2 -61.3(2) . . . . ? 
C23 C16 C17 N1 -3.12(15) . . . . ? 
C15 C16 C17 N1 -121.91(14) . . . . ? 
C7 C16 C17 N1 117.62(13) . . . . ? 
C23 C18 C19 C20 -0.1(3) . . . . ? 
N1 C18 C19 C20 -177.99(17) . . . . ? 
C18 C19 C20 C21 -0.3(3) . . . . ? 
C19 C20 C21 C22 1.0(3) . . . . ? 
C20 C21 C22 C23 -1.2(3) . . . . ? 
C21 C22 C23 C18 0.8(2) . . . . ? 
C21 C22 C23 C16 179.21(16) . . . . ? 
C19 C18 C23 C22 -0.2(2) . . . . ? 
N1 C18 C23 C22 178.09(14) . . . . ? 
C19 C18 C23 C16 -178.92(15) . . . . ? 
N1 C18 C23 C16 -0.66(18) . . . . ? 
C15 C16 C23 C22 -59.3(2) . . . . ? 
C17 C16 C23 C22 -176.31(17) . . . . ? 
C7 C16 C23 C22 68.8(2) . . . . ? 
C15 C16 C23 C18 119.28(14) . . . . ? 
C17 C16 C23 C18 2.23(16) . . . . ? 
C7 C16 C23 C18 -112.70(15) . . . . ? 
O2 C17 N1 C18 -178.10(15) . . . . ? 
C16 C17 N1 C18 2.97(17) . . . . ? 
O2 C17 N1 C24 -0.4(3) . . . . ? 
C16 C17 N1 C24 -179.31(16) . . . . ? 
C19 C18 N1 C17 176.60(16) . . . . ? 
C23 C18 N1 C17 -1.51(18) . . . . ? 
C19 C18 N1 C24 -1.0(3) . . . . ? 
C23 C18 N1 C24 -179.15(16) . . . . ? 
  
_refine_diff_density_max    0.233 
_refine_diff_density_min   -0.255 
_refine_diff_density_rms    0.035 
  
_shelx_res_file 
; 
  
    acn.res created by SHELXL-2014/7 
  
TITL acn in P-1 
CELL 0.71073   8.52752  10.44444  11.70627  71.7186  77.0693  66.7601 
ZERR   2.00   0.00032   0.00032   0.00044   0.0015   0.0012   0.0009 
LATT 1 
SFAC C  H  N  O 
UNIT 48  38  2  4 
OMIT -3 50 
L.S. 8 
ACTA 
BOND $H 
FMAP 2 
PLAN 5 
SIZE 0.12 0.22 0.25 
CONF 
TEMP 23.000 
WGHT    0.049000    0.249700 
FVAR       0.30301 
MOLE 1 
C1    1    0.756524    0.287516    0.688220    11.00000    0.04350    0.05278 = 
         0.04424   -0.01459   -0.00346   -0.01661 
AFIX  43 
H1    2    0.740989    0.304216    0.607982    11.00000   -1.20000 
AFIX   0 
C2    1    0.901070    0.178590    0.733892    11.00000    0.04349    0.05266 = 
         0.06741   -0.01901   -0.00150   -0.01117 
AFIX  43 
H2    2    0.980741    0.121767    0.684814    11.00000   -1.20000 
AFIX   0 
C3    1    0.927545    0.153907    0.851587    11.00000    0.04584    0.05356 = 
         0.07266   -0.00712   -0.01893   -0.01206 
AFIX  43 
H3    2    1.025053    0.080761    0.882360    11.00000   -1.20000 
AFIX   0 
C4    1    0.808947    0.238052    0.923456    11.00000    0.06156    0.07304 = 
         0.05598   -0.01482   -0.02291   -0.01539 
AFIX  43 
H4    2    0.826684    0.222227    1.003041    11.00000   -1.20000 
AFIX   0 
C5    1    0.663701    0.345880    0.878301    11.00000    0.04964    0.06358 = 
         0.05050   -0.02322   -0.01161   -0.01105 
AFIX  43 
H5    2    0.584246    0.401724    0.928178    11.00000   -1.20000 
AFIX   0 
C6    1    0.633882    0.372616    0.759884    11.00000    0.03581    0.04153 = 
         0.04274   -0.01228   -0.00298   -0.01902 
C7    1    0.474342    0.488183    0.707134    11.00000    0.03822    0.03870 = 
         0.03672   -0.01127   -0.00331   -0.01731 
AFIX  13 
H7    2    0.504650    0.513505    0.619202    11.00000   -1.20000 
AFIX   0 
C8    1    0.416640    0.627002    0.747705    11.00000    0.04762    0.04643 = 
         0.06488   -0.02273   -0.00813   -0.02093 
AFIX  23 
H8A   2    0.387065    0.606133    0.834867    11.00000   -1.20000 
H8B   2    0.511517    0.662114    0.728658    11.00000   -1.20000 
AFIX   0 
C9    1    0.265582    0.742286    0.688786    11.00000    0.05674    0.03651 = 
         0.08328   -0.02143   -0.01224   -0.01463 
C10   1    0.139611    0.698193    0.657232    11.00000    0.04385    0.03782 = 
         0.03860   -0.00973   -0.00304   -0.01267 
C11   1   -0.008253    0.804203    0.608842    11.00000    0.05518    0.04093 = 
         0.04670   -0.00766   -0.00524   -0.00703 
AFIX  43 
H11   2   -0.023733    0.900842    0.595214    11.00000   -1.20000 
AFIX   0 
C12   1   -0.130466    0.767658    0.581276    11.00000    0.04597    0.06157 = 
         0.04262   -0.00970   -0.01302   -0.00172 
AFIX  43 
H12   2   -0.227390    0.838947    0.548105    11.00000   -1.20000 
AFIX   0 
C13   1   -0.108644    0.624520    0.603075    11.00000    0.04290    0.06982 = 
         0.04645   -0.02015   -0.01029   -0.01549 
AFIX  43 
H13   2   -0.191642    0.599179    0.585080    11.00000   -1.20000 
AFIX   0 
C14   1    0.035689    0.518466    0.651473    11.00000    0.04371    0.04943 = 
         0.04193   -0.01354   -0.00738   -0.01769 
AFIX  43 
H14   2    0.048040    0.422283    0.666587    11.00000   -1.20000 
AFIX   0 
C15   1    0.162981    0.552971    0.678029    11.00000    0.03804    0.03849 = 
         0.02885   -0.00967   -0.00201   -0.01334 
C16   1    0.321980    0.433062    0.729772    11.00000    0.03778    0.03397 = 
         0.03278   -0.00968   -0.00458   -0.01485 
C17   1    0.381460    0.310758    0.665472    11.00000    0.03515    0.04003 = 
         0.04167   -0.01430   -0.00737   -0.01411 
C18   1    0.320937    0.212184    0.866253    11.00000    0.03540    0.04315 = 
         0.04622   -0.00314   -0.01147   -0.01666 
C19   1    0.294980    0.115380    0.973609    11.00000    0.05500    0.05022 = 
         0.06566    0.01043   -0.02049   -0.02438 
AFIX  43 
H19   2    0.321416    0.019065    0.976892    11.00000   -1.20000 
AFIX   0 
C20   1    0.228172    0.167039    1.076101    11.00000    0.05770    0.08776 = 
         0.04362    0.01443   -0.00940   -0.03013 
AFIX  43 
H20   2    0.208812    0.104290    1.149585    11.00000   -1.20000 
AFIX   0 
C21   1    0.189895    0.308797    1.071637    11.00000    0.05344    0.09029 = 
         0.03782   -0.00717   -0.00193   -0.02203 
AFIX  43 
H21   2    0.146744    0.340527    1.142092    11.00000   -1.20000 
AFIX   0 
C22   1    0.214908    0.405199    0.963136    11.00000    0.04531    0.06145 = 
         0.03790   -0.01266   -0.00262   -0.01478 
AFIX  43 
H22   2    0.186808    0.501690    0.960063    11.00000   -1.20000 
AFIX   0 
C23   1    0.281958    0.356289    0.859817    11.00000    0.03178    0.04320 = 
         0.03631   -0.00722   -0.00621   -0.01456 
C24   1    0.433511    0.050323    0.720805    11.00000    0.08795    0.03984 = 
         0.09291   -0.02316   -0.03192   -0.01399 
AFIX 137 
H24A  2    0.333226    0.029060    0.722318    11.00000   -1.50000 
H24B  2    0.505002   -0.024202    0.779094    11.00000   -1.50000 
H24C  2    0.496374    0.055495    0.641457    11.00000   -1.50000 
AFIX   0 
N1    3    0.381927    0.187524    0.750401    11.00000    0.04925    0.03282 = 
         0.05406   -0.01114   -0.01401   -0.01493 
O1    4    0.245319    0.867994    0.669741    11.00000    0.09763    0.03852 = 
         0.23486   -0.03619   -0.06830   -0.01463 
O2    4    0.423570    0.321321    0.557641    11.00000    0.05917    0.05770 = 
         0.04255   -0.02290   -0.00402   -0.02075 
HKLF 4 
  
REM  acn in P-1 
REM R1 =  0.0425 for    2536 Fo > 4sig(Fo)  and  0.0557 for all    3187 data 
REM    245 parameters refined using      0 restraints 
  
END 
  
WGHT      0.0490      0.2498 
  
REM Highest difference peak  0.233,  deepest hole -0.255,  1-sigma level  0.035 
Q1    1   0.2096  0.8353  0.7548  11.00000  0.05    0.23 
Q2    1   0.2490  0.8801  0.6373  11.00000  0.05    0.22 
Q3    1   0.3816  0.0976  0.6236  11.00000  0.05    0.15 
Q4    1   0.5715 -0.0023  0.7127  11.00000  0.05    0.15 
Q5    1   0.3870  0.4680  0.7234  11.00000  0.05    0.14 
; 
_shelx_res_checksum    9138 
  
_shelx_hkl_file 
; 
   1  -1   1  166.79    3.09 
   1  -1   1  172.52    3.10 
   1  -1   1  171.96    3.10 
  -1   1  -1  165.60    3.09 
  -1   1  -1  170.86    3.09 
  -1   1  -1  169.19    3.10 
   2  -2   2    7.56    0.30 
   2  -2   2    7.32    0.30 
   2  -2   2    7.54    0.30 
  -2   2  -2    7.06    0.29 
  -2   2  -2    7.48    0.29 
   3  -3   3    0.33    0.12 
   3  -3   3    0.51    0.13 
   3  -3   3    0.70    0.15 
  -3   3  -3    0.36    0.12 
   4  -4   4    0.22    0.15 
  -4   4  -4   -0.07    0.12 
   5  -5   5    0.12    0.15 
  -5   5  -5   -0.06    0.16 
  -5   5  -4    1.75    0.30 
   5  -5   4    1.68    0.27 
  -4   4  -3    3.33    0.34 
   4  -4   3    4.34    0.33 
  -3   3  -2   17.61    0.57 
   3  -3   2   15.28    0.55 
   3  -3   2   17.26    0.57 
   3  -3   2   16.44    0.56 
  -2   2  -1   54.61    1.17 
  -2   2  -1   52.93    1.16 
  -2   2  -1   54.29    1.15 
   2  -2   1   55.75    1.16 
   2  -2   1   53.57    1.16 
   2  -2   1   51.99    1.15 
  -1   1   0   39.35    0.79 
  -1   1   0   38.88    0.79 
  -1   1   0   38.72    0.79 
   1  -1   0   38.65    0.79 
   1  -1   0   38.34    0.79 
   1  -1   0   39.73    0.79 
   0   0   1    2.07    0.07 
   0   0   1    2.55    0.07 
   0   0   1    2.31    0.07 
   0   0  -1    2.62    0.07 
   0   0  -1    2.66    0.07 
   1  -1   2    0.22    0.08 
   1  -1   2    0.26    0.07 
   1  -1   2    0.26    0.06 
   1  -1   2    0.26    0.07 
  -1   1  -2    0.19    0.06 
  -1   1  -2    0.25    0.06 
  -1   1  -2    0.25    0.06 
  -1   1  -2    0.30    0.08 
   2  -2   3  156.71    3.02 
   2  -2   3  153.64    3.01 
  -2   2  -3  160.23    3.00 
  -2   2  -3  156.16    3.00 
  -2   2  -3  162.60    3.02 
  -2   2  -3  158.17    3.04 
   3  -3   4    2.60    0.24 
   3  -3   4    3.41    0.29 
   3  -3   4    3.31    0.26 
  -3   3  -4    3.17    0.25 
   4  -4   5    0.10    0.13 
  -4   4  -5    0.21    0.15 
   5  -5   6    0.94    0.23 
  -5   5  -6    1.17    0.32 
  -6   6  -4    1.07    0.28 
   6  -6   4    0.79    0.24 
  -5   5  -3    0.31    0.19 
   5  -5   3    0.36    0.17 
  -4   4  -2    2.88    0.30 
   4  -4   2    2.99    0.29 
  -3   3  -1    0.49    0.14 
  -3   3  -1    0.51    0.13 
   3  -3   1    0.49    0.13 
   3  -3   1    0.74    0.14 
  -2   2   0    0.18    0.07 
  -2   2   0    0.11    0.07 
  -2   2   0    0.21    0.08 
   2  -2   0    0.04    0.06 
   2  -2   0    0.17    0.09 
   2  -2   0    0.07    0.07 
   2  -2   0    0.09    0.06 
  -1   1   1    1.38    0.11 
  -1   1   1    1.35    0.10 
  -1   1   1    1.32    0.10 
  -1   1   1    1.19    0.09 
   1  -1  -1    1.14    0.09 
   1  -1  -1    1.11    0.10 
   1  -1  -1    1.24    0.09 
   1  -1  -1    1.21    0.09 
   0   0   2  277.14    5.08 
   0   0   2  283.49    5.05 
   0   0   2  283.11    5.15 
   0   0  -2  282.55    5.06 
   0   0  -2  286.62    5.07 
   0   0  -2  278.12    5.04 
   1  -1   3   11.75    0.33 
   1  -1   3   11.90    0.33 
   1  -1   3   11.79    0.34 
   1  -1   3   11.85    0.37 
  -1   1  -3   12.11    0.36 
  -1   1  -3   12.06    0.32 
  -1   1  -3   11.96    0.32 
  -1   1  -3   12.75    0.32 
   2  -2   4   66.74    1.43 
   2  -2   4   68.17    1.46 
   2  -2   4   66.62    1.44 
  -2   2  -4   67.86    1.42 
  -2   2  -4   66.38    1.47 
  -2   2  -4   70.43    1.50 
   3  -3   5    8.79    0.42 
   3  -3   5    8.68    0.42 
   3  -3   5    9.58    0.43 
  -3   3  -5    9.07    0.40 
   4  -4   6    0.24    0.14 
  -4   4  -6   -0.04    0.12 
   5  -5   7   -0.10    0.15 
  -6   6  -3    0.52    0.24 
   6  -6   3    0.29    0.19 
  -5   5  -2    6.13    0.46 
   5  -5   2    5.18    0.41 
  -4   4  -1    0.01    0.14 
   4  -4   1    0.19    0.12 
  -3   3   0   35.48    0.91 
  -3   3   0   35.40    0.90 
  -3   3   0   35.74    0.93 
   3  -3   0   35.87    0.92 
   3  -3   0   35.24    0.91 
  -2   2   1   13.36    0.41 
  -2   2   1   13.60    0.40 
   2  -2  -1   12.87    0.40 
   2  -2  -1   13.14    0.40 
   2  -2  -1   12.84    0.40 
   2  -2  -1   13.54    0.42 
  -1   1   2  339.56    6.28 
  -1   1   2  344.55    6.28 
  -1   1   2  350.07    6.28 
  -1   1   2  356.99    6.31 
   1  -1  -2  348.57    6.27 
   1  -1  -2  356.82    6.30 
   1  -1  -2  359.33    6.28 
   0   0   3  411.60    7.45 
   0   0   3  410.93    7.41 
   0   0   3  411.86    7.50 
   0   0  -3  413.43    7.32 
   0   0  -3  411.55    7.34 
   0   0  -3  399.32    7.29 
   1  -1   4    7.79    0.31 
   1  -1   4    7.93    0.27 
   1  -1   4    7.67    0.27 
   1  -1   4    8.06    0.27 
  -1   1  -4    8.15    0.25 
  -1   1  -4    8.31    0.25 
  -1   1  -4    7.98    0.30 
  -1   1  -4    7.70    0.24 
   2  -2   5   17.25    0.54 
   2  -2   5   17.85    0.55 
   2  -2   5   18.09    0.59 
   2  -2   5   18.10    0.54 
  -2   2  -5   18.27    0.52 
   3  -3   6    0.84    0.17 
   3  -3   6    0.75    0.17 
   3  -3   6    1.05    0.21 
  -3   3  -6    0.73    0.16 
   4  -4   7    0.06    0.12 
  -4   4  -7   -0.11    0.10 
   5  -5   8    0.16    0.19 
  -6   6  -2    0.23    0.21 
   6  -6   2    0.19    0.18 
  -5   5  -1    0.12    0.16 
   5  -5   1   -0.05    0.11 
  -4   4   0    0.80    0.19 
   4  -4   0    0.86    0.17 
  -3   3   1    1.68    0.19 
  -3   3   1    1.41    0.19 
  -3   3   1    1.22    0.18 
   3  -3  -1    1.04    0.16 
  -2   2   2    7.94    0.31 
  -2   2   2    8.72    0.30 
  -2   2   2    8.24    0.31 
   2  -2  -2    7.72    0.29 
   2  -2  -2    8.48    0.30 
   2  -2  -2    8.12    0.30 
   2  -2  -2    8.82    0.33 
  -1   1   3  411.55    7.32 
  -1   1   3  410.33    7.32 
  -1   1   3  403.23    7.35 
  -1   1   3  405.24    7.32 
   1  -1  -3  407.72    7.30 
   1  -1  -3  409.88    7.35 
   1  -1  -3  408.43    7.30 
   1  -1  -3  418.59    7.30 
   0   0   4   21.33    0.47 
   0   0   4   22.09    0.47 
   0   0   4   21.04    0.47 
   0   0  -4   21.24    0.42 
   0   0  -4   21.52    0.43 
   0   0  -4   21.69    0.43 
   0   0  -4   21.74    0.42 
   1  -1   5   16.41    0.45 
   1  -1   5   16.89    0.46 
   1  -1   5   16.62    0.45 
   1  -1   5   16.56    0.51 
  -1   1  -5   17.23    0.41 
  -1   1  -5   16.23    0.41 
  -1   1  -5   16.73    0.41 
   2  -2   6   34.22    0.87 
   2  -2   6   33.77    0.86 
   2  -2   6   34.28    0.88 
   2  -2   6   34.88    0.94 
  -2   2  -6   33.28    0.81 
   3  -3   7    6.16    0.37 
   3  -3   7    5.94    0.37 
  -3   3  -7    5.75    0.32 
   4  -4   8    0.06    0.13 
  -6   6  -1    0.10    0.21 
   6  -6   1   -0.12    0.15 
  -5   5   0    0.26    0.19 
   5  -5   0    0.47    0.17 
  -4   4   1   -0.04    0.14 
  -4   4   1   -0.13    0.13 
   4  -4  -1    0.04    0.11 
  -3   3   2    3.03    0.22 
  -3   3   2    3.00    0.25 
  -3   3   2    2.80    0.22 
   3  -3  -2    2.79    0.22 
  -2   2   3    1.07    0.13 
  -2   2   3    1.18    0.13 
  -2   2   3    1.30    0.15 
  -2   2   3    1.10    0.13 
   2  -2  -3    1.04    0.12 
   2  -2  -3    1.30    0.13 
   2  -2  -3    1.06    0.11 
   2  -2  -3    1.47    0.16 
  -1   1   4   33.90    0.73 
  -1   1   4   33.92    0.72 
  -1   1   4   33.73    0.73 
  -1   1   4   34.57    0.76 
   1  -1  -4   33.51    0.69 
   1  -1  -4   34.54    0.69 
   1  -1  -4   34.24    0.75 
   1  -1  -4   33.29    0.68 
   0   0   5   78.40    1.52 
   0   0   5   77.74    1.52 
   0   0   5   79.57    1.52 
   0   0  -5   80.77    1.45 
   0   0  -5   81.08    1.45 
   1  -1   6   18.73    0.52 
   1  -1   6   19.22    0.52 
   1  -1   6   19.66    0.52 
   1  -1   6   20.10    0.61 
  -1   1  -6   19.74    0.47 
  -1   1  -6   19.44    0.45 
   2  -2   7    0.15    0.10 
   2  -2   7    0.29    0.16 
   2  -2   7    0.19    0.11 
   2  -2   7    0.09    0.09 
  -2   2  -7    0.16    0.08 
   3  -3   8    0.07    0.11 
  -3   3  -8    0.00    0.08 
   4  -4   9    0.60    0.19 
  -6   6   0    1.41    0.31 
   6  -6   0    1.78    0.31 
  -5   5   1    2.91    0.37 
   5  -5  -1    2.65    0.30 
  -4   4   2    8.87    0.47 
  -4   4   2    8.41    0.46 
   4  -4  -2    8.63    0.43 
  -3   3   3   11.52    0.46 
  -3   3   3   11.00    0.45 
  -3   3   3   11.15    0.43 
   3  -3  -3   11.62    0.43 
  -2   2   4    9.43    0.33 
  -2   2   4    9.40    0.35 
  -2   2   4    9.33    0.37 
  -2   2   4    9.91    0.35 
   2  -2  -4    8.91    0.32 
   2  -2  -4    9.52    0.36 
   2  -2  -4   10.05    0.32 
  -1   1   5    4.02    0.18 
  -1   1   5    3.83    0.20 
  -1   1   5    3.71    0.18 
  -1   1   5    3.72    0.17 
   1  -1  -5    3.86    0.13 
   1  -1  -5    3.60    0.13 
   1  -1  -5    4.00    0.14 
   1  -1  -5    3.81    0.14 
   0   0   6   16.90    0.43 
   0   0   6   16.74    0.43 
   0   0   6   16.76    0.43 
   0   0  -6   16.76    0.33 
   0   0  -6   16.57    0.33 
   1  -1   7    1.38    0.14 
   1  -1   7    1.34    0.20 
   1  -1   7    1.63    0.16 
   1  -1   7    1.54    0.16 
  -1   1  -7    1.71    0.11 
  -1   1  -7    1.62    0.10 
  -1   1  -7    1.45    0.09 
   2  -2   8   33.52    0.92 
   2  -2   8   34.66    1.03 
   2  -2   8   35.17    0.92 
   2  -2   8   34.25    0.92 
   3  -3   9    0.31    0.14 
   4  -4  10    1.50    0.27 
  -6   6   1    0.81    0.26 
   6  -6  -1    0.44    0.20 
  -5   5   2    3.01    0.36 
   5  -5  -2    2.84    0.31 
  -4   4   3    1.05    0.22 
  -4   4   3    0.80    0.19 
  -4   4   3    0.59    0.18 
   4  -4  -3    0.69    0.16 
  -3   3   4   -0.02    0.11 
  -3   3   4    0.10    0.11 
  -3   3   4    0.01    0.09 
   3  -3  -4    0.00    0.08 
  -2   2   5   85.34    1.74 
  -2   2   5   85.53    1.79 
  -2   2   5   86.45    1.76 
  -2   2   5   86.45    1.76 
   2  -2  -5   87.36    1.70 
   2  -2  -5   86.24    1.69 
  -1   1   6   70.76    1.41 
  -1   1   6   69.30    1.41 
  -1   1   6   70.77    1.44 
  -1   1   6   70.08    1.40 
   1  -1  -6   70.12    1.28 
   1  -1  -6   70.16    1.31 
   1  -1  -6   70.65    1.28 
   1  -1  -6   70.72    1.31 
   0   0   7   20.57    0.51 
   0   0   7   20.07    0.52 
   0   0   7   21.63    0.53 
   0   0   7   20.26    0.52 
   1  -1   8   -0.11    0.10 
   1  -1   8   -0.01    0.08 
   1  -1   8   -0.04    0.07 
   1  -1   8    0.09    0.07 
  -1   1  -8    0.02    0.04 
   2  -2   9   -0.02    0.11 
   2  -2   9    0.04    0.09 
   2  -2   9    0.26    0.16 
   3  -3  10    5.52    0.39 
  -6   6   2    0.98    0.28 
   6  -6  -2    0.72    0.21 
  -5   5   3    4.94    0.46 
  -5   5   3    4.27    0.41 
   5  -5  -3    4.37    0.35 
  -4   4   4    1.40    0.23 
  -4   4   4    1.68    0.23 
  -4   4   4    1.45    0.23 
   4  -4  -4    1.45    0.21 
  -3   3   5    2.28    0.22 
  -3   3   5    2.39    0.23 
  -3   3   5    2.79    0.25 
   3  -3  -5    2.23    0.20 
  -2   2   6   21.11    0.62 
  -2   2   6   20.40    0.57 
  -2   2   6   20.57    0.59 
  -2   2   6   20.97    0.59 
   2  -2  -6   20.60    0.51 
   2  -2  -6   20.90    0.51 
   2  -2  -6   19.74    0.51 
  -1   1   7   61.75    1.30 
  -1   1   7   63.55    1.29 
  -1   1   7   62.86    1.33 
  -1   1   7   64.21    1.31 
   0   0   8   -0.03    0.06 
   0   0   8   -0.03    0.07 
   0   0   8    0.03    0.06 
   0   0   8    0.03    0.07 
   1  -1   9    4.10    0.26 
   1  -1   9    3.43    0.25 
   1  -1   9    3.94    0.27 
   1  -1   9    4.44    0.41 
   2  -2  10    3.28    0.32 
   2  -2  10    3.08    0.36 
   2  -2  10    3.76    0.29 
   3  -3  11    0.16    0.14 
  -6   6   3    2.95    0.41 
  -5   5   4    2.89    0.36 
  -5   5   4    2.86    0.38 
   5  -5  -4    2.34    0.28 
  -4   4   5    0.10    0.13 
  -4   4   5    0.07    0.14 
  -4   4   5    0.33    0.17 
   4  -4  -5    0.27    0.13 
  -3   3   6    1.77    0.20 
  -3   3   6    1.33    0.19 
  -3   3   6    1.56    0.21 
   3  -3  -6    1.54    0.17 
  -2   2   7    6.07    0.28 
  -2   2   7    5.93    0.30 
  -2   2   7    5.58    0.30 
  -2   2   7    6.09    0.34 
   2  -2  -7    5.88    0.23 
   2  -2  -7    6.50    0.22 
   2  -2  -7    5.74    0.21 
  -1   1   8    1.91    0.17 
  -1   1   8    1.87    0.16 
  -1   1   8    1.97    0.17 
  -1   1   8    1.94    0.19 
   0   0   9    0.02    0.08 
   0   0   9    0.00    0.08 
   0   0   9    0.06    0.08 
   0   0   9    0.00    0.08 
   0   0   9   -0.19    0.13 
   1  -1  10    0.21    0.12 
   1  -1  10    0.14    0.16 
   1  -1  10    0.18    0.10 
   2  -2  11    0.33    0.20 
   2  -2  11    0.14    0.13 
   2  -2  11    0.10    0.11 
   3  -3  12    0.52    0.19 
  -6   6   4    0.30    0.24 
  -5   5   5    0.96    0.25 
  -5   5   5    0.82    0.23 
  -4   4   6    0.53    0.20 
  -4   4   6    0.18    0.15 
  -4   4   6    0.24    0.16 
   4  -4  -6    0.26    0.12 
  -3   3   7    1.75    0.21 
  -3   3   7    2.26    0.25 
  -3   3   7    2.53    0.24 
   3  -3  -7    2.45    0.19 
   3  -3  -7    2.45    0.20 
  -2   2   8   11.25    0.47 
  -2   2   8   11.57    0.44 
  -2   2   8   11.26    0.41 
  -2   2   8   12.04    0.44 
   2  -2  -8   11.86    0.31 
   2  -2  -8   11.69    0.26 
   2  -2  -8   11.53    0.26 
  -1   1   9    2.32    0.20 
  -1   1   9    2.80    0.24 
  -1   1   9    2.67    0.22 
   0   0  10    8.15    0.31 
   0   0  10    8.63    0.49 
   0   0  10    8.18    0.36 
   0   0  10    8.97    0.36 
   0   0  10    8.05    0.39 
   1  -1  11    0.13    0.10 
   1  -1  11    0.05    0.11 
   1  -1  11    0.06    0.16 
   2  -2  12    0.21    0.13 
   2  -2  12   -0.08    0.12 
   2  -2  12    0.08    0.18 
  -6   6   5    0.28    0.22 
  -6   6   5    0.22    0.22 
  -5   5   6    0.08    0.18 
  -5   5   6    0.34    0.20 
  -4   4   7    3.37    0.34 
  -4   4   7    3.22    0.34 
  -3   3   8    0.27    0.13 
  -3   3   8    0.19    0.11 
  -3   3   8    0.26    0.14 
   3  -3  -8    0.02    0.04 
   3  -3  -8    0.09    0.07 
  -2   2   9   17.83    0.58 
  -2   2   9   17.64    0.59 
  -2   2   9   17.72    0.61 
  -2   2   9   17.44    0.56 
  -1   1  10    5.20    0.29 
  -1   1  10    5.20    0.29 
  -1   1  10    5.48    0.30 
   0   0  11    2.65    0.22 
   0   0  11    3.69    0.41 
   0   0  11    2.80    0.19 
   0   0  11    3.00    0.25 
   1  -1  12    0.87    0.17 
   1  -1  12    0.78    0.18 
   1  -1  12    1.17    0.26 
   2  -2  13    0.41    0.24 
   2  -2  13    0.56    0.20 
   2  -2  13    0.38    0.17 
  -6   6   6   -0.01    0.23 
  -6   6   6   -0.11    0.21 
  -5   5   7    2.19    0.34 
  -5   5   7    2.51    0.34 
  -4   4   8    2.38    0.30 
  -4   4   8    2.98    0.34 
  -3   3   9   -0.04    0.11 
  -3   3   9    0.12    0.12 
  -2   2  10    0.41    0.14 
  -2   2  10    0.34    0.13 
  -2   2  10    0.36    0.15 
  -1   1  11    0.00    0.11 
  -1   1  11   -0.12    0.09 
  -1   1  11    0.05    0.10 
   0   0  12    1.30    0.28 
   0   0  12    1.38    0.19 
   0   0  12    1.61    0.21 
   1  -1  13    0.25    0.13 
   1  -1  13   -0.02    0.13 
   1  -1  13    0.18    0.21 
  -5   5   8    0.63    0.23 
  -5   5   8    0.44    0.22 
  -4   4   9   -0.04    0.15 
  -4   4   9    0.11    0.16 
  -3   3  10    0.36    0.15 
  -3   3  10    0.43    0.16 
  -2   2  11    3.50    0.29 
  -2   2  11    3.18    0.29 
  -1   1  12   -0.01    0.11 
  -1   1  12    0.17    0.11 
   0   0  13   -0.19    0.09 
   0   0  13    0.06    0.11 
   0   0  13   -0.02    0.16 
  -5   5   9    0.11    0.19 
  -5   5   9    0.43    0.22 
  -4   4  10    0.64    0.21 
  -4   4  10    0.56    0.19 
  -3   3  11    1.16    0.22 
  -3   3  11    1.11    0.22 
  -2   2  12    0.16    0.13 
  -2   2  12    0.39    0.17 
  -1   1  13    0.25    0.13 
  -1   1  13   -0.09    0.10 
  -4   4  11    0.09    0.16 
  -4   4  11   -0.10    0.14 
  -3   3  12    2.92    0.32 
  -3   3  12    2.70    0.31 
  -2   2  13   -0.22    0.11 
  -2   2  13    0.04    0.12 
  -2   1  13    0.62    0.16 
  -2   1  13    0.35    0.15 
  -3   2  12    2.41    0.28 
  -3   2  12    2.20    0.27 
  -4   3  11    0.25    0.17 
  -4   3  11    0.14    0.16 
  -5   4  10   -0.13    0.15 
  -5   4  10   -0.06    0.18 
  -1   0  13   -0.08    0.10 
  -1   0  13    0.13    0.11 
  -1   0  13   -0.27    0.14 
  -2   1  12   -0.03    0.10 
  -2   1  12    0.03    0.14 
  -2   1  12   -0.05    0.11 
  -3   2  11    0.75    0.17 
  -3   2  11    0.66    0.17 
  -3   2  11    0.25    0.17 
  -4   3  10    0.76    0.19 
  -4   3  10    0.38    0.17 
  -5   4   9    0.21    0.19 
  -5   4   9    0.65    0.21 
   0  -1  13    2.02    0.35 
   0  -1  13    1.55    0.21 
   0  -1  13    1.61    0.22 
  -1   0  12    0.30    0.12 
  -1   0  12    0.62    0.22 
  -1   0  12    0.31    0.13 
  -2   1  11   12.00    0.47 
  -2   1  11   11.29    0.49 
  -2   1  11   11.59    0.46 
  -3   2  10    2.41    0.26 
  -3   2  10    2.39    0.26 
  -3   2  10    2.40    0.29 
  -4   3   9    0.26    0.15 
  -4   3   9    0.36    0.16 
  -5   4   8    2.30    0.32 
  -5   4   8    2.51    0.33 
  -6   5   7   -0.16    0.18 
  -6   5   7    0.03    0.20 
   1  -2  13    0.09    0.14 
   1  -2  13    0.13    0.23 
   1  -2  13    0.72    0.17 
   0  -1  12    0.32    0.12 
   0  -1  12    0.27    0.12 
   0  -1  12   -0.09    0.16 
  -1   0  11    0.53    0.14 
  -1   0  11    0.78    0.14 
  -1   0  11    0.51    0.13 
  -2   1  10    4.71    0.27 
  -2   1  10    4.85    0.32 
  -2   1  10    5.20    0.29 
  -2   1  10    4.95    0.29 
  -3   2   9    0.59    0.16 
  -3   2   9    0.27    0.17 
  -3   2   9    0.56    0.14 
  -4   3   8    0.30    0.16 
  -4   3   8    0.04    0.13 
  -5   4   7   -0.06    0.15 
  -5   4   7   -0.02    0.15 
  -6   5   6    0.18    0.19 
  -6   5   6   -0.03    0.19 
   1  -2  12    0.94    0.27 
   1  -2  12    0.70    0.18 
   1  -2  12    0.50    0.15 
   0  -1  11    0.79    0.14 
   0  -1  11    0.68    0.12 
   0  -1  11    0.47    0.13 
   0  -1  11    0.17    0.16 
  -1   0  10    1.85    0.18 
  -1   0  10    1.85    0.20 
  -1   0  10    1.86    0.18 
  -2   1   9    6.12    0.35 
  -2   1   9    6.74    0.32 
  -2   1   9    6.04    0.31 
  -2   1   9    6.37    0.29 
   3  -2  -8    0.10    0.05 
  -3   2   8    0.05    0.11 
  -3   2   8    0.15    0.09 
  -3   2   8    0.05    0.10 
  -3   2   8   -0.04    0.15 
   4  -3  -7    4.15    0.26 
  -4   3   7    4.40    0.33 
  -4   3   7    4.64    0.35 
  -5   4   6    1.62    0.26 
  -5   4   6    1.99    0.29 
  -6   5   5    0.00    0.17 
  -6   5   5    0.15    0.19 
   2  -3  12    2.75    0.42 
   2  -3  12    2.28    0.29 
   2  -3  12    2.71    0.32 
   1  -2  11    0.14    0.10 
   1  -2  11   -0.15    0.13 
   1  -2  11   -0.08    0.10 
   0  -1  10    1.16    0.23 
   0  -1  10    1.14    0.15 
   0  -1  10    1.22    0.16 
   0  -1  10    1.16    0.15 
  -1   0   9   31.66    0.76 
  -1   0   9   31.16    0.75 
  -1   0   9   30.59    0.79 
  -1   0   9   31.03    0.75 
  -2   1   8    5.63    0.28 
  -2   1   8    6.00    0.29 
  -2   1   8    5.57    0.33 
  -2   1   8    5.80    0.26 
   3  -2  -7    0.12    0.06 
   3  -2  -7    0.05    0.06 
  -3   2   7    0.05    0.11 
  -3   2   7   -0.02    0.09 
  -3   2   7    0.11    0.08 
  -3   2   7    0.13    0.14 
   4  -3  -6    0.28    0.10 
  -4   3   6    0.14    0.11 
  -4   3   6    0.20    0.13 
  -4   3   6    0.32    0.14 
   5  -4  -5    0.11    0.11 
  -5   4   5   -0.06    0.15 
  -5   4   5   -0.02    0.15 
  -6   5   4    2.80    0.39 
   2  -3  11    0.27    0.13 
   2  -3  11    0.14    0.15 
   2  -3  11    0.17    0.19 
   1  -2  10    7.90    0.37 
   1  -2  10    8.08    0.39 
   1  -2  10    7.09    0.46 
   0  -1   9   24.87    0.81 
   0  -1   9   23.77    0.65 
   0  -1   9   24.09    0.64 
   0  -1   9   24.45    0.64 
  -1   0   8    4.28    0.21 
  -1   0   8    4.25    0.22 
  -1   0   8    5.07    0.26 
  -1   0   8    4.54    0.22 
  -2   1   7    7.24    0.28 
  -2   1   7    7.61    0.30 
  -2   1   7    7.70    0.31 
  -2   1   7    7.52    0.36 
   3  -2  -6    0.41    0.09 
   3  -2  -6    0.35    0.08 
  -3   2   6    0.42    0.13 
  -3   2   6    0.31    0.10 
  -3   2   6    0.43    0.12 
  -3   2   6    0.57    0.16 
   4  -3  -5    0.04    0.08 
  -4   3   5    0.18    0.12 
  -4   3   5   -0.23    0.10 
  -4   3   5   -0.02    0.12 
   5  -4  -4    2.19    0.25 
  -5   4   4    2.02    0.29 
  -5   4   4    2.54    0.32 
   6  -5  -3    0.35    0.28 
  -6   5   3    0.73    0.26 
   3  -4  11    0.37    0.17 
   2  -3  10    0.44    0.22 
   2  -3  10    0.16    0.12 
   2  -3  10    0.23    0.15 
   1  -2   9    5.14    0.39 
   1  -2   9    5.37    0.31 
   1  -2   9    5.64    0.35 
   1  -2   9    4.57    0.28 
   0  -1   8    0.16    0.07 
   0  -1   8    0.24    0.08 
   0  -1   8    0.28    0.15 
   0  -1   8    0.25    0.08 
  -1   0   7   71.15    1.39 
  -1   0   7   70.40    1.40 
  -1   0   7   69.34    1.40 
  -1   0   7   72.00    1.47 
  -1   0   7   71.10    1.40 
   2  -1  -6   16.19    0.35 
   2  -1  -6   16.02    0.35 
  -2   1   6   15.09    0.45 
  -2   1   6   16.07    0.44 
  -2   1   6   16.64    0.52 
  -2   1   6   16.19    0.46 
   3  -2  -5   14.12    0.43 
  -3   2   5   14.53    0.54 
  -3   2   5   14.29    0.49 
  -3   2   5   14.76    0.48 
   4  -3  -4   11.52    0.46 
  -4   3   4   11.33    0.50 
  -4   3   4   12.36    0.50 
  -4   3   4   11.97    0.51 
   5  -4  -3    6.74    0.40 
  -5   4   3    6.65    0.44 
  -5   4   3    5.88    0.43 
   6  -5  -2    1.13    0.23 
  -6   5   2    0.88    0.27 
   3  -4  10    0.04    0.13 
   2  -3   9   17.46    0.64 
   2  -3   9   15.78    0.60 
   2  -3   9   16.35    0.71 
   1  -2   8    5.89    0.30 
   1  -2   8    6.15    0.38 
   1  -2   8    6.16    0.30 
   1  -2   8    6.05    0.31 
   0  -1   7    0.85    0.17 
   0  -1   7    0.59    0.10 
   0  -1   7    0.76    0.10 
   0  -1   7    0.75    0.10 
  -1   0   6   20.49    0.48 
  -1   0   6   20.29    0.48 
  -1   0   6   20.28    0.47 
  -1   0   6   21.13    0.48 
  -1   0   6   20.87    0.55 
   2  -1  -5   14.73    0.36 
   2  -1  -5   14.60    0.34 
   2  -1  -5   14.79    0.35 
   2  -1  -5   14.45    0.34 
  -2   1   5   13.59    0.46 
  -2   1   5   14.61    0.42 
  -2   1   5   15.10    0.42 
  -2   1   5   14.33    0.40 
  -3   2   4    7.09    0.32 
  -3   2   4    7.03    0.33 
  -3   2   4    6.84    0.31 
  -3   2   4    7.18    0.36 
   4  -3  -3    0.06    0.10 
  -4   3   3    0.05    0.13 
  -4   3   3    0.06    0.12 
  -4   3   3    0.02    0.10 
   5  -4  -2    0.58    0.16 
  -5   4   2    1.21    0.26 
   6  -5  -1    0.39    0.18 
  -6   5   1    0.49    0.21 
   3  -4   9    0.64    0.18 
  -2   3  -8    4.50    0.22 
   2  -3   8    4.92    0.37 
   2  -3   8    4.23    0.30 
   2  -3   8    4.95    0.34 
  -1   2  -7   12.82    0.30 
  -1   2  -7   12.37    0.29 
   1  -2   7   13.37    0.44 
   1  -2   7   12.41    0.42 
   1  -2   7   12.85    0.43 
   1  -2   7   12.30    0.51 
   0  -1   6   32.82    0.74 
   0  -1   6   34.69    0.74 
   0  -1   6   34.61    0.88 
   0  -1   6   34.45    0.74 
  -1   0   5   59.78    1.14 
  -1   0   5   58.48    1.14 
  -1   0   5   59.66    1.15 
  -1   0   5   60.13    1.14 
  -1   0   5   58.53    1.22 
   2  -1  -4   10.18    0.36 
   2  -1  -4   10.02    0.28 
   2  -1  -4   10.50    0.29 
   2  -1  -4    9.70    0.28 
  -2   1   4   10.00    0.37 
  -2   1   4   10.13    0.32 
  -2   1   4   10.02    0.31 
  -2   1   4   10.15    0.32 
   3  -2  -3   11.40    0.39 
  -3   2   3   11.64    0.41 
  -3   2   3   12.09    0.43 
  -3   2   3   12.27    0.43 
  -3   2   3   12.37    0.47 
   4  -3  -2    6.24    0.34 
  -4   3   2    6.31    0.38 
  -4   3   2    7.05    0.38 
  -4   3   2    6.89    0.36 
   5  -4  -1   10.85    0.52 
  -5   4   1   11.10    0.57 
   6  -5   0    0.03    0.14 
  -6   5   0    0.10    0.19 
   4  -5   9    0.23    0.18 
   3  -4   8    0.31    0.15 
  -2   3  -7   14.57    0.45 
   2  -3   7   15.85    0.55 
   2  -3   7   14.68    0.62 
   2  -3   7   15.52    0.58 
   2  -3   7   15.75    0.55 
  -1   2  -6   21.67    0.51 
  -1   2  -6   22.79    0.51 
   1  -2   6   22.60    0.61 
   1  -2   6   22.69    0.69 
   1  -2   6   21.65    0.59 
   1  -2   6   23.61    0.61 
   0  -1   5    0.05    0.04 
   0  -1   5   -0.13    0.06 
   0  -1   5   -0.01    0.04 
   0  -1   5    0.05    0.04 
  -1   0   4  299.16    5.33 
  -1   0   4  297.42    5.33 
  -1   0   4  301.73    5.33 
  -1   0   4  296.43    5.33 
  -1   0   4  298.80    5.41 
   2  -1  -3   55.23    1.17 
   2  -1  -3   55.74    1.11 
   2  -1  -3   56.09    1.10 
   2  -1  -3   53.92    1.10 
  -2   1   3   55.22    1.18 
  -2   1   3   54.75    1.12 
  -2   1   3   54.01    1.13 
   3  -2  -2    3.36    0.22 
   3  -2  -2    3.84    0.22 
   3  -2  -2    3.49    0.23 
  -3   2   2    3.45    0.23 
  -3   2   2    3.58    0.23 
  -3   2   2    3.72    0.22 
   4  -3  -1    2.85    0.26 
  -4   3   1    3.28    0.29 
  -4   3   1    2.79    0.26 
  -4   3   1    2.38    0.26 
   5  -4   0    1.87    0.25 
  -5   4   0    1.48    0.26 
   6  -5   1    0.14    0.16 
  -6   5  -1    0.10    0.19 
   4  -5   8    0.17    0.15 
  -3   4  -7    0.09    0.10 
   3  -4   7   -0.14    0.09 
  -2   3  -6    2.11    0.19 
   2  -3   6    2.06    0.21 
   2  -3   6    2.01    0.21 
  -1   2  -5   34.49    0.75 
  -1   2  -5   32.39    0.72 
  -1   2  -5   33.42    0.84 
  -1   2  -5   33.19    0.72 
   1  -2   5   32.85    0.78 
   1  -2   5   33.43    0.78 
   1  -2   5   34.01    0.86 
   1  -2   5   32.45    0.77 
   0  -1   4    4.77    0.23 
   0  -1   4    4.53    0.16 
   0  -1   4    4.60    0.16 
   0  -1   4    4.64    0.16 
  -1   0   3  183.55    3.22 
  -1   0   3  178.55    3.22 
  -1   0   3  179.54    3.22 
  -1   0   3  179.99    3.30 
  -1   0   3  177.07    3.22 
   2  -1  -2   10.22    0.33 
   2  -1  -2    7.98    0.27 
   2  -1  -2    9.55    0.29 
   2  -1  -2    9.88    0.30 
  -2   1   2    9.72    0.31 
  -2   1   2    9.78    0.31 
  -2   1   2    9.80    0.30 
  -2   1   2    9.94    0.34 
   3  -2  -1   13.68    0.45 
   3  -2  -1   13.67    0.45 
   3  -2  -1   14.68    0.46 
  -3   2   1   13.89    0.45 
  -3   2   1   13.42    0.45 
   4  -3   0    7.86    0.40 
  -4   3   0    8.85    0.43 
   5  -4   1    4.34    0.35 
  -5   4  -1    4.93    0.40 
   6  -5   2    0.36    0.19 
  -6   5  -2    0.36    0.21 
   4  -5   7    0.70    0.20 
  -3   4  -6    0.04    0.10 
   3  -4   6    0.15    0.13 
   3  -4   6    0.12    0.11 
  -2   3  -5   15.62    0.49 
   2  -3   5   15.97    0.53 
   2  -3   5   15.05    0.52 
   2  -3   5   15.69    0.52 
  -1   2  -4   40.25    0.85 
  -1   2  -4   39.45    0.84 
  -1   2  -4   40.67    0.85 
  -1   2  -4   39.61    0.93 
   1  -2   4   39.60    0.88 
   1  -2   4   39.96    0.94 
   1  -2   4   39.85    0.89 
   1  -2   4   39.82    0.88 
   0   1  -3    0.28    0.03 
   0   1  -3    0.24    0.02 
   0  -1   3    0.11    0.06 
   0  -1   3    0.35    0.05 
   0  -1   3    0.29    0.04 
   0  -1   3    0.25    0.04 
   1   0  -2  352.52    6.34 
   1   0  -2  360.98    6.37 
   1   0  -2  348.20    6.35 
   1   0  -2  358.08    6.36 
  -1   0   2  361.32    6.54 
  -1   0   2  362.77    6.36 
  -1   0   2  360.70    6.42 
  -1   0   2  347.61    6.35 
   2  -1  -1   71.29    1.45 
   2  -1  -1   73.37    1.43 
   2  -1  -1   72.52    1.43 
   2  -1  -1   73.45    1.43 
  -2   1   1   72.43    1.43 
  -2   1   1   72.62    1.44 
  -2   1   1   72.17    1.46 
  -2   1   1   71.72    1.44 
   3  -2   0    0.14    0.07 
   3  -2   0   -0.02    0.07 
   3  -2   0    0.01    0.08 
  -3   2   0    0.13    0.08 
  -3   2   0    0.02    0.09 
   4  -3   1    0.21    0.12 
  -4   3  -1    0.17    0.13 
   5  -4   2    2.12    0.28 
  -5   4  -2    1.69    0.26 
   6  -5   3    0.18    0.17 
  -6   5  -3    0.87    0.26 
  -4   5  -6    0.79    0.20 
   4  -5   6    1.27    0.24 
  -3   4  -5    0.97    0.17 
   3  -4   5    1.01    0.18 
   3  -4   5    1.23    0.22 
  -2   3  -4    4.34    0.25 
   2  -3   4    4.61    0.27 
   2  -3   4    4.32    0.27 
   2  -3   4    4.87    0.27 
  -1   2  -3    6.39    0.23 
  -1   2  -3    6.61    0.24 
  -1   2  -3    6.67    0.23 
  -1   2  -3    6.69    0.27 
   1  -2   3    6.89    0.28 
   1  -2   3    6.57    0.25 
   1  -2   3    6.61    0.25 
   0   1  -2  108.14    2.01 
   0   1  -2  109.04    1.94 
   0   1  -2  108.13    1.94 
   0  -1   2  107.55    1.96 
   0  -1   2  107.20    1.96 
   0  -1   2  107.68    1.96 
   0  -1   2  109.46    2.02 
   1   0  -1  185.21    3.32 
   1   0  -1  187.10    3.32 
   1   0  -1  185.44    3.36 
   1   0  -1  185.01    3.31 
  -1   0   1  186.93    3.32 
  -1   0   1  186.92    3.36 
  -1   0   1  181.90    3.32 
  -1   0   1  187.82    3.32 
   2  -1   0   66.72    1.33 
   2  -1   0   66.76    1.34 
   2  -1   0   67.56    1.33 
   2  -1   0   65.63    1.33 
  -2   1   0   63.92    1.32 
  -2   1   0   67.57    1.33 
  -2   1   0   66.53    1.34 
   3  -2   1   77.10    1.64 
   3  -2   1   69.26    1.53 
   3  -2   1   71.27    1.53 
   3  -2   1   73.12    1.54 
  -3   2  -1   71.00    1.54 
  -3   2  -1   70.77    1.54 
  -3   2  -1   70.36    1.52 
   4  -3   2    1.18    0.19 
  -4   3  -2    1.39    0.22 
   5  -4   3    1.36    0.23 
  -5   4  -3    0.99    0.22 
   6  -5   4    0.03    0.15 
  -6   5  -4    0.40    0.21 
   5  -6   6    2.55    0.36 
  -4   5  -5    4.78    0.38 
   4  -5   5    4.51    0.37 
  -3   4  -4    0.04    0.10 
   3  -4   4    0.09    0.12 
   3  -4   4   -0.07    0.10 
  -2   3  -3   24.42    0.67 
  -2   3  -3   25.59    0.70 
   2  -3   3   24.31    0.67 
   2  -3   3   24.78    0.68 
   2  -3   3   24.12    0.68 
  -1   2  -2    3.89    0.17 
  -1   2  -2    3.74    0.19 
  -1   2  -2    3.77    0.18 
  -1   2  -2    4.15    0.18 
   1  -2   2    3.34    0.17 
   1  -2   2    3.88    0.18 
   1  -2   2    3.82    0.18 
   0   1  -1    9.59    0.21 
   0   1  -1    9.69    0.21 
   0   1  -1    9.50    0.23 
   0   1  -1    9.68    0.21 
   0  -1   1    9.65    0.23 
   0  -1   1    9.78    0.22 
   0  -1   1    9.77    0.22 
   1   0   0    7.39    0.19 
  -1   0   0    7.40    0.20 
  -1   0   0    7.18    0.19 
  -1   0   0    7.38    0.19 
   2  -1   1    0.81    0.10 
   2  -1   1    0.83    0.10 
   2  -1   1    1.00    0.12 
   2  -1   1    0.95    0.12 
  -2   1  -1    0.98    0.11 
  -2   1  -1    0.72    0.09 
  -2   1  -1    0.96    0.11 
   3  -2   2   21.01    0.60 
   3  -2   2   21.61    0.62 
   3  -2   2   21.20    0.61 
   3  -2   2   20.14    0.60 
  -3   2  -2   21.08    0.62 
  -3   2  -2   20.64    0.60 
   4  -3   3   11.06    0.49 
  -4   3  -3   12.22    0.52 
   5  -4   4    1.35    0.23 
  -5   4  -4    2.13    0.30 
   6  -5   5    1.97    0.32 
  -6   5  -5    1.98    0.33 
   5  -6   5    2.57    0.36 
  -4   5  -4   11.97    0.57 
   4  -5   4   12.65    0.59 
  -3   4  -3    0.79    0.17 
   3  -4   3    0.92    0.17 
   3  -4   3    1.01    0.19 
  -2   3  -2   62.14    1.45 
  -2   3  -2   61.65    1.36 
  -2   3  -2   62.29    1.37 
  -2   3  -2   62.52    1.34 
   2  -3   2   61.82    1.36 
   2  -3   2   64.44    1.37 
   2  -3   2   61.67    1.36 
  -1   2  -1    1.74    0.12 
  -1   2  -1    1.90    0.14 
   1  -2   1    1.83    0.13 
   1  -2   1    1.91    0.14 
   1  -2   1    2.16    0.14 
   0   1   0  204.79    3.66 
   0   1   0  204.88    3.65 
   0  -1   0  203.28    3.65 
   1   0   1   85.66    1.54 
   1   0   1   83.30    1.56 
   1   0   1   83.32    1.56 
   1   0   1   85.05    1.56 
  -1   0  -1   85.27    1.56 
  -1   0  -1   83.77    1.56 
  -1   0  -1   84.01    1.54 
  -1   0  -1   82.75    1.56 
  -1   0  -1   83.66    1.56 
   2  -1   2   27.87    0.66 
   2  -1   2   26.62    0.67 
   2  -1   2   28.07    0.66 
   2  -1   2   27.66    0.63 
  -2   1  -2   28.40    0.66 
  -2   1  -2   28.83    0.67 
  -2   1  -2   27.84    0.67 
  -2   1  -2   27.71    0.66 
   3  -2   3    0.46    0.13 
   3  -2   3    0.26    0.11 
   3  -2   3    0.33    0.10 
   3  -2   3    0.25    0.10 
  -3   2  -3    0.14    0.09 
  -3   2  -3    0.07    0.10 
   4  -3   4   10.14    0.48 
   4  -3   4   10.29    0.48 
  -4   3  -4    9.24    0.46 
   5  -4   5    2.84    0.32 
  -5   4  -5    3.01    0.34 
   6  -5   6    1.84    0.32 
  -5   6  -4    0.11    0.19 
   5  -6   4   -0.08    0.15 
  -4   5  -3    0.66    0.19 
   4  -5   3    0.50    0.16 
  -3   4  -2    0.19    0.13 
   3  -4   2    0.19    0.13 
   3  -4   2    0.15    0.11 
  -2   3  -1   13.43    0.45 
  -2   3  -1   13.54    0.44 
   2  -3   1   12.91    0.44 
   2  -3   1   12.77    0.44 
   2  -3   1   13.29    0.45 
  -1   2   0   19.20    0.48 
  -1   2   0   18.50    0.47 
  -1   2   0   18.61    0.47 
   1  -2   0   18.91    0.47 
   1  -2   0   19.73    0.48 
   1  -2   0   18.62    0.47 
   0   1   1  197.84    3.31 
   0   1   1  197.88    3.31 
   0   1   1  163.43    3.30 
   0  -1  -1  201.75    3.31 
   0  -1  -1  161.30    3.30 
   1   0   2    0.03    0.05 
   1   0   2    0.01    0.03 
   1   0   2   -0.02    0.04 
   1   0   2   -0.04    0.03 
  -1   0  -2   -0.01    0.03 
  -1   0  -2   -0.04    0.04 
  -1   0  -2   -0.02    0.03 
  -1   0  -2   -0.02    0.03 
   2  -1   3   11.71    0.37 
   2  -1   3   11.30    0.36 
   2  -1   3   11.57    0.38 
  -2   1  -3   11.27    0.36 
  -2   1  -3   12.02    0.38 
  -2   1  -3   12.04    0.36 
  -2   1  -3   11.56    0.36 
   3  -2   4    6.26    0.32 
   3  -2   4    6.20    0.32 
  -3   2  -4    6.18    0.31 
   4  -3   5    0.52    0.16 
   4  -3   5    1.03    0.21 
  -4   3  -5    0.65    0.17 
   5  -4   6    0.78    0.19 
  -5   4  -6    0.67    0.21 
  -5   6  -3    0.28    0.19 
   5  -6   3    0.22    0.17 
  -4   5  -2    9.62    0.52 
   4  -5   2    9.69    0.50 
  -3   4  -1    1.56    0.21 
   3  -4   1    0.80    0.16 
   3  -4   1    1.17    0.19 
  -2   3   0    0.14    0.09 
  -2   3   0    0.09    0.09 
  -2   3   0    0.09    0.07 
   2  -3   0    0.29    0.10 
   2  -3   0    0.13    0.09 
   2  -3   0    0.14    0.09 
  -1   2   1   14.84    0.41 
  -1   2   1   15.28    0.40 
  -1   2   1   15.72    0.42 
   1  -2  -1   14.94    0.40 
   1  -2  -1   14.80    0.40 
   1  -2  -1   15.16    0.41 
   0   1   2  406.63    7.38 
   0   1   2  422.17    7.51 
   0   1   2  410.27    7.37 
   0  -1  -2  402.59    7.50 
   0  -1  -2  406.99    7.39 
   0  -1  -2  418.91    7.49 
   0  -1  -2  423.64    7.59 
   1   0   3   30.07    0.67 
   1   0   3   30.98    0.67 
   1   0   3   32.01    0.67 
   1   0   3   31.93    0.71 
  -1   0  -3   31.53    0.70 
  -1   0  -3   33.22    0.67 
  -1   0  -3   31.69    0.66 
  -1   0  -3   31.72    0.66 
   2  -1   4   37.61    0.88 
   2  -1   4   39.30    0.88 
   2  -1   4   36.96    0.87 
   2  -1   4   37.79    0.91 
  -2   1  -4   37.25    0.90 
  -2   1  -4   35.32    0.84 
  -2   1  -4   37.63    0.85 
  -2   1  -4   39.85    0.86 
   3  -2   5   13.73    0.52 
   3  -2   5   13.82    0.50 
   3  -2   5   14.66    0.52 
  -3   2  -5   12.94    0.48 
   4  -3   6    1.37    0.25 
   4  -3   6    0.85    0.18 
  -4   3  -6    1.02    0.19 
   5  -4   7    1.57    0.26 
  -5   4  -7    1.53    0.34 
  -5   6  -2    0.11    0.18 
   5  -6   2    0.13    0.17 
  -4   5  -1    0.15    0.16 
   4  -5   1    0.05    0.12 
  -3   4   0    0.99    0.18 
  -3   4   0    0.79    0.17 
   3  -4   0    0.97    0.16 
  -2   3   1    0.06    0.09 
  -2   3   1    0.08    0.07 
  -2   3   1    0.08    0.09 
   2  -3  -1    0.15    0.08 
   2  -3  -1    0.20    0.12 
   2  -3  -1    0.05    0.07 
   2  -3  -1    0.18    0.08 
  -1   2   2    8.17    0.27 
   1  -2  -2    8.40    0.27 
   1  -2  -2    8.57    0.28 
   1  -2  -2    8.19    0.27 
   1  -2  -2    8.34    0.27 
   0   1   3  120.69    2.25 
   0   1   3  124.25    2.24 
   0   1   3  121.44    2.25 
   0   1   3  121.14    2.22 
   0   1   3  121.25    2.25 
   0  -1  -3  121.52    2.24 
   0  -1  -3  120.51    2.23 
   0  -1  -3  122.96    2.22 
   0  -1  -3  121.38    2.24 
   0  -1  -3  124.23    2.24 
   1   0   4   49.26    1.01 
   1   0   4   48.73    1.01 
   1   0   4   50.49    1.07 
   1   0   4   50.20    1.02 
  -1   0  -4   49.90    0.99 
  -1   0  -4   49.91    0.99 
  -1   0  -4   49.62    0.99 
   2  -1   5    9.18    0.35 
   2  -1   5    9.15    0.34 
   2  -1   5    8.68    0.37 
   2  -1   5    9.68    0.36 
  -2   1  -5    9.09    0.32 
  -2   1  -5    9.96    0.34 
  -2   1  -5   10.14    0.39 
   3  -2   6   22.66    0.70 
   3  -2   6   23.33    0.72 
   3  -2   6   22.24    0.69 
  -3   2  -6   22.01    0.66 
   4  -3   7    5.30    0.38 
  -4   3  -7    5.12    0.34 
   5  -4   8    3.07    0.36 
  -5   6  -1    0.19    0.19 
   5  -6   1    0.44    0.19 
  -4   5   0    0.42    0.18 
   4  -5   0    0.38    0.15 
  -3   4   1   31.72    1.19 
  -3   4   1   29.65    0.85 
  -3   4   1   30.26    0.88 
   3  -4  -1   29.97    0.85 
  -2   3   2   15.95    0.49 
  -2   3   2   15.57    0.50 
  -2   3   2   15.64    0.51 
   2  -3  -2   16.75    0.50 
   2  -3  -2   15.80    0.49 
   2  -3  -2   16.54    0.50 
  -1   2   3    3.55    0.19 
  -1   2   3    3.45    0.19 
  -1   2   3    3.55    0.17 
   1  -2  -3    3.78    0.19 
   1  -2  -3    3.66    0.18 
   1  -2  -3    3.71    0.17 
   1  -2  -3    3.56    0.17 
   0   1   4    0.94    0.09 
   0   1   4    1.13    0.10 
   0   1   4    0.95    0.09 
   0   1   4    1.02    0.09 
   0   1   4    0.84    0.08 
   0  -1  -4    0.87    0.08 
   0  -1  -4    0.87    0.08 
   0  -1  -4    1.06    0.09 
   0  -1  -4    1.08    0.08 
   1   0   5    0.54    0.09 
   1   0   5    0.54    0.11 
   1   0   5    0.44    0.08 
   1   0   5    0.61    0.09 
  -1   0  -5    0.49    0.07 
  -1   0  -5    0.56    0.07 
  -1   0  -5    0.48    0.07 
   2  -1   6   15.09    0.49 
   2  -1   6   15.10    0.54 
   2  -1   6   16.14    0.50 
   2  -1   6   15.73    0.50 
  -2   1  -6   15.87    0.46 
   3  -2   7   32.85    0.91 
   3  -2   7   30.91    0.89 
   3  -2   7   33.77    0.98 
   3  -2   7   32.14    0.93 
  -3   2  -7   31.86    0.85 
   4  -3   8   -0.08    0.11 
  -4   3  -8    0.16    0.13 
   5  -4   9    1.65    0.30 
  -6   7  -1    1.26    0.34 
   6  -7   1    1.00    0.27 
  -5   6   0    0.50    0.22 
   5  -6   0    0.52    0.18 
  -4   5   1    4.97    0.40 
  -4   5   1    5.73    0.41 
   4  -5  -1    5.75    0.39 
  -3   4   2    0.22    0.12 
  -3   4   2    0.13    0.12 
  -3   4   2    0.06    0.11 
   3  -4  -2    0.16    0.11 
  -2   3   3    3.27    0.22 
  -2   3   3    3.29    0.21 
  -2   3   3    3.32    0.23 
   2  -3  -3    3.73    0.22 
   2  -3  -3    3.42    0.21 
   2  -3  -3    3.14    0.21 
  -1   2   4   22.88    0.58 
  -1   2   4   23.05    0.58 
  -1   2   4   22.91    0.56 
   1  -2  -4   23.84    0.56 
   1  -2  -4   22.29    0.57 
   1  -2  -4   23.23    0.55 
   0   1   5   35.13    0.74 
   0   1   5   34.50    0.75 
   0   1   5   33.79    0.74 
   0   1   5   33.97    0.71 
   0   1   5   33.70    0.74 
   0  -1  -5   34.01    0.70 
   0  -1  -5   33.87    0.70 
   0  -1  -5   34.48    0.71 
   1   0   6    1.64    0.14 
   1   0   6    1.32    0.17 
   1   0   6    1.35    0.13 
   1   0   6    1.38    0.14 
  -1   0  -6    1.37    0.11 
  -1   0  -6    1.37    0.10 
  -1   0  -6    1.12    0.09 
  -1   0  -6    1.21    0.10 
   2  -1   7    6.73    0.32 
   2  -1   7    6.46    0.31 
   2  -1   7    6.54    0.37 
   2  -1   7    5.93    0.32 
  -2   1  -7    6.58    0.27 
   3  -2   8    2.44    0.25 
   3  -2   8    2.34    0.26 
   3  -2   8    2.76    0.34 
   3  -2   8    2.47    0.27 
  -3   2  -8    2.40    0.22 
   4  -3   9    2.00    0.28 
  -6   7   0    0.29    0.25 
   6  -7   0   -0.12    0.16 
  -5   6   1    0.64    0.22 
   5  -6  -1    0.79    0.20 
  -4   5   2    5.82    0.42 
  -4   5   2    4.90    0.39 
   4  -5  -2    5.27    0.37 
  -3   4   3   11.29    0.46 
  -3   4   3   11.14    0.49 
  -3   4   3   11.20    0.49 
   3  -4  -3   11.56    0.46 
  -2   3   4    7.25    0.32 
  -2   3   4    7.31    0.33 
   2  -3  -4    7.38    0.30 
  -1   2   5   60.46    1.25 
  -1   2   5   62.05    1.27 
  -1   2   5   59.28    1.26 
  -1   2   5   59.95    1.26 
   1  -2  -5   59.52    1.22 
   1  -2  -5   60.71    1.22 
   1  -2  -5   62.48    1.26 
   1  -2  -5   58.77    1.22 
   1  -2  -5   58.98    1.21 
   0   1   6   66.11    1.32 
   0   1   6   65.09    1.26 
   0   1   6   65.14    1.31 
   0   1   6   64.48    1.31 
   0  -1  -6   63.27    1.23 
   0  -1  -6   63.72    1.24 
   0  -1  -6   64.87    1.24 
   1   0   7    3.12    0.20 
   1   0   7    3.28    0.20 
   1   0   7    3.30    0.26 
   1   0   7    3.32    0.20 
  -1   0  -7    3.14    0.15 
  -1   0  -7    2.60    0.13 
  -1   0  -7    3.17    0.15 
   2  -1   8   13.10    0.47 
   2  -1   8   12.11    0.53 
   2  -1   8   12.43    0.46 
   2  -1   8   13.15    0.48 
  -2   1  -8   10.35    0.36 
   3  -2   9    0.08    0.17 
   3  -2   9    0.21    0.13 
   3  -2   9   -0.34    0.09 
   4  -3  10    0.35    0.15 
  -6   7   1    3.07    0.44 
   6  -7  -1    3.77    0.44 
  -5   6   2    0.13    0.18 
   5  -6  -2    0.35    0.16 
  -4   5   3    2.02    0.28 
  -4   5   3    2.01    0.28 
   4  -5  -3    1.81    0.24 
  -3   4   4    0.77    0.17 
  -3   4   4    1.06    0.19 
  -3   4   4    0.68    0.15 
   3  -4  -4    0.90    0.16 
  -2   3   5    3.25    0.23 
  -2   3   5    3.46    0.23 
  -2   3   5    2.95    0.23 
   2  -3  -5    3.42    0.21 
  -1   2   6    0.88    0.11 
  -1   2   6    0.79    0.12 
  -1   2   6    0.90    0.14 
  -1   2   6    0.73    0.11 
   1  -2  -6    1.00    0.10 
   1  -2  -6    1.06    0.11 
   1  -2  -6    0.94    0.13 
   1  -2  -6    0.95    0.10 
   0   1   7   -0.06    0.06 
   0   1   7    0.07    0.06 
   0   1   7    0.05    0.07 
   0   1   7    0.02    0.06 
   0  -1  -7    0.07    0.04 
   0  -1  -7    0.10    0.04 
   0  -1  -7    0.05    0.04 
   0  -1  -7    0.08    0.04 
   1   0   8    0.26    0.10 
   1   0   8    0.28    0.06 
   1   0   8    0.36    0.10 
   1   0   8    0.35    0.10 
   1   0   8    0.34    0.13 
  -1   0  -8    0.33    0.06 
  -1   0  -8    0.40    0.06 
  -1   0  -8    0.37    0.07 
   2  -1   9    2.83    0.27 
   2  -1   9    2.52    0.31 
   2  -1   9    2.19    0.23 
   2  -1   9    2.74    0.26 
  -2   1  -9    2.68    0.17 
  -2   1  -9    2.29    0.15 
   3  -2  10    3.96    0.43 
   3  -2  10    3.93    0.32 
   3  -2  10    3.36    0.34 
   4  -3  11    0.52    0.20 
  -6   7   2    0.01    0.22 
  -5   6   3    0.17    0.20 
  -5   6   3    0.38    0.22 
   5  -6  -3    0.47    0.17 
  -4   5   4    1.72    0.28 
  -4   5   4    1.56    0.25 
   4  -5  -4    1.39    0.22 
  -3   4   5    0.16    0.13 
  -3   4   5    0.01    0.12 
  -3   4   5    0.00    0.09 
   3  -4  -5    0.05    0.09 
  -2   3   6   11.06    0.43 
  -2   3   6   10.71    0.41 
  -2   3   6   10.01    0.42 
   2  -3  -6   10.79    0.39 
  -1   2   7    1.32    0.14 
  -1   2   7    1.52    0.16 
  -1   2   7    1.44    0.17 
  -1   2   7    1.41    0.16 
   1  -2  -7    1.70    0.12 
   1  -2  -7    1.68    0.13 
   0   1   8    4.75    0.25 
   0   1   8    4.79    0.25 
   0   1   8    4.74    0.21 
   0   1   8    5.02    0.26 
   0  -1  -8    4.74    0.15 
   1   0   9   12.81    0.34 
   1   0   9   13.45    0.46 
   1   0   9   12.57    0.45 
   1   0   9   13.22    0.58 
   1   0   9   12.75    0.46 
  -1   0  -9   13.14    0.31 
   2  -1  10    3.00    0.30 
   2  -1  10    3.30    0.37 
   2  -1  10    3.24    0.29 
   3  -2  11    1.82    0.26 
   3  -2  11    1.71    0.26 
   3  -2  11    2.30    0.36 
  -6   7   3    0.64    0.29 
  -5   6   4    0.15    0.20 
  -5   6   4    0.54    0.22 
   5  -6  -4    0.32    0.17 
  -4   5   5    1.31    0.24 
  -4   5   5    1.55    0.28 
   4  -5  -5    0.91    0.19 
  -3   4   6    6.13    0.39 
  -3   4   6    6.91    0.41 
  -3   4   6    6.25    0.36 
   3  -4  -6    6.00    0.33 
  -2   3   7    0.08    0.09 
  -2   3   7    0.02    0.11 
  -2   3   7    0.21    0.11 
   2  -3  -7    0.16    0.08 
   2  -3  -7    0.22    0.09 
  -1   2   8    1.89    0.17 
  -1   2   8    1.71    0.18 
  -1   2   8    2.03    0.20 
  -1   2   8    1.82    0.19 
   1  -2  -8    1.98    0.12 
   1  -2  -8    1.83    0.11 
   1  -2  -8    1.87    0.11 
   0   1   9    9.36    0.38 
   0   1   9    9.45    0.37 
   0   1   9    9.26    0.32 
   0   1   9    9.36    0.37 
   1   0  10   15.15    0.39 
   1   0  10   14.67    0.52 
   1   0  10   16.14    0.63 
   1   0  10   15.92    0.66 
   1   0  10   15.31    0.54 
   2  -1  11   -0.09    0.16 
   2  -1  11    0.04    0.12 
   2  -1  11    0.16    0.12 
   3  -2  12    0.41    0.25 
   3  -2  12    0.40    0.17 
   3  -2  12    0.60    0.21 
  -5   6   5    1.92    0.34 
  -5   6   5    1.66    0.31 
  -4   5   6    5.81    0.44 
  -4   5   6    6.29    0.45 
   4  -5  -6    5.68    0.38 
  -3   4   7   -0.02    0.12 
  -3   4   7    0.07    0.12 
  -3   4   7   -0.11    0.09 
   3  -4  -7   -0.05    0.05 
  -2   3   8    1.00    0.17 
  -2   3   8    1.08    0.16 
  -2   3   8    1.16    0.19 
   2  -3  -8    1.10    0.13 
   2  -3  -8    0.56    0.10 
  -1   2   9   55.85    1.24 
  -1   2   9   53.80    1.23 
  -1   2   9   55.53    1.26 
  -1   2   9   56.71    1.27 
   1  -2  -9   54.33    1.05 
   0   1  10   10.00    0.34 
   0   1  10    9.88    0.40 
   0   1  10    9.92    0.40 
   0   1  10    9.97    0.42 
   1   0  11    0.35    0.13 
   1   0  11    0.53    0.15 
   1   0  11    0.35    0.20 
   2  -1  12    0.51    0.17 
   2  -1  12    0.55    0.24 
   2  -1  12    0.45    0.16 
  -5   6   6    0.92    0.27 
  -5   6   6    1.36    0.28 
  -4   5   7    1.71    0.29 
  -4   5   7    1.66    0.28 
  -3   4   8    7.53    0.43 
  -3   4   8    7.37    0.43 
   3  -4  -8    7.36    0.35 
   3  -4  -8    7.40    0.36 
  -2   3   9    2.84    0.27 
  -2   3   9    2.35    0.23 
  -2   3   9    2.60    0.26 
   2  -3  -9    2.99    0.17 
   2  -3  -9    3.00    0.18 
  -1   2  10    0.28    0.12 
  -1   2  10    0.37    0.14 
   0   1  11    0.76    0.16 
   0   1  11    0.67    0.12 
   0   1  11    0.99    0.24 
   0   1  11    0.71    0.15 
   1   0  12    6.62    0.39 
   1   0  12    6.97    0.50 
   1   0  12    6.44    0.37 
   2  -1  13    0.04    0.12 
   2  -1  13    0.12    0.21 
   2  -1  13    0.22    0.16 
  -5   6   7    0.03    0.18 
  -5   6   7   -0.07    0.20 
  -4   5   8    0.96    0.23 
  -4   5   8    2.18    0.33 
  -3   4   9    0.11    0.15 
  -3   4   9    0.06    0.14 
  -2   3  10    2.96    0.29 
  -2   3  10    2.95    0.29 
  -1   2  11    3.45    0.27 
  -1   2  11    3.42    0.29 
   0   1  12    0.58    0.22 
   0   1  12    0.77    0.17 
   0   1  12    0.72    0.16 
   1   0  13    0.07    0.12 
   1   0  13   -0.05    0.17 
   1   0  13    0.30    0.12 
  -5   6   8    0.27    0.20 
  -5   6   8   -0.06    0.17 
  -4   5   9    0.57    0.22 
  -4   5   9    0.50    0.20 
  -3   4  10    0.95    0.21 
  -3   4  10    0.57    0.19 
  -2   3  11    0.33    0.15 
  -2   3  11    0.12    0.13 
  -1   2  12    2.42    0.27 
  -1   2  12    2.48    0.27 
   0   1  13   -0.05    0.19 
   0   1  13    0.22    0.14 
   0   1  13    0.42    0.14 
   1   0  14    0.84    0.21 
   1   0  14    0.26    0.15 
   1   0  14    0.39    0.23 
  -4   5  10    0.01    0.17 
  -4   5  10    0.02    0.16 
  -3   4  11    0.02    0.14 
  -3   4  11    0.02    0.14 
  -2   3  12    0.51    0.17 
  -2   3  12    0.46    0.17 
  -1   2  13    0.17    0.14 
  -1   2  13    0.37    0.16 
   0   1  14    0.26    0.22 
   0   1  14    0.28    0.16 
   0   1  14    0.25    0.15 
  -4   5  11   -0.22    0.15 
  -4   5  11   -0.07    0.17 
  -3   4  12    0.02    0.15 
  -3   4  12    0.05    0.15 
  -2   3  13   -0.11    0.14 
  -2   3  13    0.15    0.15 
  -1   2  14    2.33    0.29 
  -1   2  14    1.91    0.27 
  -4   2  12    1.05    0.21 
  -4   2  12    1.26    0.23 
  -2   0  13    0.61    0.25 
  -2   0  13    0.31    0.14 
  -2   0  13    0.31    0.14 
  -3   1  12   -0.01    0.16 
  -3   1  12   -0.06    0.11 
  -3   1  12    0.03    0.11 
  -4   2  11    0.13    0.14 
  -4   2  11   -0.22    0.15 
  -4   2  11    0.20    0.14 
  -5   3  10    0.03    0.15 
  -5   3  10    0.08    0.15 
  -1  -1  13    0.18    0.11 
  -1  -1  13    0.13    0.20 
  -1  -1  13   -0.05    0.10 
  -2   0  12    0.16    0.14 
  -2   0  12   -0.05    0.09 
  -2   0  12    0.03    0.10 
  -3   1  11    8.01    0.39 
  -3   1  11    7.66    0.39 
  -3   1  11    8.05    0.46 
  -4   2  10   -0.12    0.16 
  -4   2  10    0.25    0.14 
  -4   2  10    0.37    0.14 
  -5   3   9   -0.02    0.14 
  -5   3   9    0.31    0.18 
  -6   4   8    0.15    0.20 
  -6   4   8   -0.14    0.16 
   0  -2  13    2.31    0.39 
   0  -2  13    2.27    0.24 
   0  -2  13    1.86    0.23 
  -1  -1  12    0.02    0.09 
  -1  -1  12    0.05    0.09 
  -1  -1  12   -0.05    0.16 
  -2   0  11    0.44    0.12 
  -2   0  11    0.32    0.14 
  -2   0  11    0.34    0.11 
  -3   1  10   12.57    0.49 
  -3   1  10   14.14    0.51 
  -3   1  10   13.71    0.57 
  -4   2   9    0.03    0.13 
  -4   2   9    0.14    0.12 
  -4   2   9    0.16    0.17 
  -5   3   8    3.39    0.35 
  -5   3   8    3.50    0.35 
  -6   4   7    0.07    0.16 
  -6   4   7    0.03    0.17 
   0  -2  12    1.10    0.17 
   0  -2  12    1.43    0.20 
   0  -2  12    0.92    0.26 
  -1  -1  11    0.78    0.16 
  -1  -1  11    0.57    0.21 
  -1  -1  11    0.51    0.11 
  -1  -1  11    0.77    0.14 
  -2   0  10    1.29    0.16 
  -2   0  10    1.36    0.21 
  -2   0  10    1.29    0.15 
  -3   1   9    3.64    0.35 
  -3   1   9    3.67    0.26 
  -3   1   9    3.34    0.23 
  -3   1   9    3.43    0.26 
  -4   2   8    1.57    0.21 
  -4   2   8    2.38    0.30 
  -4   2   8    2.38    0.24 
  -5   3   7    6.40    0.43 
  -5   3   7    6.44    0.43 
  -6   4   6    1.05    0.28 
  -6   4   6    1.24    0.28 
   1  -3  12    0.53    0.17 
   1  -3  12    0.94    0.18 
   1  -3  12    0.57    0.26 
   0  -2  11    1.31    0.26 
   0  -2  11    1.42    0.19 
   0  -2  11    1.07    0.16 
  -1  -1  10    5.17    0.26 
  -1  -1  10    5.72    0.40 
  -1  -1  10    5.12    0.25 
  -1  -1  10    5.08    0.29 
  -2   0   9    0.44    0.11 
  -2   0   9    0.50    0.16 
  -2   0   9    0.47    0.10 
  -2   0   9    0.37    0.10 
  -3   1   8   30.37    0.80 
  -3   1   8   29.72    0.77 
  -3   1   8   31.34    0.80 
  -3   1   8   30.87    0.89 
   4  -2  -7    0.42    0.09 
   4  -2  -7    0.26    0.08 
  -4   2   7    0.27    0.13 
  -4   2   7    0.62    0.13 
  -4   2   7    0.24    0.13 
  -4   2   7    0.40    0.19 
  -5   3   6    4.81    0.38 
  -5   3   6    4.92    0.38 
  -6   4   5    0.17    0.18 
  -6   4   5    0.06    0.18 
  -7   5   4    0.36    0.25 
   1  -3  11    0.17    0.13 
   1  -3  11   -0.06    0.09 
   1  -3  11    0.06    0.18 
   0  -2  10    1.40    0.18 
   0  -2  10    1.70    0.18 
   0  -2  10    1.64    0.26 
  -1  -1   9    0.45    0.12 
  -1  -1   9    0.35    0.09 
  -1  -1   9    0.27    0.17 
  -1  -1   9    0.41    0.10 
  -1  -1   9    0.21    0.08 
  -2   0   8   29.48    0.70 
  -2   0   8   29.17    0.69 
  -2   0   8   29.86    0.80 
  -2   0   8   28.95    0.68 
  -3   1   7    4.13    0.31 
  -3   1   7    3.57    0.24 
  -3   1   7    3.69    0.24 
  -3   1   7    3.53    0.22 
   4  -2  -6    1.68    0.16 
  -4   2   6    1.12    0.19 
  -4   2   6    2.21    0.24 
  -4   2   6    0.90    0.22 
  -4   2   6    1.67    0.20 
   5  -3  -5   11.63    0.47 
  -5   3   5   11.68    0.55 
  -5   3   5   10.47    0.52 
  -6   4   4    0.81    0.25 
  -7   5   3    2.52    0.40 
   2  -4  11   -0.08    0.11 
   1  -3  10    0.05    0.10 
   1  -3  10    0.13    0.16 
   1  -3  10   -0.06    0.11 
   0  -2   9    1.98    0.19 
   0  -2   9    2.14    0.20 
   0  -2   9    1.74    0.26 
   0  -2   9    2.01    0.18 
  -1  -1   8    0.02    0.06 
  -1  -1   8   -0.09    0.08 
  -1  -1   8    0.11    0.06 
  -1  -1   8   -0.04    0.05 
  -2   0   7    3.72    0.18 
  -2   0   7    3.94    0.19 
  -2   0   7    4.01    0.19 
  -2   0   7    3.67    0.26 
   3  -1  -6    2.91    0.10 
   3  -1  -6    2.92    0.11 
   3  -1  -6    2.86    0.13 
  -3   1   6    2.86    0.21 
  -3   1   6    3.51    0.30 
  -3   1   6    3.17    0.22 
  -3   1   6    2.78    0.19 
   4  -2  -5    5.68    0.27 
  -4   2   5    5.47    0.34 
  -4   2   5    5.17    0.32 
  -4   2   5    5.50    0.39 
  -4   2   5    4.89    0.30 
   5  -3  -4    8.95    0.43 
  -5   3   4    9.86    0.50 
  -5   3   4    9.01    0.46 
  -5   3   4    9.02    0.48 
   6  -4  -3    0.09    0.13 
  -6   4   3    0.16    0.18 
  -7   5   2    0.04    0.21 
   2  -4  10    0.06    0.12 
   1  -3   9    8.67    0.39 
   1  -3   9    8.65    0.50 
   1  -3   9    8.03    0.40 
   0  -2   8    0.01    0.06 
   0  -2   8    0.01    0.06 
   0  -2   8   -0.15    0.06 
   0  -2   8   -0.03    0.13 
  -1  -1   7    6.03    0.21 
  -1  -1   7    5.89    0.21 
  -1  -1   7    5.71    0.21 
  -2   0   6   28.69    0.64 
  -2   0   6   28.22    0.63 
  -2   0   6   27.17    0.74 
  -2   0   6   29.08    0.64 
   3  -1  -5    3.93    0.17 
   3  -1  -5    3.50    0.16 
  -3   1   5    3.87    0.22 
  -3   1   5    3.22    0.26 
  -3   1   5    3.23    0.20 
  -3   1   5    3.28    0.21 
   4  -2  -4    1.96    0.18 
  -4   2   4    1.80    0.21 
  -4   2   4    1.97    0.20 
  -4   2   4    1.85    0.26 
  -4   2   4    1.76    0.22 
   5  -3  -3    1.03    0.19 
  -5   3   3    1.12    0.22 
  -5   3   3    0.82    0.18 
  -5   3   3    0.77    0.20 
   6  -4  -2    0.28    0.14 
  -6   4   2    0.38    0.21 
  -7   5   1    0.46    0.25 
   3  -5  10    0.61    0.21 
   2  -4   9    1.33    0.21 
   1  -3   8    0.56    0.20 
   1  -3   8    0.91    0.16 
   1  -3   8    0.55    0.13 
   1  -3   8    0.69    0.14 
   0  -2   7    0.46    0.09 
   0  -2   7    0.48    0.09 
   0  -2   7    0.53    0.09 
   0  -2   7    0.45    0.15 
  -1  -1   6    0.22    0.05 
  -1  -1   6    0.32    0.05 
  -1  -1   6    0.29    0.05 
  -2   0   5  131.86    2.47 
  -2   0   5  134.08    2.47 
  -2   0   5  134.93    2.46 
  -2   0   5  131.21    2.59 
   3  -1  -4    0.24    0.06 
   3  -1  -4    0.26    0.07 
  -3   1   4    0.22    0.07 
  -3   1   4    0.07    0.08 
  -3   1   4    0.31    0.09 
  -3   1   4    0.04    0.11 
   4  -2  -3    0.13    0.09 
  -4   2   3    0.05    0.13 
  -4   2   3    0.16    0.11 
  -4   2   3    0.10    0.10 
  -4   2   3    0.09    0.09 
   5  -3  -2   15.27    0.59 
  -5   3   2   15.33    0.63 
  -5   3   2   14.84    0.63 
   6  -4  -1    1.43    0.24 
  -6   4   1    1.46    0.30 
   7  -5   0   -0.10    0.16 
  -7   5   0    0.07    0.21 
   3  -5   9   -0.05    0.13 
   2  -4   8    4.58    0.33 
  -1   3  -7    1.25    0.09 
  -1   3  -7    1.33    0.09 
   1  -3   7    1.45    0.17 
   1  -3   7    1.45    0.22 
   1  -3   7    1.18    0.16 
   1  -3   7    1.22    0.17 
   0  -2   6    2.98    0.17 
   0  -2   6    3.11    0.23 
   0  -2   6    2.69    0.15 
   0  -2   6    3.10    0.16 
  -1  -1   5   21.69    0.45 
  -1  -1   5   21.92    0.44 
  -1  -1   5   21.97    0.45 
  -1  -1   5   22.06    0.45 
  -2   0   4    2.67    0.13 
  -2   0   4    2.70    0.13 
  -2   0   4    2.48    0.13 
  -2   0   4    2.46    0.18 
   3  -1  -3   59.07    1.21 
   3  -1  -3   61.62    1.23 
  -3   1   3   58.61    1.26 
  -3   1   3   57.97    1.32 
  -3   1   3   58.39    1.24 
  -3   1   3   58.61    1.26 
   4  -2  -2   72.12    1.54 
  -4   2   2   70.77    1.56 
  -4   2   2   69.84    1.56 
  -4   2   2   69.63    1.58 
   5  -3  -1    4.49    0.33 
  -5   3   1    5.36    0.39 
   6  -4   0    2.72    0.32 
  -6   4   0    3.28    0.37 
   7  -5   1    0.16    0.17 
  -7   5  -1    0.19    0.23 
   3  -5   8    0.19    0.14 
  -2   4  -7    4.35    0.24 
   2  -4   7    4.85    0.33 
   2  -4   7    4.03    0.30 
  -1   3  -6   -0.05    0.04 
  -1   3  -6    0.10    0.06 
   1  -3   6    0.24    0.11 
   1  -3   6   -0.04    0.07 
   1  -3   6    0.19    0.09 
   1  -3   6   -0.04    0.10 
   0  -2   5    1.12    0.10 
   0  -2   5    1.24    0.10 
   0  -2   5    1.02    0.10 
   0  -2   5    1.28    0.15 
  -1  -1   4    6.00    0.14 
  -1  -1   4    6.10    0.14 
   2   0  -3    1.05    0.07 
   2   0  -3    1.03    0.06 
   2   0  -3    1.07    0.06 
  -2   0   3    1.12    0.09 
  -2   0   3    0.88    0.08 
  -2   0   3    0.76    0.08 
  -2   0   3    1.41    0.15 
   3  -1  -2    0.32    0.08 
   3  -1  -2    0.22    0.07 
   3  -1  -2    0.55    0.12 
   3  -1  -2    0.28    0.08 
  -3   1   2    0.27    0.07 
  -3   1   2    0.29    0.11 
  -3   1   2    0.22    0.09 
  -3   1   2    0.24    0.08 
   4  -2  -1    8.87    0.38 
  -4   2   1    9.08    0.41 
  -4   2   1    9.32    0.39 
   5  -3   0   11.88    0.53 
  -5   3   0   13.63    0.59 
   6  -4   1   -0.10    0.12 
  -6   4  -1   -0.18    0.15 
   7  -5   2    1.08    0.26 
  -7   5  -2    0.10    0.21 
   4  -6   8    0.51    0.20 
   3  -5   7    0.12    0.13 
  -2   4  -6    0.81    0.14 
   2  -4   6    0.65    0.15 
   2  -4   6    0.74    0.17 
   2  -4   6    1.05    0.19 
  -1   3  -5    0.51    0.08 
  -1   3  -5    0.47    0.08 
   1  -3   5    0.50    0.10 
   1  -3   5    0.63    0.14 
   1  -3   5    0.40    0.10 
   0   2  -4   22.50    0.44 
   0  -2   4   22.69    0.51 
   0  -2   4   22.43    0.51 
   0  -2   4   22.71    0.59 
   0  -2   4   22.56    0.51 
  -1  -1   3   76.92    1.54 
   2   0  -2   29.66    0.60 
   2   0  -2   28.70    0.60 
   2   0  -2   29.24    0.68 
   2   0  -2   29.21    0.60 
  -2   0   2   29.43    0.62 
  -2   0   2   29.02    0.62 
  -2   0   2   29.07    0.62 
  -2   0   2   29.02    0.68 
   3  -1  -1    0.00    0.06 
   3  -1  -1   -0.06    0.05 
   3  -1  -1   -0.07    0.05 
   3  -1  -1    0.13    0.08 
  -3   1   1   -0.04    0.07 
  -3   1   1    0.03    0.06 
  -3   1   1    0.07    0.07 
  -3   1   1   -0.07    0.08 
   4  -2   0    4.53    0.28 
  -4   2   0    4.66    0.30 
  -4   2   0    4.44    0.27 
   5  -3   1    9.63    0.48 
  -5   3  -1    9.43    0.50 
   6  -4   2    0.44    0.18 
  -6   4  -2    0.42    0.20 
   7  -5   3    0.72    0.23 
  -7   5  -3    1.10    0.29 
   4  -6   7   -0.10    0.13 
  -3   5  -6   -0.07    0.10 
   3  -5   6    0.21    0.14 
  -2   4  -5   12.10    0.44 
   2  -4   5   12.88    0.50 
   2  -4   5   12.63    0.49 
   2  -4   5   12.28    0.49 
  -1   3  -4   18.48    0.48 
  -1   3  -4   18.60    0.48 
  -1   3  -4   18.61    0.55 
   1  -3   4   17.86    0.51 
   1  -3   4   18.09    0.51 
   1  -3   4   17.56    0.51 
   0   2  -3   78.96    1.47 
   0   2  -3   81.40    1.48 
   0   2  -3   80.22    1.58 
   0  -2   3   79.25    1.51 
   0  -2   3   78.77    1.58 
   0  -2   3   80.97    1.51 
   0  -2   3   79.62    1.52 
  -1  -1   2  557.40   10.40 
   2   0  -1    0.65    0.10 
   2   0  -1    0.62    0.07 
   2   0  -1    0.61    0.07 
  -2   0   1    0.63    0.08 
  -2   0   1    0.68    0.11 
  -2   0   1    0.55    0.07 
  -2   0   1    0.61    0.08 
   3  -1   0   26.00    0.66 
   3  -1   0   26.29    0.66 
   3  -1   0   25.55    0.66 
  -3   1   0   25.59    0.67 
  -3   1   0   26.36    0.68 
  -3   1   0   25.45    0.66 
   4  -2   1   14.53    0.51 
  -4   2  -1   13.82    0.50 
  -4   2  -1   13.82    0.52 
   5  -3   2    2.63    0.28 
  -5   3  -2    2.94    0.33 
   6  -4   3    0.99    0.24 
  -6   4  -3    0.30    0.19 
   7  -5   4    0.42    0.21 
  -7   5  -4    0.37    0.24 
   4  -6   6    0.28    0.18 
  -3   5  -5    2.06    0.25 
   3  -5   5    1.67    0.24 
  -2   4  -4    2.07    0.20 
   2  -4   4    2.14    0.22 
   2  -4   4    2.15    0.22 
   2  -4   4    2.46    0.23 
  -1   3  -3   22.87    0.57 
  -1   3  -3   22.57    0.57 
  -1   3  -3   22.66    0.61 
  -1   3  -3   22.05    0.57 
   1  -3   3   23.19    0.60 
   1  -3   3   22.19    0.59 
   1  -3   3   22.56    0.59 
   0   2  -2   22.27    0.47 
   0   2  -2   22.55    0.52 
   0   2  -2   23.02    0.47 
   0   2  -2   22.60    0.47 
   0  -2   2   22.47    0.49 
   0  -2   2   22.18    0.49 
   0  -2   2   22.13    0.52 
   0  -2   2   22.39    0.49 
  -1  -1   1   62.31    1.12 
   2   0   0  140.91    2.57 
   2   0   0  140.15    2.57 
   2   0   0  139.35    2.59 
   2   0   0  138.50    2.57 
  -2   0   0  139.75    2.58 
  -2   0   0  136.85    2.58 
  -2   0   0  140.13    2.59 
  -2   0   0  137.00    2.57 
   3  -1   1  457.97    8.28 
   3  -1   1  454.71    8.28 
   3  -1   1  465.25    8.28 
   3  -1   1  445.85    8.28 
  -3   1  -1  455.43    8.29 
  -3   1  -1  457.82    8.28 
  -3   1  -1  462.44    8.30 
   4  -2   2    0.51    0.15 
   4  -2   2    0.43    0.13 
  -4   2  -2    0.40    0.14 
   5  -3   3    0.29    0.15 
  -5   3  -3    0.55    0.19 
   6  -4   4    5.48    0.44 
  -6   4  -4    5.53    0.46 
  -4   6  -5    0.05    0.16 
   4  -6   5    0.12    0.14 
  -3   5  -4    0.48    0.16 
   3  -5   4    0.53    0.18 
   3  -5   4    0.47    0.16 
  -2   4  -3    2.35    0.22 
   2  -4   3    1.92    0.20 
   2  -4   3    2.35    0.23 
   2  -4   3    2.22    0.22 
  -1   3  -2   11.63    0.36 
  -1   3  -2   11.30    0.37 
  -1   3  -2   11.68    0.37 
  -1   3  -2   11.93    0.37 
   1  -3   2   11.43    0.37 
   1  -3   2   10.48    0.36 
   1  -3   2   11.76    0.37 
   0   2  -1   -0.07    0.03 
   0   2  -1   -0.02    0.05 
   0   2  -1   -0.03    0.04 
   0   2  -1   -0.07    0.02 
   0  -2   1    0.05    0.05 
   0  -2   1   -0.06    0.04 
   0  -2   1   -0.06    0.04 
   1   1   0    0.53    0.06 
   1   1   0    0.83    0.06 
   1   1   0    0.81    0.06 
  -1  -1   0    0.96    0.07 
  -1  -1   0    0.88    0.07 
  -1  -1   0    0.80    0.06 
   2   0   1  971.79   17.71 
   2   0   1  967.90   17.77 
   2   0   1  962.17   17.44 
   2   0   1  994.86   17.39 
  -2   0  -1  914.82   17.46 
  -2   0  -1  998.61   17.75 
  -2   0  -1  932.92   17.61 
  -2   0  -1 1000.00   17.73 
   3  -1   2   17.91    0.51 
   3  -1   2   18.30    0.53 
  -3   1  -2   17.83    0.53 
  -3   1  -2   17.77    0.53 
  -3   1  -2   18.63    0.53 
   4  -2   3    0.15    0.12 
   4  -2   3   -0.10    0.08 
  -4   2  -3    0.12    0.12 
   5  -3   4    1.17    0.22 
  -5   3  -4    0.75    0.20 
   6  -4   5   -0.09    0.14 
  -6   4  -5   -0.08    0.16 
  -4   6  -4    2.22    0.31 
   4  -6   4    2.41    0.31 
  -3   5  -3    3.94    0.32 
   3  -5   3    4.19    0.34 
   3  -5   3    3.57    0.33 
  -2   4  -2    9.92    0.41 
   2  -4   2   10.02    0.41 
   2  -4   2   10.54    0.42 
   2  -4   2   10.52    0.42 
  -1   3  -1   21.20    0.55 
  -1   3  -1   20.75    0.54 
  -1   3  -1   20.40    0.54 
   1  -3   1   21.92    0.56 
   1  -3   1   21.24    0.56 
   1  -3   1   21.28    0.56 
   0   2   0  281.58    5.19 
   0   2   0  298.43    5.19 
   0   2   0  287.89    5.19 
   0  -2   0  286.41    5.19 
   0  -2   0  289.54    5.19 
   0  -2   0  289.37    5.19 
   1   1   1  322.81    6.04 
   1   1   1  326.94    6.02 
   1   1   1  331.89    6.04 
   1   1   1  325.14    5.85 
  -1  -1  -1  334.54    6.02 
  -1  -1  -1  325.18    6.03 
  -1  -1  -1  329.40    6.02 
  -1  -1  -1  329.29    5.94 
   2   0   2   25.47    0.59 
   2   0   2   25.40    0.60 
   2   0   2   23.94    0.58 
   2   0   2   24.90    0.55 
  -2   0  -2   25.79    0.59 
  -2   0  -2   25.41    0.59 
  -2   0  -2   23.97    0.58 
  -2   0  -2   25.19    0.58 
   3  -1   3   61.99    1.37 
   3  -1   3   65.00    1.39 
   3  -1   3   63.13    1.37 
   3  -1   3   62.33    1.31 
  -3   1  -3   64.00    1.37 
  -3   1  -3   63.34    1.38 
  -3   1  -3   62.10    1.35 
  -3   1  -3   62.01    1.36 
   4  -2   4    1.69    0.22 
   4  -2   4    2.28    0.26 
  -4   2  -4    2.01    0.24 
   5  -3   5    0.08    0.13 
  -5   3  -5    0.13    0.15 
   6  -4   6    0.08    0.16 
  -6   4  -6    0.11    0.19 
   5  -7   4    2.33    0.36 
  -4   6  -3    6.96    0.46 
   4  -6   3    6.62    0.45 
  -3   5  -2   -0.09    0.12 
   3  -5   2    0.04    0.11 
  -2   4  -1   18.17    0.58 
   2  -4   1   18.11    0.57 
   2  -4   1   17.48    0.57 
   2  -4   1   17.92    0.57 
  -1   3   0   38.13    0.85 
  -1   3   0   36.55    0.85 
  -1   3   0   37.48    0.85 
   1  -3   0   37.81    0.85 
   1  -3   0   37.77    0.86 
   1  -3   0   36.93    0.85 
   0   2   1   -0.10    0.05 
   0   2   1   -0.13    0.04 
   0   2   1   -0.06    0.04 
   0  -2  -1   -0.12    0.04 
   0  -2  -1    0.03    0.05 
   0  -2  -1   -0.05    0.04 
   1   1   2   33.36    0.67 
   1   1   2   32.62    0.67 
   1   1   2   32.73    0.67 
   1   1   2   31.29    0.67 
  -1  -1  -2   32.58    0.67 
  -1  -1  -2   33.45    0.67 
  -1  -1  -2   32.54    0.67 
   2   0   3   44.73    0.99 
   2   0   3   47.48    1.00 
   2   0   3   46.62    0.93 
   2   0   3   46.83    1.01 
   2   0   3   47.84    1.01 
  -2   0  -3   47.76    1.01 
  -2   0  -3   47.35    0.99 
  -2   0  -3   47.44    1.00 
  -2   0  -3   47.41    1.00 
   3  -1   4    6.80    0.31 
   3  -1   4    6.30    0.27 
   3  -1   4    6.12    0.31 
  -3   1  -4    6.38    0.31 
  -3   1  -4    6.38    0.30 
   4  -2   5    1.36    0.20 
  -4   2  -5    0.83    0.17 
   5  -3   6    1.81    0.28 
  -5   3  -6    2.07    0.28 
   6  -4   7   -0.08    0.14 
  -5   7  -3    1.09    0.29 
   5  -7   3    1.74    0.31 
  -4   6  -2    1.27    0.25 
   4  -6   2    1.52    0.26 
  -3   5  -1    1.20    0.22 
   3  -5   1    0.71    0.17 
  -2   4   0   22.18    0.67 
  -2   4   0   22.73    0.66 
  -2   4   0   22.57    0.65 
   2  -4   0   22.32    0.66 
   2  -4   0   22.92    0.66 
   2  -4   0   22.55    0.66 
  -1   3   1   71.65    1.47 
  -1   3   1   71.80    1.46 
  -1   3   1   71.28    1.46 
   1  -3  -1   71.85    1.46 
   1  -3  -1   70.43    1.46 
   1  -3  -1   71.44    1.46 
   0   2   2    7.30    0.23 
   0   2   2    7.29    0.24 
   0   2   2    6.62    0.23 
   0  -2  -2    6.66    0.23 
   0  -2  -2    7.14    0.23 
   1   1   3   61.98    1.22 
   1   1   3   62.73    1.22 
   1   1   3   62.49    1.22 
  -1  -1  -3   61.00    1.21 
  -1  -1  -3   63.19    1.22 
  -1  -1  -3   62.15    1.21 
   2   0   4   18.83    0.50 
   2   0   4   19.46    0.42 
   2   0   4   18.69    0.53 
   2   0   4   18.18    0.51 
   2   0   4   18.64    0.51 
  -2   0  -4   18.21    0.49 
  -2   0  -4   19.60    0.50 
  -2   0  -4   19.12    0.50 
  -2   0  -4   18.68    0.52 
   3  -1   5   17.72    0.57 
   3  -1   5   17.99    0.49 
   3  -1   5   17.18    0.57 
   3  -1   5   18.40    0.57 
  -3   1  -5   18.85    0.56 
   4  -2   6    0.30    0.14 
  -4   2  -6    0.14    0.12 
   5  -3   7    1.19    0.22 
  -5   3  -7    0.92    0.22 
   6  -4   8    0.70    0.25 
  -5   7  -2    1.65    0.32 
   5  -7   2    0.91    0.25 
  -4   6  -1    0.67    0.21 
   4  -6   1    0.53    0.18 
  -3   5   0   23.26    0.75 
  -3   5   0   23.35    0.77 
   3  -5   0   22.43    0.75 
  -2   4   1   23.15    0.68 
  -2   4   1   23.62    0.69 
  -2   4   1   23.85    0.67 
   2  -4  -1   23.06    0.68 
   2  -4  -1   23.70    0.68 
  -1   3   2   10.90    0.35 
   1  -3  -2   10.30    0.35 
   1  -3  -2   10.40    0.34 
   1  -3  -2    9.98    0.35 
   0   2   3   12.44    0.33 
   0   2   3   11.06    0.33 
   0   2   3   10.90    0.32 
   0  -2  -3   10.86    0.31 
   0  -2  -3   10.69    0.31 
   0  -2  -3   11.12    0.32 
   0  -2  -3   11.13    0.32 
   1   1   4   12.31    0.35 
   1   1   4   13.53    0.36 
   1   1   4   12.74    0.36 
  -1  -1  -4   13.42    0.35 
  -1  -1  -4   12.91    0.34 
  -1  -1  -4   13.30    0.35 
   2   0   5    3.74    0.21 
   2   0   5    3.68    0.20 
   2   0   5    3.74    0.21 
   2   0   5    3.69    0.23 
  -2   0  -5    4.03    0.20 
  -2   0  -5    3.86    0.20 
  -2   0  -5    3.14    0.18 
  -2   0  -5    3.41    0.22 
   3  -1   6   13.13    0.49 
   3  -1   6   13.96    0.54 
   3  -1   6   13.82    0.41 
   3  -1   6   13.25    0.50 
   3  -1   6   14.21    0.51 
  -3   1  -6   13.99    0.48 
   4  -2   7    1.75    0.25 
   4  -2   7    1.65    0.23 
  -4   2  -7    1.79    0.23 
   5  -3   8    0.56    0.19 
  -5   7  -1    4.05    0.46 
   5  -7   1    3.71    0.41 
  -4   6   0    0.02    0.17 
   4  -6   0   -0.15    0.13 
  -3   5   1    6.37    0.40 
  -3   5   1    8.21    0.44 
   3  -5  -1    7.26    0.39 
  -2   4   2   13.68    0.49 
  -2   4   2   13.53    0.47 
  -2   4   2   12.62    0.48 
   2  -4  -2   13.84    0.48 
   2  -4  -2   13.15    0.47 
  -1   3   3   42.70    0.97 
  -1   3   3   43.07    0.96 
  -1   3   3   41.65    0.97 
   1  -3  -3   42.26    0.96 
   1  -3  -3   42.21    0.96 
   1  -3  -3   43.29    0.96 
   1  -3  -3   43.34    0.96 
   0   2   4   73.04    1.42 
   0   2   4   72.32    1.43 
   0   2   4   68.06    1.42 
   0  -2  -4   70.66    1.41 
   0  -2  -4   72.87    1.41 
   0  -2  -4   72.02    1.38 
   0  -2  -4   71.55    1.41 
   1   1   5   57.59    1.18 
   1   1   5   56.11    1.17 
   1   1   5   57.32    1.18 
  -1  -1  -5   57.46    1.15 
  -1  -1  -5   57.23    1.15 
  -1  -1  -5   56.79    1.14 
  -1  -1  -5   56.96    1.15 
   2   0   6    3.50    0.24 
   2   0   6    3.17    0.20 
   2   0   6    3.77    0.23 
   2   0   6    3.28    0.21 
  -2   0  -6    4.02    0.20 
  -2   0  -6    3.59    0.20 
   3  -1   7    0.17    0.11 
   3  -1   7    0.00    0.09 
   3  -1   7    0.05    0.12 
   3  -1   7   -0.14    0.08 
   3  -1   7   -0.10    0.12 
  -3   1  -7   -0.01    0.08 
   4  -2   8    0.49    0.18 
   4  -2   8    0.30    0.14 
  -4   2  -8    0.29    0.13 
   5  -3   9    1.55    0.28 
  -5   7   0    1.07    0.29 
   5  -7   0    1.49    0.28 
  -4   6   1    0.30    0.19 
  -4   6   1    0.15    0.17 
   4  -6  -1    0.27    0.15 
  -3   5   2   67.16    1.63 
  -3   5   2   70.94    1.66 
   3  -5  -2   69.71    1.62 
  -2   4   3    4.12    0.26 
  -2   4   3    4.08    0.27 
   2  -4  -3    3.97    0.25 
  -1   3   4   14.79    0.45 
  -1   3   4   15.24    0.47 
  -1   3   4   14.59    0.47 
   1  -3  -4   15.33    0.46 
   1  -3  -4   15.39    0.45 
   1  -3  -4   14.99    0.45 
   1  -3  -4   15.11    0.45 
   0   2   5    0.47    0.08 
   0   2   5    0.48    0.09 
   0   2   5    0.67    0.10 
   0  -2  -5    0.85    0.10 
   0  -2  -5    0.69    0.09 
   0  -2  -5    0.56    0.08 
   0  -2  -5    0.71    0.09 
   0  -2  -5    0.69    0.09 
   1   1   6    6.93    0.28 
   1   1   6    6.83    0.17 
   1   1   6    7.12    0.28 
   1   1   6    6.94    0.27 
  -1  -1  -6    7.05    0.24 
  -1  -1  -6    7.03    0.24 
  -1  -1  -6    6.86    0.24 
  -1  -1  -6    7.05    0.24 
   2   0   7   17.34    0.54 
   2   0   7   18.11    0.55 
   2   0   7   17.72    0.54 
   2   0   7   17.30    0.60 
  -2   0  -7   17.75    0.49 
   3  -1   8    8.36    0.46 
   3  -1   8    8.71    0.42 
   3  -1   8    8.78    0.42 
   3  -1   8    8.85    0.44 
   3  -1   8    8.53    0.31 
  -3   1  -8    8.26    0.36 
   4  -2   9   11.62    0.56 
   4  -2   9   11.31    0.58 
   5  -3  10    0.03    0.15 
  -5   7   1    0.26    0.22 
   5  -7  -1    0.55    0.20 
  -4   6   2    1.19    0.26 
  -4   6   2    1.18    0.25 
   4  -6  -2    0.93    0.21 
  -3   5   3   -0.06    0.13 
  -3   5   3    0.08    0.15 
   3  -5  -3    0.09    0.12 
  -2   4   4    1.49    0.20 
  -2   4   4    1.65    0.19 
  -2   4   4    1.45    0.19 
   2  -4  -4    1.49    0.17 
  -1   3   5    4.01    0.24 
  -1   3   5    4.43    0.23 
  -1   3   5    4.18    0.24 
   1  -3  -5    4.43    0.22 
   1  -3  -5    4.29    0.23 
   1  -3  -5    4.36    0.22 
   0   2   6   36.04    0.83 
   0   2   6   34.80    0.81 
   0   2   6   35.51    0.82 
   0   2   6   34.07    0.82 
   0  -2  -6   35.05    0.78 
   0  -2  -6   37.35    0.79 
   0  -2  -6   35.44    0.78 
   0  -2  -6   35.49    0.76 
   0  -2  -6   36.05    0.78 
   1   1   7    0.10    0.04 
   1   1   7    0.10    0.07 
   1   1   7    0.05    0.07 
   1   1   7    0.20    0.07 
   1   1   7    0.05    0.10 
  -1  -1  -7    0.10    0.06 
  -1  -1  -7    0.07    0.06 
  -1  -1  -7    0.03    0.04 
   2   0   8    7.17    0.35 
   2   0   8    7.32    0.34 
   2   0   8    6.98    0.33 
   2   0   8    6.87    0.39 
  -2   0  -8    6.99    0.28 
   3  -1   9    0.37    0.15 
   3  -1   9    0.21    0.12 
   3  -1   9    0.38    0.18 
  -3   1  -9    0.47    0.12 
   4  -2  10    2.57    0.33 
   4  -2  10    1.85    0.27 
  -5   7   2    0.10    0.21 
   5  -7  -2    0.09    0.15 
  -4   6   3    0.73    0.22 
  -4   6   3    0.68    0.22 
   4  -6  -3    0.36    0.16 
  -3   5   4    0.26    0.16 
  -3   5   4    0.29    0.16 
  -3   5   4    0.24    0.14 
   3  -5  -4    0.58    0.15 
  -2   4   5    2.06    0.23 
  -2   4   5    2.73    0.25 
  -2   4   5    1.37    0.19 
   2  -4  -5    1.92    0.20 
  -1   3   6    6.14    0.30 
  -1   3   6    6.10    0.28 
  -1   3   6    6.20    0.30 
   1  -3  -6    6.11    0.27 
   1  -3  -6    5.95    0.28 
   0   2   7    3.56    0.21 
   0   2   7    3.41    0.20 
   0   2   7    3.60    0.22 
   0   2   7    4.10    0.23 
   0  -2  -7    3.31    0.17 
   0  -2  -7    3.76    0.18 
   0  -2  -7    3.57    0.18 
   1   1   8    0.00    0.07 
   1   1   8    0.02    0.04 
   1   1   8    0.00    0.07 
   1   1   8    0.01    0.07 
   1   1   8   -0.18    0.09 
  -1  -1  -8    0.00    0.03 
  -1  -1  -8    0.00    0.05 
  -1  -1  -8    0.01    0.06 
   2   0   9   -0.04    0.03 
   2   0   9   -0.05    0.13 
   2   0   9   -0.01    0.09 
   2   0   9   -0.06    0.09 
   2   0   9    0.08    0.12 
  -2   0  -9   -0.07    0.06 
  -2   0  -9    0.00    0.03 
   3  -1  10   -0.11    0.10 
   3  -1  10   -0.06    0.12 
   3  -1  10    0.13    0.17 
   4  -2  11    0.10    0.17 
   4  -2  11   -0.07    0.12 
  -5   7   3    0.04    0.20 
  -5   7   3    0.51    0.25 
   5  -7  -3    0.72    0.22 
  -4   6   4   13.49    0.66 
  -4   6   4   12.47    0.63 
   4  -6  -4   12.38    0.58 
  -3   5   5    7.18    0.43 
  -3   5   5    6.61    0.39 
  -3   5   5    6.44    0.43 
   3  -5  -5    6.60    0.38 
  -2   4   6    0.04    0.09 
  -2   4   6    0.14    0.11 
  -2   4   6    0.03    0.10 
   2  -4  -6    0.02    0.08 
  -1   3   7    1.67    0.18 
  -1   3   7    2.02    0.19 
  -1   3   7    1.91    0.19 
   1  -3  -7    2.23    0.20 
   1  -3  -7    2.08    0.17 
   1  -3  -7    2.09    0.17 
   0   2   8    4.15    0.25 
   0   2   8    4.52    0.26 
   0   2   8    4.00    0.25 
   0  -2  -8    4.30    0.20 
   0  -2  -8    4.90    0.22 
   1   1   9    0.40    0.13 
   1   1   9    0.45    0.12 
   1   1   9    0.71    0.14 
   1   1   9    0.36    0.16 
   1   1   9    0.58    0.07 
  -1  -1  -9    0.51    0.08 
  -1  -1  -9    0.62    0.09 
   2   0  10    4.22    0.32 
   2   0  10    4.17    0.30 
   2   0  10    4.64    0.43 
  -2   0 -10    3.91    0.21 
  -2   0 -10    4.13    0.19 
   3  -1  11    0.21    0.13 
   3  -1  11    0.28    0.16 
   3  -1  11    0.07    0.19 
   4  -2  12   -0.23    0.15 
   4  -2  12   -0.03    0.15 
  -5   7   4    1.55    0.35 
  -5   7   4    1.95    0.34 
  -4   6   5    0.84    0.23 
  -4   6   5    0.90    0.25 
   4  -6  -5    1.10    0.23 
  -3   5   6    4.13    0.32 
  -3   5   6    4.63    0.36 
  -3   5   6    4.63    0.37 
   3  -5  -6    4.53    0.32 
  -2   4   7    0.02    0.11 
  -2   4   7    0.18    0.13 
  -2   4   7    0.14    0.10 
   2  -4  -7    0.08    0.08 
   2  -4  -7    0.09    0.11 
  -1   3   8    1.00    0.17 
  -1   3   8    1.03    0.15 
  -1   3   8    0.83    0.15 
   1  -3  -8    1.07    0.13 
   1  -3  -8    0.99    0.12 
   0   2   9    2.13    0.22 
   0   2   9    2.63    0.24 
   0   2   9    2.36    0.22 
   0  -2  -9    1.87    0.12 
   0  -2  -9    2.22    0.14 
   1   1  10    0.15    0.10 
   1   1  10   -0.13    0.14 
   1   1  10    0.00    0.10 
   1   1  10    0.11    0.10 
  -1  -1 -10   -0.04    0.05 
   2   0  11    8.86    0.46 
   2   0  11    8.90    0.44 
   2   0  11    9.30    0.53 
   3  -1  12    0.39    0.15 
   3  -1  12    0.64    0.21 
   3  -1  12    0.98    0.27 
  -5   7   5    1.16    0.31 
  -5   7   5    1.49    0.31 
  -4   6   6    3.37    0.38 
  -4   6   6    3.08    0.37 
   4  -6  -6    3.53    0.44 
  -3   5   7   10.95    0.55 
  -3   5   7   10.74    0.53 
   3  -5  -7   11.36    0.48 
  -2   4   8    9.93    0.47 
  -2   4   8   10.61    0.45 
  -2   4   8   10.87    0.50 
   2  -4  -8   10.43    0.41 
   2  -4  -8   10.76    0.41 
  -1   3   9   10.61    0.43 
  -1   3   9    9.94    0.44 
  -1   3   9   10.29    0.45 
   1  -3  -9   10.60    0.34 
   1  -3  -9   10.58    0.35 
   0   2  10    0.40    0.14 
   0   2  10    0.21    0.12 
   0   2  10    0.04    0.11 
   0  -2 -10    0.29    0.06 
   1   1  11    5.85    0.44 
   1   1  11    4.84    0.31 
   1   1  11    5.26    0.34 
   2   0  12   -0.05    0.13 
   2   0  12   -0.07    0.19 
   2   0  12    0.07    0.12 
   3  -1  13    0.49    0.18 
   3  -1  13    0.63    0.28 
   3  -1  13   -0.01    0.16 
  -5   7   6   -0.09    0.20 
  -5   7   6    0.15    0.20 
  -4   6   7   -0.25    0.14 
  -4   6   7   -0.11    0.17 
  -3   5   8    2.43    0.30 
  -3   5   8    3.24    0.33 
   3  -5  -8    3.30    0.28 
  -2   4   9    3.02    0.30 
  -2   4   9    4.17    0.36 
   2  -4  -9    3.86    0.24 
   2  -4  -9    3.71    0.24 
  -1   3  10   12.57    0.51 
  -1   3  10   12.02    0.48 
  -1   3  10   12.04    0.50 
   1  -3 -10   12.12    0.36 
   0   2  11    0.53    0.14 
   0   2  11    0.19    0.13 
   1   1  12    0.49    0.22 
   1   1  12    0.60    0.16 
   1   1  12    0.25    0.14 
   2   0  13   -0.09    0.17 
   2   0  13   -0.11    0.12 
   2   0  13   -0.16    0.13 
  -5   7   7    2.66    0.40 
  -5   7   7    2.45    0.43 
  -4   6   8    0.93    0.26 
  -4   6   8    1.13    0.26 
  -3   5   9    3.61    0.36 
  -3   5   9    4.03    0.38 
  -2   4  10    0.18    0.15 
  -2   4  10   -0.18    0.10 
  -1   3  11    1.07    0.19 
  -1   3  11    0.91    0.19 
   0   2  12    2.99    0.29 
   0   2  12    3.61    0.33 
   1   1  13    0.40    0.14 
   1   1  13    0.54    0.17 
   1   1  13    0.61    0.23 
   2   0  14   -0.09    0.14 
   2   0  14    0.16    0.22 
   2   0  14   -0.07    0.12 
  -4   6   9    0.62    0.22 
  -4   6   9    0.55    0.21 
  -3   5  10    0.26    0.17 
  -3   5  10    0.40    0.20 
  -2   4  11    0.08    0.14 
  -2   4  11   -0.13    0.13 
  -1   3  12    3.18    0.31 
  -1   3  12    3.63    0.33 
   0   2  13    0.18    0.20 
   0   2  13   -0.05    0.12 
   0   2  13    0.00    0.12 
   1   1  14   -0.17    0.12 
   1   1  14   -0.25    0.11 
   1   1  14    0.35    0.22 
  -4   6  10    0.15    0.21 
  -4   6  10   -0.25    0.14 
  -3   5  11    0.31    0.19 
  -3   5  11    0.18    0.17 
  -2   4  12   -0.15    0.12 
  -2   4  12    0.00    0.14 
  -1   3  13   -0.16    0.12 
  -1   3  13    0.30    0.16 
   0   2  14    0.00    0.19 
   0   2  14    0.39    0.17 
   0   2  14    0.06    0.15 
  -3   5  12    0.36    0.19 
  -3   5  12    0.33    0.21 
  -2   4  13    0.78    0.22 
  -2   4  13    0.28    0.19 
  -1   3  14   -0.09    0.14 
  -1   3  14    0.03    0.16 
  -4   1  12    0.31    0.23 
  -4   1  12    0.57    0.16 
  -4   1  12    0.84    0.18 
  -5   2  11    0.15    0.16 
  -5   2  11    0.22    0.16 
  -2  -1  13   -0.09    0.18 
  -2  -1  13   -0.07    0.09 
  -2  -1  13   -0.12    0.09 
  -3   0  12    1.08    0.17 
  -3   0  12    0.89    0.21 
  -3   0  12    1.08    0.17 
  -4   1  11    0.84    0.18 
  -4   1  11    0.55    0.16 
  -4   1  11    0.55    0.22 
  -5   2  10   -0.15    0.17 
  -5   2  10   -0.24    0.12 
  -5   2  10   -0.04    0.12 
  -6   3   9    0.90    0.24 
  -6   3   9    0.59    0.22 
  -1  -2  13    0.20    0.12 
  -1  -2  13    0.13    0.20 
  -1  -2  13    0.23    0.12 
  -2  -1  12    0.31    0.11 
  -2  -1  12    0.46    0.20 
  -2  -1  12    0.59    0.12 
  -3   0  11    1.86    0.20 
  -3   0  11    2.23    0.21 
  -3   0  11    1.54    0.26 
  -4   1  10    0.06    0.12 
  -4   1  10   -0.23    0.15 
  -4   1  10    0.15    0.11 
  -5   2   9    1.08    0.22 
  -5   2   9    1.44    0.24 
  -5   2   9    1.42    0.29 
  -6   3   8    0.11    0.17 
  -6   3   8    0.29    0.18 
  -1  -2  12    0.05    0.09 
  -1  -2  12   -0.03    0.16 
  -1  -2  12   -0.03    0.08 
  -2  -1  11    0.55    0.16 
  -2  -1  11    0.51    0.11 
  -2  -1  11    0.69    0.13 
  -3   0  10    0.25    0.10 
  -3   0  10    0.34    0.16 
  -3   0  10    0.26    0.11 
  -4   1   9    0.12    0.11 
  -4   1   9    0.00    0.11 
  -4   1   9   -0.24    0.11 
  -5   2   8   -0.05    0.12 
  -5   2   8   -0.20    0.10 
  -5   2   8   -0.12    0.17 
  -6   3   7    3.86    0.40 
  -6   3   7    3.76    0.38 
  -7   4   6    0.55    0.24 
   0  -3  12    0.64    0.16 
   0  -3  12    0.57    0.14 
   0  -3  12    0.69    0.25 
  -1  -2  11    0.56    0.12 
  -1  -2  11    0.57    0.15 
  -1  -2  11    0.44    0.21 
  -1  -2  11    0.45    0.10 
  -2  -1  10    0.13    0.12 
  -2  -1  10   -0.02    0.07 
  -2  -1  10    0.07    0.07 
  -3   0   9    5.18    0.27 
  -3   0   9    4.78    0.34 
  -3   0   9    5.72    0.28 
  -3   0   9    5.25    0.25 
  -4   1   8    6.73    0.33 
  -4   1   8    6.22    0.41 
  -4   1   8    6.83    0.35 
  -4   1   8    6.26    0.34 
  -5   2   7    1.18    0.25 
  -5   2   7    1.30    0.23 
  -5   2   7    1.84    0.25 
  -6   3   6   -0.08    0.14 
  -6   3   6    0.12    0.15 
  -7   4   5    3.26    0.42 
   0  -3  11    1.74    0.31 
   0  -3  11    1.35    0.19 
   0  -3  11    1.42    0.18 
  -1  -2  10    1.88    0.16 
  -1  -2  10    2.40    0.18 
  -1  -2  10    2.14    0.30 
  -2  -1   9    9.55    0.32 
  -2  -1   9   10.29    0.44 
  -2  -1   9   10.24    0.32 
  -3   0   8   74.89    1.70 
  -3   0   8   73.42    1.51 
  -3   0   8   74.49    1.53 
  -3   0   8   74.52    1.53 
  -4   1   7    0.49    0.14 
  -4   1   7    0.40    0.17 
  -4   1   7    0.20    0.09 
  -4   1   7    0.22    0.11 
   5  -2  -6    0.87    0.15 
  -5   2   6    1.13    0.25 
  -5   2   6    0.40    0.15 
  -5   2   6    1.09    0.21 
  -6   3   5    2.16    0.31 
  -6   3   5    1.70    0.28 
  -7   4   4    0.84    0.28 
   1  -4  11    0.46    0.15 
   1  -4  11    0.48    0.24 
   0  -3  10    0.71    0.21 
   0  -3  10    0.72    0.13 
   0  -3  10    0.49    0.13 
  -1  -2   9    9.00    0.30 
  -1  -2   9    8.68    0.30 
  -1  -2   9    8.59    0.31 
  -1  -2   9    9.26    0.48 
  -2  -1   8    2.71    0.16 
  -2  -1   8    2.65    0.15 
  -2  -1   8    2.77    0.26 
  -2  -1   8    2.86    0.15 
  -3   0   7    0.07    0.08 
  -3   0   7    0.08    0.06 
  -3   0   7    0.17    0.14 
  -3   0   7    0.15    0.08 
   4  -1  -6    0.39    0.07 
   4  -1  -6    0.27    0.07 
  -4   1   6    0.34    0.12 
  -4   1   6    0.37    0.12 
  -4   1   6    0.26    0.10 
  -4   1   6    0.50    0.17 
   5  -2  -5    2.11    0.21 
  -5   2   5    2.57    0.33 
  -5   2   5    2.17    0.24 
  -5   2   5    2.02    0.25 
  -5   2   5    1.35    0.21 
  -6   3   4    0.54    0.20 
  -7   4   3    1.11    0.27 
   1  -4  10    1.34    0.20 
   1  -4  10    1.17    0.27 
   0  -3   9    1.43    0.24 
   0  -3   9    1.79    0.18 
   0  -3   9    1.69    0.18 
  -1  -2   8    0.15    0.06 
  -1  -2   8    0.04    0.14 
  -1  -2   8    0.11    0.06 
  -1  -2   8    0.03    0.06 
  -2  -1   7    2.68    0.13 
  -2  -1   7    2.70    0.13 
  -2  -1   7    2.78    0.14 
  -2  -1   7    2.73    0.22 
  -2  -1   7    2.63    0.13 
  -3   0   6    5.11    0.22 
  -3   0   6    4.56    0.31 
  -3   0   6    5.42    0.23 
  -3   0   6    4.56    0.23 
   4  -1  -5    3.07    0.18 
  -4   1   5    3.40    0.32 
  -4   1   5    3.29    0.25 
  -4   1   5    2.98    0.24 
  -4   1   5    3.66    0.23 
   5  -2  -4    1.46    0.19 
  -5   2   4    1.82    0.27 
  -5   2   4    1.45    0.21 
  -5   2   4    2.06    0.24 
  -5   2   4    1.39    0.22 
   6  -3  -3    8.21    0.44 
  -6   3   3    8.29    0.51 
  -7   4   2    0.10    0.20 
   2  -5  10    0.02    0.12 
   1  -4   9    3.28    0.38 
   1  -4   9    2.53    0.25 
   0  -3   8   10.42    0.37 
   0  -3   8    9.71    0.37 
   0  -3   8    9.67    0.47 
   0  -3   8   10.58    0.37 
  -1  -2   7    1.32    0.20 
  -1  -2   7    1.31    0.10 
  -1  -2   7    1.63    0.11 
  -1  -2   7    1.44    0.11 
  -2  -1   6   23.65    0.49 
  -2  -1   6   23.07    0.50 
  -2  -1   6   23.18    0.66 
  -2  -1   6   24.10    0.50 
  -2  -1   6   23.18    0.49 
  -3   0   5    1.01    0.11 
  -3   0   5    0.90    0.11 
  -3   0   5    0.90    0.16 
  -3   0   5    0.93    0.10 
   4  -1  -4    8.28    0.31 
  -4   1   4    8.28    0.34 
  -4   1   4    8.08    0.42 
  -4   1   4    7.75    0.35 
  -4   1   4    8.17    0.36 
   5  -2  -3    0.86    0.16 
  -5   2   3    0.77    0.21 
  -5   2   3    0.66    0.16 
  -5   2   3    0.27    0.15 
  -5   2   3    0.45    0.16 
   6  -3  -2    0.28    0.15 
  -6   3   2    0.50    0.19 
   7  -4  -1   -0.06    0.12 
  -7   4   1   -0.18    0.17 
   2  -5   9    0.74    0.18 
   1  -4   8    5.46    0.39 
   1  -4   8    4.60    0.30 
   0  -3   7    0.18    0.08 
   0  -3   7    0.07    0.07 
   0  -3   7    0.12    0.12 
   0  -3   7    0.20    0.09 
  -1  -2   6   19.28    0.59 
  -1  -2   6   18.78    0.42 
  -1  -2   6   18.55    0.42 
  -1  -2   6   19.04    0.42 
  -2  -1   5   36.25    0.71 
  -2  -1   5   36.60    0.71 
  -2  -1   5   37.28    0.71 
   3   0  -4   12.41    0.30 
   3   0  -4   12.28    0.28 
   3   0  -4   12.62    0.30 
   3   0  -4   11.98    0.28 
  -3   0   4   12.60    0.37 
  -3   0   4   12.35    0.45 
  -3   0   4   12.38    0.36 
  -3   0   4   12.33    0.36 
  -4   1   3    3.11    0.23 
  -4   1   3    3.22    0.23 
  -4   1   3    3.42    0.27 
  -4   1   3    3.34    0.22 
   5  -2  -2    5.31    0.32 
  -5   2   2    5.47    0.36 
  -5   2   2    5.09    0.33 
   6  -3  -1   15.28    0.63 
  -6   3   1   16.68    0.70 
   7  -4   0    0.24    0.17 
  -7   4   0    0.29    0.20 
   3  -6   9    0.46    0.19 
   2  -5   8    1.90    0.25 
  -1   4  -7    1.57    0.10 
   1  -4   7    1.56    0.19 
   1  -4   7    1.63    0.21 
   1  -4   7    1.98    0.22 
   1  -4   7    1.44    0.25 
   0  -3   6    0.39    0.09 
   0  -3   6    0.24    0.08 
   0  -3   6    0.41    0.10 
   0  -3   6    0.43    0.13 
  -1  -2   5    1.59    0.08 
  -1  -2   5    1.61    0.08 
  -1  -2   5    1.63    0.17 
  -1  -2   5    1.54    0.08 
  -2  -1   4   10.54    0.23 
  -2  -1   4   10.51    0.24 
  -2  -1   4   10.15    0.23 
   3   0  -3    9.03    0.26 
   3   0  -3    9.91    0.28 
   3   0  -3    9.49    0.27 
  -3   0   3    9.68    0.32 
  -3   0   3    9.95    0.31 
  -3   0   3   10.42    0.32 
  -3   0   3    9.67    0.38 
   4  -1  -2    1.78    0.17 
  -4   1   2    2.14    0.21 
  -4   1   2    2.37    0.22 
  -4   1   2    2.24    0.20 
  -4   1   2    2.22    0.24 
   5  -2  -1    4.84    0.31 
  -5   2   1    4.37    0.31 
   6  -3   0    5.61    0.39 
  -6   3   0    5.80    0.44 
   7  -4   1    0.15    0.17 
  -7   4  -1    0.07    0.19 
   3  -6   8    0.17    0.15 
   2  -5   7    4.71    0.34 
  -1   4  -6    3.23    0.17 
   1  -4   6    3.71    0.25 
   1  -4   6    2.88    0.23 
   1  -4   6    3.71    0.25 
   0   3  -5    9.90    0.21 
   0  -3   5    9.93    0.32 
   0  -3   5    9.88    0.39 
   0  -3   5    9.66    0.33 
   0  -3   5    9.37    0.31 
  -1  -2   4   63.91    1.31 
  -1  -2   4   62.82    1.16 
  -1  -2   4   62.74    1.16 
  -1  -2   4   63.78    1.16 
  -2  -1   3    0.22    0.03 
  -2  -1   3    0.18    0.03 
  -2  -1   3    0.14    0.03 
   3   0  -2    1.04    0.10 
   3   0  -2    1.03    0.14 
   3   0  -2    0.97    0.10 
   3   0  -2    0.87    0.10 
  -3   0   2    1.03    0.11 
  -3   0   2    0.84    0.10 
  -3   0   2    0.91    0.11 
  -3   0   2    0.71    0.13 
   4  -1  -1   11.34    0.41 
  -4   1   1   11.41    0.46 
  -4   1   1   12.07    0.43 
  -4   1   1   12.67    0.45 
   5  -2   0   14.00    0.54 
  -5   2   0   13.55    0.56 
  -5   2   0   13.63    0.62 
   6  -3   1    0.24    0.14 
  -6   3  -1    0.24    0.18 
   7  -4   2   -0.12    0.13 
  -7   4  -2    0.09    0.20 
   3  -6   7    1.61    0.26 
  -2   5  -6    3.87    0.25 
   2  -5   6    3.63    0.30 
  -1   4  -5    0.16    0.08 
   1  -4   5    0.03    0.09 
   1  -4   5    0.16    0.09 
   1  -4   5    0.13    0.09 
   0   3  -4    4.62    0.23 
   0   3  -4    4.53    0.14 
   0   3  -4    4.44    0.14 
   0   3  -4    4.66    0.15 
   0  -3   4    4.33    0.24 
   0  -3   4    4.49    0.20 
   0  -3   4    4.15    0.20 
   0  -3   4    4.77    0.20 
  -1  -2   3   73.75    1.46 
  -1  -2   3   75.18    1.34 
  -1  -2   3   74.36    1.35 
  -1  -2   3   74.47    1.34 
  -2  -1   2    0.52    0.05 
  -2  -1   2    0.67    0.06 
  -2  -1   2    0.69    0.06 
   3   0  -1   -0.03    0.06 
   3   0  -1    0.02    0.04 
   3   0  -1   -0.02    0.05 
   3   0  -1    0.07    0.05 
  -3   0   1    0.04    0.08 
  -3   0   1    0.02    0.05 
  -3   0   1    0.16    0.07 
   4  -1   0    1.53    0.17 
  -4   1   0    1.31    0.17 
  -4   1   0    1.60    0.20 
  -4   1   0    1.95    0.19 
  -4   1   0    1.93    0.21 
   5  -2   1    4.29    0.31 
  -5   2  -1    4.22    0.33 
   6  -3   2    8.36    0.48 
  -6   3  -2    9.60    0.54 
   7  -4   3   -0.08    0.16 
  -7   4  -3    0.30    0.23 
   3  -6   6    1.28    0.23 
  -2   5  -5   13.60    0.49 
   2  -5   5   13.02    0.53 
   2  -5   5   12.91    0.54 
   2  -5   5   12.39    0.52 
  -1   4  -4    0.54    0.10 
   1  -4   4    0.29    0.10 
   1  -4   4    0.58    0.13 
   1  -4   4    0.58    0.12 
   0   3  -3   10.94    0.35 
   0   3  -3   10.82    0.29 
   0   3  -3   11.46    0.30 
   0  -3   3   10.98    0.33 
   0  -3   3   11.22    0.36 
   0  -3   3   10.94    0.33 
   0  -3   3   11.15    0.33 
  -1  -2   2    6.29    0.15 
  -1  -2   2    6.33    0.15 
  -1  -2   2    6.58    0.21 
  -1  -2   2    6.52    0.16 
   2   1  -1   53.29    1.01 
   2   1  -1   54.20    1.02 
   2   1  -1   54.35    1.02 
  -2  -1   1   54.69    1.04 
  -2  -1   1   53.12    1.03 
  -2  -1   1   53.11    1.03 
   3   0   0    1.68    0.14 
   3   0   0    2.13    0.18 
   3   0   0    1.61    0.14 
   3   0   0    1.79    0.14 
  -3   0   0    1.70    0.14 
  -3   0   0    1.52    0.14 
  -3   0   0    1.34    0.15 
  -3   0   0    1.79    0.15 
   4  -1   1   11.72    0.43 
   4  -1   1   11.50    0.43 
  -4   1  -1   12.03    0.43 
  -4   1  -1   10.59    0.43 
  -4   1  -1   11.18    0.43 
   5  -2   2    2.43    0.27 
  -5   2  -2    3.15    0.32 
   6  -3   3    0.07    0.13 
  -6   3  -3   -0.17    0.14 
   7  -4   4    0.27    0.19 
  -7   4  -4    0.37    0.23 
   4  -7   6    0.08    0.17 
  -3   6  -5    8.56    0.46 
   3  -6   5    8.24    0.48 
  -2   5  -4    0.37    0.13 
   2  -5   4    0.10    0.11 
   2  -5   4    0.32    0.14 
   2  -5   4    0.29    0.15 
  -1   4  -3    0.04    0.07 
  -1   4  -3   -0.04    0.07 
   1  -4   3   -0.10    0.07 
   1  -4   3   -0.08    0.06 
   1  -4   3    0.00    0.07 
   0   3  -2    0.90    0.09 
   0   3  -2    0.89    0.09 
   0   3  -2    0.86    0.08 
   0   3  -2    0.84    0.10 
   0  -3   2    0.81    0.10 
   0  -3   2    0.77    0.09 
   0  -3   2    0.64    0.08 
   1   2  -1  180.73    3.20 
  -1  -2   1  180.36    3.21 
  -1  -2   1  179.31    3.22 
  -1  -2   1  178.30    3.22 
  -1  -2   1  177.21    3.22 
   2   1   0   70.44    1.35 
   2   1   0   71.29    1.35 
  -2  -1   0   70.66    1.35 
  -2  -1   0   70.72    1.35 
  -2  -1   0   70.92    1.35 
   3   0   1   11.51    0.37 
   3   0   1   11.32    0.37 
   3   0   1   11.40    0.36 
  -3   0  -1   11.75    0.37 
  -3   0  -1   11.37    0.37 
  -3   0  -1   11.96    0.38 
   4  -1   2    0.04    0.08 
   4  -1   2   -0.10    0.09 
  -4   1  -2    0.14    0.09 
  -4   1  -2    0.06    0.10 
   5  -2   3    3.02    0.30 
  -5   2  -3    2.69    0.29 
   6  -3   4    0.17    0.14 
  -6   3  -4    0.02    0.15 
   7  -4   5    2.40    0.36 
  -7   4  -5    2.02    0.36 
   4  -7   5    8.99    0.58 
  -3   6  -4    1.41    0.23 
   3  -6   4    1.77    0.26 
  -2   5  -3    4.90    0.31 
   2  -5   3    4.67    0.33 
   2  -5   3    4.71    0.32 
   2  -5   3    4.72    0.31 
  -1   4  -2    5.33    0.26 
  -1   4  -2    5.55    0.27 
   1  -4   2    5.83    0.28 
   1  -4   2    5.52    0.27 
   1  -4   2    5.69    0.28 
   0   3  -1    3.75    0.17 
   0   3  -1    3.87    0.17 
   0  -3   1    3.89    0.18 
   0  -3   1    3.87    0.18 
   0  -3   1    3.94    0.18 
   1   2   0   23.46    0.49 
  -1  -2   0   24.04    0.49 
  -1  -2   0   24.37    0.50 
  -1  -2   0   22.87    0.49 
   2   1   1    5.86    0.21 
   2   1   1    5.52    0.20 
   2   1   1    5.78    0.21 
  -2  -1  -1    5.57    0.21 
  -2  -1  -1    5.73    0.20 
  -2  -1  -1    5.31    0.21 
  -2  -1  -1    5.50    0.20 
   3   0   2   87.20    1.71 
   3   0   2   88.74    1.75 
   3   0   2   86.94    1.74 
   3   0   2   85.67    1.75 
  -3   0  -2   85.78    1.71 
  -3   0  -2   87.08    1.74 
  -3   0  -2   86.21    1.75 
  -3   0  -2   86.94    1.74 
  -3   0  -2   85.87    1.75 
   4  -1   3    1.75    0.19 
  -4   1  -3    2.37    0.24 
   5  -2   4    2.64    0.29 
  -5   2  -4    1.95    0.25 
   6  -3   5    1.41    0.26 
  -6   3  -5    2.07    0.32 
   7  -4   6    0.65    0.25 
  -7   4  -6    0.56    0.26 
  -4   7  -4   -0.02    0.20 
   4  -7   4    0.21    0.17 
  -3   6  -3    0.81    0.20 
   3  -6   3    0.54    0.18 
  -2   5  -2    2.44    0.24 
   2  -5   2    2.23    0.24 
   2  -5   2    2.92    0.27 
  -1   4  -1    0.16    0.09 
  -1   4  -1    0.09    0.06 
  -1   4  -1    0.08    0.08 
   1  -4   1    0.18    0.09 
   1  -4   1    0.08    0.07 
   1  -4   1    0.14    0.08 
   0   3   0    2.69    0.15 
   0   3   0    2.47    0.14 
   0   3   0    2.52    0.15 
   0  -3   0    2.54    0.16 
   0  -3   0    2.33    0.15 
   0  -3   0    2.62    0.15 
   1   2   1   38.45    0.77 
   1   2   1   37.25    0.77 
  -1  -2  -1   38.11    0.77 
  -1  -2  -1   37.45    0.77 
  -1  -2  -1   37.93    0.76 
   2   1   2  194.09    3.52 
   2   1   2  194.42    3.54 
   2   1   2  193.46    3.55 
   2   1   2  194.12    3.54 
  -2  -1  -2  192.11    3.49 
  -2  -1  -2  195.40    3.54 
  -2  -1  -2  191.56    3.54 
  -2  -1  -2  189.81    3.52 
  -2  -1  -2  191.23    3.54 
   3   0   3   51.03    1.12 
   3   0   3   50.15    1.12 
   3   0   3   49.67    1.05 
   3   0   3   50.29    1.12 
  -3   0  -3   50.09    1.11 
  -3   0  -3   49.81    1.11 
  -3   0  -3   50.92    1.11 
  -3   0  -3   50.04    1.11 
   4  -1   4   -0.03    0.09 
   4  -1   4   -0.05    0.09 
   4  -1   4   -0.07    0.08 
  -4   1  -4    0.14    0.11 
   5  -2   5    0.85    0.19 
  -5   2  -5    0.83    0.20 
   6  -3   6    0.84    0.21 
  -6   3  -6    0.84    0.23 
  -4   7  -3    0.15    0.19 
   4  -7   3    0.56    0.20 
  -3   6  -2    1.71    0.25 
   3  -6   2    1.44    0.23 
  -2   5  -1   18.15    0.62 
   2  -5   1   18.53    0.63 
   2  -5   1   19.06    0.63 
  -1   4   0    0.10    0.07 
  -1   4   0    0.01    0.07 
  -1   4   0    0.03    0.08 
   1  -4   0    0.03    0.07 
   1  -4   0   -0.01    0.07 
   1  -4   0    0.05    0.08 
   0   3   1    0.64    0.09 
   0   3   1    0.43    0.08 
   0   3   1    0.76    0.09 
   0  -3  -1    0.54    0.09 
   0  -3  -1    0.71    0.10 
   0  -3  -1    0.55    0.09 
   1   2   2   44.35    0.89 
   1   2   2   42.54    0.89 
   1   2   2   43.16    0.89 
  -1  -2  -2   42.65    0.89 
  -1  -2  -2   43.79    0.88 
  -1  -2  -2   43.87    0.89 
  -1  -2  -2   44.01    0.89 
   2   1   3    1.44    0.13 
   2   1   3    1.49    0.13 
   2   1   3    1.28    0.12 
   2   1   3    1.10    0.12 
  -2  -1  -3    1.26    0.12 
  -2  -1  -3    1.18    0.08 
  -2  -1  -3    1.31    0.12 
  -2  -1  -3    1.13    0.11 
  -2  -1  -3    0.92    0.10 
   3   0   4    4.52    0.24 
   3   0   4    4.39    0.25 
   3   0   4    4.19    0.19 
   3   0   4    4.51    0.25 
   3   0   4    4.35    0.24 
  -3   0  -4    4.22    0.24 
  -3   0  -4    4.52    0.23 
  -3   0  -4    4.28    0.24 
  -3   0  -4    4.30    0.23 
   4  -1   5   13.22    0.45 
   4  -1   5   13.35    0.54 
   4  -1   5   14.23    0.53 
  -4   1  -5   13.20    0.51 
   5  -2   6    5.39    0.38 
  -5   2  -6    5.42    0.38 
   6  -3   7    0.66    0.20 
  -6   3  -7    0.67    0.21 
  -4   7  -2    0.68    0.23 
   4  -7   2    0.74    0.21 
  -3   6  -1    1.32    0.24 
   3  -6   1    1.77    0.25 
  -2   5   0    3.84    0.29 
  -2   5   0    3.89    0.30 
   2  -5   0    3.49    0.28 
   2  -5   0    3.71    0.27 
  -1   4   1    3.78    0.24 
  -1   4   1    4.17    0.24 
  -1   4   1    3.82    0.22 
   1  -4  -1    4.19    0.24 
   1  -4  -1    4.22    0.24 
   1  -4  -1    4.14    0.23 
   0   3   2   26.18    0.64 
   0   3   2   26.73    0.64 
   0   3   2   27.46    0.63 
   0  -3  -2   27.56    0.64 
   0  -3  -2   25.89    0.63 
   0  -3  -2   27.54    0.65 
   1   2   3   53.85    1.11 
   1   2   3   54.43    1.11 
   1   2   3   54.20    1.11 
  -1  -2  -3   55.42    1.10 
  -1  -2  -3   54.94    1.10 
  -1  -2  -3   54.16    1.10 
  -1  -2  -3   54.41    1.11 
   2   1   4    1.20    0.14 
   2   1   4    1.06    0.12 
   2   1   4    1.16    0.12 
   2   1   4    1.58    0.14 
  -2  -1  -4    1.49    0.14 
  -2  -1  -4    1.94    0.14 
  -2  -1  -4    1.17    0.11 
   3   0   5   25.85    0.58 
   3   0   5   25.14    0.69 
   3   0   5   26.30    0.70 
   3   0   5   24.93    0.70 
   3   0   5   25.04    0.71 
  -3   0  -5   25.17    0.68 
  -3   0  -5   24.55    0.70 
   4  -1   6    0.41    0.14 
   4  -1   6    0.65    0.13 
   4  -1   6    0.44    0.15 
  -4   1  -6    0.66    0.16 
   5  -2   7    2.20    0.28 
  -5   2  -7    3.05    0.31 
   6  -3   8   -0.22    0.11 
  -4   7  -1    0.65    0.25 
   4  -7   1    0.61    0.20 
  -3   6   0   -0.16    0.16 
  -3   6   0   -0.01    0.15 
   3  -6   0   -0.09    0.12 
  -2   5   1    0.68    0.16 
  -2   5   1    1.00    0.19 
   2  -5  -1    1.00    0.20 
   2  -5  -1    0.65    0.14 
  -1   4   2    2.51    0.19 
  -1   4   2    2.41    0.20 
  -1   4   2    2.44    0.20 
   1  -4  -2    2.64    0.20 
   1  -4  -2    2.60    0.19 
   1  -4  -2    2.91    0.21 
   0   3   3   24.85    0.63 
   0   3   3   25.94    0.64 
   0   3   3   26.34    0.62 
   0  -3  -3   26.23    0.63 
   0  -3  -3   25.21    0.62 
   0  -3  -3   25.44    0.63 
   1   2   4    0.18    0.07 
   1   2   4    0.22    0.07 
   1   2   4    0.23    0.07 
  -1  -2  -4    0.33    0.07 
  -1  -2  -4    0.17    0.06 
  -1  -2  -4    0.23    0.07 
  -1  -2  -4    0.24    0.06 
   2   1   5    6.36    0.27 
   2   1   5    6.06    0.26 
   2   1   5    5.45    0.27 
  -2  -1  -5    6.03    0.24 
  -2  -1  -5    6.15    0.25 
  -2  -1  -5    6.14    0.25 
   3   0   6    0.08    0.09 
   3   0   6   -0.07    0.07 
   3   0   6    0.03    0.06 
   3   0   6    0.00    0.10 
   3   0   6    0.01    0.08 
  -3   0  -6    0.20    0.09 
   4  -1   7    2.25    0.26 
   4  -1   7    1.83    0.25 
   4  -1   7    2.25    0.20 
  -4   1  -7    1.74    0.22 
   5  -2   8    0.33    0.15 
  -5   2  -8    0.23    0.16 
   6  -3   9    0.80    0.24 
  -5   8  -1    4.36    0.50 
   5  -8   1    3.18    0.39 
  -4   7   0    1.85    0.32 
   4  -7   0    1.01    0.25 
  -3   6   1    0.19    0.18 
  -3   6   1    0.24    0.17 
   3  -6  -1    0.47    0.16 
  -2   5   2    1.10    0.18 
  -2   5   2    1.12    0.19 
   2  -5  -2    1.33    0.18 
  -1   4   3   -0.01    0.08 
  -1   4   3   -0.03    0.07 
  -1   4   3   -0.05    0.08 
   1  -4  -3    0.02    0.07 
   1  -4  -3    0.07    0.08 
   1  -4  -3   -0.01    0.07 
   0   3   4    0.01    0.05 
   0   3   4   -0.02    0.06 
   0   3   4   -0.03    0.05 
   0  -3  -4    0.10    0.07 
   0  -3  -4    0.02    0.06 
   0  -3  -4    0.09    0.06 
   0  -3  -4    0.08    0.06 
   1   2   5   19.05    0.51 
   1   2   5   18.26    0.50 
   1   2   5   18.61    0.51 
  -1  -2  -5   18.89    0.39 
  -1  -2  -5   19.14    0.49 
  -1  -2  -5   19.48    0.49 
  -1  -2  -5   19.44    0.49 
  -1  -2  -5   18.69    0.49 
   2   1   6    0.97    0.13 
   2   1   6    0.94    0.12 
   2   1   6    1.23    0.17 
  -2  -1  -6    1.68    0.15 
  -2  -1  -6    1.43    0.15 
   3   0   7    9.78    0.43 
   3   0   7    9.76    0.28 
   3   0   7    9.92    0.42 
   3   0   7    9.13    0.40 
   3   0   7   10.79    0.47 
  -3   0  -7    9.99    0.39 
   4  -1   8   -0.01    0.10 
   4  -1   8   -0.06    0.12 
  -4   1  -8   -0.06    0.09 
   5  -2   9    0.39    0.15 
  -5   8   0    2.39    0.41 
   5  -8   0    2.12    0.33 
  -4   7   1    1.42    0.30 
   4  -7  -1    1.05    0.22 
  -3   6   2   34.84    1.05 
  -3   6   2   33.70    1.05 
   3  -6  -2   34.72    1.02 
  -2   5   3    8.96    0.43 
  -2   5   3    9.84    0.46 
  -2   5   3    9.31    0.42 
   2  -5  -3    9.15    0.42 
  -1   4   4    2.03    0.19 
  -1   4   4    1.40    0.17 
  -1   4   4    1.86    0.19 
   1  -4  -4    1.76    0.17 
   0   3   5   20.06    0.55 
   0   3   5   20.57    0.57 
   0   3   5   20.58    0.57 
   0  -3  -5   19.90    0.55 
   0  -3  -5   20.89    0.55 
   0  -3  -5   21.10    0.55 
   0  -3  -5   21.80    0.56 
   0  -3  -5   20.87    0.52 
   1   2   6    5.89    0.27 
   1   2   6    5.77    0.27 
   1   2   6    6.27    0.27 
  -1  -2  -6    6.20    0.25 
  -1  -2  -6    6.00    0.25 
  -1  -2  -6    6.13    0.24 
   2   1   7   19.50    0.57 
   2   1   7   18.72    0.62 
   2   1   7   19.63    0.58 
   2   1   7   19.41    0.58 
  -2  -1  -7   19.86    0.54 
   3   0   8    2.06    0.23 
   3   0   8    1.78    0.21 
   3   0   8    1.74    0.20 
   3   0   8    2.72    0.30 
   3   0   8    2.26    0.12 
  -3   0  -8    2.24    0.21 
   4  -1   9    1.30    0.23 
   4  -1   9    1.21    0.26 
   4  -1   9    1.12    0.20 
  -4   1  -9    0.99    0.18 
   5  -2  10    1.34    0.25 
  -5   8   1    2.32    0.40 
   5  -8  -1    1.89    0.32 
  -4   7   2    1.00    0.26 
  -4   7   2    0.28    0.19 
   4  -7  -2    0.41    0.17 
  -3   6   3    3.70    0.36 
  -3   6   3    2.94    0.34 
   3  -6  -3    2.85    0.31 
  -2   5   4    1.60    0.21 
  -2   5   4    1.67    0.23 
  -2   5   4    1.62    0.22 
   2  -5  -4    1.92    0.22 
  -1   4   5    7.04    0.34 
  -1   4   5    7.33    0.33 
  -1   4   5    6.59    0.33 
   1  -4  -5    7.26    0.32 
   0   3   6    0.49    0.12 
   0   3   6    0.38    0.10 
   0   3   6    0.42    0.09 
   0  -3  -6    0.40    0.08 
   0  -3  -6    0.27    0.08 
   0  -3  -6    0.42    0.09 
   0  -3  -6    0.48    0.09 
   1   2   7    0.94    0.14 
   1   2   7    1.17    0.15 
   1   2   7    0.79    0.12 
  -1  -2  -7    0.87    0.11 
  -1  -2  -7    1.05    0.13 
  -1  -2  -7    1.14    0.12 
   2   1   8    0.85    0.14 
   2   1   8    1.08    0.16 
   2   1   8    1.04    0.15 
   2   1   8    0.84    0.18 
  -2  -1  -8    1.03    0.13 
  -2  -1  -8    0.97    0.13 
   3   0   9    0.86    0.17 
   3   0   9    0.92    0.17 
   3   0   9    1.01    0.22 
   3   0   9    1.11    0.07 
   3   0   9    0.95    0.19 
  -3   0  -9    0.97    0.15 
   4  -1  10    1.45    0.23 
   4  -1  10    1.55    0.30 
   4  -1  10    1.18    0.24 
   5  -2  11    0.51    0.19 
  -5   8   2    1.63    0.35 
   5  -8  -2    1.38    0.29 
  -4   7   3    0.28    0.20 
  -4   7   3    0.26    0.21 
   4  -7  -3    0.08    0.14 
  -3   6   4   25.38    0.88 
  -3   6   4   26.38    0.90 
   3  -6  -4   26.43    0.85 
  -2   5   5    1.39    0.20 
  -2   5   5    0.69    0.18 
  -2   5   5    0.86    0.17 
   2  -5  -5    1.15    0.18 
  -1   4   6    9.28    0.41 
  -1   4   6    9.45    0.41 
  -1   4   6    9.93    0.40 
   1  -4  -6    9.45    0.37 
   1  -4  -6    9.35    0.39 
   0   3   7    0.33    0.10 
   0   3   7    0.22    0.09 
   0   3   7    0.27    0.10 
   0  -3  -7    0.29    0.09 
   0  -3  -7    0.31    0.08 
   0  -3  -7    0.27    0.08 
   1   2   8    0.99    0.15 
   1   2   8    1.08    0.15 
   1   2   8    1.05    0.16 
  -1  -2  -8    1.45    0.14 
  -1  -2  -8    1.36    0.14 
   2   1   9    6.95    0.41 
   2   1   9    6.40    0.34 
   2   1   9    6.58    0.35 
   2   1   9    6.65    0.35 
  -2  -1  -9    7.08    0.28 
  -2  -1  -9    6.53    0.28 
   3   0  10    9.04    0.45 
   3   0  10    8.72    0.51 
   3   0  10    9.18    0.47 
  -3   0 -10    8.68    0.36 
   4  -1  11    0.26    0.17 
   4  -1  11   -0.09    0.18 
   4  -1  11    0.09    0.14 
  -5   8   3    0.23    0.26 
  -4   7   4    1.11    0.27 
  -4   7   4    1.20    0.27 
   4  -7  -4    1.04    0.24 
  -3   6   5    1.11    0.25 
  -3   6   5    1.48    0.25 
   3  -6  -5    1.10    0.20 
  -2   5   6    0.26    0.16 
  -2   5   6    0.29    0.13 
  -2   5   6   -0.03    0.13 
   2  -5  -6    0.18    0.11 
  -1   4   7   10.38    0.45 
  -1   4   7   10.59    0.45 
  -1   4   7   11.25    0.44 
   1  -4  -7    9.86    0.40 
   1  -4  -7   11.11    0.41 
   0   3   8    3.28    0.24 
   0   3   8    2.96    0.25 
   0   3   8    3.45    0.23 
   0  -3  -8    3.61    0.21 
   0  -3  -8    3.61    0.21 
   1   2   9    1.64    0.19 
   1   2   9    2.12    0.22 
   1   2   9    2.13    0.23 
  -1  -2  -9    1.84    0.16 
   2   1  10   29.28    0.83 
   2   1  10   29.28    0.95 
   2   1  10   27.18    0.83 
   2   1  10   28.06    0.82 
  -2  -1 -10   29.52    0.71 
   3   0  11    5.17    0.37 
   3   0  11    5.52    0.40 
   3   0  11    5.58    0.45 
   4  -1  12    0.36    0.25 
   4  -1  12    0.22    0.20 
   4  -1  12    0.42    0.17 
  -5   8   4   -0.23    0.19 
  -5   8   4    0.00    0.24 
  -4   7   5    3.29    0.42 
  -4   7   5    3.85    0.43 
   4  -7  -5    4.31    0.41 
  -3   6   6    1.75    0.30 
  -3   6   6    2.25    0.31 
   3  -6  -6    2.02    0.26 
  -2   5   7    7.74    0.44 
  -2   5   7    8.41    0.44 
  -2   5   7    7.50    0.40 
   2  -5  -7    8.67    0.40 
  -1   4   8    1.01    0.19 
  -1   4   8    0.62    0.14 
  -1   4   8    0.46    0.15 
   1  -4  -8    0.69    0.12 
   1  -4  -8    0.67    0.14 
   0   3   9   16.98    0.58 
   0   3   9   16.50    0.57 
   0  -3  -9   17.13    0.49 
   0  -3  -9   16.80    0.48 
   1   2  10   11.69    0.47 
   1   2  10   11.18    0.46 
   1   2  10   11.36    0.47 
  -1  -2 -10   11.49    0.36 
  -1  -2 -10   11.54    0.34 
   2   1  11    3.15    0.38 
   2   1  11    2.83    0.28 
   2   1  11    3.19    0.31 
   3   0  12   -0.03    0.18 
   3   0  12    0.01    0.14 
   3   0  12    0.02    0.12 
  -4   7   6    0.13    0.21 
  -4   7   6    0.11    0.19 
  -3   6   7   11.68    0.59 
  -3   6   7   12.43    0.63 
   3  -6  -7   12.55    0.55 
  -2   5   8    1.10    0.21 
  -2   5   8    1.33    0.21 
  -2   5   8    1.64    0.23 
   2  -5  -8    0.98    0.17 
   2  -5  -8    1.29    0.18 
  -1   4   9    4.44    0.30 
  -1   4   9    4.19    0.32 
  -1   4   9    3.95    0.32 
   1  -4  -9    4.50    0.26 
   1  -4  -9    4.10    0.25 
   0   3  10    1.38    0.21 
   0   3  10    1.34    0.20 
   0  -3 -10    1.76    0.14 
   0  -3 -10    1.81    0.16 
   1   2  11    1.00    0.25 
   1   2  11    0.83    0.17 
   1   2  11    0.58    0.16 
   2   1  12    0.52    0.21 
   2   1  12    0.57    0.16 
   2   1  12    0.45    0.17 
   3   0  13    0.50    0.20 
   3   0  13    0.74    0.28 
   3   0  13    0.77    0.19 
  -4   7   7    2.35    0.35 
  -4   7   7    3.39    0.44 
  -3   6   8    2.79    0.33 
  -3   6   8    2.50    0.33 
  -2   5   9    1.01    0.23 
  -2   5   9    0.96    0.21 
   2  -5  -9    1.11    0.19 
  -1   4  10    5.63    0.37 
  -1   4  10    6.16    0.38 
   1  -4 -10    6.30    0.34 
   0   3  11    0.07    0.11 
   0   3  11   -0.05    0.11 
   1   2  12    0.38    0.18 
   1   2  12    0.46    0.16 
   1   2  12    0.45    0.15 
   2   1  13    1.74    0.26 
   2   1  13    1.78    0.26 
   2   1  13    1.86    0.35 
  -4   7   8    1.16    0.30 
  -4   7   8    0.60    0.24 
  -3   6   9    1.16    0.25 
  -3   6   9    0.99    0.23 
  -2   5  10    0.14    0.15 
  -2   5  10    0.41    0.18 
  -1   4  11    0.63    0.18 
  -1   4  11    0.99    0.21 
   0   3  12    1.30    0.22 
   0   3  12    1.98    0.26 
   1   2  13    0.76    0.25 
   1   2  13    0.46    0.16 
   1   2  13    0.57    0.18 
   2   1  14    0.14    0.16 
   2   1  14   -0.03    0.12 
   2   1  14   -0.21    0.18 
  -4   7   9    0.28    0.23 
  -4   7   9   -0.14    0.18 
  -3   6  10    0.07    0.17 
  -3   6  10    0.16    0.17 
  -2   5  11    0.07    0.16 
  -2   5  11    0.30    0.17 
  -1   4  12    0.93    0.21 
  -1   4  12    1.18    0.22 
   0   3  13   -0.01    0.14 
   0   3  13    0.27    0.16 
   1   2  14   -0.01    0.14 
   1   2  14    0.23    0.16 
   1   2  14   -0.20    0.17 
  -3   6  11    0.16    0.18 
  -3   6  11    0.13    0.18 
  -2   5  12    0.13    0.15 
  -2   5  12    0.02    0.16 
  -1   4  13    0.66    0.21 
  -1   4  13    0.47    0.19 
   0   3  14    0.37    0.18 
   0   3  14    0.46    0.19 
  -2   5  13    0.95    0.27 
  -2   5  13    0.53    0.21 
  -4   0  12    1.26    0.27 
  -4   0  12    1.40    0.19 
  -4   0  12    1.32    0.20 
  -5   1  11   -0.03    0.13 
  -5   1  11    0.14    0.14 
  -5   1  11    0.12    0.20 
  -3  -1  12    0.12    0.16 
  -3  -1  12   -0.01    0.09 
  -3  -1  12    0.12    0.09 
  -4   0  11    0.25    0.18 
  -4   0  11    0.11    0.10 
  -4   0  11    0.31    0.13 
  -5   1  10    1.74    0.25 
  -5   1  10    1.87    0.25 
  -5   1  10    2.07    0.34 
  -6   2   9    0.71    0.27 
  -6   2   9    1.13    0.25 
  -6   2   9    1.53    0.27 
  -2  -2  12    0.80    0.24 
  -2  -2  12    0.72    0.12 
  -2  -2  12    0.80    0.13 
  -3  -1  11   -0.09    0.07 
  -3  -1  11    0.28    0.15 
  -3  -1  11    0.06    0.08 
  -4   0  10    6.52    0.33 
  -4   0  10    6.08    0.43 
  -4   0  10    6.68    0.34 
  -5   1   9   -0.09    0.12 
  -5   1   9    0.42    0.21 
  -5   1   9   -0.05    0.11 
  -6   2   8   -0.09    0.12 
  -6   2   8   -0.25    0.18 
  -6   2   8   -0.06    0.13 
  -7   3   7    0.90    0.26 
  -1  -3  12    0.21    0.19 
  -1  -3  12   -0.02    0.09 
  -1  -3  12    0.04    0.09 
  -2  -2  11    0.83    0.18 
  -2  -2  11    0.87    0.24 
  -2  -2  11    0.88    0.12 
  -2  -2  11    0.77    0.11 
  -3  -1  10    1.67    0.16 
  -3  -1  10    1.72    0.16 
  -3  -1  10    2.09    0.27 
  -4   0   9    2.04    0.28 
  -4   0   9    1.76    0.19 
  -4   0   9    1.56    0.18 
  -5   1   8    0.11    0.12 
  -5   1   8    0.02    0.11 
  -5   1   8   -0.10    0.16 
  -6   2   7    7.92    0.48 
  -6   2   7    8.29    0.48 
  -6   2   7    8.23    0.56 
  -7   3   6    3.69    0.42 
   0  -4  12    0.52    0.23 
   0  -4  12    0.61    0.15 
  -1  -3  11    1.19    0.15 
  -1  -3  11    0.93    0.15 
  -1  -3  11    1.23    0.25 
  -2  -2  10    0.31    0.08 
  -2  -2  10    0.45    0.18 
  -2  -2  10    0.44    0.15 
  -2  -2  10    0.37    0.08 
  -3  -1   9    7.21    0.28 
  -3  -1   9    7.39    0.28 
  -3  -1   9    7.52    0.26 
  -3  -1   9    8.16    0.43 
  -4   0   8    0.99    0.14 
  -4   0   8    1.15    0.15 
  -4   0   8    1.09    0.16 
  -4   0   8    1.11    0.23 
  -5   1   7    0.31    0.18 
  -5   1   7    0.29    0.13 
  -5   1   7    0.33    0.14 
  -6   2   6    3.24    0.34 
  -6   2   6    2.07    0.28 
  -6   2   6    2.30    0.35 
  -7   3   5    1.50    0.30 
   0  -4  11    0.14    0.18 
   0  -4  11   -0.03    0.08 
  -1  -3  10    0.93    0.12 
  -1  -3  10    0.80    0.12 
  -1  -3  10    0.67    0.20 
  -2  -2   9    3.98    0.32 
  -2  -2   9    3.53    0.17 
  -2  -2   9    3.36    0.17 
  -2  -2   9    3.54    0.28 
  -2  -2   9    3.47    0.16 
  -3  -1   8    0.12    0.06 
  -3  -1   8    0.11    0.15 
  -3  -1   8    0.10    0.07 
  -3  -1   8    0.17    0.07 
  -4   0   7    0.25    0.17 
  -4   0   7    0.19    0.08 
  -4   0   7    0.11    0.09 
  -4   0   7   -0.11    0.08 
   5  -1  -6    0.07    0.07 
  -5   1   6    0.17    0.12 
  -5   1   6   -0.08    0.14 
  -5   1   6   -0.02    0.09 
  -5   1   6    0.08    0.09 
  -6   2   5    0.70    0.18 
  -6   2   5    0.77    0.23 
  -6   2   5    0.71    0.19 
  -7   3   4    5.71    0.48 
   1  -5  11    0.22    0.14 
   0  -4  10   -0.18    0.12 
   0  -4  10    0.03    0.08 
  -1  -3   9    0.07    0.06 
  -1  -3   9    0.06    0.07 
  -1  -3   9   -0.06    0.12 
  -2  -2   8    2.18    0.12 
  -2  -2   8    2.38    0.12 
  -2  -2   8    2.33    0.12 
  -3  -1   7    2.00    0.25 
  -3  -1   7    1.99    0.13 
  -3  -1   7    2.25    0.14 
  -3  -1   7    2.04    0.14 
  -4   0   6    1.55    0.23 
  -4   0   6    1.83    0.18 
  -4   0   6    1.44    0.15 
  -4   0   6    1.47    0.16 
   5  -1  -5    2.00    0.17 
  -5   1   5    1.83    0.20 
  -5   1   5    1.48    0.25 
  -5   1   5    1.59    0.21 
  -5   1   5    1.60    0.21 
   6  -2  -4    2.71    0.27 
  -6   2   4    2.34    0.32 
  -6   2   4    2.54    0.30 
  -7   3   3   -0.11    0.16 
  -8   4   2    0.63    0.28 
   1  -5  10    0.45    0.15 
   0  -4   9    5.02    0.28 
   0  -4   9    4.96    0.37 
  -1  -3   8    0.57    0.09 
  -1  -3   8    0.58    0.09 
  -1  -3   8    0.76    0.11 
  -1  -3   8    0.81    0.19 
  -2  -2   7    0.05    0.04 
  -2  -2   7    0.08    0.04 
  -2  -2   7    0.05    0.04 
  -3  -1   6    2.95    0.15 
  -3  -1   6    3.12    0.28 
  -3  -1   6    2.65    0.14 
  -3  -1   6    2.74    0.15 
   4   0  -5    0.13    0.04 
  -4   0   5    0.05    0.12 
  -4   0   5    0.18    0.09 
  -4   0   5    0.15    0.07 
  -4   0   5    0.15    0.09 
   5  -1  -4    5.03    0.27 
  -5   1   4    5.53    0.31 
  -5   1   4    4.96    0.32 
  -5   1   4    5.05    0.37 
  -5   1   4    5.00    0.32 
   6  -2  -3   -0.01    0.11 
  -6   2   3   -0.05    0.13 
  -6   2   3   -0.22    0.12 
  -7   3   2    1.34    0.29 
  -8   4   1    1.77    0.36 
   1  -5   9    0.66    0.17 
   0  -4   8    2.17    0.28 
   0  -4   8    2.31    0.21 
   0  -4   8    1.81    0.18 
  -1  -3   7    4.23    0.19 
  -1  -3   7    4.51    0.30 
  -1  -3   7    4.32    0.19 
  -1  -3   7    4.41    0.19 
  -2  -2   6    0.56    0.04 
  -3  -1   5   -0.03    0.05 
  -3  -1   5   -0.09    0.09 
  -3  -1   5    0.05    0.04 
  -3  -1   5    0.05    0.05 
   4   0  -4   17.22    0.42 
   4   0  -4   16.50    0.41 
  -4   0   4   16.49    0.48 
  -4   0   4   15.59    0.57 
  -4   0   4   15.91    0.49 
  -4   0   4   16.85    0.50 
   5  -1  -3    0.67    0.13 
  -5   1   3    0.41    0.12 
  -5   1   3    0.58    0.19 
  -5   1   3    0.52    0.15 
   6  -2  -2   25.76    0.81 
  -6   2   2   26.10    0.88 
  -6   2   2   25.57    0.84 
   7  -3  -1    3.36    0.35 
  -7   3   1    3.04    0.37 
  -8   4   0    0.70    0.29 
   2  -6   9    0.12    0.14 
   1  -5   8    6.76    0.38 
   0  -4   7    4.66    0.26 
   0  -4   7    4.76    0.26 
   0  -4   7    4.78    0.34 
   0  -4   7    4.77    0.26 
  -1  -3   6    0.44    0.07 
  -1  -3   6    0.47    0.07 
  -1  -3   6    0.54    0.08 
  -1  -3   6    0.50    0.14 
  -2  -2   5   19.35    0.62 
  -3  -1   4    0.41    0.07 
  -3  -1   4    0.30    0.07 
  -3  -1   4    0.42    0.06 
  -3  -1   4    0.51    0.13 
   4   0  -3    0.11    0.06 
   4   0  -3    0.07    0.05 
  -4   0   3    0.13    0.09 
  -4   0   3    0.13    0.07 
  -4   0   3    0.08    0.08 
  -4   0   3    0.12    0.12 
   5  -1  -2    1.21    0.17 
  -5   1   2    1.27    0.18 
  -5   1   2    1.31    0.24 
  -5   1   2    0.89    0.17 
   6  -2  -1    8.50    0.44 
  -6   2   1    9.18    0.50 
   7  -3   0    0.98    0.21 
  -7   3   0    1.05    0.26 
  -8   4  -1    1.28    0.33 
   2  -6   8    0.24    0.15 
   1  -5   7    5.31    0.33 
   0  -4   6    2.68    0.20 
   0  -4   6    2.95    0.28 
   0  -4   6    2.81    0.20 
   0  -4   6    2.80    0.20 
  -1  -3   5    0.85    0.13 
  -1  -3   5    1.12    0.09 
  -1  -3   5    1.19    0.09 
  -1  -3   5    1.09    0.09 
  -2  -2   4    3.04    0.24 
  -3  -1   3    5.17    0.19 
  -3  -1   3    5.07    0.27 
  -3  -1   3    5.01    0.19 
  -3  -1   3    4.84    0.18 
   4   0  -2    2.44    0.16 
  -4   0   2    2.35    0.17 
  -4   0   2    1.92    0.18 
  -4   0   2    2.50    0.24 
   5  -1  -1    0.14    0.10 
  -5   1   1    0.17    0.11 
  -5   1   1    0.02    0.09 
  -5   1   1    0.07    0.11 
  -5   1   1    0.15    0.16 
   6  -2   0    4.53    0.34 
  -6   2   0    4.88    0.39 
   7  -3   1    1.79    0.27 
  -7   3  -1    1.62    0.29 
   8  -4   2    0.20    0.20 
  -8   4  -2    0.31    0.26 
   2  -6   7    0.38    0.15 
  -1   5  -6   13.01    0.40 
   1  -5   6   13.93    0.52 
   1  -5   6   14.41    0.53 
   1  -5   6   14.67    0.53 
   0   4  -5    0.12    0.03 
   0  -4   5    0.14    0.08 
   0  -4   5    0.14    0.10 
   0  -4   5    0.23    0.08 
   0  -4   5    0.15    0.09 
  -1  -3   4   15.47    0.36 
  -1  -3   4   14.79    0.45 
  -1  -3   4   15.17    0.36 
  -1  -3   4   15.41    0.37 
  -2  -2   3    0.80    0.14 
   3   1  -2    9.70    0.26 
   3   1  -2    9.97    0.25 
   3   1  -2    9.74    0.26 
  -3  -1   2    9.48    0.28 
  -3  -1   2    9.85    0.29 
  -3  -1   2   10.23    0.37 
   4   0  -1   25.55    0.73 
   4   0  -1   23.64    0.63 
   4   0  -1   24.11    0.63 
  -4   0   1   24.55    0.66 
  -4   0   1   24.32    0.70 
  -4   0   1   24.12    0.66 
  -4   0   1   24.83    0.65 
   5  -1   0    3.18    0.25 
  -5   1   0    3.46    0.29 
  -5   1   0    3.15    0.26 
  -5   1   0    3.51    0.28 
   6  -2   1    2.19    0.27 
  -6   2  -1    2.22    0.29 
   7  -3   2    0.19    0.17 
  -7   3  -2    0.15    0.18 
   3  -7   7    0.18    0.15 
   2  -6   6    0.74    0.18 
  -1   5  -5    2.27    0.18 
   1  -5   5    2.34    0.24 
   1  -5   5    2.20    0.23 
   1  -5   5    2.42    0.24 
   0   4  -4    0.17    0.05 
   0   4  -4    0.12    0.05 
   0   4  -4    0.12    0.08 
   0  -4   4    0.08    0.10 
   0  -4   4    0.13    0.07 
   0  -4   4    0.19    0.08 
   0  -4   4    0.16    0.07 
  -1  -3   3   77.45    1.47 
  -1  -3   3   79.70    1.54 
  -1  -3   3   76.16    1.46 
  -1  -3   3   77.37    1.47 
  -2  -2   2  118.80    2.15 
  -2  -2   2  120.39    2.15 
   3   1  -1   34.59    0.74 
   3   1  -1   36.22    0.75 
   3   1  -1   35.67    0.74 
  -3  -1   1   34.06    0.76 
  -3  -1   1   33.92    0.76 
  -3  -1   1   36.13    0.76 
  -3  -1   1   34.76    0.83 
   4   0   0    2.33    0.17 
   4   0   0    2.42    0.18 
   4   0   0    2.23    0.18 
  -4   0   0    2.59    0.19 
  -4   0   0    2.75    0.25 
  -4   0   0    2.23    0.18 
  -4   0   0    1.92    0.18 
   5  -1   1    0.07    0.11 
  -5   1  -1    0.27    0.13 
  -5   1  -1    0.05    0.11 
   6  -2   2    2.67    0.30 
  -6   2  -2    2.58    0.31 
   7  -3   3    3.51    0.39 
  -7   3  -3    3.29    0.40 
   3  -7   6    0.20    0.15 
  -2   6  -5    0.44    0.14 
   2  -6   5    0.42    0.16 
  -1   5  -4    2.02    0.19 
   1  -5   4    2.59    0.24 
   1  -5   4    1.87    0.21 
   1  -5   4    1.90    0.21 
   0   4  -3    3.72    0.17 
   0   4  -3    3.79    0.22 
   0   4  -3    3.70    0.21 
   0   4  -3    3.43    0.17 
   0  -4   3    3.44    0.20 
   0  -4   3    3.51    0.20 
   0  -4   3    3.75    0.20 
   1   3  -2    5.30    0.13 
   1   3  -2    5.25    0.14 
  -1  -3   2    5.23    0.18 
  -1  -3   2    5.29    0.18 
  -1  -3   2    5.17    0.19 
  -1  -3   2    5.28    0.18 
   2   2  -1   40.75    0.77 
  -2  -2   1   40.36    0.80 
  -2  -2   1   41.06    0.80 
  -2  -2   1   41.10    0.80 
   3   1   0    0.10    0.05 
   3   1   0    0.07    0.05 
  -3  -1   0    0.06    0.08 
  -3  -1   0    0.01    0.05 
  -3  -1   0    0.10    0.06 
  -3  -1   0    0.10    0.06 
   4   0   1    0.21    0.10 
   4   0   1    0.11    0.09 
   4   0   1    0.26    0.09 
   4   0   1    0.05    0.07 
  -4   0  -1   -0.01    0.09 
  -4   0  -1    0.17    0.08 
  -4   0  -1    0.08    0.09 
  -4   0  -1    0.15    0.09 
   5  -1   2    6.88    0.37 
  -5   1  -2    6.60    0.38 
   6  -2   3    0.14    0.13 
  -6   2  -3    0.00    0.15 
   7  -3   4   -0.13    0.12 
  -7   3  -4    0.11    0.18 
   3  -7   5    0.23    0.15 
  -2   6  -4   -0.08    0.09 
   2  -6   4   -0.07    0.13 
   2  -6   4   -0.11    0.11 
  -1   5  -3   15.14    0.50 
   1  -5   3   15.22    0.53 
   1  -5   3   15.74    0.53 
   1  -5   3   15.71    0.53 
   0   4  -2   40.09    0.87 
   0   4  -2   40.00    0.89 
   0   4  -2   40.03    0.87 
   0   4  -2   39.36    0.86 
   0  -4   2   38.59    0.89 
   0  -4   2   39.39    0.90 
   0  -4   2   39.72    0.90 
   1   3  -1   12.95    0.31 
   1   3  -1   12.69    0.31 
   1   3  -1   12.61    0.31 
  -1  -3   1   12.83    0.33 
  -1  -3   1   12.76    0.33 
  -1  -3   1   12.78    0.33 
   2   2   0  511.25    8.73 
   2   2   0  493.20    8.88 
   2   2   0  452.07    8.87 
  -2  -2   0  494.01    8.74 
  -2  -2   0  502.72    8.97 
  -2  -2   0  491.52    8.89 
   3   1   1  423.72    7.53 
   3   1   1  412.30    7.53 
   3   1   1  414.96    7.53 
  -3  -1  -1  418.79    7.54 
  -3  -1  -1  420.28    7.54 
  -3  -1  -1  413.20    7.53 
  -3  -1  -1  420.19    7.53 
   4   0   2   83.45    1.74 
   4   0   2   82.08    1.73 
   4   0   2   81.19    1.69 
  -4   0  -2   82.25    1.73 
  -4   0  -2   83.20    1.74 
  -4   0  -2   82.73    1.72 
  -4   0  -2   81.42    1.70 
   5  -1   3   10.03    0.45 
  -5   1  -3   10.13    0.48 
   6  -2   4    0.78    0.19 
  -6   2  -4    0.82    0.21 
   7  -3   5   -0.07    0.14 
  -7   3  -5    0.23    0.21 
  -3   7  -4    1.23    0.23 
   3  -7   4    1.36    0.25 
  -2   6  -3   36.22    0.99 
   2  -6   3   35.90    1.03 
   2  -6   3   34.60    1.01 
  -1   5  -2    6.55    0.33 
  -1   5  -2    6.17    0.31 
   1  -5   2    7.07    0.34 
   1  -5   2    6.93    0.34 
   1  -5   2    7.16    0.34 
   0   4  -1   24.86    0.60 
   0   4  -1   25.25    0.61 
   0   4  -1   24.11    0.61 
   0   4  -1   23.44    0.59 
   0  -4   1   24.52    0.62 
   0  -4   1   24.26    0.62 
   0  -4   1   24.60    0.62 
   1   3   0  294.14    5.30 
   1   3   0  298.72    5.30 
  -1  -3   0  296.46    5.31 
  -1  -3   0  290.10    5.31 
  -1  -3   0  293.51    5.32 
   2   2   1  879.36   15.87 
   2   2   1  871.45   16.12 
   2   2   1  882.31   16.13 
  -2  -2  -1  887.80   16.19 
  -2  -2  -1  872.70   15.84 
  -2  -2  -1  905.74   16.17 
  -2  -2  -1  880.73   16.16 
   3   1   2  186.12    3.49 
   3   1   2  187.20    3.48 
   3   1   2  185.69    3.48 
  -3  -1  -2  187.48    3.48 
  -3  -1  -2  185.23    3.44 
  -3  -1  -2  188.15    3.49 
  -3  -1  -2  183.93    3.48 
  -3  -1  -2  186.76    3.45 
   4   0   3   61.75    1.39 
   4   0   3   63.31    1.41 
   4   0   3   62.89    1.33 
   4   0   3   62.72    1.40 
  -4   0  -3   63.09    1.40 
  -4   0  -3   62.52    1.39 
  -4   0  -3   63.64    1.39 
   5  -1   4    0.27    0.13 
  -5   1  -4    0.30    0.15 
   6  -2   5    2.03    0.28 
  -6   2  -5    2.23    0.31 
   7  -3   6   -0.20    0.14 
  -7   3  -6    0.04    0.18 
   4  -8   4    0.18    0.19 
  -3   7  -3    2.09    0.28 
   3  -7   3    2.05    0.30 
  -2   6  -2    1.19    0.21 
   2  -6   2    1.04    0.19 
   2  -6   2    1.12    0.20 
  -1   5  -1    2.98    0.23 
  -1   5  -1    3.35    0.24 
   1  -5   1    3.14    0.24 
   1  -5   1    3.24    0.23 
   1  -5   1    3.29    0.24 
   0   4   0   27.39    0.68 
   0   4   0   27.28    0.68 
   0  -4   0   28.30    0.69 
   0  -4   0   28.23    0.69 
   0  -4   0   28.11    0.69 
   1   3   1   27.41    0.62 
   1   3   1   27.04    0.62 
   1   3   1   28.20    0.61 
  -1  -3  -1   27.38    0.62 
  -1  -3  -1   28.30    0.63 
  -1  -3  -1   26.65    0.62 
   2   2   2   57.03    1.13 
   2   2   2   55.59    1.13 
   2   2   2   54.97    1.13 
   2   2   2   54.93    1.07 
  -2  -2  -2   54.75    1.07 
  -2  -2  -2   57.52    1.13 
  -2  -2  -2   55.81    1.13 
  -2  -2  -2   55.13    1.13 
   3   1   3    0.28    0.08 
   3   1   3   -0.01    0.06 
   3   1   3   -0.01    0.07 
   3   1   3   -0.01    0.05 
  -3  -1  -3    0.03    0.07 
  -3  -1  -3    0.02    0.06 
  -3  -1  -3   -0.03    0.06 
  -3  -1  -3    0.02    0.05 
  -3  -1  -3    0.01    0.06 
   4   0   4    0.57    0.13 
   4   0   4    0.29    0.10 
   4   0   4    0.54    0.12 
   4   0   4    0.58    0.11 
  -4   0  -4    0.27    0.11 
   5  -1   5    5.53    0.37 
  -5   1  -5    4.91    0.36 
   6  -2   6    0.15    0.14 
  -6   2  -6    0.39    0.19 
   7  -3   7   -0.15    0.15 
  -7   3  -7    0.12    0.20 
   4  -8   3    2.94    0.38 
  -3   7  -2    0.74    0.22 
   3  -7   2    0.67    0.20 
  -2   6  -1    5.88    0.37 
   2  -6   1    5.87    0.38 
   2  -6   1    4.95    0.35 
  -1   5   0    0.70    0.14 
  -1   5   0    0.57    0.14 
   1  -5   0    0.36    0.11 
   1  -5   0    0.39    0.12 
   1  -5   0    0.54    0.12 
   0   4   1   20.42    0.56 
   0   4   1   20.97    0.55 
   0   4   1   20.39    0.56 
   0  -4  -1   20.29    0.55 
   0  -4  -1   20.42    0.56 
   0  -4  -1   20.72    0.56 
   1   3   2    0.54    0.09 
   1   3   2    0.57    0.09 
   1   3   2    0.42    0.08 
  -1  -3  -2    0.51    0.08 
  -1  -3  -2    0.75    0.10 
  -1  -3  -2    0.65    0.09 
   2   2   3   30.96    0.68 
   2   2   3   31.67    0.72 
   2   2   3   31.67    0.72 
   2   2   3   30.92    0.71 
  -2  -2  -3   31.98    0.71 
  -2  -2  -3   31.04    0.71 
  -2  -2  -3   30.45    0.71 
   3   1   4    1.43    0.16 
   3   1   4    1.56    0.17 
   3   1   4    1.54    0.16 
   3   1   4    1.65    0.11 
   3   1   4    1.23    0.14 
  -3  -1  -4    1.64    0.17 
  -3  -1  -4    1.17    0.14 
  -3  -1  -4    1.51    0.16 
  -3  -1  -4    1.52    0.11 
  -3  -1  -4    1.74    0.17 
   4   0   5   11.40    0.47 
   4   0   5   11.08    0.45 
   4   0   5   11.27    0.45 
   4   0   5   11.62    0.38 
  -4   0  -5   12.07    0.46 
   5  -1   6    8.91    0.47 
   5  -1   6    9.52    0.52 
  -5   1  -6    9.35    0.48 
   6  -2   7    0.67    0.19 
  -6   2  -7    0.60    0.21 
  -4   8  -2    3.01    0.40 
   4  -8   2    2.70    0.37 
  -3   7  -1    2.32    0.31 
   3  -7   1    2.01    0.27 
  -2   6   0   45.48    1.19 
  -2   6   0   44.93    1.17 
   2  -6   0   45.47    1.19 
  -1   5   1   36.01    0.93 
  -1   5   1   34.23    0.91 
   1  -5  -1   36.78    0.92 
   1  -5  -1   35.06    0.91 
   1  -5  -1   36.97    0.92 
   0   4   2   91.18    1.80 
   0   4   2   88.76    1.82 
   0   4   2   89.63    1.82 
   0  -4  -2   90.15    1.82 
   0  -4  -2   90.55    1.81 
   0  -4  -2   89.76    1.81 
   1   3   3    0.19    0.06 
   1   3   3    0.17    0.07 
   1   3   3    0.09    0.06 
  -1  -3  -3    0.23    0.08 
  -1  -3  -3    0.20    0.07 
  -1  -3  -3    0.19    0.07 
   2   2   4   25.49    0.64 
   2   2   4   25.71    0.63 
   2   2   4   26.46    0.65 
   2   2   4   26.67    0.65 
  -2  -2  -4   26.25    0.63 
  -2  -2  -4   26.93    0.64 
  -2  -2  -4   25.91    0.64 
   3   1   5    4.41    0.25 
   3   1   5    4.52    0.16 
   3   1   5    4.53    0.26 
   3   1   5    5.60    0.27 
   3   1   5    4.84    0.26 
  -3  -1  -5    4.42    0.24 
  -3  -1  -5    4.47    0.25 
  -3  -1  -5    4.85    0.25 
  -3  -1  -5    4.81    0.24 
   4   0   6   28.65    0.84 
   4   0   6   30.54    0.91 
   4   0   6   29.51    0.70 
   4   0   6   28.72    0.85 
  -4   0  -6   29.46    0.82 
   5  -1   7    0.05    0.15 
   5  -1   7   -0.03    0.11 
  -5   1  -7   -0.04    0.12 
   6  -2   8    0.39    0.17 
  -6   2  -8    0.00    0.16 
  -4   8  -1    0.44    0.25 
   4  -8   1    0.71    0.22 
  -3   7   0    0.92    0.23 
   3  -7   0    1.13    0.22 
  -2   6   1   24.24    0.79 
  -2   6   1   23.21    0.78 
   2  -6  -1   24.39    0.78 
  -1   5   2   12.93    0.48 
  -1   5   2   11.52    0.44 
  -1   5   2   13.13    0.48 
   1  -5  -2   12.38    0.47 
   1  -5  -2   12.12    0.46 
   0   4   3  167.70    3.08 
   0   4   3  159.70    3.09 
   0   4   3  164.92    3.09 
   0  -4  -3  157.78    3.07 
   0  -4  -3  154.67    3.06 
   0  -4  -3  160.84    3.07 
   1   3   4   83.27    1.68 
   1   3   4   83.86    1.66 
   1   3   4   81.46    1.67 
  -1  -3  -4   85.64    1.66 
  -1  -3  -4   84.78    1.67 
  -1  -3  -4   84.03    1.67 
  -1  -3  -4   82.22    1.67 
   2   2   5   39.95    0.93 
   2   2   5   39.86    0.93 
   2   2   5   41.86    0.93 
   2   2   5   40.22    0.93 
  -2  -2  -5   40.22    0.91 
  -2  -2  -5   40.70    0.91 
  -2  -2  -5   40.73    0.91 
   3   1   6    0.01    0.07 
   3   1   6   -0.03    0.08 
   3   1   6    0.08    0.09 
   3   1   6    0.07    0.08 
  -3  -1  -6   -0.01    0.07 
   4   0   7    0.84    0.18 
   4   0   7    0.70    0.15 
   4   0   7    0.79    0.12 
   4   0   7    0.96    0.20 
  -4   0  -7    1.13    0.18 
   5  -1   8    5.39    0.39 
   5  -1   8    5.36    0.42 
  -5   1  -8    4.49    0.36 
   6  -2   9    0.85    0.23 
  -4   8   0    0.79    0.27 
   4  -8   0    0.55    0.21 
  -3   7   1    0.77    0.22 
  -3   7   1    0.33    0.17 
   3  -7  -1    0.01    0.14 
  -2   6   2    4.31    0.35 
  -2   6   2    4.88    0.35 
   2  -6  -2    3.97    0.30 
  -1   5   3   24.07    0.69 
  -1   5   3   23.49    0.71 
  -1   5   3   22.75    0.69 
   1  -5  -3   22.70    0.68 
   0   4   4   12.14    0.43 
   0   4   4   11.29    0.40 
   0  -4  -4   12.16    0.41 
   0  -4  -4   11.92    0.41 
   0  -4  -4   12.17    0.41 
   1   3   5    0.19    0.08 
   1   3   5    0.04    0.05 
   1   3   5    0.07    0.07 
   1   3   5    0.06    0.07 
  -1  -3  -5    0.03    0.07 
  -1  -3  -5    0.12    0.07 
  -1  -3  -5    0.01    0.06 
  -1  -3  -5    0.02    0.06 
   2   2   6   56.48    1.25 
   2   2   6   57.23    1.26 
   2   2   6   57.20    1.25 
   2   2   6   55.07    1.27 
  -2  -2  -6   58.46    1.22 
  -2  -2  -6   56.68    1.23 
  -2  -2  -6   57.24    1.22 
   3   1   7   14.57    0.52 
   3   1   7   15.96    0.57 
   3   1   7   15.21    0.53 
   3   1   7   15.52    0.53 
  -3  -1  -7   14.49    0.49 
   4   0   8   10.01    0.52 
   4   0   8    9.30    0.46 
   4   0   8    9.89    0.49 
   4   0   8    9.54    0.31 
  -4   0  -8   10.36    0.44 
   5  -1   9    0.24    0.17 
   5  -1   9    0.19    0.16 
  -5   1  -9    0.18    0.15 
   6  -2  10    0.58    0.20 
  -4   8   1    2.84    0.39 
   4  -8  -1    2.51    0.34 
  -3   7   2    1.21    0.25 
  -3   7   2    1.51    0.26 
   3  -7  -2    1.71    0.27 
  -2   6   3    4.02    0.32 
  -2   6   3    3.71    0.34 
   2  -6  -3    3.88    0.30 
  -1   5   4    3.15    0.24 
  -1   5   4    3.05    0.26 
  -1   5   4    3.55    0.26 
   1  -5  -4    3.14    0.24 
   0   4   5   58.01    1.27 
   0   4   5   56.06    1.29 
   0   4   5   58.48    1.30 
   0  -4  -5   57.44    1.28 
   0  -4  -5   59.02    1.38 
   0  -4  -5   58.69    1.27 
   1   3   6    0.51    0.12 
   1   3   6    0.68    0.12 
   1   3   6    0.40    0.11 
  -1  -3  -6    0.59    0.08 
  -1  -3  -6    0.53    0.10 
  -1  -3  -6    0.64    0.12 
  -1  -3  -6    0.36    0.10 
  -1  -3  -6    0.81    0.11 
   2   2   7    0.31    0.10 
   2   2   7    0.32    0.12 
   2   2   7    0.21    0.10 
   2   2   7    0.42    0.11 
  -2  -2  -7    0.34    0.09 
  -2  -2  -7    0.24    0.09 
   3   1   8    5.42    0.32 
   3   1   8    5.35    0.35 
   3   1   8    5.66    0.32 
   3   1   8    5.14    0.32 
  -3  -1  -8    5.14    0.28 
   4   0   9    5.34    0.47 
   4   0   9    5.26    0.38 
   4   0   9    5.09    0.35 
  -4   0  -9    4.99    0.32 
   5  -1  10   -0.08    0.15 
   5  -1  10    0.04    0.13 
  -4   8   2    0.74    0.26 
  -4   8   2    0.59    0.23 
   4  -8  -2    0.55    0.21 
  -3   7   3    1.06    0.25 
  -3   7   3    1.33    0.27 
   3  -7  -3    0.75    0.19 
  -2   6   4    0.18    0.16 
  -2   6   4    0.34    0.18 
   2  -6  -4    0.13    0.12 
  -1   5   5    3.10    0.25 
  -1   5   5    2.53    0.25 
  -1   5   5    3.28    0.28 
   1  -5  -5    3.00    0.24 
   0   4   6    0.23    0.11 
   0   4   6    0.48    0.11 
   0   4   6    0.36    0.12 
   0  -4  -6    0.15    0.09 
   0  -4  -6    0.21    0.09 
   0  -4  -6    0.37    0.10 
   1   3   7    0.18    0.10 
   1   3   7    0.08    0.08 
   1   3   7    0.20    0.09 
  -1  -3  -7    0.18    0.08 
  -1  -3  -7    0.14    0.05 
  -1  -3  -7    0.01    0.06 
   2   2   8   13.35    0.50 
   2   2   8   14.43    0.55 
   2   2   8   13.83    0.49 
   2   2   8   13.80    0.49 
  -2  -2  -8   14.37    0.45 
   3   1   9    0.20    0.13 
   3   1   9    0.07    0.11 
   3   1   9    0.08    0.15 
   3   1   9    0.07    0.10 
  -3  -1  -9    0.17    0.09 
   4   0  10    0.20    0.14 
   4   0  10    0.00    0.16 
   4   0  10    0.26    0.15 
  -4   0 -10    0.22    0.11 
   5  -1  11    3.48    0.41 
   5  -1  11    3.47    0.38 
  -4   8   3    1.70    0.35 
  -4   8   3    1.82    0.33 
   4  -8  -3    1.87    0.31 
  -3   7   4   33.98    1.10 
  -3   7   4   31.66    1.05 
   3  -7  -4   31.59    1.02 
  -2   6   5    5.07    0.39 
  -2   6   5    6.22    0.42 
   2  -6  -5    5.29    0.36 
  -1   5   6    0.09    0.10 
  -1   5   6   -0.05    0.12 
  -1   5   6    0.01    0.12 
   1  -5  -6    0.05    0.09 
   0   4   7    3.89    0.27 
   0   4   7    3.80    0.28 
   0   4   7    3.15    0.23 
   0  -4  -7    3.72    0.25 
   0  -4  -7    4.02    0.24 
   0  -4  -7    4.03    0.23 
   1   3   8    0.02    0.09 
   1   3   8   -0.05    0.08 
   1   3   8   -0.02    0.09 
  -1  -3  -8   -0.06    0.07 
  -1  -3  -8    0.02    0.05 
   2   2   9    0.93    0.20 
   2   2   9    1.36    0.19 
   2   2   9    0.95    0.16 
   2   2   9    1.14    0.18 
  -2  -2  -9    1.04    0.13 
  -2  -2  -9    1.29    0.15 
   3   1  10    1.83    0.28 
   3   1  10    1.46    0.22 
   3   1  10    1.26    0.25 
   3   1  10    1.47    0.23 
  -3  -1 -10    1.43    0.17 
  -3  -1 -10    1.73    0.18 
   4   0  11    0.04    0.13 
   4   0  11    0.12    0.16 
   4   0  11    0.17    0.19 
   5  -1  12    0.43    0.20 
   5  -1  12    0.67    0.26 
  -4   8   4   -0.05    0.19 
  -4   8   4   -0.14    0.19 
   4  -8  -4    0.20    0.16 
  -3   7   5    1.90    0.33 
  -3   7   5    1.24    0.27 
   3  -7  -5    1.25    0.23 
  -2   6   6    0.71    0.20 
  -2   6   6    0.67    0.20 
   2  -6  -6    0.30    0.15 
  -1   5   7   16.73    0.62 
  -1   5   7   17.87    0.64 
  -1   5   7   16.29    0.58 
   1  -5  -7   15.83    0.56 
   1  -5  -7   16.84    0.59 
   0   4   8   34.73    0.94 
   0   4   8   35.86    0.95 
   0   4   8   35.80    0.92 
   0  -4  -8   34.69    0.84 
   0  -4  -8   36.06    0.89 
   1   3   9    0.73    0.16 
   1   3   9    0.73    0.15 
   1   3   9    0.68    0.16 
  -1  -3  -9    0.86    0.13 
  -1  -3  -9    0.60    0.12 
   2   2  10    3.71    0.38 
   2   2  10    3.43    0.32 
   2   2  10    4.05    0.31 
   2   2  10    3.38    0.28 
  -2  -2 -10    3.58    0.22 
  -2  -2 -10    3.79    0.23 
   3   1  11    2.92    0.31 
   3   1  11    2.98    0.30 
   3   1  11    3.55    0.41 
   4   0  12    6.00    0.57 
   4   0  12    5.35    0.42 
   4   0  12    5.54    0.45 
  -4   8   5    1.10    0.30 
  -4   8   5    2.54    0.38 
  -3   7   6    2.90    0.36 
  -3   7   6    2.44    0.35 
   3  -7  -6    2.52    0.30 
  -2   6   7    3.42    0.32 
  -2   6   7    3.82    0.37 
  -2   6   7    3.15    0.34 
   2  -6  -7    3.19    0.30 
  -1   5   8    2.49    0.28 
  -1   5   8    2.90    0.29 
  -1   5   8    3.28    0.30 
   1  -5  -8    3.40    0.28 
   1  -5  -8    3.82    0.27 
   0   4   9    4.52    0.32 
   0   4   9    5.28    0.32 
   0   4   9    4.59    0.33 
   0  -4  -9    4.81    0.25 
   0  -4  -9    4.89    0.28 
   0  -4  -9    4.74    0.27 
   1   3  10    2.84    0.29 
   1   3  10    3.48    0.29 
   1   3  10    3.25    0.30 
  -1  -3 -10    3.50    0.22 
  -1  -3 -10    3.20    0.21 
   2   2  11   11.46    0.59 
   2   2  11   11.13    0.50 
   2   2  11   11.43    0.52 
   3   1  12    2.61    0.31 
   3   1  12    2.62    0.31 
   3   1  12    2.72    0.38 
   4   0  13    0.29    0.17 
   4   0  13    0.27    0.20 
   4   0  13    0.38    0.25 
  -4   8   6    2.96    0.41 
  -4   8   6    3.34    0.47 
  -3   7   7    3.90    0.43 
  -3   7   7    3.93    0.40 
  -2   6   8    3.31    0.37 
  -2   6   8    2.46    0.31 
   2  -6  -8    2.81    0.29 
   2  -6  -8    3.05    0.31 
  -1   5   9    5.72    0.36 
  -1   5   9    5.45    0.38 
  -1   5   9    5.77    0.39 
   1  -5  -9    4.73    0.31 
   0   4  10   22.17    0.75 
   0   4  10   22.08    0.73 
   0  -4 -10   23.47    0.65 
   0  -4 -10   22.46    0.63 
   1   3  11    7.71    0.42 
   1   3  11    8.02    0.43 
   2   2  12    1.08    0.21 
   2   2  12    0.89    0.19 
   2   2  12    0.77    0.25 
   3   1  13    1.17    0.24 
   3   1  13    1.17    0.29 
   3   1  13    0.93    0.23 
  -4   8   7    0.42    0.25 
  -4   8   7    0.32    0.24 
  -3   7   8    1.54    0.31 
  -3   7   8    1.82    0.30 
  -2   6   9    0.54    0.20 
  -2   6   9    0.74    0.21 
   2  -6  -9    1.20    0.20 
  -1   5  10    3.69    0.35 
  -1   5  10    4.76    0.37 
   1  -5 -10    4.75    0.33 
   0   4  11    1.16    0.20 
   0   4  11    1.52    0.23 
   1   3  12    1.82    0.26 
   1   3  12    1.94    0.25 
   2   2  13    2.19    0.28 
   2   2  13    2.16    0.36 
   2   2  13    2.32    0.30 
   3   1  14    1.75    0.37 
   3   1  14    0.71    0.24 
   3   1  14    1.28    0.25 
  -3   7   9    0.13    0.21 
  -3   7   9   -0.19    0.17 
  -2   6  10    0.96    0.22 
  -2   6  10    0.67    0.22 
  -1   5  11    0.01    0.14 
  -1   5  11    0.05    0.15 
   0   4  12    0.09    0.13 
   0   4  12    0.19    0.16 
   1   3  13   -0.03    0.12 
   1   3  13   -0.08    0.12 
   1   3  13    0.17    0.20 
   2   2  14    0.13    0.16 
   2   2  14   -0.31    0.11 
   2   2  14    0.16    0.20 
  -3   7  10    0.27    0.22 
  -3   7  10    0.09    0.19 
  -2   6  11    0.72    0.24 
  -2   6  11    0.86    0.24 
  -1   5  12    2.36    0.32 
  -1   5  12    1.51    0.26 
   0   4  13    0.14    0.15 
   0   4  13    0.28    0.16 
   1   3  14   -0.02    0.14 
   1   3  14   -0.25    0.13 
   1   3  14   -0.19    0.18 
  -2   6  12    0.90    0.25 
  -2   6  12    1.25    0.28 
  -1   5  13    0.77    0.24 
  -1   5  13    0.27    0.20 
   0   4  14    3.19    0.37 
   0   4  14    2.96    0.36 
  -5   0  11    0.12    0.18 
  -5   0  11    0.17    0.12 
  -5   0  11    0.10    0.12 
  -6   1  10   -0.02    0.21 
  -6   1  10   -0.14    0.13 
  -6   1  10    0.13    0.16 
  -3  -2  12   -0.25    0.15 
  -3  -2  12    0.19    0.19 
  -3  -2  12    0.02    0.07 
  -4  -1  11    0.66    0.22 
  -4  -1  11    0.49    0.11 
  -4  -1  11    0.56    0.12 
  -5   0  10    0.72    0.16 
  -5   0  10    0.99    0.25 
  -5   0  10    1.12    0.18 
  -6   1   9    0.51    0.18 
  -6   1   9    0.36    0.23 
  -6   1   9    0.68    0.20 
  -7   2   8    0.05    0.16 
  -2  -3  12    1.06    0.28 
  -2  -3  12    0.88    0.17 
  -2  -3  12    1.21    0.13 
  -3  -2  11    0.39    0.19 
  -3  -2  11    0.54    0.18 
  -3  -2  11    0.39    0.09 
  -3  -2  11    0.40    0.09 
  -4  -1  10    6.25    0.44 
  -4  -1  10    5.26    0.26 
  -4  -1  10    5.17    0.27 
  -5   0   9    0.14    0.12 
  -5   0   9   -0.13    0.10 
  -5   0   9    0.21    0.19 
  -6   1   8    0.38    0.21 
  -6   1   8    0.60    0.17 
  -6   1   8    0.52    0.17 
  -7   2   7   -0.04    0.16 
  -2  -3  11    0.15    0.13 
  -2  -3  11    0.26    0.09 
  -2  -3  11    0.18    0.18 
  -2  -3  11    0.24    0.08 
  -3  -2  10   -0.05    0.06 
  -3  -2  10    0.11    0.14 
  -3  -2  10    0.04    0.06 
  -4  -1   9    3.47    0.35 
  -4  -1   9    3.69    0.20 
  -4  -1   9    3.55    0.21 
  -4  -1   9    3.79    0.22 
  -5   0   8    5.68    0.33 
  -5   0   8    5.69    0.34 
  -5   0   8    5.49    0.42 
  -6   1   7    4.06    0.33 
  -6   1   7    3.68    0.35 
  -6   1   7    3.67    0.41 
  -7   2   6    2.72    0.36 
  -1  -4  11    0.47    0.20 
  -1  -4  11    0.14    0.09 
  -2  -3  10    0.66    0.10 
  -2  -3  10    0.72    0.21 
  -2  -3  10    0.69    0.09 
  -3  -2   9    0.16    0.06 
  -3  -2   9    0.20    0.15 
  -3  -2   9    0.17    0.06 
  -4  -1   8    4.10    0.21 
  -4  -1   8    4.80    0.37 
  -4  -1   8    4.55    0.23 
  -4  -1   8    4.61    0.23 
  -5   0   7    5.49    0.32 
  -5   0   7    5.78    0.31 
  -5   0   7    5.35    0.31 
  -5   0   7    5.69    0.42 
  -6   1   6    3.08    0.39 
  -6   1   6    2.75    0.29 
  -6   1   6    3.90    0.34 
  -7   2   5   -0.06    0.14 
  -8   3   4    0.83    0.27 
   0  -5  11    0.91    0.27 
   0  -5  11    1.04    0.18 
  -1  -4  10    0.12    0.08 
  -1  -4  10    0.21    0.18 
  -2  -3   9    0.00    0.05 
  -2  -3   9    0.01    0.12 
  -2  -3   9   -0.02    0.05 
  -2  -3   9    0.00    0.04 
  -3  -2   8   22.99    0.74 
  -3  -2   8   21.89    0.49 
  -3  -2   8   22.88    0.49 
  -3  -2   8   23.15    0.50 
  -4  -1   7   17.16    0.47 
  -4  -1   7   17.07    0.48 
  -4  -1   7   17.80    0.66 
  -4  -1   7   16.61    0.47 
  -5   0   6    1.89    0.21 
  -5   0   6    2.09    0.22 
  -5   0   6    2.43    0.22 
  -5   0   6    2.21    0.29 
  -6   1   5   -0.03    0.17 
  -6   1   5   -0.14    0.10 
  -7   2   4    0.56    0.21 
  -8   3   3   -0.23    0.19 
   0  -5  10    5.50    0.33 
   0  -5  10    5.65    0.45 
  -1  -4   9    1.94    0.28 
  -1  -4   9    2.12    0.18 
  -1  -4   9    1.81    0.17 
  -2  -3   8    5.00    0.34 
  -2  -3   8    4.62    0.17 
  -2  -3   8    5.17    0.18 
  -2  -3   8    4.69    0.17 
  -3  -2   7    3.22    0.13 
  -3  -2   7    3.32    0.13 
  -3  -2   7    3.35    0.12 
  -3  -2   7    3.49    0.31 
  -4  -1   6    8.07    0.30 
  -4  -1   6    7.78    0.29 
  -4  -1   6    7.76    0.28 
  -4  -1   6    8.01    0.43 
   5   0  -5    4.47    0.19 
  -5   0   5    4.37    0.28 
  -5   0   5    4.44    0.26 
  -5   0   5    4.64    0.37 
  -5   0   5    4.47    0.29 
   6  -1  -4    1.14    0.17 
  -6   1   4    1.62    0.28 
  -6   1   4    1.52    0.26 
  -7   2   3    0.39    0.20 
  -8   3   2    0.07    0.20 
   1  -6  10    0.03    0.14 
   0  -5   9    0.29    0.11 
   0  -5   9    0.50    0.22 
  -1  -4   8    3.51    0.20 
  -1  -4   8    3.45    0.21 
  -1  -4   8    3.53    0.20 
  -1  -4   8    4.20    0.32 
  -2  -3   7   12.13    0.28 
  -2  -3   7   11.66    0.28 
  -2  -3   7   12.02    0.28 
  -2  -3   7   11.80    0.49 
  -3  -2   6    0.77    0.07 
  -3  -2   6    0.68    0.06 
  -3  -2   6    0.77    0.06 
  -4  -1   5    0.83    0.11 
  -4  -1   5    0.66    0.18 
  -4  -1   5    1.11    0.13 
  -4  -1   5    1.05    0.13 
   5   0  -4    9.09    0.32 
  -5   0   4    8.64    0.38 
  -5   0   4    8.71    0.37 
  -5   0   4    8.95    0.47 
   6  -1  -3    6.75    0.35 
  -6   1   3    6.24    0.40 
  -6   1   3    7.02    0.46 
  -6   1   3    5.99    0.37 
   7  -2  -2    0.17    0.15 
  -7   2   2    0.07    0.18 
  -8   3   1    0.44    0.24 
   1  -6   9   -0.08    0.11 
   0  -5   8    5.94    0.41 
   0  -5   8    6.10    0.33 
  -1  -4   7    2.93    0.18 
  -1  -4   7    2.89    0.18 
  -1  -4   7    3.74    0.33 
  -1  -4   7    2.76    0.17 
  -2  -3   6    0.90    0.06 
  -2  -3   6    0.88    0.06 
  -2  -3   6    0.92    0.17 
  -2  -3   6    0.83    0.06 
  -3  -2   5    1.90    0.09 
  -3  -2   5    1.98    0.09 
  -3  -2   5    1.94    0.09 
  -4  -1   4    0.03    0.12 
  -4  -1   4    0.02    0.06 
  -4  -1   4   -0.05    0.07 
  -4  -1   4    0.05    0.05 
   5   0  -3    0.70    0.12 
  -5   0   3    0.66    0.18 
  -5   0   3    0.68    0.14 
  -5   0   3    0.74    0.14 
   6  -1  -2    7.32    0.38 
  -6   1   2    8.23    0.44 
  -6   1   2    7.36    0.41 
  -6   1   2    6.87    0.47 
   7  -2  -1    0.09    0.13 
  -7   2   1    0.15    0.18 
  -8   3   0    0.07    0.20 
   1  -6   8    1.67    0.24 
   0  -5   7    4.84    0.29 
   0  -5   7    5.03    0.30 
   0  -5   7    5.10    0.36 
  -1  -4   6    4.97    0.22 
  -1  -4   6    5.07    0.22 
  -1  -4   6    4.89    0.30 
  -1  -4   6    4.74    0.22 
  -2  -3   5    3.09    0.10 
  -2  -3   5    3.20    0.21 
  -3  -2   4    0.06    0.03 
  -3  -2   4   -0.01    0.04 
  -3  -2   4    0.03    0.03 
   4   1  -3   25.25    0.55 
   4   1  -3   24.15    0.53 
   4   1  -3   24.48    0.54 
  -4  -1   3   24.35    0.72 
  -4  -1   3   24.59    0.61 
  -4  -1   3   24.51    0.61 
   5   0  -2    2.88    0.20 
  -5   0   2    3.29    0.25 
  -5   0   2    2.99    0.24 
  -5   0   2    3.08    0.31 
  -5   0   2    2.88    0.22 
   6  -1  -1    3.45    0.30 
  -6   1   1    2.63    0.33 
  -6   1   1    3.38    0.31 
   7  -2   0    0.04    0.13 
  -7   2   0    0.09    0.17 
   8  -3   1    1.85    0.32 
  -8   3  -1    1.46    0.32 
   2  -7   8    0.39    0.18 
   1  -6   7    2.24    0.26 
   0  -5   6   30.65    0.81 
   0  -5   6   31.84    0.82 
   0  -5   6   31.35    0.82 
  -1  -4   5    4.62    0.21 
  -1  -4   5    4.42    0.20 
  -1  -4   5    4.43    0.26 
  -1  -4   5    4.62    0.20 
  -2  -3   4   12.91    0.28 
  -2  -3   4   12.95    0.27 
  -2  -3   4   13.10    0.40 
  -2  -3   4   13.30    0.28 
  -3  -2   3    4.42    0.15 
  -3  -2   3    4.39    0.15 
   4   1  -2    3.66    0.17 
   4   1  -2    3.91    0.19 
   4   1  -2    4.02    0.18 
  -4  -1   2    4.07    0.20 
  -4  -1   2    3.75    0.21 
  -4  -1   2    4.18    0.27 
  -4  -1   2    3.68    0.21 
   5   0  -1    1.73    0.18 
  -5   0   1    1.85    0.21 
  -5   0   1    1.62    0.19 
  -5   0   1    1.53    0.22 
  -5   0   1    2.38    0.22 
   6  -1   0    5.42    0.35 
  -6   1   0    5.44    0.36 
  -6   1   0    5.21    0.38 
  -6   1   0    5.17    0.39 
   7  -2   1    1.69    0.25 
  -7   2  -1    2.32    0.33 
   8  -3   2    0.18    0.18 
  -8   3  -2    0.16    0.21 
   2  -7   7    0.32    0.16 
   1  -6   6    6.84    0.39 
   0   5  -5    0.01    0.04 
   0   5  -5    0.03    0.04 
   0  -5   5    0.00    0.08 
   0  -5   5    0.08    0.09 
   0  -5   5    0.00    0.09 
  -1  -4   4    5.13    0.21 
  -1  -4   4    5.47    0.22 
  -1  -4   4    5.13    0.21 
  -1  -4   4    5.19    0.26 
  -2  -3   3   18.81    0.39 
  -2  -3   3   18.47    0.47 
  -2  -3   3   18.64    0.39 
  -3  -2   2   46.56    0.94 
  -3  -2   2   47.03    0.93 
  -3  -2   2   47.31    0.94 
   4   1  -1    3.40    0.19 
   4   1  -1    3.68    0.19 
  -4  -1   1    3.47    0.19 
  -4  -1   1    3.14    0.19 
  -4  -1   1    3.31    0.20 
  -4  -1   1    3.63    0.24 
   5   0   0    3.25    0.24 
  -5   0   0    3.38    0.24 
  -5   0   0    3.48    0.25 
  -5   0   0    3.40    0.26 
  -5   0   0    2.73    0.27 
   6  -1   1    0.30    0.15 
  -6   1  -1    0.38    0.18 
   7  -2   2    0.38    0.17 
  -7   2  -2    0.64    0.23 
   8  -3   3    0.70    0.23 
  -8   3  -3    0.57    0.27 
   2  -7   6    0.14    0.14 
  -1   6  -5    1.47    0.17 
   1  -6   5    1.07    0.19 
   1  -6   5    1.34    0.22 
   0   5  -4    0.44    0.12 
   0  -5   4    0.67    0.13 
   0  -5   4    0.76    0.13 
   0  -5   4    0.69    0.12 
   1   4  -3   13.51    0.28 
   1   4  -3   13.57    0.28 
  -1  -4   3   13.46    0.38 
  -1  -4   3   13.92    0.38 
  -1  -4   3   13.38    0.40 
  -1  -4   3   13.86    0.38 
  -2  -3   2    0.03    0.03 
  -2  -3   2   -0.04    0.03 
  -2  -3   2    0.11    0.04 
   3   2  -1   15.33    0.36 
   3   2  -1   15.21    0.35 
   3   2  -1   14.80    0.35 
  -3  -2   1   14.42    0.38 
  -3  -2   1   13.97    0.37 
  -3  -2   1   14.96    0.38 
   4   1   0   16.76    0.48 
   4   1   0   17.00    0.48 
   4   1   0   17.34    0.48 
  -4  -1   0   17.15    0.49 
  -4  -1   0   16.96    0.53 
  -4  -1   0   17.56    0.51 
  -4  -1   0   16.89    0.50 
   5   0   1    0.93    0.16 
  -5   0  -1    0.95    0.17 
  -5   0  -1    0.84    0.18 
  -5   0  -1    1.14    0.17 
  -5   0  -1    1.37    0.21 
   6  -1   2    0.19    0.13 
  -6   1  -2    0.18    0.15 
   7  -2   3    0.75    0.20 
  -7   2  -3    0.59    0.22 
   8  -3   4    0.49    0.21 
  -8   3  -4    0.70    0.27 
   3  -8   6    1.39    0.28 
   2  -7   5    1.89    0.28 
  -1   6  -4   51.60    1.19 
   1  -6   4   51.04    1.28 
   1  -6   4   51.60    1.27 
   1  -6   4   50.81    1.27 
   0   5  -3   13.22    0.44 
   0   5  -3   12.30    0.39 
   0  -5   3   13.41    0.45 
   0  -5   3   12.81    0.44 
   0  -5   3   12.96    0.44 
   1   4  -2    0.25    0.07 
   1   4  -2    0.35    0.06 
   1   4  -2    0.35    0.06 
  -1  -4   2    0.33    0.07 
  -1  -4   2    0.37    0.07 
  -1  -4   2    0.41    0.07 
   2   3  -1   40.01    0.76 
  -2  -3   1   38.65    0.79 
  -2  -3   1   39.42    0.79 
  -2  -3   1   39.05    0.75 
   3   2   0    3.69    0.17 
   3   2   0    3.81    0.17 
  -3  -2   0    3.62    0.18 
  -3  -2   0    3.77    0.17 
  -3  -2   0    3.38    0.17 
   4   1   1   72.83    1.51 
   4   1   1   71.09    1.51 
   4   1   1   73.37    1.52 
  -4  -1  -1   73.20    1.52 
  -4  -1  -1   74.21    1.52 
  -4  -1  -1   71.31    1.52 
  -4  -1  -1   72.09    1.53 
   5   0   2    0.05    0.10 
  -5   0  -2    0.15    0.13 
  -5   0  -2    0.21    0.13 
  -5   0  -2    0.17    0.10 
   6  -1   3    0.82    0.19 
  -6   1  -3    0.96    0.22 
   7  -2   4    1.92    0.28 
  -7   2  -4    2.10    0.33 
   8  -3   5    0.32    0.21 
  -8   3  -5    0.37    0.24 
   3  -8   5    0.54    0.21 
  -2   7  -4    5.26    0.35 
   2  -7   4    5.67    0.40 
  -1   6  -3    5.06    0.30 
   1  -6   3    5.12    0.33 
   1  -6   3    5.19    0.34 
   1  -6   3    4.96    0.32 
   0   5  -2    1.15    0.14 
   0   5  -2    1.16    0.15 
   0  -5   2    1.00    0.14 
   0  -5   2    0.83    0.13 
   0  -5   2    0.99    0.13 
   1   4  -1    0.95    0.10 
   1   4  -1    1.18    0.10 
   1   4  -1    1.10    0.10 
   1   4  -1    1.15    0.10 
  -1  -4   1    1.07    0.11 
  -1  -4   1    1.11    0.11 
  -1  -4   1    1.23    0.12 
   2   3   0   41.60    0.85 
   2   3   0   43.28    0.85 
  -2  -3   0   41.50    0.86 
  -2  -3   0   42.04    0.87 
   3   2   1   47.53    0.99 
   3   2   1   47.57    0.99 
  -3  -2  -1   45.54    0.99 
  -3  -2  -1   47.78    0.99 
  -3  -2  -1   45.13    0.99 
   4   1   2    3.36    0.22 
   4   1   2    3.13    0.20 
   4   1   2    2.73    0.20 
   4   1   2    3.08    0.19 
  -4  -1  -2    2.67    0.20 
  -4  -1  -2    2.84    0.20 
  -4  -1  -2    2.80    0.21 
  -4  -1  -2    2.82    0.20 
  -4  -1  -2    2.95    0.20 
   5   0   3   11.87    0.48 
  -5   0  -3   12.36    0.50 
   6  -1   4    0.80    0.19 
  -6   1  -4    0.60    0.19 
   7  -2   5    2.30    0.32 
  -7   2  -5    2.27    0.34 
   3  -8   4    0.56    0.21 
  -2   7  -3   18.93    0.69 
   2  -7   3   19.29    0.73 
  -1   6  -2    7.90    0.38 
   1  -6   2    8.13    0.41 
   1  -6   2    8.08    0.40 
   1  -6   2    8.41    0.41 
   0   5  -1   23.76    0.62 
   0   5  -1   22.66    0.62 
   0   5  -1   22.20    0.60 
   0  -5   1   22.58    0.63 
   0  -5   1   22.30    0.63 
   0  -5   1   22.84    0.64 
   1   4   0   16.11    0.43 
   1   4   0   16.30    0.42 
   1   4   0   15.37    0.42 
  -1  -4   0   16.57    0.44 
  -1  -4   0   15.80    0.44 
  -1  -4   0   15.34    0.43 
   2   3   1   11.27    0.23 
   2   3   1   11.59    0.33 
   2   3   1   11.34    0.33 
  -2  -3  -1   11.22    0.34 
  -2  -3  -1   11.50    0.33 
  -2  -3  -1   12.04    0.33 
   3   2   2  204.76    3.88 
   3   2   2  212.78    3.88 
   3   2   2  208.58    3.88 
  -3  -2  -2  212.04    3.89 
  -3  -2  -2  210.26    3.88 
  -3  -2  -2  208.63    3.82 
  -3  -2  -2  209.86    3.89 
   4   1   3   28.38    0.73 
   4   1   3   28.53    0.74 
   4   1   3   26.57    0.66 
   4   1   3   25.67    0.71 
  -4  -1  -3   27.65    0.68 
  -4  -1  -3   26.63    0.73 
  -4  -1  -3   26.73    0.70 
  -4  -1  -3   26.42    0.72 
  -4  -1  -3   27.94    0.72 
   5   0   4    0.72    0.15 
   5   0   4    0.66    0.16 
  -5   0  -4    0.57    0.16 
   6  -1   5    2.64    0.30 
  -6   1  -5    2.74    0.32 
   7  -2   6    0.16    0.15 
  -7   2  -6    0.29    0.20 
  -3   8  -3    0.23    0.21 
   3  -8   3    0.41    0.19 
  -2   7  -2    2.66    0.30 
   2  -7   2    2.50    0.29 
  -1   6  -1    2.61    0.25 
  -1   6  -1    3.40    0.28 
   1  -6   1    2.73    0.25 
   1  -6   1    3.33    0.29 
   1  -6   1    4.08    0.38 
   0   5   0    0.29    0.09 
   0   5   0    0.06    0.08 
   0   5   0    0.19    0.10 
   0  -5   0    0.18    0.09 
   0  -5   0    0.13    0.08 
   0  -5   0    0.31    0.09 
   1   4   1    0.06    0.06 
   1   4   1    0.02    0.05 
   1   4   1   -0.02    0.06 
  -1  -4  -1   -0.04    0.05 
  -1  -4  -1    0.00    0.06 
  -1  -4  -1    0.03    0.06 
   2   3   2   88.46    1.69 
   2   3   2   83.95    1.68 
   2   3   2   87.15    1.69 
  -2  -3  -2   84.36    1.68 
  -2  -3  -2   84.91    1.69 
  -2  -3  -2   86.83    1.68 
   3   2   3   17.92    0.50 
   3   2   3   17.97    0.51 
   3   2   3   17.85    0.50 
   3   2   3   18.14    0.47 
  -3  -2  -3   18.50    0.51 
  -3  -2  -3   17.89    0.44 
  -3  -2  -3   17.70    0.49 
  -3  -2  -3   18.30    0.47 
  -3  -2  -3   18.62    0.51 
   4   1   4    3.76    0.26 
   4   1   4    4.13    0.20 
   4   1   4    3.93    0.25 
   4   1   4    4.28    0.26 
  -4  -1  -4    4.06    0.24 
  -4  -1  -4    4.23    0.21 
  -4  -1  -4    3.84    0.24 
  -4  -1  -4    4.20    0.26 
   5   0   5    2.45    0.25 
   5   0   5    2.76    0.29 
  -5   0  -5    2.85    0.27 
   6  -1   6    2.09    0.28 
  -6   1  -6    2.01    0.29 
   7  -2   7   -0.06    0.13 
  -7   2  -7    0.13    0.18 
  -3   8  -2    1.32    0.27 
   3  -8   2    1.54    0.28 
  -2   7  -1   22.07    0.77 
   2  -7   1   21.16    0.77 
  -1   6   0    4.09    0.30 
  -1   6   0    4.56    0.31 
   1  -6   0    4.64    0.31 
   1  -6   0    4.50    0.31 
   0   5   1    8.34    0.33 
   0   5   1    8.62    0.36 
   0   5   1    8.07    0.34 
   0  -5  -1    8.86    0.36 
   0  -5  -1    8.51    0.35 
   0  -5  -1    9.12    0.36 
   1   4   2    2.00    0.14 
   1   4   2    1.37    0.14 
   1   4   2    2.16    0.17 
  -1  -4  -2    2.04    0.16 
  -1  -4  -2    2.05    0.16 
  -1  -4  -2    2.05    0.16 
   2   3   3    7.16    0.27 
   2   3   3    6.67    0.27 
   2   3   3    7.06    0.27 
  -2  -3  -3    6.90    0.28 
  -2  -3  -3    6.97    0.27 
  -2  -3  -3    7.32    0.27 
   3   2   4   24.28    0.65 
   3   2   4   24.77    0.64 
   3   2   4   23.69    0.61 
   3   2   4   24.76    0.64 
  -3  -2  -4   23.90    0.63 
  -3  -2  -4   24.90    0.65 
  -3  -2  -4   24.49    0.64 
  -3  -2  -4   23.48    0.60 
  -3  -2  -4   24.73    0.54 
   4   1   5    0.33    0.08 
   4   1   5    0.31    0.12 
   4   1   5    0.20    0.10 
   4   1   5    0.18    0.10 
   4   1   5    0.19    0.11 
  -4  -1  -5    0.39    0.13 
  -4  -1  -5    0.28    0.11 
   5   0   6    7.92    0.34 
   5   0   6    8.24    0.45 
   5   0   6    7.09    0.41 
  -5   0  -6    8.18    0.43 
   6  -1   7    6.35    0.43 
  -6   1  -7    5.12    0.40 
   7  -2   8    0.12    0.17 
  -7   2  -8    0.01    0.19 
  -3   8  -1    1.17    0.27 
   3  -8   1    1.23    0.25 
  -2   7   0   58.00    1.47 
  -2   7   0   59.84    1.51 
   2  -7   0   60.96    1.52 
  -1   6   1    0.23    0.13 
  -1   6   1    0.43    0.14 
   1  -6  -1    0.42    0.15 
   1  -6  -1    0.30    0.13 
   0   5   2    5.15    0.28 
   0   5   2    4.69    0.25 
   0   5   2    5.17    0.28 
   0  -5  -2    4.93    0.27 
   0  -5  -2    5.08    0.28 
   0  -5  -2    5.15    0.27 
   1   4   3   21.21    0.56 
   1   4   3   21.84    0.59 
   1   4   3   20.84    0.57 
  -1  -4  -3   21.46    0.58 
  -1  -4  -3   21.08    0.56 
  -1  -4  -3   20.77    0.56 
   2   3   4   58.17    1.23 
   2   3   4   55.31    1.22 
   2   3   4   57.21    1.23 
  -2  -3  -4   57.20    1.23 
  -2  -3  -4   58.88    1.22 
  -2  -3  -4   58.42    1.22 
  -2  -3  -4   57.63    1.22 
   3   2   5    1.85    0.19 
   3   2   5    1.47    0.17 
   3   2   5    1.49    0.17 
   3   2   5    1.29    0.16 
  -3  -2  -5    1.09    0.13 
  -3  -2  -5    1.28    0.16 
  -3  -2  -5    1.26    0.08 
  -3  -2  -5    1.42    0.16 
   4   1   6    0.10    0.09 
   4   1   6   -0.01    0.12 
   4   1   6    0.17    0.10 
   4   1   6    0.07    0.10 
  -4  -1  -6    0.11    0.10 
   5   0   7   34.16    1.00 
   5   0   7   33.00    1.01 
   5   0   7   33.15    0.82 
  -5   0  -7   34.41    0.98 
   6  -1   8    0.01    0.15 
   6  -1   8    0.11    0.14 
  -6   1  -8   -0.11    0.14 
   7  -2   9    0.00    0.15 
  -4   9  -1    1.37    0.34 
   4  -9   1    1.54    0.32 
  -3   8   0    0.03    0.19 
   3  -8   0    0.14    0.15 
  -2   7   1   18.61    0.72 
  -2   7   1   18.79    0.71 
   2  -7  -1   17.25    0.69 
  -1   6   2    5.30    0.34 
  -1   6   2    5.17    0.32 
   1  -6  -2    4.38    0.30 
   0   5   3   66.01    1.46 
   0   5   3   64.78    1.43 
   0   5   3   65.45    1.46 
   0  -5  -3   66.86    1.45 
   0  -5  -3   66.60    1.45 
   0  -5  -3   66.06    1.45 
   1   4   4   -0.13    0.05 
   1   4   4    0.04    0.07 
   1   4   4    0.03    0.07 
  -1  -4  -4   -0.02    0.06 
  -1  -4  -4   -0.06    0.07 
  -1  -4  -4    0.03    0.07 
  -1  -4  -4   -0.10    0.05 
   2   3   5   16.93    0.51 
   2   3   5   18.18    0.52 
   2   3   5   17.33    0.51 
  -2  -3  -5   17.01    0.49 
  -2  -3  -5   16.77    0.49 
  -2  -3  -5   16.42    0.50 
  -2  -3  -5   16.82    0.49 
   3   2   6    4.87    0.27 
   3   2   6    4.51    0.26 
   3   2   6    4.66    0.27 
  -3  -2  -6    5.02    0.27 
   4   1   7    5.96    0.35 
   4   1   7    5.45    0.37 
   4   1   7    8.94    0.59 
   4   1   7    6.47    0.37 
  -4  -1  -7    5.76    0.33 
   5   0   8    2.11    0.27 
   5   0   8    2.47    0.31 
  -5   0  -8    2.05    0.26 
   6  -1   9    0.01    0.18 
   6  -1   9   -0.16    0.11 
  -6   1  -9   -0.04    0.15 
  -4   9   0    0.09    0.24 
   4  -9   0    0.00    0.20 
  -3   8   1    3.32    0.40 
  -3   8   1    3.77    0.40 
   3  -8  -1    2.98    0.36 
  -2   7   2   55.09    1.43 
  -2   7   2   54.42    1.41 
   2  -7  -2   51.88    1.38 
  -1   6   3    0.50    0.15 
  -1   6   3    0.66    0.16 
   1  -6  -3    0.45    0.13 
   0   5   4   64.96    1.47 
   0   5   4   64.51    1.48 
   0   5   4   68.96    1.47 
   0  -5  -4   67.33    1.47 
   0  -5  -4   66.40    1.46 
   1   4   5    1.57    0.18 
   1   4   5    1.55    0.16 
   1   4   5    1.35    0.16 
  -1  -4  -5    1.50    0.16 
  -1  -4  -5    1.43    0.15 
  -1  -4  -5    1.56    0.17 
  -1  -4  -5    1.41    0.15 
   2   3   6   14.86    0.48 
   2   3   6   15.92    0.50 
   2   3   6   14.32    0.48 
  -2  -3  -6   14.25    0.31 
  -2  -3  -6   15.08    0.53 
  -2  -3  -6   14.47    0.47 
  -2  -3  -6   15.45    0.47 
   3   2   7    0.24    0.11 
   3   2   7    0.12    0.10 
   3   2   7    0.06    0.09 
   3   2   7    0.01    0.10 
  -3  -2  -7    0.00    0.08 
   4   1   8    0.07    0.12 
   4   1   8   -0.03    0.12 
   4   1   8    0.07    0.15 
  -4  -1  -8    0.04    0.10 
   5   0   9    1.69    0.28 
   5   0   9    1.05    0.21 
  -5   0  -9    1.31    0.22 
   6  -1  10    0.32    0.22 
   6  -1  10    0.36    0.18 
  -4   9   1   -0.09    0.22 
   4  -9  -1    0.01    0.18 
  -3   8   2    9.93    0.57 
  -3   8   2   10.58    0.61 
   3  -8  -2    9.25    0.55 
  -2   7   3   34.96    1.06 
  -2   7   3   34.88    1.07 
   2  -7  -3   35.74    1.05 
  -1   6   4    0.37    0.15 
  -1   6   4    0.24    0.14 
   1  -6  -4    0.10    0.12 
   0   5   5   53.86    1.22 
   0   5   5   52.28    1.25 
   0   5   5   50.86    1.23 
   0  -5  -5   50.56    1.20 
   1   4   6    6.58    0.32 
   1   4   6    6.35    0.32 
   1   4   6    6.68    0.30 
  -1  -4  -6    6.55    0.30 
  -1  -4  -6    6.13    0.30 
   2   3   7   10.13    0.40 
   2   3   7    9.31    0.39 
   2   3   7    9.54    0.39 
  -2  -3  -7    9.96    0.38 
  -2  -3  -7    9.45    0.36 
   3   2   8    0.95    0.17 
   3   2   8    0.93    0.20 
   3   2   8    0.86    0.16 
   3   2   8    0.87    0.16 
  -3  -2  -8    1.07    0.16 
   4   1   9    0.11    0.15 
   4   1   9    0.17    0.13 
   4   1   9    0.17    0.14 
  -4  -1  -9   -0.04    0.10 
   5   0  10    0.88    0.20 
   5   0  10    0.28    0.24 
   5   0  10    0.32    0.19 
  -5   0 -10    0.64    0.18 
   6  -1  11   -0.27    0.13 
   6  -1  11    0.01    0.19 
  -4   9   2    0.05    0.23 
   4  -9  -2   -0.22    0.15 
  -3   8   3    0.93    0.25 
  -3   8   3    0.90    0.24 
   3  -8  -3    0.95    0.24 
  -2   7   4    4.30    0.40 
  -2   7   4    4.29    0.40 
   2  -7  -4    4.25    0.35 
  -1   6   5    0.27    0.15 
  -1   6   5    0.22    0.15 
  -1   6   5    0.16    0.13 
   1  -6  -5    0.31    0.13 
   0   5   6   28.23    0.82 
   0   5   6   27.38    0.80 
   0   5   6   29.22    0.80 
   0  -5  -6   28.04    0.78 
   0  -5  -6   29.06    0.80 
   1   4   7   41.88    1.05 
   1   4   7   41.83    1.05 
  -1  -4  -7   44.41    1.01 
  -1  -4  -7   42.99    0.91 
  -1  -4  -7   41.50    1.02 
   2   3   8   14.89    0.53 
   2   3   8   15.27    0.53 
   2   3   8   14.87    0.53 
  -2  -3  -8   15.13    0.50 
  -2  -3  -8   14.32    0.48 
   3   2   9    0.64    0.16 
   3   2   9    0.79    0.20 
   3   2   9    1.27    0.20 
   3   2   9    0.74    0.16 
  -3  -2  -9    0.90    0.15 
  -3  -2  -9    0.97    0.15 
   4   1  10    7.38    0.45 
   4   1  10    7.04    0.43 
   4   1  10    7.72    0.50 
  -4  -1 -10    7.39    0.38 
   5   0  11    1.21    0.31 
   5   0  11    1.36    0.28 
   5   0  11    0.97    0.23 
  -4   9   3   -0.38    0.20 
  -4   9   3   -0.57    0.19 
   4  -9  -3   -0.21    0.17 
  -3   8   4    0.00    0.18 
  -3   8   4    0.08    0.20 
   3  -8  -4    0.27    0.17 
  -2   7   5   12.24    0.59 
  -2   7   5   11.12    0.57 
   2  -7  -5   10.88    0.53 
  -1   6   6    8.34    0.43 
  -1   6   6    8.81    0.47 
  -1   6   6    8.75    0.45 
   1  -6  -6    8.40    0.42 
   0   5   7    0.30    0.14 
   0   5   7    0.41    0.12 
   0   5   7    0.34    0.14 
   0  -5  -7    0.19    0.11 
   0  -5  -7    0.16    0.12 
   1   4   8    8.79    0.40 
   1   4   8    8.36    0.40 
  -1  -4  -8    8.63    0.37 
  -1  -4  -8    8.81    0.37 
  -1  -4  -8    8.86    0.29 
   2   3   9    0.59    0.15 
   2   3   9    0.41    0.16 
   2   3   9    0.26    0.13 
   2   3   9    0.35    0.13 
  -2  -3  -9    0.38    0.12 
   3   2  10    0.36    0.14 
   3   2  10    0.28    0.18 
   3   2  10    0.32    0.15 
   3   2  10    0.42    0.14 
  -3  -2 -10    0.30    0.11 
  -3  -2 -10    0.36    0.11 
   4   1  11    3.44    0.35 
   4   1  11    3.70    0.42 
   4   1  11    3.80    0.39 
   5   0  12    4.28    0.52 
   5   0  12    4.40    0.44 
   5   0  12    4.58    0.45 
  -4   9   4    0.10    0.23 
  -4   9   4   -0.13    0.20 
   4  -9  -4    0.07    0.22 
  -3   8   5    1.78    0.32 
  -3   8   5    1.96    0.33 
   3  -8  -5    1.76    0.29 
  -2   7   6    0.23    0.18 
  -2   7   6    0.04    0.14 
   2  -7  -6    0.18    0.14 
  -1   6   7    7.20    0.40 
  -1   6   7    6.79    0.43 
  -1   6   7    7.56    0.45 
   1  -6  -7    7.29    0.40 
   0   5   8   38.23    1.05 
   0   5   8   38.50    1.01 
   0   5   8   37.43    1.04 
   0  -5  -8   37.76    0.99 
   0  -5  -8   39.65    0.99 
   1   4   9    1.53    0.21 
   1   4   9    1.03    0.19 
  -1  -4  -9    1.85    0.13 
  -1  -4  -9    1.91    0.21 
   2   3  10   -0.04    0.10 
   2   3  10   -0.10    0.10 
   2   3  10    0.12    0.15 
   2   3  10    0.00    0.11 
  -2  -3 -10    0.07    0.09 
  -2  -3 -10   -0.05    0.08 
   3   2  11   16.42    0.65 
   3   2  11   15.12    0.62 
   3   2  11   15.50    0.69 
  -3  -2 -11   15.10    0.56 
   4   1  12    0.04    0.13 
   4   1  12   -0.15    0.15 
   4   1  12    0.01    0.18 
  -4   9   5    0.76    0.27 
  -4   9   5    0.51    0.26 
  -3   8   6    5.07    0.49 
  -3   8   6    5.58    0.52 
   3  -8  -6    5.42    0.43 
  -2   7   7    0.01    0.17 
  -2   7   7    0.20    0.17 
   2  -7  -7    0.06    0.13 
  -1   6   8   -0.12    0.13 
  -1   6   8    0.22    0.16 
  -1   6   8    0.04    0.12 
   1  -6  -8   -0.13    0.09 
   1  -6  -8   -0.14    0.12 
   0   5   9   21.14    0.71 
   0   5   9   23.37    0.77 
   0   5   9   22.41    0.76 
   0  -5  -9   22.20    0.68 
   0  -5  -9   22.75    0.69 
   1   4  10    4.96    0.35 
   1   4  10    4.57    0.33 
  -1  -4 -10    4.78    0.28 
  -1  -4 -10    4.68    0.28 
   2   3  11    4.89    0.36 
   2   3  11    4.60    0.43 
   2   3  11    4.37    0.33 
  -2  -3 -11    4.97    0.27 
  -2  -3 -11    4.87    0.32 
   3   2  12    5.23    0.50 
   3   2  12    5.01    0.38 
   3   2  12    5.15    0.40 
   4   1  13    0.44    0.25 
   4   1  13    0.36    0.20 
   4   1  13    0.24    0.17 
  -3   8   7    0.04    0.19 
  -3   8   7   -0.38    0.17 
  -2   7   8    0.30    0.19 
  -2   7   8    0.25    0.17 
   2  -7  -8    0.30    0.17 
  -1   6   9    0.53    0.18 
  -1   6   9    0.22    0.17 
   1  -6  -9    0.49    0.15 
   1  -6  -9    0.44    0.15 
   0   5  10   16.69    0.65 
   0   5  10   15.68    0.63 
   0  -5 -10   11.70    0.48 
   0  -5 -10   15.46    0.53 
   1   4  11    2.21    0.27 
   1   4  11    1.80    0.25 
  -1  -4 -11    2.27    0.22 
   2   3  12    0.15    0.15 
   2   3  12    0.12    0.20 
   2   3  12   -0.05    0.12 
   3   2  13    0.99    0.27 
   3   2  13    1.01    0.25 
   3   2  13    0.94    0.22 
  -3   8   8    1.38    0.32 
  -3   8   8    0.58    0.25 
  -2   7   9   -0.26    0.12 
  -2   7   9   -0.01    0.18 
   2  -7  -9    0.06    0.17 
  -1   6  10   -0.15    0.12 
  -1   6  10   -0.11    0.13 
   1  -6 -10   -0.03    0.12 
   0   5  11    0.10    0.14 
   0   5  11    0.15    0.14 
   1   4  12    0.90    0.20 
   1   4  12    0.47    0.17 
   2   3  13    0.81    0.21 
   2   3  13    0.39    0.23 
   2   3  13    0.69    0.21 
   3   2  14    2.30    0.31 
   3   2  14    2.77    0.37 
   3   2  14    2.68    0.43 
  -3   8   9    0.99    0.27 
  -3   8   9    1.33    0.34 
  -2   7  10   -0.12    0.15 
  -2   7  10    0.22    0.19 
  -1   6  11    1.28    0.25 
  -1   6  11    1.10    0.24 
   0   5  12    0.23    0.16 
   0   5  12    0.43    0.17 
   1   4  13    0.27    0.18 
   1   4  13    0.53    0.19 
   2   3  14    0.10    0.15 
   2   3  14    0.31    0.21 
   2   3  14    0.11    0.17 
  -2   7  11    0.25    0.21 
  -2   7  11    0.16    0.18 
  -1   6  12    2.08    0.32 
  -1   6  12    2.03    0.32 
   0   5  13    0.05    0.15 
   0   5  13   -0.08    0.14 
   1   4  14    0.09    0.17 
   1   4  14    0.69    0.27 
   1   4  14    0.32    0.19 
  -2   7  12    0.34    0.22 
  -2   7  12   -0.15    0.18 
  -1   6  13    0.21    0.20 
  -1   6  13    0.36    0.22 
   0   5  14    1.05    0.26 
   0   5  14    1.42    0.28 
  -5  -1  11    0.15    0.11 
  -5  -1  11    0.07    0.10 
  -5  -1  11    0.50    0.22 
  -6   0  10   -0.14    0.11 
  -6   0  10   -0.07    0.13 
  -6   0  10   -0.18    0.18 
  -4  -2  11    0.48    0.20 
  -4  -2  11    0.79    0.10 
  -4  -2  11    0.60    0.11 
  -5  -1  10    0.07    0.16 
  -5  -1  10    0.19    0.12 
  -5  -1  10    0.17    0.11 
  -6   0   9    0.06    0.19 
  -6   0   9   -0.12    0.11 
  -6   0   9    0.07    0.15 
  -7   1   8    0.23    0.17 
  -7   1   8   -0.04    0.24 
  -3  -3  11    1.87    0.28 
  -3  -3  11    1.66    0.30 
  -4  -2  10    2.15    0.15 
  -4  -2  10    2.33    0.30 
  -4  -2  10    2.07    0.15 
  -5  -1   9    0.05    0.09 
  -5  -1   9   -0.30    0.12 
  -5  -1   9   -0.05    0.10 
  -6   0   8    0.40    0.19 
  -6   0   8    0.01    0.11 
  -6   0   8    0.27    0.15 
  -7   1   7    0.36    0.17 
  -7   1   7    0.30    0.23 
  -2  -4  11    0.03    0.15 
  -2  -4  11    0.03    0.06 
  -3  -3  10    0.19    0.15 
  -3  -3  10    0.20    0.15 
  -4  -2   9    2.92    0.34 
  -4  -2   9    2.27    0.14 
  -4  -2   9    2.52    0.15 
  -4  -2   9    2.29    0.15 
  -5  -1   8    2.40    0.22 
  -5  -1   8    2.79    0.23 
  -5  -1   8    2.64    0.33 
  -6   0   7    0.29    0.21 
  -6   0   7    0.39    0.15 
  -7   1   6    0.50    0.25 
  -7   1   6    1.07    0.23 
  -8   2   5    1.50    0.30 
  -1  -5  11    0.90    0.15 
  -1  -5  11    1.31    0.29 
  -2  -4  10    0.13    0.06 
  -2  -4  10    0.27    0.17 
  -3  -3   9    1.71    0.25 
  -3  -3   9    1.58    0.25 
  -4  -2   8    7.88    0.46 
  -4  -2   8    8.19    0.26 
  -4  -2   8    8.45    0.27 
  -4  -2   8    8.55    0.27 
  -5  -1   7    0.02    0.07 
  -5  -1   7   -0.20    0.09 
  -5  -1   7    0.25    0.10 
  -5  -1   7    0.25    0.18 
  -6   0   6    1.54    0.21 
  -6   0   6    1.59    0.28 
  -7   1   5    0.10    0.16 
  -7   1   5    0.19    0.21 
  -8   2   4    0.40    0.21 
  -1  -5  10    1.84    0.31 
  -1  -5  10    1.97    0.20 
  -2  -4   9    0.27    0.08 
  -2  -4   9    0.33    0.07 
  -2  -4   9    0.19    0.15 
  -3  -3   8    2.39    0.29 
  -4  -2   7    0.81    0.20 
  -4  -2   7    1.20    0.11 
  -4  -2   7    1.08    0.11 
  -4  -2   7    1.05    0.10 
  -5  -1   6    1.35    0.25 
  -5  -1   6    1.11    0.15 
  -5  -1   6    1.24    0.15 
  -5  -1   6    1.25    0.16 
   6   0  -5    0.11    0.11 
  -6   0   5    0.07    0.12 
  -6   0   5    0.18    0.19 
  -7   1   4    3.07    0.41 
  -7   1   4    2.55    0.32 
  -8   2   3    0.36    0.22 
   0  -6  10    1.39    0.21 
  -1  -5   9    0.49    0.12 
  -1  -5   9    0.37    0.17 
  -2  -4   8    2.32    0.14 
  -2  -4   8    2.36    0.14 
  -2  -4   8    2.27    0.27 
  -2  -4   8    2.32    0.13 
  -3  -3   7    0.70    0.18 
  -4  -2   6    0.04    0.12 
  -4  -2   6    0.10    0.07 
  -4  -2   6    0.08    0.05 
  -4  -2   6    0.14    0.06 
  -5  -1   5    1.83    0.17 
  -5  -1   5    2.01    0.19 
  -5  -1   5    1.80    0.27 
   6   0  -4    0.27    0.09 
  -6   0   4    0.26    0.11 
  -6   0   4    0.31    0.14 
  -6   0   4   -0.04    0.16 
  -7   1   3    0.96    0.22 
  -7   1   3    0.70    0.24 
  -8   2   2    0.38    0.21 
   0  -6   9    0.54    0.15 
  -1  -5   8    9.25    0.48 
  -1  -5   8    9.62    0.36 
  -1  -5   8    8.97    0.38 
  -2  -4   7    0.54    0.08 
  -2  -4   7    0.53    0.08 
  -2  -4   7    0.84    0.17 
  -2  -4   7    0.57    0.08 
  -3  -3   6    4.78    0.35 
  -4  -2   5    1.11    0.19 
  -4  -2   5    1.35    0.12 
  -4  -2   5    1.18    0.10 
   5   1  -4    2.72    0.11 
   5   1  -4    2.90    0.14 
  -5  -1   4    3.10    0.22 
  -5  -1   4    2.75    0.20 
  -5  -1   4    2.56    0.29 
   6   0  -3    0.33    0.11 
  -6   0   3    0.20    0.12 
  -6   0   3    0.15    0.12 
  -6   0   3    0.04    0.17 
  -6   0   3    0.31    0.14 
   7  -1  -2    1.24    0.20 
  -7   1   2    1.37    0.25 
  -7   1   2    1.80    0.32 
  -8   2   1    1.00    0.26 
   1  -7   9    0.12    0.14 
   0  -6   8    5.01    0.32 
  -1  -5   7    1.48    0.16 
  -1  -5   7    1.29    0.17 
  -1  -5   7    1.62    0.23 
  -1  -5   7    1.53    0.16 
  -2  -4   6    0.38    0.06 
  -2  -4   6    0.39    0.07 
  -2  -4   6    0.36    0.07 
  -2  -4   6    0.22    0.11 
  -3  -3   5   12.42    0.55 
  -4  -2   4   23.02    0.55 
  -4  -2   4   23.62    0.55 
  -4  -2   4   23.07    0.72 
   5   1  -3    3.82    0.19 
  -5  -1   3    3.73    0.24 
  -5  -1   3    3.79    0.25 
  -5  -1   3    4.47    0.24 
  -5  -1   3    3.93    0.32 
   6   0  -2   11.42    0.45 
  -6   0   2   11.19    0.55 
  -6   0   2   11.43    0.50 
  -6   0   2   11.94    0.50 
  -6   0   2   11.75    0.48 
   7  -1  -1   -0.14    0.11 
  -7   1   1    0.01    0.19 
  -7   1   1    0.05    0.14 
  -8   2   0    0.11    0.19 
   1  -7   8    0.92    0.20 
   0  -6   7   -0.12    0.09 
  -1  -5   6    0.66    0.11 
  -1  -5   6    0.94    0.18 
  -1  -5   6    0.78    0.12 
  -1  -5   6    0.81    0.13 
  -2  -4   5    8.92    0.26 
  -2  -4   5    9.32    0.36 
  -2  -4   5    8.56    0.25 
  -2  -4   5    8.89    0.25 
  -3  -3   4    3.30    0.11 
  -3  -3   4    3.28    0.11 
  -3  -3   4    3.25    0.11 
  -4  -2   3    4.63    0.20 
  -4  -2   3    4.57    0.20 
  -4  -2   3    4.75    0.20 
  -4  -2   3    4.62    0.29 
   5   1  -2    3.39    0.20 
  -5  -1   2    3.98    0.23 
  -5  -1   2    3.52    0.24 
  -5  -1   2    3.69    0.30 
  -5  -1   2    4.16    0.25 
   6   0  -1    7.72    0.38 
  -6   0   1    8.41    0.41 
  -6   0   1    8.49    0.47 
  -6   0   1    8.52    0.43 
   7  -1   0    0.22    0.14 
  -7   1   0    0.37    0.17 
   8  -2   1    1.06    0.23 
  -8   2  -1    1.27    0.30 
   1  -7   7    0.03    0.13 
   0  -6   6   -0.02    0.10 
  -1  -5   5    1.91    0.21 
  -1  -5   5    1.77    0.17 
  -1  -5   5    1.50    0.15 
  -1  -5   5    1.79    0.17 
  -2  -4   4    0.20    0.06 
  -2  -4   4    0.29    0.06 
  -2  -4   4    0.27    0.06 
  -2  -4   4    0.10    0.07 
  -3  -3   3    2.94    0.12 
  -3  -3   3    3.11    0.13 
  -3  -3   3    2.94    0.12 
   4   2  -2   31.73    0.64 
   4   2  -2   31.15    0.66 
   4   2  -2   31.59    0.66 
  -4  -2   2   30.50    0.71 
  -4  -2   2   31.21    0.72 
  -4  -2   2   31.70    0.84 
  -4  -2   2   30.77    0.71 
   5   1  -1    0.72    0.12 
  -5  -1   1    0.86    0.15 
  -5  -1   1    0.80    0.14 
  -5  -1   1    0.68    0.12 
  -5  -1   1    0.77    0.17 
   6   0   0    0.44    0.14 
  -6   0   0    0.82    0.17 
  -6   0   0    0.84    0.21 
  -6   0   0    0.63    0.16 
   7  -1   1    1.70    0.25 
  -7   1  -1    2.18    0.31 
   8  -2   2    0.78    0.21 
  -8   2  -2    0.77    0.24 
   2  -8   7    0.31    0.17 
   1  -7   6    0.02    0.13 
   0   6  -5    0.40    0.08 
   0  -6   5    0.26    0.12 
   0  -6   5    0.05    0.11 
   0  -6   5    0.43    0.13 
  -1  -5   4    0.95    0.12 
  -1  -5   4    1.00    0.13 
  -1  -5   4    0.96    0.13 
  -2  -4   3    2.98    0.15 
  -2  -4   3    2.67    0.16 
  -2  -4   3    2.85    0.14 
  -2  -4   3    2.86    0.14 
  -3  -3   2    6.91    0.22 
  -3  -3   2    6.84    0.21 
  -3  -3   2    7.12    0.22 
   4   2  -1   11.04    0.32 
   4   2  -1   10.86    0.32 
   4   2  -1   10.72    0.32 
  -4  -2   1   10.56    0.35 
  -4  -2   1   10.92    0.35 
  -4  -2   1   10.64    0.41 
  -4  -2   1   11.12    0.35 
   5   1   0    0.36    0.10 
  -5  -1   0    0.23    0.09 
  -5  -1   0    0.29    0.09 
  -5  -1   0    0.28    0.12 
  -5  -1   0    0.44    0.12 
   6   0   1   -0.05    0.10 
  -6   0  -1   -0.08    0.12 
  -6   0  -1   -0.10    0.13 
  -6   0  -1    0.04    0.11 
   7  -1   2   -0.05    0.11 
  -7   1  -2    0.06    0.16 
   8  -2   3    0.38    0.19 
  -8   2  -3    0.20    0.21 
   2  -8   6    0.04    0.15 
   1  -7   5    4.02    0.33 
   0   6  -4   14.04    0.43 
   0  -6   4   14.83    0.53 
   0  -6   4   14.48    0.52 
   0  -6   4   14.76    0.53 
   1   5  -3    2.42    0.12 
   1   5  -3    2.33    0.17 
   1   5  -3    2.35    0.12 
  -1  -5   3    2.46    0.17 
  -1  -5   3    2.29    0.17 
  -1  -5   3    2.27    0.17 
  -2  -4   2   92.70    1.76 
  -2  -4   2   91.18    1.75 
  -2  -4   2   92.59    1.76 
  -2  -4   2   93.40    1.77 
   3   3  -1   10.50    0.26 
  -3  -3   1   10.01    0.29 
  -3  -3   1    9.94    0.29 
  -3  -3   1   10.51    0.30 
   4   2   0   20.14    0.51 
   4   2   0   16.00    0.48 
  -4  -2   0   19.33    0.53 
  -4  -2   0   19.84    0.57 
  -4  -2   0   19.85    0.53 
  -4  -2   0   20.40    0.52 
   5   1   1   30.38    0.80 
  -5  -1  -1   31.26    0.84 
  -5  -1  -1   30.21    0.81 
  -5  -1  -1   30.82    0.82 
  -5  -1  -1   31.23    0.83 
   6   0   2    6.00    0.37 
  -6   0  -2    5.98    0.39 
  -6   0  -2    6.60    0.39 
   7  -1   3    3.65    0.37 
  -7   1  -3    3.08    0.36 
   8  -2   4    0.04    0.16 
  -8   2  -4    0.48    0.22 
   2  -8   5    1.28    0.25 
  -1   7  -4   10.50    0.44 
   1  -7   4   11.05    0.52 
   0   6  -3    0.12    0.10 
   0   6  -3    0.03    0.08 
   0  -6   3   -0.14    0.07 
   0  -6   3   -0.06    0.09 
   0  -6   3    0.02    0.09 
   1   5  -2    0.12    0.06 
   1   5  -2    0.04    0.06 
   1   5  -2    0.15    0.07 
  -1  -5   2    0.03    0.06 
  -1  -5   2    0.10    0.07 
  -1  -5   2    0.12    0.07 
   2   4  -1   22.91    0.51 
  -2  -4   1   23.59    0.54 
  -2  -4   1   23.44    0.55 
  -2  -4   1   22.16    0.54 
   3   3   0   45.02    0.93 
   3   3   0   46.33    0.94 
  -3  -3   0   45.81    0.96 
  -3  -3   0   46.06    0.96 
  -3  -3   0   45.57    0.96 
   4   2   1  122.33    2.37 
   4   2   1  123.88    2.37 
   4   2   1  122.34    2.38 
  -4  -2  -1  122.24    2.38 
  -4  -2  -1  119.88    2.39 
  -4  -2  -1  121.41    2.40 
  -4  -2  -1  123.64    2.39 
   5   1   2  165.17    3.25 
   5   1   2  166.09    3.27 
  -5  -1  -2  165.68    3.26 
  -5  -1  -2  169.66    3.26 
  -5  -1  -2  162.22    3.26 
  -5  -1  -2  168.85    3.25 
   6   0   3    0.23    0.13 
  -6   0  -3    0.24    0.16 
   7  -1   4    2.05    0.29 
  -7   1  -4    1.78    0.29 
   8  -2   5    0.56    0.20 
  -8   2  -5    0.34    0.24 
   2  -8   4    0.08    0.16 
  -1   7  -3    1.12    0.19 
   1  -7   3    1.21    0.20 
   1  -7   3    0.95    0.20 
   0   6  -2   13.83    0.48 
   0   6  -2   15.15    0.49 
   0  -6   2   15.10    0.53 
   0  -6   2   14.55    0.52 
   0  -6   2   14.37    0.51 
   1   5  -1    1.61    0.17 
   1   5  -1    1.67    0.14 
   1   5  -1    1.51    0.12 
  -1  -5   1    1.43    0.15 
  -1  -5   1    1.51    0.15 
  -1  -5   1    1.57    0.16 
   2   4   0    3.26    0.16 
   2   4   0    3.05    0.09 
  -2  -4   0    3.41    0.18 
  -2  -4   0    2.92    0.16 
  -2  -4   0    2.97    0.17 
   3   3   1  160.47    2.98 
   3   3   1  156.69    2.98 
   3   3   1  163.71    2.99 
  -3  -3  -1  161.36    2.99 
  -3  -3  -1  156.07    2.98 
  -3  -3  -1  159.05    2.87 
  -3  -3  -1  159.37    3.00 
   4   2   2  130.29    2.52 
   4   2   2  129.75    2.53 
   4   2   2  130.06    2.52 
  -4  -2  -2  128.56    2.52 
  -4  -2  -2  129.84    2.53 
  -4  -2  -2  130.68    2.46 
  -4  -2  -2  126.86    2.50 
  -4  -2  -2  127.72    2.53 
   5   1   3    1.10    0.17 
   5   1   3    1.04    0.17 
  -5  -1  -3    0.91    0.16 
  -5  -1  -3    0.89    0.16 
  -5  -1  -3    0.87    0.16 
  -5  -1  -3    1.24    0.18 
   6   0   4   10.09    0.48 
  -6   0  -4    9.60    0.50 
   7  -1   5    0.34    0.15 
  -7   1  -5    0.22    0.18 
   8  -2   6    0.17    0.18 
  -8   2  -6    0.04    0.20 
  -2   8  -3    6.13    0.43 
   2  -8   3    5.86    0.43 
  -1   7  -2   57.76    1.37 
   1  -7   2   55.13    1.40 
   1  -7   2   55.08    1.40 
   0   6  -1   17.06    0.54 
   0   6  -1   16.95    0.53 
   0   6  -1   16.76    0.54 
   0  -6   1   17.31    0.57 
   0  -6   1   15.86    0.55 
   0  -6   1   16.83    0.56 
   1   5   0    6.12    0.26 
   1   5   0    6.31    0.27 
   1   5   0    6.42    0.26 
  -1  -5   0    6.78    0.29 
  -1  -5   0    6.47    0.28 
  -1  -5   0    5.72    0.27 
   2   4   1   21.12    0.53 
   2   4   1   21.13    0.54 
  -2  -4  -1   21.01    0.54 
  -2  -4  -1   21.07    0.54 
  -2  -4  -1   21.17    0.54 
   3   3   2   59.85    1.27 
   3   3   2   66.04    1.28 
   3   3   2   60.02    1.17 
   3   3   2   61.15    1.27 
  -3  -3  -2   59.43    1.17 
  -3  -3  -2   61.35    1.27 
  -3  -3  -2   59.45    1.27 
   4   2   3    9.28    0.36 
   4   2   3    9.23    0.37 
   4   2   3    9.56    0.37 
  -4  -2  -3    9.34    0.36 
  -4  -2  -3    9.58    0.36 
  -4  -2  -3    9.28    0.37 
  -4  -2  -3    9.69    0.33 
  -4  -2  -3    8.60    0.32 
   5   1   4    0.02    0.11 
   5   1   4    0.05    0.09 
   5   1   4   -0.06    0.08 
  -5  -1  -4    0.03    0.10 
  -5  -1  -4   -0.11    0.09 
   6   0   5    0.11    0.17 
   6   0   5    0.09    0.14 
  -6   0  -5   -0.03    0.14 
   7  -1   6    0.44    0.17 
  -7   1  -6    0.40    0.20 
   8  -2   7    0.17    0.22 
  -8   2  -7   -0.06    0.20 
   3  -9   3   -0.07    0.16 
  -2   8  -2    0.27    0.17 
   2  -8   2    0.42    0.18 
  -1   7  -1   19.43    0.66 
  -1   7  -1   18.85    0.67 
   1  -7   1   19.26    0.69 
   1  -7   1   20.26    0.71 
   0   6   0   23.79    0.69 
   0   6   0   25.23    0.70 
   0  -6   0   23.84    0.71 
   0  -6   0   23.21    0.70 
   0  -6   0   23.28    0.70 
   1   5   1   41.52    0.95 
   1   5   1   39.89    0.95 
   1   5   1   42.91    0.94 
  -1  -5  -1   41.49    0.97 
  -1  -5  -1   41.19    0.96 
  -1  -5  -1   40.83    0.96 
   2   4   2    6.90    0.28 
   2   4   2    6.69    0.28 
  -2  -4  -2    7.69    0.28 
  -2  -4  -2    6.99    0.28 
  -2  -4  -2    7.26    0.29 
  -2  -4  -2    7.65    0.29 
   3   3   3    7.63    0.30 
   3   3   3    7.90    0.31 
   3   3   3    8.19    0.31 
   3   3   3    8.06    0.26 
  -3  -3  -3    7.99    0.31 
  -3  -3  -3    8.24    0.31 
  -3  -3  -3    8.33    0.32 
   4   2   4   33.65    0.88 
   4   2   4   35.62    0.89 
   4   2   4   34.96    0.88 
  -4  -2  -4   35.01    0.89 
  -4  -2  -4   35.88    0.88 
  -4  -2  -4   34.77    0.88 
  -4  -2  -4   34.71    0.84 
  -4  -2  -4   34.72    0.79 
   5   1   5    0.41    0.14 
   5   1   5    0.33    0.13 
   5   1   5    0.43    0.11 
  -5  -1  -5    0.51    0.15 
   6   0   6    3.10    0.32 
   6   0   6    4.09    0.41 
  -6   0  -6    3.45    0.33 
   7  -1   7    0.34    0.18 
  -7   1  -7    0.16    0.17 
   3  -9   2   -0.07    0.16 
  -2   8  -1    0.65    0.19 
   2  -8   1    0.72    0.20 
  -1   7   0   11.77    0.52 
  -1   7   0   11.10    0.50 
   1  -7   0   11.16    0.51 
   1  -7   0   10.87    0.52 
   0   6   1    7.89    0.37 
   0   6   1    7.86    0.37 
   0  -6  -1    7.82    0.37 
   0  -6  -1    8.04    0.37 
   0  -6  -1    8.28    0.38 
   1   5   2  258.63    4.70 
   1   5   2  254.40    4.72 
   1   5   2  254.06    4.72 
  -1  -5  -2  253.85    4.72 
  -1  -5  -2  250.57    4.71 
  -1  -5  -2  246.29    4.71 
   2   4   3   90.15    1.85 
   2   4   3   92.65    1.86 
  -2  -4  -3   91.90    1.86 
  -2  -4  -3   93.64    1.86 
  -2  -4  -3   92.17    1.85 
  -2  -4  -3   94.89    1.85 
   3   3   4   46.79    1.00 
   3   3   4   46.43    1.06 
   3   3   4   47.13    1.07 
   3   3   4   46.44    1.06 
  -3  -3  -4   46.69    1.07 
  -3  -3  -4   45.40    1.05 
  -3  -3  -4   48.60    1.06 
   4   2   5    0.07    0.08 
   4   2   5    0.02    0.08 
   4   2   5    0.01    0.09 
   4   2   5    0.10    0.09 
  -4  -2  -5    0.05    0.10 
  -4  -2  -5    0.23    0.11 
  -4  -2  -5   -0.03    0.07 
  -4  -2  -5    0.15    0.06 
   5   1   6    0.26    0.13 
   5   1   6    0.17    0.14 
  -5  -1  -6    0.15    0.13 
   6   0   7    1.47    0.28 
   6   0   7    1.27    0.24 
  -6   0  -7    1.28    0.23 
   7  -1   8    0.13    0.16 
  -7   1  -8    0.10    0.18 
  -3   9  -1   -0.02    0.19 
   3  -9   1    0.28    0.18 
  -2   8   0    1.70    0.26 
  -2   8   0    2.16    0.30 
   2  -8   0    1.21    0.23 
  -1   7   1    9.12    0.46 
  -1   7   1    9.05    0.47 
   1  -7  -1    8.08    0.44 
   0   6   2    0.46    0.13 
   0   6   2    0.49    0.13 
   0  -6  -2    0.45    0.13 
   0  -6  -2    0.89    0.15 
   1   5   3   30.51    0.79 
   1   5   3   30.75    0.79 
   1   5   3   31.50    0.78 
  -1  -5  -3   30.85    0.79 
  -1  -5  -3   31.22    0.79 
  -1  -5  -3   30.33    0.78 
   2   4   4   43.41    1.00 
   2   4   4   42.31    1.00 
  -2  -4  -4   43.69    1.01 
  -2  -4  -4   43.88    1.00 
  -2  -4  -4   43.66    0.99 
  -2  -4  -4   44.98    1.00 
   3   3   5    4.77    0.27 
   3   3   5    4.44    0.24 
   3   3   5    4.73    0.26 
   3   3   5    4.09    0.25 
  -3  -3  -5    4.10    0.25 
  -3  -3  -5    4.91    0.26 
   4   2   6    0.15    0.10 
   4   2   6    0.32    0.13 
   4   2   6    0.45    0.14 
   4   2   6    0.17    0.10 
  -4  -2  -6    0.37    0.12 
   5   1   7   25.64    0.82 
   5   1   7   24.86    0.83 
  -5  -1  -7   25.10    0.80 
   6   0   8    0.44    0.20 
   6   0   8    0.25    0.15 
  -6   0  -8    0.49    0.18 
   7  -1   9    0.14    0.16 
  -3   9   0    0.05    0.20 
   3  -9   0    0.20    0.18 
  -2   8   1    0.06    0.16 
  -2   8   1    0.47    0.18 
   2  -8  -1    0.66    0.20 
  -1   7   2    0.36    0.17 
  -1   7   2    0.34    0.16 
   1  -7  -2    0.47    0.15 
   0   6   3   13.53    0.52 
   0   6   3   14.26    0.53 
   0  -6  -3   13.40    0.51 
   0  -6  -3   13.47    0.50 
   1   5   4   44.42    1.08 
   1   5   4   45.74    1.06 
   1   5   4   44.48    1.08 
  -1  -5  -4   46.98    1.07 
  -1  -5  -4   45.95    1.07 
  -1  -5  -4   45.57    1.07 
   2   4   5   20.41    0.59 
   2   4   5   19.07    0.57 
   2   4   5   19.66    0.58 
  -2  -4  -5   19.94    0.56 
  -2  -4  -5   19.87    0.57 
  -2  -4  -5   20.01    0.58 
  -2  -4  -5   18.57    0.56 
   3   3   6   14.32    0.50 
   3   3   6   13.73    0.48 
   3   3   6   14.45    0.48 
   3   3   6   13.39    0.48 
  -3  -3  -6   13.73    0.48 
  -3  -3  -6   13.85    0.31 
   4   2   7    1.93    0.23 
   4   2   7    1.83    0.22 
  -4  -2  -7    1.99    0.22 
   5   1   8    1.87    0.26 
   5   1   8    1.77    0.26 
   5   1   8    2.22    0.31 
  -5  -1  -8    1.57    0.23 
   6   0   9   -0.01    0.15 
   6   0   9    0.22    0.16 
  -6   0  -9    0.00    0.15 
   7  -1  10    1.73    0.31 
  -3   9   1    0.54    0.22 
  -3   9   1   -0.14    0.18 
   3  -9  -1    0.11    0.17 
  -2   8   2    0.57    0.20 
  -2   8   2    0.50    0.20 
   2  -8  -2    0.39    0.18 
  -1   7   3    0.52    0.18 
  -1   7   3    0.74    0.19 
   1  -7  -3    0.62    0.17 
   0   6   4    5.53    0.34 
   0   6   4    5.64    0.34 
   0   6   4    5.87    0.35 
   0  -6  -4    5.16    0.31 
   1   5   5    4.45    0.28 
   1   5   5    4.96    0.29 
   1   5   5    4.37    0.26 
  -1  -5  -5    4.75    0.29 
  -1  -5  -5    4.73    0.27 
  -1  -5  -5    4.97    0.33 
   2   4   6   61.64    1.39 
   2   4   6   61.86    1.39 
   2   4   6   62.85    1.40 
  -2  -4  -6   62.79    1.36 
  -2  -4  -6   61.75    1.38 
   3   3   7   25.83    0.74 
   3   3   7   24.34    0.74 
   3   3   7   25.50    0.74 
   3   3   7   25.92    0.75 
  -3  -3  -7   26.91    0.74 
   4   2   8    0.22    0.15 
   4   2   8   -0.05    0.10 
   4   2   8    0.09    0.12 
  -4  -2  -8    0.11    0.11 
   5   1   9   27.29    0.92 
   5   1   9   26.57    0.92 
   5   1   9   25.79    0.88 
  -5  -1  -9   26.97    0.85 
   6   0  10    2.21    0.33 
   6   0  10    1.51    0.27 
  -3   9   2    0.05    0.20 
  -3   9   2   -0.17    0.16 
   3  -9  -2    0.04    0.16 
  -2   8   3    6.41    0.46 
  -2   8   3    6.39    0.46 
   2  -8  -3    6.30    0.43 
  -1   7   4    0.66    0.18 
  -1   7   4    0.75    0.21 
   1  -7  -4    0.58    0.17 
   0   6   5    8.20    0.42 
   0   6   5    9.04    0.41 
   0   6   5    8.44    0.44 
   0  -6  -5    8.65    0.40 
   1   5   6    3.20    0.26 
   1   5   6    3.28    0.25 
   1   5   6    3.72    0.25 
  -1  -5  -6    3.11    0.24 
  -1  -5  -6    3.26    0.26 
   2   4   7    1.68    0.20 
   2   4   7    1.43    0.19 
   2   4   7    1.39    0.19 
  -2  -4  -7    1.37    0.11 
  -2  -4  -7    1.26    0.16 
  -2  -4  -7    1.10    0.16 
   3   3   8    2.92    0.27 
   3   3   8    2.64    0.25 
   3   3   8    3.40    0.27 
   3   3   8    3.45    0.27 
  -3  -3  -8    3.38    0.24 
  -3  -3  -8    3.28    0.25 
   4   2   9    1.56    0.26 
   4   2   9    1.17    0.22 
   4   2   9    1.99    0.25 
  -4  -2  -9    1.65    0.21 
   5   1  10    6.57    0.48 
   5   1  10    7.24    0.46 
   5   1  10    6.71    0.47 
  -5  -1 -10    6.86    0.41 
   6   0  11    0.25    0.20 
   6   0  11    0.24    0.16 
  -3   9   3    1.79    0.33 
  -3   9   3    1.11    0.28 
   3  -9  -3    1.02    0.25 
  -2   8   4    0.11    0.17 
  -2   8   4   -0.05    0.15 
   2  -8  -4    0.26    0.15 
  -1   7   5   19.96    0.74 
  -1   7   5   19.03    0.74 
   1  -7  -5   20.25    0.71 
   0   6   6    1.32    0.22 
   0   6   6    1.32    0.21 
   0   6   6    1.12    0.18 
   0  -6  -6    1.20    0.19 
   1   5   7   -0.03    0.08 
   1   5   7   -0.05    0.11 
   1   5   7   -0.02    0.11 
  -1  -5  -7   -0.06    0.08 
  -1  -5  -7   -0.12    0.09 
  -1  -5  -7    0.06    0.10 
   2   4   8    0.72    0.16 
   2   4   8    0.96    0.18 
   2   4   8    0.56    0.15 
  -2  -4  -8    0.72    0.15 
  -2  -4  -8    0.84    0.15 
  -2  -4  -8    0.73    0.07 
   3   3   9    1.64    0.22 
   3   3   9    2.28    0.26 
   3   3   9    2.27    0.26 
   3   3   9    2.70    0.31 
  -3  -3  -9    2.47    0.24 
  -3  -3  -9    1.97    0.21 
   4   2  10    0.79    0.20 
   4   2  10    0.60    0.21 
   4   2  10    0.73    0.18 
  -4  -2 -10    0.66    0.16 
   5   1  11    0.79    0.20 
   5   1  11    1.38    0.27 
   5   1  11    1.18    0.30 
   6   0  12    0.32    0.22 
   6   0  12    0.02    0.18 
  -3   9   4    0.07    0.20 
  -3   9   4    0.28    0.24 
   3  -9  -4    0.13    0.16 
  -2   8   5   13.14    0.67 
  -2   8   5   13.21    0.64 
   2  -8  -5   12.28    0.60 
  -1   7   6    2.24    0.30 
  -1   7   6    1.94    0.28 
   1  -7  -6    1.70    0.24 
   0   6   7    0.43    0.14 
   0   6   7    0.42    0.16 
   0   6   7    0.59    0.17 
   0  -6  -7    0.54    0.16 
   0  -6  -7    0.39    0.16 
   1   5   8   34.35    0.97 
   1   5   8   36.23    0.99 
   1   5   8   34.84    0.95 
  -1  -5  -8   35.05    0.94 
  -1  -5  -8   35.56    0.83 
  -1  -5  -8   36.50    0.93 
   2   4   9   13.99    0.57 
   2   4   9   15.48    0.58 
   2   4   9   14.70    0.56 
  -2  -4  -9   15.89    0.54 
  -2  -4  -9   15.07    0.52 
   3   3  10   -0.04    0.13 
   3   3  10   -0.15    0.09 
   3   3  10   -0.17    0.11 
   3   3  10   -0.05    0.12 
  -3  -3 -10    0.06    0.10 
  -3  -3 -10    0.05    0.09 
   4   2  11   -0.10    0.16 
   4   2  11   -0.11    0.14 
   4   2  11    0.07    0.13 
  -4  -2 -11    0.04    0.11 
   5   1  12    0.54    0.25 
   5   1  12    0.42    0.19 
   5   1  12    0.40    0.20 
  -3   9   5    0.52    0.25 
  -3   9   5    0.48    0.26 
   3  -9  -5    0.23    0.19 
  -2   8   6    0.93    0.25 
  -2   8   6    0.99    0.25 
   2  -8  -6    0.89    0.21 
  -1   7   7    0.19    0.17 
  -1   7   7    0.67    0.22 
   1  -7  -7    0.56    0.17 
   0   6   8    1.12    0.19 
   0   6   8    0.99    0.21 
   0   6   8    1.10    0.22 
   0  -6  -8    1.11    0.20 
   0  -6  -8    1.30    0.23 
   1   5   9    0.34    0.16 
   1   5   9    0.46    0.17 
  -1  -5  -9    0.25    0.12 
  -1  -5  -9    0.31    0.10 
  -1  -5  -9    0.32    0.13 
   2   4  10    7.51    0.42 
   2   4  10    7.76    0.42 
   2   4  10    8.82    0.45 
  -2  -4 -10    5.44    0.31 
  -2  -4 -10    7.91    0.37 
   3   3  11    7.23    0.44 
   3   3  11    6.98    0.46 
   3   3  11    6.69    0.41 
  -3  -3 -11    7.28    0.40 
  -3  -3 -11    6.59    0.34 
   4   2  12   22.71    0.86 
   4   2  12   21.24    0.82 
   4   2  12   23.83    0.93 
   5   1  13    2.99    0.41 
   5   1  13    2.86    0.44 
   5   1  13    2.91    0.37 
  -3   9   6   -0.21    0.17 
  -3   9   6   -0.33    0.19 
  -2   8   7    0.67    0.24 
  -2   8   7    0.42    0.23 
   2  -8  -7    0.61    0.18 
  -1   7   8    1.78    0.27 
  -1   7   8    2.54    0.33 
   1  -7  -8    1.85    0.27 
   1  -7  -8    2.28    0.28 
   0   6   9   12.25    0.57 
   0   6   9   12.01    0.56 
   0   6   9   12.63    0.54 
   0  -6  -9   12.41    0.51 
   0  -6  -9   11.21    0.50 
   1   5  10   11.23    0.52 
   1   5  10   10.97    0.52 
  -1  -5 -10   11.13    0.38 
  -1  -5 -10   10.33    0.45 
  -1  -5 -10   10.96    0.45 
   2   4  11   -0.11    0.11 
   2   4  11    0.03    0.13 
  -2  -4 -11    0.00    0.10 
  -2  -4 -11    0.14    0.10 
   3   3  12    0.84    0.25 
   3   3  12    0.67    0.18 
   3   3  12    0.41    0.18 
   4   2  13    2.46    0.34 
   4   2  13    1.95    0.30 
   4   2  13    2.60    0.41 
  -3   9   7    0.02    0.23 
  -3   9   7   -0.07    0.19 
  -2   8   8    0.27    0.20 
  -2   8   8    0.18    0.22 
  -1   7   9    0.12    0.16 
  -1   7   9   -0.19    0.14 
   1  -7  -9    0.14    0.16 
   1  -7  -9    0.26    0.15 
   0   6  10    1.27    0.25 
   0   6  10    1.32    0.25 
   0  -6 -10    1.27    0.21 
   0  -6 -10    1.40    0.21 
   1   5  11    0.18    0.15 
   1   5  11    0.40    0.16 
  -1  -5 -11   -0.01    0.09 
   2   4  12    0.14    0.14 
   2   4  12   -0.10    0.13 
   2   4  12   -0.03    0.17 
   3   3  13    1.03    0.23 
   3   3  13    0.73    0.26 
   3   3  13    0.53    0.18 
   4   2  14    0.33    0.24 
   4   2  14    0.00    0.17 
   4   2  14    0.28    0.22 
  -3   9   8    0.60    0.27 
  -3   9   8    1.64    0.36 
  -2   8   9   -0.22    0.19 
  -2   8   9    0.22    0.18 
  -1   7  10    2.73    0.35 
  -1   7  10    2.43    0.34 
   0   6  11    0.14    0.15 
   0   6  11    0.43    0.19 
   1   5  12    3.93    0.39 
   1   5  12    3.03    0.33 
   2   4  13    2.40    0.33 
   2   4  13    2.34    0.31 
   2   4  13    2.16    0.37 
   3   3  14   -0.13    0.13 
   3   3  14    0.09    0.24 
   3   3  14   -0.04    0.15 
  -2   8  10    0.00    0.18 
  -2   8  10   -0.16    0.18 
  -1   7  11    1.46    0.29 
  -1   7  11    1.68    0.30 
   0   6  12   -0.20    0.13 
   0   6  12   -0.27    0.12 
   1   5  13    2.90    0.34 
   1   5  13    3.02    0.37 
   2   4  14    0.22    0.18 
   2   4  14    0.13    0.24 
   2   4  14    0.05    0.15 
  -2   8  11   -0.03    0.18 
  -2   8  11    0.27    0.23 
  -1   7  12    1.19    0.29 
  -1   7  12    1.23    0.28 
   0   6  13    0.21    0.19 
   0   6  13    0.03    0.17 
   1   5  14    0.26    0.19 
   1   5  14   -0.04    0.17 
  -6  -1  10    0.13    0.21 
  -6  -1  10    0.19    0.13 
  -4  -3  11    1.61    0.31 
  -4  -3  11    1.87    0.29 
  -5  -2  10    0.32    0.19 
  -5  -2  10    0.39    0.11 
  -6  -1   9   -0.07    0.10 
  -6  -1   9    0.19    0.18 
  -7   0   8    0.87    0.30 
  -7   0   8    1.24    0.23 
  -3  -4  11    0.08    0.16 
  -3  -4  11    0.02    0.17 
  -4  -3  10   -0.13    0.13 
  -5  -2   9    1.53    0.16 
  -5  -2   9    1.89    0.31 
  -6  -1   8    0.63    0.22 
  -6  -1   8    0.53    0.14 
  -7   0   7    0.74    0.26 
  -7   0   7    0.56    0.17 
  -8   1   6   -0.08    0.24 
  -8   1   6    0.35    0.20 
  -2  -5  11    1.41    0.28 
  -2  -5  11    1.24    0.13 
  -3  -4  10   -0.11    0.14 
  -4  -3   9    0.03    0.13 
  -5  -2   8    4.41    0.43 
  -5  -2   8    4.50    0.24 
  -5  -2   8    4.56    0.22 
  -6  -1   7   13.34    0.67 
  -6  -1   7   13.53    0.51 
  -7   0   6    2.23    0.29 
  -7   0   6    2.18    0.36 
  -8   1   5    0.43    0.20 
  -8   1   5    0.03    0.23 
  -2  -5  10    0.47    0.21 
  -2  -5  10    0.10    0.07 
  -3  -4   9    2.96    0.33 
  -4  -3   8    1.77    0.26 
  -4  -3   8    1.52    0.09 
  -5  -2   7    3.83    0.37 
  -5  -2   7    3.95    0.21 
  -5  -2   7    4.49    0.23 
  -6  -1   6    1.19    0.18 
  -6  -1   6    0.66    0.22 
  -7   0   5    1.07    0.27 
  -7   0   5    0.97    0.21 
  -8   1   4    0.23    0.22 
  -8   1   4    0.39    0.21 
  -1  -6  10    0.34    0.12 
  -1  -6  10    0.26    0.22 
  -2  -5   9   -0.08    0.06 
  -2  -5   9   -0.11    0.14 
  -3  -4   8    1.67    0.24 
  -4  -3   7    0.38    0.16 
  -4  -3   7    0.19    0.05 
  -4  -3   7    0.27    0.05 
  -5  -2   6   13.85    0.43 
  -5  -2   6   13.53    0.60 
  -5  -2   6   13.38    0.41 
  -6  -1   5    4.90    0.41 
  -6  -1   5    4.01    0.29 
  -6  -1   5    4.15    0.27 
  -7   0   4    2.62    0.36 
  -7   0   4    3.07    0.33 
  -8   1   3    3.58    0.39 
  -8   1   3    5.11    0.53 
  -1  -6   9    0.97    0.23 
  -1  -6   9    1.01    0.16 
  -2  -5   8    0.20    0.07 
  -2  -5   8    0.32    0.08 
  -2  -5   8    0.08    0.14 
  -3  -4   7    6.75    0.37 
  -4  -3   6    0.38    0.06 
  -4  -3   6    0.37    0.06 
  -4  -3   6    0.42    0.06 
  -5  -2   5    7.11    0.43 
  -5  -2   5    6.83    0.29 
  -5  -2   5    7.60    0.31 
  -5  -2   5    7.51    0.29 
   6   1  -4    0.75    0.11 
  -6  -1   4    0.57    0.14 
  -6  -1   4    0.66    0.22 
  -6  -1   4    0.64    0.15 
  -6  -1   4    0.76    0.14 
  -7   0   3    1.37    0.24 
  -7   0   3    1.23    0.28 
  -8   1   2    0.55    0.23 
  -8   1   2    0.66    0.27 
  -9   2   1    0.00    0.20 
   0  -7   9    0.02    0.12 
  -1  -6   8    6.84    0.34 
  -1  -6   8    6.23    0.42 
  -2  -5   7   12.74    0.51 
  -2  -5   7   12.16    0.37 
  -2  -5   7   11.90    0.36 
  -2  -5   7   12.11    0.37 
  -3  -4   6    4.71    0.14 
  -3  -4   6    5.36    0.30 
  -3  -4   6    4.76    0.14 
  -3  -4   6    4.63    0.14 
  -4  -3   5    0.40    0.07 
  -4  -3   5    0.61    0.07 
  -4  -3   5    0.41    0.07 
  -5  -2   4   15.28    0.46 
  -5  -2   4   14.57    0.46 
  -5  -2   4   15.05    0.61 
  -5  -2   4   15.68    0.46 
   6   1  -3    0.59    0.11 
  -6  -1   3    0.72    0.15 
  -6  -1   3    0.41    0.13 
  -6  -1   3    0.53    0.15 
  -6  -1   3    0.44    0.20 
   7   0  -2    3.64    0.31 
  -7   0   2    2.98    0.31 
  -7   0   2    3.91    0.42 
  -8   1   1    0.23    0.19 
  -9   2   0    0.43    0.27 
   0  -7   8    5.36    0.36 
  -1  -6   7   10.06    0.41 
  -2  -5   6    0.13    0.07 
  -2  -5   6    0.08    0.06 
  -2  -5   6    0.08    0.11 
  -2  -5   6    0.09    0.07 
  -3  -4   5   26.89    0.55 
  -3  -4   5   27.16    0.55 
  -3  -4   5   26.17    0.55 
  -3  -4   5   27.51    0.72 
  -4  -3   4    1.72    0.12 
  -4  -3   4    1.71    0.11 
  -4  -3   4    1.69    0.12 
   5   2  -3    1.44    0.10 
  -5  -2   3    1.26    0.21 
  -5  -2   3    1.40    0.14 
  -5  -2   3    1.34    0.15 
  -5  -2   3    1.76    0.18 
   6   1  -2    0.23    0.10 
  -6  -1   2    0.11    0.11 
  -6  -1   2   -0.08    0.08 
  -6  -1   2    0.15    0.10 
  -6  -1   2    0.06    0.15 
   7   0  -1   16.54    0.60 
  -7   0   1   15.82    0.64 
  -7   0   1   16.62    0.72 
  -7   0   1   16.36    0.67 
   8  -1   0    0.28    0.20 
  -8   1   0    0.38    0.21 
  -9   2  -1    0.51    0.27 
   0  -7   7    0.06    0.12 
  -1  -6   6    1.88    0.19 
  -1  -6   6    1.59    0.18 
  -2  -5   5    0.23    0.07 
  -2  -5   5    0.29    0.08 
  -2  -5   5    0.13    0.07 
  -2  -5   5    0.39    0.12 
  -3  -4   4   16.22    0.47 
  -3  -4   4   16.10    0.37 
  -3  -4   4   16.02    0.38 
  -4  -3   3    9.04    0.29 
  -4  -3   3    8.98    0.28 
  -4  -3   3    9.16    0.28 
   5   2  -2    7.17    0.26 
   5   2  -2    6.85    0.25 
  -5  -2   2    6.82    0.29 
  -5  -2   2    6.57    0.30 
  -5  -2   2    6.84    0.30 
  -5  -2   2    7.55    0.38 
   6   1  -1    0.19    0.10 
  -6  -1   1    0.24    0.12 
  -6  -1   1    0.01    0.16 
  -6  -1   1   -0.01    0.08 
  -6  -1   1    0.20    0.12 
   7   0   0    0.03    0.12 
  -7   0   0   -0.08    0.16 
  -7   0   0    0.08    0.15 
  -7   0   0    0.06    0.13 
   8  -1   1   -0.07    0.11 
  -8   1  -1   -0.05    0.18 
  -9   2  -2    0.60    0.28 
   1  -8   7    0.07    0.15 
   0  -7   6   18.62    0.66 
  -1  -6   5    4.28    0.27 
  -1  -6   5    4.71    0.28 
  -1  -6   5    3.91    0.26 
  -2  -5   4    0.08    0.06 
  -2  -5   4   -0.03    0.08 
  -2  -5   4    0.01    0.06 
  -2  -5   4    0.06    0.06 
  -3  -4   3   32.43    0.69 
  -3  -4   3   32.45    0.69 
  -3  -4   3   33.41    0.73 
   4   3  -2    4.34    0.12 
   4   3  -2    4.20    0.12 
  -4  -3   2    4.11    0.20 
  -4  -3   2    4.28    0.19 
  -4  -3   2    4.56    0.19 
   5   2  -1    1.32    0.14 
  -5  -2   1    1.23    0.15 
  -5  -2   1    1.28    0.15 
  -5  -2   1    1.18    0.15 
  -5  -2   1    1.19    0.19 
   6   1   0    4.43    0.28 
  -6  -1   0    3.89    0.30 
  -6  -1   0    3.95    0.29 
  -6  -1   0    3.24    0.32 
  -6  -1   0    4.27    0.28 
   7   0   1    1.01    0.20 
  -7   0  -1    0.90    0.23 
  -7   0  -1    1.21    0.24 
   8  -1   2    0.44    0.17 
  -8   1  -2    0.60    0.22 
  -9   2  -3    0.17    0.24 
   1  -8   6    0.09    0.13 
   0  -7   5    1.38    0.21 
   1   6  -4    4.76    0.15 
   1   6  -4    4.85    0.15 
  -1  -6   4    5.03    0.28 
  -1  -6   4    4.93    0.28 
  -1  -6   4    5.13    0.28 
  -2  -5   3   13.82    0.39 
  -2  -5   3   13.69    0.40 
  -2  -5   3   12.93    0.39 
  -2  -5   3   13.11    0.38 
  -3  -4   2    0.87    0.09 
  -3  -4   2    1.03    0.09 
  -3  -4   2    1.00    0.10 
   4   3  -1   24.72    0.56 
  -4  -3   1   23.93    0.59 
  -4  -3   1   24.19    0.60 
  -4  -3   1   24.15    0.60 
   5   2   0    3.85    0.22 
  -5  -2   0    3.81    0.23 
  -5  -2   0    4.15    0.25 
  -5  -2   0    3.73    0.24 
  -5  -2   0    3.90    0.27 
   6   1   1    0.44    0.13 
  -6  -1  -1    0.63    0.15 
  -6  -1  -1    0.31    0.14 
  -6  -1  -1    0.63    0.18 
   7   0   2    0.31    0.15 
  -7   0  -2    0.64    0.21 
  -7   0  -2    0.32    0.17 
   8  -1   3    1.06    0.24 
  -8   1  -3    0.95    0.26 
   1  -8   5    0.02    0.13 
   0   7  -4    5.92    0.28 
   0  -7   4    5.71    0.37 
   0  -7   4    5.21    0.35 
   1   6  -3    0.65    0.12 
  -1  -6   3    0.55    0.12 
  -1  -6   3    0.50    0.12 
  -1  -6   3    0.66    0.13 
   2   5  -2   12.77    0.31 
   2   5  -2   13.00    0.32 
  -2  -5   2   13.71    0.40 
  -2  -5   2   12.52    0.39 
  -2  -5   2   13.23    0.39 
   3   4  -1   19.38    0.44 
   3   4  -1   19.10    0.42 
  -3  -4   1   19.47    0.48 
  -3  -4   1   19.42    0.40 
  -3  -4   1   19.50    0.48 
  -3  -4   1   19.06    0.49 
   4   3   0   50.76    1.21 
   4   3   0   62.72    1.24 
   4   3   0   62.41    1.24 
  -4  -3   0   62.01    1.28 
  -4  -3   0   62.06    1.27 
  -4  -3   0   62.25    1.26 
   5   2   1    3.76    0.24 
   5   2   1    3.20    0.22 
  -5  -2  -1    3.60    0.23 
  -5  -2  -1    3.54    0.23 
  -5  -2  -1    3.46    0.24 
  -5  -2  -1    3.10    0.24 
   6   1   2   47.48    1.19 
  -6  -1  -2   47.48    1.22 
  -6  -1  -2   46.62    1.18 
  -6  -1  -2   47.69    1.20 
   7   0   3   -0.17    0.11 
  -7   0  -3   -0.14    0.14 
   8  -1   4   -0.09    0.12 
  -8   1  -4    0.04    0.19 
   2  -9   5   -0.25    0.13 
   1  -8   4    2.07    0.28 
   0   7  -3   28.14    0.76 
   0  -7   3   28.28    0.85 
   0  -7   3   28.05    0.85 
   0  -7   3   29.24    0.85 
   1   6  -2   19.36    0.52 
   1   6  -2   18.91    0.53 
   1   6  -2   18.80    0.52 
  -1  -6   2   18.92    0.58 
  -1  -6   2   19.93    0.59 
  -1  -6   2   19.06    0.58 
   2   5  -1   20.44    0.50 
   2   5  -1   20.11    0.45 
   2   5  -1   20.38    0.49 
  -2  -5   1   20.15    0.53 
  -2  -5   1   20.32    0.54 
  -2  -5   1   20.29    0.54 
   3   4   0  146.40    2.66 
   3   4   0  140.18    2.64 
  -3  -4   0  140.22    2.68 
  -3  -4   0  140.95    2.68 
  -3  -4   0  142.09    2.68 
   4   3   1   33.23    0.78 
   4   3   1   33.78    0.78 
   4   3   1   34.49    0.79 
  -4  -3  -1   31.72    0.79 
  -4  -3  -1   32.57    0.78 
  -4  -3  -1   32.86    0.79 
   5   2   2    0.11    0.09 
   5   2   2    0.24    0.11 
  -5  -2  -2    0.10    0.09 
  -5  -2  -2    0.31    0.10 
  -5  -2  -2    0.09    0.10 
  -5  -2  -2    0.17    0.11 
  -5  -2  -2    0.06    0.09 
   6   1   3   53.83    1.34 
  -6  -1  -3   53.88    1.31 
  -6  -1  -3   55.25    1.36 
   7   0   4    0.21    0.14 
  -7   0  -4    0.49    0.18 
   8  -1   5    0.89    0.23 
  -8   1  -5    0.57    0.23 
   2  -9   4   -0.11    0.12 
  -1   8  -3    0.17    0.13 
   1  -8   3    0.08    0.13 
   0   7  -2    4.93    0.30 
   0  -7   2    5.37    0.34 
   0  -7   2    4.70    0.33 
   0  -7   2    5.56    0.35 
   1   6  -1   24.47    0.64 
   1   6  -1   23.78    0.61 
  -1  -6   1   23.55    0.67 
  -1  -6   1   23.11    0.66 
  -1  -6   1   23.93    0.67 
   2   5   0    9.75    0.32 
   2   5   0    9.54    0.24 
  -2  -5   0   10.09    0.34 
  -2  -5   0   10.52    0.35 
  -2  -5   0    9.81    0.34 
   3   4   1   24.18    0.59 
   3   4   1   24.09    0.59 
  -3  -4  -1   24.02    0.60 
  -3  -4  -1   23.96    0.60 
  -3  -4  -1   23.99    0.61 
   4   3   2   19.43    0.55 
   4   3   2   20.39    0.56 
   4   3   2   20.20    0.56 
  -4  -3  -2   19.74    0.56 
  -4  -3  -2   20.04    0.56 
  -4  -3  -2   19.84    0.57 
  -4  -3  -2   19.73    0.48 
   5   2   3   78.78    1.69 
   5   2   3   77.25    1.68 
  -5  -2  -3   76.52    1.61 
  -5  -2  -3   77.03    1.77 
  -5  -2  -3   77.87    1.67 
  -5  -2  -3   76.99    1.63 
  -5  -2  -3   74.61    1.68 
   6   1   4    0.89    0.17 
   6   1   4    1.36    0.24 
  -6  -1  -4    1.47    0.25 
  -6  -1  -4    1.14    0.20 
   7   0   5    1.10    0.22 
  -7   0  -5    0.99    0.23 
   8  -1   6    1.51    0.27 
  -8   1  -6    1.08    0.28 
   2  -9   3    0.05    0.16 
  -1   8  -2    3.47    0.32 
   1  -8   2    4.71    0.37 
   0   7  -1   12.53    0.49 
   0   7  -1   12.71    0.49 
   0  -7   1   13.05    0.53 
   0  -7   1   12.98    0.52 
   0  -7   1   12.70    0.52 
   1   6   0   35.79    0.87 
   1   6   0   35.65    0.87 
  -1  -6   0   36.55    0.91 
  -1  -6   0   35.24    0.89 
  -1  -6   0   34.89    0.89 
   2   5   1   17.47    0.50 
   2   5   1   17.29    0.49 
  -2  -5  -1   17.27    0.50 
  -2  -5  -1   17.94    0.51 
  -2  -5  -1   18.20    0.51 
   3   4   2    0.86    0.12 
   3   4   2    0.91    0.12 
   3   4   2    0.83    0.07 
  -3  -4  -2    0.96    0.12 
  -3  -4  -2    0.84    0.12 
  -3  -4  -2    1.00    0.14 
   4   3   3  102.50    2.04 
   4   3   3  100.66    2.03 
   4   3   3   98.33    2.03 
  -4  -3  -3  101.92    2.04 
  -4  -3  -3   96.20    2.02 
  -4  -3  -3  100.89    2.02 
  -4  -3  -3  100.19    1.94 
   5   2   4    0.32    0.11 
   5   2   4    0.41    0.13 
  -5  -2  -4    0.41    0.12 
  -5  -2  -4    0.32    0.11 
  -5  -2  -4    0.33    0.12 
  -5  -2  -4    0.39    0.11 
   6   1   5   20.76    0.76 
   6   1   5   20.79    0.74 
  -6  -1  -5   22.45    0.76 
   7   0   6    0.01    0.14 
  -7   0  -6    0.17    0.17 
   8  -1   7    0.41    0.20 
  -8   1  -7    0.43    0.23 
   2  -9   2    0.03    0.15 
  -1   8  -1    4.00    0.35 
  -1   8  -1    3.63    0.34 
   1  -8   1    3.68    0.35 
   0   7   0    0.75    0.16 
   0   7   0    0.76    0.17 
   0  -7   0    1.04    0.18 
   0  -7   0    0.88    0.16 
   1   6   1   12.32    0.44 
   1   6   1   11.96    0.43 
  -1  -6  -1   11.75    0.44 
  -1  -6  -1   12.39    0.45 
  -1  -6  -1   11.75    0.44 
   2   5   2   18.74    0.54 
   2   5   2   18.84    0.55 
  -2  -5  -2   19.33    0.55 
  -2  -5  -2   19.67    0.55 
  -2  -5  -2   18.80    0.55 
   3   4   3   31.75    0.78 
   3   4   3   30.12    0.66 
   3   4   3   30.37    0.77 
   3   4   3   31.61    0.77 
  -3  -4  -3   31.02    0.77 
  -3  -4  -3   30.45    0.76 
  -3  -4  -3   31.41    0.78 
   4   3   4   18.44    0.57 
   4   3   4   18.83    0.52 
   4   3   4   18.01    0.56 
  -4  -3  -4   19.15    0.56 
  -4  -3  -4   18.07    0.51 
  -4  -3  -4   18.65    0.56 
  -4  -3  -4   17.73    0.48 
  -4  -3  -4   18.00    0.57 
   5   2   5    6.00    0.35 
   5   2   5    5.84    0.34 
  -5  -2  -5    5.07    0.26 
  -5  -2  -5    5.36    0.33 
   6   1   6   13.47    0.59 
   6   1   6   13.29    0.60 
  -6  -1  -6   12.62    0.58 
   7   0   7    1.73    0.29 
  -7   0  -7    2.15    0.31 
   8  -1   8    5.30    0.52 
  -8   1  -8    6.02    0.58 
  -2   9  -1    2.33    0.33 
   2  -9   1    2.37    0.34 
  -1   8   0    1.48    0.25 
  -1   8   0    1.48    0.26 
   1  -8   0    1.34    0.22 
   0   7   1    9.53    0.44 
   0   7   1    9.29    0.44 
   0  -7  -1    9.29    0.44 
   0  -7  -1    9.66    0.45 
   1   6   2    3.86    0.26 
   1   6   2    4.20    0.26 
  -1  -6  -2    3.91    0.26 
  -1  -6  -2    4.05    0.26 
  -1  -6  -2    4.27    0.26 
   2   5   3   19.33    0.56 
   2   5   3   17.91    0.55 
  -2  -5  -3   18.65    0.57 
  -2  -5  -3   19.45    0.56 
  -2  -5  -3   18.18    0.55 
  -2  -5  -3   18.06    0.54 
   3   4   4   16.96    0.52 
   3   4   4   16.24    0.51 
   3   4   4   17.18    0.52 
   3   4   4   15.98    0.44 
  -3  -4  -4   16.20    0.52 
  -3  -4  -4   16.73    0.51 
  -3  -4  -4   16.30    0.50 
   4   3   5    5.26    0.27 
   4   3   5    5.08    0.29 
   4   3   5    5.41    0.30 
   4   3   5    5.81    0.31 
  -4  -3  -5    5.04    0.30 
  -4  -3  -5    5.48    0.22 
  -4  -3  -5    5.97    0.29 
   5   2   6    7.14    0.40 
   5   2   6    6.78    0.38 
  -5  -2  -6    7.15    0.39 
   6   1   7    0.50    0.20 
   6   1   7    0.17    0.17 
  -6  -1  -7    0.34    0.18 
   7   0   8    1.81    0.29 
   7   0   8    2.74    0.38 
  -7   0  -8    2.67    0.36 
  -2   9   0    0.31    0.20 
  -2   9   0    0.58    0.21 
   2  -9   0    0.31    0.18 
  -1   8   1    6.93    0.45 
  -1   8   1    6.23    0.42 
   1  -8  -1    7.04    0.44 
   0   7   2    8.94    0.44 
   0   7   2    8.04    0.42 
   0  -7  -2    7.52    0.40 
   0  -7  -2    7.77    0.41 
   1   6   3    6.33    0.33 
   1   6   3    6.86    0.34 
  -1  -6  -3    6.36    0.33 
  -1  -6  -3    6.28    0.32 
  -1  -6  -3    6.16    0.34 
   2   5   4    0.61    0.13 
   2   5   4    0.71    0.14 
  -2  -5  -4    0.52    0.12 
  -2  -5  -4    0.80    0.13 
  -2  -5  -4    0.60    0.12 
  -2  -5  -4    0.59    0.12 
   3   4   5    2.56    0.21 
   3   4   5    2.77    0.24 
   3   4   5    2.52    0.21 
   3   4   5    2.23    0.17 
  -3  -4  -5    2.40    0.20 
  -3  -4  -5    2.35    0.19 
   4   3   6    0.08    0.10 
   4   3   6   -0.11    0.08 
   4   3   6   -0.08    0.08 
  -4  -3  -6    0.04    0.05 
  -4  -3  -6   -0.04    0.09 
   5   2   7    2.19    0.25 
   5   2   7    2.21    0.26 
   5   2   7    2.35    0.27 
  -5  -2  -7    2.87    0.30 
   6   1   8    0.38    0.19 
   6   1   8   -0.04    0.12 
  -6  -1  -8    0.12    0.15 
   7   0   9    0.17    0.16 
   7   0   9    0.10    0.21 
  -7   0  -9    0.29    0.21 
  -3  10   0    0.65    0.29 
   3 -10   0    0.78    0.28 
  -2   9   1    1.41    0.28 
  -2   9   1    1.20    0.26 
   2  -9  -1    0.79    0.21 
  -1   8   2    1.02    0.23 
  -1   8   2    0.87    0.21 
   1  -8  -2    0.81    0.21 
   0   7   3    0.87    0.18 
   0   7   3    0.85    0.20 
   0  -7  -3    0.92    0.17 
   1   6   4   15.81    0.56 
   1   6   4   16.10    0.54 
   1   6   4   15.62    0.56 
  -1  -6  -4   16.13    0.55 
  -1  -6  -4   16.37    0.55 
   2   5   5    5.54    0.30 
   2   5   5    5.57    0.31 
  -2  -5  -5    6.21    0.31 
  -2  -5  -5    5.78    0.29 
  -2  -5  -5    5.82    0.32 
   3   4   6   37.12    0.90 
   3   4   6   37.86    0.95 
   3   4   6   36.34    0.95 
   3   4   6   36.70    0.94 
  -3  -4  -6   36.63    0.92 
  -3  -4  -6   36.63    0.94 
   4   3   7   10.23    0.44 
   4   3   7   10.12    0.44 
   4   3   7    9.88    0.45 
  -4  -3  -7   10.16    0.44 
   5   2   8    0.49    0.19 
   5   2   8    0.73    0.19 
   5   2   8    0.57    0.18 
  -5  -2  -8    0.56    0.17 
   6   1   9    0.36    0.17 
   6   1   9    0.09    0.18 
  -6  -1  -9   -0.11    0.13 
   7   0  10    0.23    0.21 
   7   0  10    0.45    0.19 
  -3  10   1    1.68    0.36 
   3 -10  -1    1.35    0.32 
  -2   9   2    3.20    0.38 
  -2   9   2    2.82    0.36 
   2  -9  -2    2.84    0.34 
  -1   8   3    0.50    0.19 
  -1   8   3    0.23    0.18 
   1  -8  -3   -0.02    0.14 
   0   7   4    1.43    0.23 
   0   7   4    1.90    0.25 
   0  -7  -4    1.52    0.22 
   1   6   5    1.16    0.17 
   1   6   5    0.66    0.15 
   1   6   5    0.90    0.17 
  -1  -6  -5    1.04    0.17 
   2   5   6    7.98    0.38 
   2   5   6    7.52    0.37 
  -2  -5  -6    6.97    0.35 
  -2  -5  -6    7.25    0.34 
   3   4   7    5.43    0.32 
   3   4   7    5.01    0.32 
   3   4   7    4.86    0.31 
   3   4   7    5.44    0.31 
  -3  -4  -7    4.96    0.31 
  -3  -4  -7    5.02    0.29 
   4   3   8   13.96    0.57 
   4   3   8   15.57    0.58 
   4   3   8   13.93    0.56 
  -4  -3  -8   15.10    0.56 
   5   2   9   16.22    0.68 
   5   2   9   17.09    0.70 
   5   2   9   15.85    0.65 
  -5  -2  -9   16.86    0.64 
   6   1  10    0.00    0.17 
   6   1  10    0.00    0.14 
  -6  -1 -10    0.03    0.14 
   7   0  11    0.27    0.22 
   7   0  11   -0.01    0.24 
  -3  10   2   -0.05    0.23 
   3 -10  -2    0.21    0.19 
  -2   9   3    0.60    0.24 
  -2   9   3    0.39    0.20 
   2  -9  -3    0.47    0.19 
  -1   8   4    0.88    0.22 
  -1   8   4    0.64    0.21 
   1  -8  -4    0.84    0.21 
   0   7   5   -0.05    0.12 
   0   7   5    0.22    0.15 
   0  -7  -5    0.11    0.12 
   1   6   6    4.34    0.32 
   1   6   6    3.81    0.31 
   1   6   6    4.23    0.28 
  -1  -6  -6    5.03    0.31 
  -1  -6  -6    4.46    0.32 
   2   5   7    1.86    0.23 
   2   5   7    1.91    0.22 
  -2  -5  -7    1.91    0.21 
  -2  -5  -7    1.60    0.21 
   3   4   8    6.77    0.38 
   3   4   8    6.39    0.46 
   3   4   8    6.26    0.36 
   3   4   8    7.22    0.38 
  -3  -4  -8    6.02    0.35 
  -3  -4  -8    7.38    0.35 
   4   3   9    2.45    0.28 
   4   3   9    3.25    0.34 
   4   3   9    2.94    0.30 
  -4  -3  -9    3.14    0.29 
   5   2  10   11.35    0.57 
   5   2  10   11.39    0.58 
   5   2  10   10.57    0.57 
  -5  -2 -10   10.22    0.50 
   6   1  11    0.60    0.24 
   6   1  11    1.20    0.27 
  -3  10   3   -0.23    0.22 
  -3  10   3   -0.20    0.20 
   3 -10  -3   -0.03    0.19 
  -2   9   4    0.64    0.26 
  -2   9   4    0.27    0.21 
   2  -9  -4    0.35    0.18 
  -1   8   5    0.32    0.19 
  -1   8   5    0.44    0.21 
   1  -8  -5    0.06    0.13 
   0   7   6    0.73    0.21 
   0   7   6    0.62    0.20 
   0  -7  -6    0.65    0.17 
   1   6   7    0.47    0.16 
   1   6   7    0.16    0.14 
   1   6   7    0.51    0.14 
  -1  -6  -7    0.42    0.14 
  -1  -6  -7    0.36    0.15 
   2   5   8    6.24    0.38 
   2   5   8    5.65    0.35 
  -2  -5  -8    6.27    0.33 
  -2  -5  -8    6.06    0.24 
  -2  -5  -8    5.91    0.35 
   3   4   9    0.59    0.17 
   3   4   9    0.44    0.14 
   3   4   9    0.53    0.17 
  -3  -4  -9    0.57    0.13 
  -3  -4  -9    0.55    0.14 
   4   3  10    1.27    0.24 
   4   3  10    1.16    0.21 
   4   3  10    1.12    0.22 
  -4  -3 -10    0.82    0.16 
  -4  -3 -10    1.34    0.20 
   5   2  11   11.81    0.60 
   5   2  11   11.13    0.60 
   5   2  11   12.26    0.65 
  -5  -2 -11   10.57    0.52 
   6   1  12    0.84    0.24 
   6   1  12    0.74    0.25 
  -3  10   4    0.15    0.24 
  -3  10   4    0.13    0.26 
   3 -10  -4   -0.04    0.16 
  -2   9   5    0.60    0.22 
  -2   9   5    1.24    0.30 
   2  -9  -5    0.55    0.19 
  -1   8   6    3.27    0.38 
  -1   8   6    2.91    0.36 
   1  -8  -6    2.34    0.28 
   0   7   7    8.90    0.48 
   0   7   7    8.72    0.51 
   0  -7  -7    7.92    0.47 
   0  -7  -7    8.88    0.46 
   1   6   8    1.81    0.26 
   1   6   8    1.41    0.23 
   1   6   8    1.48    0.21 
  -1  -6  -8    1.78    0.22 
  -1  -6  -8    1.76    0.24 
   2   5   9    6.74    0.41 
   2   5   9    7.16    0.41 
  -2  -5  -9    6.88    0.24 
  -2  -5  -9    6.95    0.38 
  -2  -5  -9    6.65    0.36 
   3   4  10    0.19    0.14 
   3   4  10   -0.14    0.12 
   3   4  10    0.22    0.18 
  -3  -4 -10    0.04    0.11 
  -3  -4 -10    0.13    0.10 
   4   3  11    0.19    0.18 
   4   3  11    0.26    0.16 
   4   3  11    0.29    0.18 
  -4  -3 -11    0.30    0.13 
   5   2  12    0.54    0.19 
   5   2  12    0.92    0.28 
   5   2  12    0.67    0.23 
  -3  10   5    1.35    0.37 
  -3  10   5    1.21    0.32 
  -2   9   6    0.24    0.23 
  -2   9   6    0.56    0.23 
   2  -9  -6    0.17    0.16 
  -1   8   7    2.46    0.34 
  -1   8   7    2.28    0.35 
   1  -8  -7    2.18    0.28 
   0   7   8    2.33    0.30 
   0   7   8    2.13    0.29 
   0  -7  -8    1.84    0.27 
   0  -7  -8    2.05    0.26 
   1   6   9    5.73    0.40 
   1   6   9    5.71    0.40 
   1   6   9    5.85    0.37 
  -1  -6  -9    6.38    0.38 
  -1  -6  -9    6.16    0.37 
   2   5  10   19.58    0.73 
   2   5  10   19.81    0.71 
  -2  -5 -10   19.84    0.66 
  -2  -5 -10   19.13    0.64 
   3   4  11    0.45    0.17 
   3   4  11    0.44    0.19 
   3   4  11    0.80    0.20 
  -3  -4 -11    0.66    0.15 
  -3  -4 -11    0.61    0.15 
   4   3  12   11.37    0.63 
   4   3  12   11.38    0.59 
   4   3  12   12.40    0.63 
   5   2  13    3.39    0.41 
   5   2  13    3.64    0.47 
   5   2  13    3.49    0.41 
  -2   9   7    0.06    0.18 
  -2   9   7    0.18    0.22 
   2  -9  -7   -0.04    0.15 
  -1   8   8    0.05    0.18 
  -1   8   8    0.47    0.21 
   1  -8  -8    0.28    0.20 
   1  -8  -8    0.39    0.17 
   0   7   9    0.67    0.20 
   0   7   9    0.37    0.18 
   0  -7  -9    0.48    0.16 
   0  -7  -9    0.58    0.19 
   1   6  10    0.09    0.15 
   1   6  10    0.16    0.14 
  -1  -6 -10   -0.08    0.11 
  -1  -6 -10   -0.13    0.10 
   2   5  11    1.49    0.26 
   2   5  11    0.94    0.21 
  -2  -5 -11    1.16    0.18 
  -2  -5 -11    1.20    0.19 
   3   4  12    0.09    0.18 
   3   4  12    0.26    0.16 
   3   4  12    0.31    0.18 
   4   3  13    0.79    0.24 
   4   3  13    0.32    0.18 
   4   3  13    0.67    0.27 
  -2   9   8    0.23    0.24 
  -2   9   8    0.54    0.24 
  -1   8   9    0.93    0.24 
  -1   8   9    1.09    0.27 
   1  -8  -9    0.90    0.24 
   0   7  10   -0.07    0.15 
   0   7  10    0.00    0.15 
   0  -7 -10    0.07    0.14 
   1   6  11    0.02    0.14 
   1   6  11   -0.06    0.14 
  -1  -6 -11    0.13    0.12 
   2   5  12   -0.02    0.14 
   2   5  12    0.12    0.15 
   3   4  13   -0.17    0.17 
   3   4  13    0.15    0.15 
   3   4  13    0.17    0.16 
   4   3  14    1.19    0.28 
   4   3  14    1.16    0.27 
   4   3  14    1.41    0.38 
  -2   9   9    0.74    0.25 
  -2   9   9    0.17    0.23 
  -1   8  10   -0.08    0.18 
  -1   8  10    0.22    0.21 
   0   7  11    0.17    0.17 
   0   7  11    0.24    0.17 
   1   6  12    3.50    0.38 
   1   6  12    3.56    0.39 
   2   5  13    0.64    0.20 
   2   5  13    0.99    0.25 
   3   4  14    0.12    0.21 
   3   4  14    0.27    0.18 
   3   4  14    0.13    0.18 
  -1   8  11    0.10    0.18 
  -1   8  11   -0.14    0.19 
   0   7  12    2.60    0.36 
   0   7  12    2.51    0.35 
   1   6  13    0.82    0.23 
   1   6  13    0.97    0.24 
   2   5  14    0.18    0.18 
   2   5  14    0.14    0.21 
   2   5  14    0.13    0.18 
  -1   8  12    0.01    0.19 
  -1   8  12    0.37    0.22 
   0   7  13    0.60    0.23 
   0   7  13    0.49    0.22 
   1   6  14    0.20    0.20 
   1   6  14    0.42    0.21 
  -6  -2  10    0.12    0.10 
  -5  -3  10    0.13    0.18 
  -6  -2   9    0.98    0.16 
  -6  -2   9    1.27    0.27 
  -7  -1   8    0.19    0.13 
  -7  -1   8   -0.25    0.19 
  -4  -4  10    1.41    0.28 
  -4  -4  10    1.58    0.28 
  -5  -3   9    1.35    0.26 
  -5  -3   9    1.43    0.13 
  -5  -3   9    1.37    0.11 
  -6  -2   8   -0.32    0.15 
  -6  -2   8    0.01    0.08 
  -7  -1   7    1.33    0.31 
  -7  -1   7    0.82    0.18 
  -8   0   6    0.38    0.26 
  -8   0   6    0.14    0.17 
  -3  -5  10    0.34    0.18 
  -4  -4   9    0.70    0.20 
  -4  -4   9    0.46    0.19 
  -5  -3   8    0.67    0.08 
  -5  -3   8    0.59    0.09 
  -5  -3   8    0.36    0.19 
  -6  -2   7    5.71    0.46 
  -6  -2   7    5.22    0.30 
  -7  -1   6   -0.09    0.11 
  -7  -1   6   -0.01    0.19 
  -8   0   5    1.41    0.32 
  -8   0   5    1.76    0.29 
  -2  -6  10    0.12    0.09 
  -2  -6  10   -0.05    0.17 
  -3  -5   9    0.09    0.04 
  -3  -5   9    0.17    0.14 
  -4  -4   8    0.11    0.13 
  -5  -3   7    5.72    0.23 
  -5  -3   7    5.34    0.21 
  -5  -3   7    5.15    0.39 
  -6  -2   6    2.02    0.20 
  -6  -2   6    1.92    0.29 
  -7  -1   5    0.38    0.15 
  -7  -1   5    0.43    0.21 
  -8   0   4    0.22    0.16 
  -8   0   4   -0.04    0.20 
  -9   1   3   -0.20    0.17 
  -2  -6   9    0.39    0.18 
  -2  -6   9    0.61    0.11 
  -3  -5   8    0.12    0.05 
  -3  -5   8    0.01    0.04 
  -3  -5   8    0.14    0.13 
  -4  -4   7    8.73    0.54 
  -5  -3   6    0.83    0.20 
  -5  -3   6    0.91    0.11 
  -5  -3   6    0.98    0.11 
  -5  -3   6    0.94    0.11 
  -6  -2   5    0.30    0.10 
  -6  -2   5    0.36    0.12 
  -6  -2   5    0.13    0.15 
  -7  -1   4    3.24    0.31 
  -7  -1   4    2.79    0.36 
  -8   0   3    1.76    0.28 
  -8   0   3    1.62    0.34 
  -9   1   2    0.23    0.21 
  -1  -7   9    0.13    0.12 
  -2  -6   8    0.04    0.07 
  -2  -6   8    0.04    0.13 
  -3  -5   7    0.28    0.13 
  -3  -5   7    0.21    0.06 
  -3  -5   7    0.11    0.06 
  -3  -5   7    0.09    0.06 
  -4  -4   6    4.03    0.15 
  -4  -4   6    4.20    0.14 
  -4  -4   6    4.13    0.15 
  -5  -3   5    3.84    0.20 
  -5  -3   5    3.58    0.20 
  -5  -3   5    3.70    0.19 
  -5  -3   5    3.36    0.34 
  -6  -2   4    0.30    0.12 
  -6  -2   4    0.18    0.16 
  -6  -2   4    0.30    0.10 
  -6  -2   4    0.31    0.11 
  -7  -1   3    2.14    0.32 
  -7  -1   3    2.37    0.28 
  -8   0   2    0.33    0.23 
  -8   0   2    0.72    0.23 
  -9   1   1    0.46    0.23 
  -1  -7   8    0.17    0.12 
  -2  -6   7    1.29    0.16 
  -2  -6   7    2.00    0.25 
  -2  -6   7    1.60    0.16 
  -3  -5   6    0.70    0.08 
  -3  -5   6    0.87    0.09 
  -3  -5   6    0.78    0.15 
  -3  -5   6    0.71    0.09 
  -4  -4   5    5.66    0.19 
  -4  -4   5    5.56    0.19 
  -4  -4   5    5.70    0.19 
  -5  -3   4   26.91    0.67 
  -5  -3   4   27.51    0.67 
  -5  -3   4   28.04    0.88 
  -5  -3   4   28.96    0.68 
   6   2  -3    0.90    0.11 
  -6  -2   3    1.10    0.16 
  -6  -2   3    1.37    0.18 
  -6  -2   3    0.97    0.15 
  -6  -2   3    1.03    0.24 
   7   1  -2    4.15    0.27 
  -7  -1   2    2.99    0.34 
  -7  -1   2    3.78    0.40 
  -7  -1   2    3.94    0.32 
  -7  -1   2    4.07    0.33 
  -8   0   1   24.48    0.95 
  -8   0   1   23.77    0.89 
  -9   1   0    0.08    0.21 
   0  -8   8   -0.15    0.12 
  -1  -7   7    2.46    0.25 
  -2  -6   6    0.88    0.17 
  -2  -6   6    0.66    0.11 
  -2  -6   6    0.59    0.12 
  -3  -5   5    0.07    0.06 
  -3  -5   5    0.06    0.06 
  -3  -5   5   -0.02    0.05 
  -3  -5   5    0.06    0.08 
  -4  -4   4    0.44    0.07 
  -4  -4   4    0.36    0.07 
  -4  -4   4    0.33    0.07 
  -5  -3   3    7.13    0.30 
  -5  -3   3    7.77    0.29 
  -5  -3   3    6.85    0.29 
  -5  -3   3    7.84    0.42 
   6   2  -2    0.71    0.12 
  -6  -2   2    0.41    0.16 
  -6  -2   2    0.31    0.11 
  -6  -2   2    0.38    0.12 
  -6  -2   2    0.68    0.13 
   7   1  -1   17.38    0.61 
  -7  -1   1   19.18    0.67 
  -7  -1   1   18.75    0.76 
  -7  -1   1   19.11    0.69 
   8   0   0    0.46    0.17 
  -8   0   0    0.41    0.22 
  -8   0   0    0.49    0.21 
  -9   1  -1   -0.18    0.20 
   0  -8   7    0.03    0.12 
  -1  -7   6    0.07    0.10 
  -2  -6   5    1.31    0.15 
  -2  -6   5    1.87    0.21 
  -2  -6   5    1.46    0.16 
  -2  -6   5    1.81    0.17 
  -3  -5   4    0.53    0.08 
  -3  -5   4    0.51    0.11 
  -3  -5   4    0.36    0.08 
  -3  -5   4    0.52    0.08 
  -4  -4   3    0.25    0.07 
  -4  -4   3    0.22    0.06 
  -4  -4   3    0.17    0.06 
   5   3  -2   27.30    0.60 
  -5  -3   2   27.48    0.70 
  -5  -3   2   29.04    0.84 
  -5  -3   2   26.72    0.69 
  -5  -3   2   27.82    0.69 
   6   2  -1    0.01    0.06 
  -6  -2   1    0.07    0.10 
  -6  -2   1    0.01    0.14 
  -6  -2   1    0.11    0.09 
  -6  -2   1    0.11    0.08 
   7   1   0    0.66    0.16 
  -7  -1   0    0.54    0.17 
  -7  -1   0    0.53    0.16 
  -7  -1   0    0.81    0.22 
   8   0   1    0.20    0.16 
  -8   0  -1   -0.15    0.17 
  -8   0  -1   -0.10    0.15 
  -9   1  -2   -0.12    0.19 
   0  -8   6   -0.04    0.12 
  -1  -7   5    0.98    0.17 
  -2  -6   4    0.83    0.12 
  -2  -6   4    0.93    0.14 
  -2  -6   4    0.89    0.14 
  -3  -5   3    7.41    0.26 
  -3  -5   3    7.49    0.26 
  -3  -5   3    7.69    0.27 
  -3  -5   3    7.75    0.27 
  -4  -4   2   23.02    0.56 
  -4  -4   2   23.47    0.57 
  -4  -4   2   23.49    0.58 
   5   3  -1    0.33    0.08 
   5   3  -1    0.33    0.09 
  -5  -3   1    0.42    0.10 
  -5  -3   1    0.27    0.09 
  -5  -3   1    0.38    0.13 
  -5  -3   1    0.52    0.11 
   6   2   0    1.81    0.19 
  -6  -2   0    1.56    0.18 
  -6  -2   0    2.01    0.22 
  -6  -2   0    1.90    0.24 
  -6  -2   0    2.16    0.24 
   7   1   1   18.50    0.66 
  -7  -1  -1   18.87    0.73 
  -7  -1  -1   18.80    0.68 
  -7  -1  -1   20.10    0.73 
   8   0   2    3.18    0.34 
  -8   0  -2    3.25    0.38 
  -9   1  -3   -0.34    0.19 
   1  -9   6    0.18    0.17 
   0  -8   5    0.34    0.15 
   1   7  -4    0.56    0.08 
  -1  -7   4    0.67    0.15 
  -1  -7   4    0.50    0.14 
  -1  -7   4    0.46    0.14 
  -2  -6   3    0.93    0.13 
  -2  -6   3    0.88    0.13 
  -2  -6   3    1.01    0.14 
  -3  -5   2    2.72    0.16 
  -3  -5   2    2.84    0.17 
  -3  -5   2    2.91    0.17 
  -3  -5   2    2.84    0.13 
   4   4  -1   93.32    1.77 
  -4  -4   1   92.90    1.83 
  -4  -4   1   93.59    1.85 
  -4  -4   1   94.17    1.84 
  -5  -3   0    1.57    0.20 
  -5  -3   0    1.73    0.17 
  -5  -3   0    1.63    0.17 
  -5  -3   0    1.52    0.17 
   6   2   1    4.68    0.29 
  -6  -2  -1    5.20    0.33 
  -6  -2  -1    4.83    0.30 
  -6  -2  -1    4.90    0.31 
  -6  -2  -1    4.69    0.33 
   7   1   2   39.44    1.09 
  -7  -1  -2   38.99    1.13 
  -7  -1  -2   38.66    1.11 
   8   0   3    4.87    0.40 
  -8   0  -3    5.38    0.45 
   9  -1   4    2.77    0.37 
  -9   1  -4    3.32    0.46 
   1  -9   5    0.14    0.16 
   0  -8   4    0.09    0.12 
   1   7  -3    0.23    0.10 
   1   7  -3   -0.06    0.05 
  -1  -7   3    0.01    0.10 
  -1  -7   3    0.09    0.11 
  -1  -7   3   -0.16    0.09 
   2   6  -2    0.11    0.06 
   2   6  -2    0.04    0.04 
  -2  -6   2    0.00    0.07 
  -2  -6   2   -0.01    0.07 
  -2  -6   2    0.11    0.08 
   3   5  -1    1.02    0.10 
  -3  -5   1    1.18    0.13 
  -3  -5   1    1.29    0.13 
  -3  -5   1    1.05    0.12 
   4   4   0   38.90    0.85 
   4   4   0   38.97    0.84 
  -4  -4   0   39.02    0.88 
  -4  -4   0   37.73    0.89 
  -4  -4   0   38.41    0.88 
   5   3   1    1.45    0.16 
   5   3   1    1.43    0.16 
  -5  -3  -1    1.75    0.21 
  -5  -3  -1    1.87    0.19 
  -5  -3  -1    1.81    0.18 
  -5  -3  -1    2.15    0.21 
   6   2   2    0.90    0.18 
   6   2   2    0.94    0.17 
  -6  -2  -2    1.00    0.20 
  -6  -2  -2    0.79    0.16 
  -6  -2  -2    0.91    0.17 
  -6  -2  -2    0.87    0.19 
   7   1   3    8.27    0.46 
  -7  -1  -3    8.78    0.48 
  -7  -1  -3    9.00    0.51 
   8   0   4    0.04    0.13 
  -8   0  -4    0.10    0.18 
   9  -1   5    0.13    0.18 
  -9   1  -5    0.10    0.22 
   1  -9   4    0.43    0.18 
   0   8  -3    0.31    0.11 
   0  -8   3    0.47    0.16 
   1   7  -2    0.12    0.09 
   1   7  -2    0.09    0.09 
  -1  -7   2   -0.05    0.10 
  -1  -7   2   -0.08    0.09 
  -1  -7   2   -0.03    0.09 
   2   6  -1   34.86    0.74 
   2   6  -1   33.72    0.78 
   2   6  -1   35.05    0.80 
  -2  -6   1   33.96    0.84 
  -2  -6   1   33.26    0.83 
  -2  -6   1   34.30    0.85 
   3   5   0    1.09    0.12 
   3   5   0    1.19    0.12 
  -3  -5   0    1.01    0.12 
  -3  -5   0    0.80    0.10 
  -3  -5   0    0.74    0.11 
   4   4   1   13.14    0.42 
   4   4   1   13.36    0.41 
   4   4   1   13.50    0.42 
  -4  -4  -1   13.35    0.43 
  -4  -4  -1   14.06    0.44 
  -4  -4  -1   13.14    0.44 
  -4  -4  -1   14.82    0.32 
   5   3   2   63.55    1.40 
   5   3   2   62.75    1.39 
  -5  -3  -2   63.45    1.41 
  -5  -3  -2   64.09    1.41 
  -5  -3  -2   63.16    1.42 
  -5  -3  -2   64.15    1.40 
  -5  -3  -2   63.41    1.32 
   6   2   3  132.58    2.70 
   6   2   3  130.36    2.69 
  -6  -2  -3  129.99    2.65 
  -6  -2  -3  129.40    2.70 
  -6  -2  -3  128.94    2.68 
   7   1   4    2.64    0.30 
  -7  -1  -4    2.09    0.29 
  -7  -1  -4    2.62    0.30 
   8   0   5    0.04    0.14 
  -8   0  -5   -0.21    0.14 
   1  -9   3    0.25    0.17 
   0   8  -2    7.11    0.38 
   0  -8   2    7.67    0.74 
   0  -8   2    7.31    0.42 
   1   7  -1   13.66    0.48 
   1   7  -1   11.33    0.45 
   1   7  -1   15.19    0.46 
  -1  -7   1   14.45    0.53 
  -1  -7   1   14.80    0.53 
  -1  -7   1   14.27    0.52 
   2   6   0    0.46    0.09 
   2   6   0    1.03    0.10 
   2   6   0    0.85    0.12 
  -2  -6   0    0.71    0.12 
  -2  -6   0    0.81    0.13 
  -2  -6   0    0.80    0.13 
   3   5   1  131.22    2.53 
   3   5   1  132.68    2.53 
  -3  -5  -1  133.11    2.57 
  -3  -5  -1  132.32    2.55 
  -3  -5  -1  128.44    2.54 
  -3  -5  -1  129.85    2.55 
   4   4   2   24.80    0.65 
   4   4   2   23.85    0.64 
   4   4   2   24.12    0.64 
  -4  -4  -2   25.03    0.65 
  -4  -4  -2   23.60    0.65 
  -4  -4  -2   24.30    0.53 
  -4  -4  -2   23.92    0.65 
   5   3   3    5.98    0.31 
   5   3   3    5.81    0.31 
  -5  -3  -3    5.41    0.29 
  -5  -3  -3    5.61    0.26 
  -5  -3  -3    5.90    0.30 
  -5  -3  -3    5.68    0.31 
  -5  -3  -3    5.48    0.30 
   6   2   4   25.82    0.81 
   6   2   4   24.52    0.78 
  -6  -2  -4   25.78    0.81 
  -6  -2  -4   25.40    0.74 
   7   1   5    7.95    0.49 
   7   1   5    8.01    0.47 
  -7  -1  -5    7.72    0.48 
   8   0   6    0.05    0.16 
  -8   0  -6    0.11    0.19 
  -1   9  -2   -0.08    0.16 
   1  -9   2    0.02    0.13 
   0   8  -1    1.77    0.23 
   0   8  -1    1.14    0.20 
   0  -8   1    1.42    0.24 
   0  -8   1    1.29    0.24 
   1   7   0    0.22    0.10 
   1   7   0    0.25    0.11 
  -1  -7   0    0.02    0.10 
  -1  -7   0    0.27    0.13 
  -1  -7   0    0.30    0.12 
   2   6   1   15.81    0.50 
   2   6   1   15.18    0.49 
  -2  -6  -1   16.48    0.52 
  -2  -6  -1   15.99    0.51 
  -2  -6  -1   15.76    0.50 
   3   5   2    1.18    0.07 
   3   5   2    1.47    0.16 
   3   5   2    1.32    0.15 
  -3  -5  -2    1.43    0.16 
  -3  -5  -2    1.48    0.17 
  -3  -5  -2    1.20    0.15 
  -3  -5  -2    1.26    0.15 
   4   4   3   -0.05    0.07 
   4   4   3    0.00    0.07 
   4   4   3    0.09    0.09 
  -4  -4  -3    0.07    0.09 
  -4  -4  -3    0.16    0.08 
  -4  -4  -3    0.20    0.09 
   5   3   4    6.39    0.34 
   5   3   4    6.09    0.33 
  -5  -3  -4    6.11    0.32 
  -5  -3  -4    6.08    0.34 
  -5  -3  -4    6.46    0.29 
  -5  -3  -4    6.28    0.29 
   6   2   5   25.81    0.81 
   6   2   5   24.69    0.81 
  -6  -2  -5   24.00    0.79 
  -6  -2  -5   24.69    0.71 
   7   1   6    3.02    0.35 
   7   1   6    3.45    0.35 
  -7  -1  -6    2.78    0.33 
   8   0   7    0.66    0.22 
  -8   0  -7    0.50    0.23 
   2 -10   2    0.14    0.20 
  -1   9  -1    0.12    0.16 
   1  -9   1   -0.15    0.12 
   0   8   0    0.73    0.19 
   0   8   0    0.42    0.16 
   0  -8   0    0.66    0.18 
   0  -8   0    0.33    0.15 
   1   7   1    0.00    0.08 
   1   7   1    0.01    0.09 
  -1  -7  -1   -0.03    0.09 
  -1  -7  -1    0.15    0.10 
  -1  -7  -1    0.09    0.11 
   2   6   2    1.00    0.15 
   2   6   2    1.08    0.15 
  -2  -6  -2    1.05    0.15 
  -2  -6  -2    1.21    0.16 
  -2  -6  -2    1.36    0.17 
   3   5   3   30.18    0.77 
   3   5   3   29.95    0.77 
  -3  -5  -3   29.62    0.76 
  -3  -5  -3   28.82    0.78 
  -3  -5  -3   29.25    0.75 
  -3  -5  -3   29.21    0.76 
   4   4   4    5.12    0.28 
   4   4   4    5.12    0.29 
   4   4   4    5.14    0.23 
  -4  -4  -4    5.60    0.29 
  -4  -4  -4    4.93    0.27 
  -4  -4  -4    5.05    0.29 
   5   3   5    9.31    0.42 
   5   3   5    9.24    0.43 
  -5  -3  -5    8.75    0.36 
  -5  -3  -5    9.89    0.44 
  -5  -3  -5    8.89    0.34 
   6   2   6   32.31    0.99 
   6   2   6   31.57    0.97 
   7   1   7   -0.07    0.16 
   7   1   7   -0.20    0.10 
  -7  -1  -7    0.15    0.16 
   8   0   8    1.78    0.31 
  -8   0  -8    1.30    0.30 
   2 -10   1    0.64    0.24 
  -1   9   0    5.49    0.46 
  -1   9   0    5.51    0.42 
   1  -9   0    5.40    0.42 
   0   8   1    2.22    0.28 
   0   8   1    2.99    0.31 
   0  -8  -1    2.43    0.35 
   0  -8  -1    2.35    0.29 
   1   7   2    3.30    0.27 
   1   7   2    3.27    0.28 
  -1  -7  -2    2.73    0.26 
  -1  -7  -2    3.36    0.26 
   2   6   3    4.27    0.27 
   2   6   3    3.67    0.25 
  -2  -6  -3    4.58    0.27 
  -2  -6  -3    3.61    0.24 
  -2  -6  -3    4.04    0.26 
   3   5   4   12.58    0.45 
   3   5   4   11.94    0.44 
  -3  -5  -4   12.24    0.44 
  -3  -5  -4   12.53    0.45 
  -3  -5  -4   11.97    0.43 
  -3  -5  -4   12.14    0.45 
   4   4   5   11.76    0.40 
   4   4   5   12.94    0.48 
   4   4   5   12.08    0.47 
  -4  -4  -5   12.51    0.48 
  -4  -4  -5   12.41    0.46 
   5   3   6    1.08    0.19 
   5   3   6    1.34    0.20 
   5   3   6    1.01    0.18 
  -5  -3  -6    1.15    0.14 
  -5  -3  -6    1.72    0.23 
   6   2   7   28.11    0.93 
   6   2   7   30.06    0.97 
  -6  -2  -7   30.47    0.94 
   7   1   8    0.13    0.14 
   7   1   8    0.13    0.18 
  -7  -1  -8    0.13    0.16 
   8   0   9    1.95    0.34 
  -8   0  -9    2.01    0.34 
  -2  10   0   -0.20    0.19 
   2 -10   0    0.11    0.17 
  -1   9   1    0.90    0.22 
  -1   9   1    0.31    0.17 
   1  -9  -1    0.85    0.21 
   0   8   2    2.24    0.28 
   0   8   2    2.07    0.28 
   0  -8  -2    1.90    0.25 
   1   7   3    0.83    0.17 
   1   7   3    0.95    0.19 
  -1  -7  -3    1.01    0.18 
  -1  -7  -3    0.88    0.18 
   2   6   4   14.75    0.53 
   2   6   4   14.00    0.52 
  -2  -6  -4   15.84    0.53 
  -2  -6  -4   15.10    0.52 
  -2  -6  -4   14.89    0.54 
   3   5   5    6.76    0.34 
   3   5   5    6.70    0.34 
  -3  -5  -5    6.66    0.35 
  -3  -5  -5    6.68    0.32 
  -3  -5  -5    6.66    0.33 
   4   4   6   11.96    0.43 
   4   4   6   11.82    0.48 
   4   4   6   11.04    0.46 
  -4  -4  -6   11.95    0.48 
   5   3   7   16.99    0.65 
   5   3   7   17.72    0.65 
   5   3   7   17.42    0.62 
  -5  -3  -7   16.82    0.45 
  -5  -3  -7   18.14    0.65 
   6   2   8   55.84    1.50 
   6   2   8   57.02    1.49 
  -6  -2  -8   57.86    1.47 
   7   1   9   -0.12    0.16 
   7   1   9   -0.03    0.14 
  -7  -1  -9    0.17    0.16 
  -2  10   1   -0.06    0.19 
   2 -10  -1   -0.11    0.14 
  -1   9   2    0.13    0.17 
  -1   9   2   -0.07    0.15 
   1  -9  -2    0.06    0.15 
   0   8   3    1.94    0.27 
   0   8   3    2.32    0.30 
   0  -8  -3    2.39    0.28 
   1   7   4    0.00    0.12 
   1   7   4    0.18    0.13 
  -1  -7  -4   -0.16    0.08 
   2   6   5    3.72    0.28 
   2   6   5    3.06    0.25 
  -2  -6  -5    3.42    0.25 
  -2  -6  -5    3.65    0.29 
   3   5   6    0.14    0.11 
   3   5   6   -0.01    0.10 
  -3  -5  -6    0.15    0.10 
  -3  -5  -6    0.19    0.13 
   4   4   7    7.55    0.36 
   4   4   7    7.38    0.39 
  -4  -4  -7    7.74    0.24 
  -4  -4  -7    8.54    0.41 
   5   3   8    2.50    0.29 
   5   3   8    2.26    0.27 
   5   3   8    3.00    0.33 
  -5  -3  -8    2.94    0.30 
   6   2   9   -0.13    0.14 
   6   2   9   -0.02    0.13 
  -6  -2  -9    0.09    0.15 
   7   1  10    0.06    0.16 
   7   1  10    0.10    0.20 
  -7  -1 -10    0.09    0.17 
  -2  10   2    1.57    0.30 
  -2  10   2    1.11    0.29 
   2 -10  -2    1.36    0.27 
  -1   9   3    0.25    0.17 
  -1   9   3    0.29    0.20 
   1  -9  -3    0.34    0.16 
   0   8   4   -0.18    0.13 
   0   8   4    0.17    0.16 
   0  -8  -4    0.11    0.13 
   1   7   5    0.11    0.13 
   1   7   5   -0.04    0.12 
  -1  -7  -5    0.05    0.11 
   2   6   6    0.60    0.15 
   2   6   6    0.37    0.14 
  -2  -6  -6    0.74    0.14 
  -2  -6  -6    0.36    0.15 
   3   5   7    4.74    0.32 
   3   5   7    4.39    0.30 
  -3  -5  -7    4.18    0.31 
  -3  -5  -7    4.73    0.29 
   4   4   8    0.54    0.17 
   4   4   8    0.99    0.19 
   4   4   8    0.61    0.17 
  -4  -4  -8    0.66    0.17 
   5   3   9    2.09    0.29 
   5   3   9    2.37    0.29 
   5   3   9    1.98    0.28 
  -5  -3  -9    1.91    0.25 
   6   2  10    0.39    0.17 
   6   2  10    0.55    0.23 
   6   2  10    0.84    0.25 
  -6  -2 -10    0.70    0.21 
   7   1  11   -0.16    0.19 
   7   1  11    0.05    0.18 
  -2  10   3    0.34    0.22 
  -2  10   3    0.53    0.23 
   2 -10  -3    0.28    0.19 
  -1   9   4    0.12    0.17 
  -1   9   4    0.41    0.21 
   1  -9  -4    0.07    0.15 
   0   8   5    2.35    0.30 
   0   8   5    2.89    0.32 
   0  -8  -5    2.18    0.27 
   1   7   6   22.82    0.77 
   1   7   6   23.28    0.78 
  -1  -7  -6   24.14    0.77 
  -1  -7  -6   22.55    0.77 
   2   6   7    1.66    0.24 
   2   6   7    1.24    0.20 
  -2  -6  -7    1.27    0.19 
  -2  -6  -7    1.46    0.21 
   3   5   8    2.46    0.27 
   3   5   8    2.49    0.27 
  -3  -5  -8    2.61    0.27 
  -3  -5  -8    2.29    0.24 
   4   4   9    5.87    0.39 
   4   4   9    6.51    0.42 
   4   4   9    6.50    0.39 
  -4  -4  -9    6.91    0.37 
  -4  -4  -9    6.45    0.39 
   5   3  10    2.64    0.32 
   5   3  10    2.52    0.33 
   5   3  10    2.93    0.32 
  -5  -3 -10    3.05    0.31 
   6   2  11    1.74    0.30 
   6   2  11    1.11    0.29 
   6   2  11    1.67    0.33 
  -6  -2 -11    1.38    0.26 
  -2  10   4    0.39    0.23 
  -2  10   4    1.33    0.30 
   2 -10  -4    0.94    0.25 
  -1   9   5    0.93    0.26 
  -1   9   5    1.28    0.26 
   1  -9  -5    0.97    0.23 
   0   8   6    3.23    0.35 
   0   8   6    3.42    0.34 
   0  -8  -6    3.60    0.33 
   1   7   7    1.58    0.26 
   1   7   7    1.55    0.26 
  -1  -7  -7    1.58    0.25 
  -1  -7  -7    1.34    0.21 
   2   6   8    0.53    0.16 
   2   6   8    0.36    0.16 
  -2  -6  -8    0.74    0.18 
  -2  -6  -8    0.50    0.15 
   3   5   9   -0.06    0.13 
   3   5   9   -0.02    0.13 
  -3  -5  -9   -0.13    0.12 
  -3  -5  -9    0.10    0.04 
  -3  -5  -9   -0.01    0.10 
   4   4  10    0.06    0.14 
   4   4  10    0.03    0.12 
   4   4  10    0.18    0.15 
  -4  -4 -10    0.15    0.13 
  -4  -4 -10    0.00    0.10 
   5   3  11   14.68    0.67 
   5   3  11   15.05    0.71 
   5   3  11   15.00    0.70 
  -5  -3 -11   15.66    0.63 
   6   2  12    0.43    0.20 
   6   2  12    0.25    0.21 
   6   2  12    0.41    0.27 
  -2  10   5    1.63    0.33 
  -2  10   5    1.50    0.34 
   2 -10  -5    1.37    0.29 
  -1   9   6    0.53    0.23 
  -1   9   6    1.00    0.24 
   1  -9  -6    0.71    0.22 
   0   8   7    0.31    0.18 
   0   8   7    0.33    0.20 
   0  -8  -7    0.40    0.16 
   1   7   8    3.54    0.36 
   1   7   8    4.07    0.37 
  -1  -7  -8    3.86    0.36 
  -1  -7  -8    3.82    0.32 
   2   6   9   12.62    0.57 
   2   6   9   12.42    0.56 
  -2  -6  -9   11.32    0.49 
  -2  -6  -9   12.54    0.54 
  -2  -6  -9   11.39    0.39 
   3   5  10    2.13    0.28 
   3   5  10    2.48    0.31 
   3   5  10    2.18    0.27 
  -3  -5 -10    2.17    0.25 
  -3  -5 -10    2.44    0.26 
   4   4  11    0.33    0.16 
   4   4  11    0.24    0.18 
   4   4  11    0.36    0.19 
  -4  -4 -11    0.78    0.18 
  -4  -4 -11    0.70    0.16 
   5   3  12    2.24    0.31 
   5   3  12    2.68    0.40 
   5   3  12    3.64    0.41 
   6   2  13    2.83    0.41 
   6   2  13    2.33    0.35 
   6   2  13    2.34    0.42 
  -2  10   6    0.08    0.22 
  -2  10   6    0.01    0.19 
   2 -10  -6    0.06    0.18 
  -1   9   7    0.17    0.17 
  -1   9   7    0.25    0.20 
   1  -9  -7    0.10    0.15 
   0   8   8    1.72    0.30 
   0   8   8    2.54    0.33 
   0  -8  -8    2.17    0.28 
   0  -8  -8    1.63    0.27 
   1   7   9    0.10    0.16 
   1   7   9    0.31    0.17 
  -1  -7  -9    0.19    0.14 
  -1  -7  -9    0.26    0.16 
   2   6  10    0.33    0.16 
   2   6  10    0.09    0.15 
  -2  -6 -10    0.08    0.11 
  -2  -6 -10    0.20    0.14 
   3   5  11    1.41    0.25 
   3   5  11    0.95    0.22 
   3   5  11    1.36    0.26 
  -3  -5 -11    1.64    0.23 
  -3  -5 -11    1.39    0.21 
   4   4  12    0.48    0.23 
   4   4  12    0.12    0.17 
   4   4  12    0.34    0.19 
   5   3  13    2.28    0.34 
   5   3  13    1.17    0.31 
   5   3  13    1.59    0.29 
  -2  10   7   -0.12    0.21 
  -2  10   7    0.38    0.26 
  -1   9   8    0.57    0.22 
  -1   9   8    0.40    0.23 
   1  -9  -8    0.68    0.21 
   0   8   9    0.65    0.23 
   0   8   9    0.60    0.22 
   0  -8  -9    0.51    0.20 
   0  -8  -9    0.83    0.20 
   1   7  10    0.01    0.16 
   1   7  10   -0.20    0.14 
  -1  -7 -10   -0.05    0.12 
  -1  -7 -10    0.19    0.15 
   2   6  11    6.87    0.45 
   2   6  11    6.02    0.45 
  -2  -6 -11    6.63    0.41 
  -2  -6 -11    6.61    0.40 
   3   5  12    0.05    0.15 
   3   5  12   -0.01    0.16 
   3   5  12    0.06    0.15 
   4   4  13    1.80    0.29 
   4   4  13    1.50    0.28 
   4   4  13    1.64    0.32 
   5   3  14    2.25    0.37 
   5   3  14    1.71    0.38 
   5   3  14    2.15    0.36 
  -2  10   8    1.28    0.32 
  -2  10   8    1.12    0.31 
  -1   9   9    0.00    0.18 
  -1   9   9    0.15    0.22 
   1  -9  -9    0.09    0.20 
   0   8  10    0.79    0.25 
   0   8  10    0.77    0.23 
   0  -8 -10    0.93    0.24 
   1   7  11    0.52    0.20 
   1   7  11   -0.04    0.15 
  -1  -7 -11    0.22    0.16 
   2   6  12    0.17    0.17 
   2   6  12    0.61    0.19 
   3   5  13    1.86    0.31 
   3   5  13    1.53    0.29 
   3   5  13    1.52    0.33 
   4   4  14    0.98    0.32 
   4   4  14    0.50    0.23 
   4   4  14    1.04    0.25 
  -1   9  10    1.01    0.28 
  -1   9  10    0.74    0.27 
   0   8  11    2.17    0.34 
   0   8  11    1.78    0.32 
   1   7  12    0.63    0.22 
   1   7  12    0.87    0.23 
   2   6  13    0.40    0.20 
   2   6  13    0.01    0.17 
   3   5  14    0.28    0.24 
   3   5  14   -0.06    0.15 
   3   5  14   -0.18    0.15 
  -1   9  11    1.15    0.33 
  -1   9  11    1.04    0.30 
   0   8  12   -0.10    0.19 
   0   8  12    0.09    0.20 
   1   7  13    0.60    0.24 
   1   7  13    0.25    0.19 
   2   6  14    0.20    0.19 
   2   6  14   -0.01    0.16 
  -5  -4  10    4.09    0.46 
  -5  -4  10    3.62    0.39 
  -6  -3   9    0.72    0.25 
  -6  -3   9    0.59    0.12 
  -7  -2   8    0.60    0.24 
  -7  -2   8    0.52    0.15 
  -8  -1   7    0.86    0.30 
  -8  -1   7    0.67    0.20 
  -4  -5  10   -0.11    0.13 
  -5  -4   9    0.66    0.22 
  -6  -3   8   -0.13    0.15 
  -6  -3   8   -0.08    0.07 
  -7  -2   7    2.70    0.27 
  -7  -2   7    2.61    0.39 
  -8  -1   6    0.31    0.26 
  -8  -1   6    0.31    0.17 
  -3  -6  10    1.02    0.25 
  -3  -6  10    1.37    0.11 
  -4  -5   9    1.52    0.25 
  -5  -4   8    1.58    0.10 
  -5  -4   8    1.56    0.28 
  -6  -3   7    1.37    0.28 
  -6  -3   7    1.28    0.16 
  -7  -2   6    5.39    0.34 
  -7  -2   6    6.09    0.49 
  -8  -1   5    4.52    0.50 
  -8  -1   5    5.09    0.40 
  -9   0   4    0.78    0.25 
  -9   0   4    0.88    0.30 
  -3  -6   9    1.23    0.11 
  -3  -6   9    1.53    0.25 
  -4  -5   8    0.51    0.16 
  -5  -4   7    3.24    0.15 
  -5  -4   7    3.60    0.39 
  -5  -4   7    3.17    0.14 
  -6  -3   6    0.35    0.11 
  -6  -3   6    0.26    0.09 
  -6  -3   6    0.35    0.19 
  -7  -2   5    6.05    0.48 
  -7  -2   5    6.34    0.37 
  -8  -1   4    1.78    0.29 
  -8  -1   4    1.59    0.34 
  -9   0   3   -0.02    0.21 
  -9   0   3    0.48    0.22 
  -2  -7   9    1.17    0.17 
  -3  -6   8    0.35    0.08 
  -3  -6   8    0.44    0.15 
  -4  -5   7    1.30    0.19 
  -4  -5   7    1.05    0.09 
  -4  -5   7    1.26    0.08 
  -4  -5   7    1.03    0.07 
  -5  -4   6    8.90    0.28 
  -5  -4   6    8.80    0.27 
  -5  -4   6    8.76    0.28 
  -6  -3   5    2.74    0.20 
  -6  -3   5    2.37    0.21 
  -6  -3   5    2.16    0.30 
  -7  -2   4    3.35    0.28 
  -7  -2   4    2.47    0.34 
  -8  -1   3   12.82    0.60 
  -8  -1   3   10.18    0.62 
  -9   0   2    1.99    0.39 
  -9   0   2    1.12    0.28 
  -2  -7   8    0.43    0.12 
  -3  -6   7    0.42    0.14 
  -3  -6   7    0.34    0.08 
  -3  -6   7    0.31    0.08 
  -4  -5   6   17.04    0.40 
  -4  -5   6   16.67    0.40 
  -4  -5   6   17.49    0.56 
  -4  -5   6   16.64    0.41 
  -4  -5   6   17.50    0.41 
  -5  -4   5    0.73    0.09 
  -5  -4   5    0.88    0.11 
  -5  -4   5    0.74    0.11 
  -6  -3   4    0.12    0.07 
  -6  -3   4    0.15    0.16 
  -6  -3   4    0.05    0.09 
  -6  -3   4    0.08    0.08 
  -7  -2   3    1.30    0.20 
  -7  -2   3    0.71    0.21 
  -8  -1   2    0.15    0.21 
  -8  -1   2    0.36    0.19 
  -9   0   1    0.00    0.23 
  -9   0   1   -0.07    0.17 
  -1  -8   8    0.35    0.14 
  -2  -7   7   -0.04    0.08 
  -3  -6   6    1.93    0.16 
  -3  -6   6    2.28    0.17 
  -3  -6   6    2.68    0.25 
  -4  -5   5    2.41    0.15 
  -4  -5   5    2.21    0.14 
  -4  -5   5    2.22    0.21 
  -4  -5   5    2.37    0.14 
  -4  -5   5    2.20    0.13 
  -5  -4   4    6.15    0.25 
  -5  -4   4    6.10    0.24 
  -5  -4   4    6.10    0.25 
   6   3  -3    0.18    0.04 
  -6  -3   3    0.14    0.10 
  -6  -3   3    0.17    0.09 
  -6  -3   3    0.13    0.09 
  -6  -3   3    0.07    0.14 
   7   2  -2    0.20    0.10 
  -7  -2   2   -0.03    0.10 
  -7  -2   2    0.18    0.11 
  -7  -2   2    0.09    0.12 
  -7  -2   2    0.11    0.18 
  -8  -1   1    1.20    0.30 
  -8  -1   1    0.97    0.22 
  -9   0   0    0.19    0.23 
  -9   0   0    0.18    0.20 
  -1  -8   7    0.75    0.18 
  -2  -7   6   -0.10    0.08 
  -3  -6   5    3.42    0.19 
  -3  -6   5    3.37    0.20 
  -3  -6   5    3.51    0.24 
  -3  -6   5    3.60    0.20 
  -4  -5   4    1.73    0.14 
  -4  -5   4    1.75    0.15 
  -4  -5   4    1.53    0.13 
  -4  -5   4    1.80    0.16 
  -5  -4   3    5.13    0.23 
  -5  -4   3    4.99    0.24 
  -5  -4   3    5.07    0.24 
   6   3  -2    0.45    0.09 
  -6  -3   2    0.38    0.12 
  -6  -3   2    0.43    0.12 
  -6  -3   2    0.27    0.16 
  -6  -3   2    0.46    0.11 
  -7  -2   1    0.67    0.17 
  -7  -2   1    0.47    0.13 
  -7  -2   1    0.63    0.20 
  -7  -2   1    0.64    0.17 
   8   1   0    0.23    0.14 
  -8  -1   0    0.32    0.17 
  -8  -1   0    0.50    0.24 
  -9   0  -1   -0.12    0.16 
  -1  -8   6    1.02    0.19 
  -2  -7   5    0.88    0.15 
  -2  -7   5    1.63    0.19 
  -3  -6   4    0.07    0.07 
  -3  -6   4    0.11    0.08 
  -3  -6   4    0.02    0.07 
  -3  -6   4    0.04    0.08 
  -4  -5   3    0.11    0.07 
  -4  -5   3    0.05    0.06 
  -4  -5   3    0.04    0.06 
  -4  -5   3    0.06    0.06 
   5   4  -2   44.92    0.86 
  -5  -4   2   47.14    1.03 
  -5  -4   2   44.92    1.01 
  -5  -4   2   45.59    1.02 
   6   3  -1    7.00    0.30 
  -6  -3   1    6.43    0.32 
  -6  -3   1    7.26    0.35 
  -6  -3   1    7.05    0.34 
  -6  -3   1    6.12    0.39 
   7   2   0    1.77    0.22 
  -7  -2   0    1.78    0.24 
  -7  -2   0    1.80    0.29 
  -7  -2   0    1.91    0.23 
   8   1   1    2.75    0.31 
  -8  -1  -1    2.76    0.36 
  -8  -1  -1    2.40    0.32 
  -9   0  -2   -0.24    0.17 
   0  -9   6    0.07    0.15 
  -1  -8   5    0.68    0.17 
  -2  -7   4    1.87    0.20 
  -2  -7   4    1.60    0.18 
  -2  -7   4    1.67    0.20 
  -3  -6   3    1.09    0.13 
  -3  -6   3    1.22    0.14 
  -3  -6   3    1.30    0.14 
  -4  -5   2   21.14    0.54 
  -4  -5   2   21.62    0.55 
  -4  -5   2   20.24    0.55 
  -4  -5   2   19.97    0.46 
   5   4  -1    0.23    0.07 
  -5  -4   1    0.68    0.12 
  -5  -4   1    0.20    0.08 
  -5  -4   1    0.19    0.08 
  -6  -3   0    0.63    0.15 
  -6  -3   0    0.63    0.14 
  -6  -3   0    0.66    0.13 
  -6  -3   0    0.54    0.18 
   7   2   1   36.54    1.00 
  -7  -2  -1   35.39    1.01 
  -7  -2  -1   37.00    1.07 
  -7  -2  -1   36.80    1.05 
   8   1   2    0.89    0.20 
  -8  -1  -2    0.98    0.25 
  -8  -1  -2    1.41    0.27 
   9   0   3    0.42    0.19 
  -9   0  -3   -0.06    0.18 
   0  -9   5    0.87    0.22 
  -1  -8   4    1.62    0.23 
   2   7  -3   17.07    0.38 
   2   7  -3   17.18    0.44 
  -2  -7   3   16.39    0.55 
  -2  -7   3   16.88    0.56 
  -2  -7   3   17.57    0.56 
   3   6  -2    0.59    0.07 
  -3  -6   2    0.47    0.10 
  -3  -6   2    0.43    0.10 
  -3  -6   2    0.41    0.10 
   4   5  -1   10.55    0.30 
   4   5  -1   10.96    0.29 
  -4  -5   1   10.39    0.36 
  -4  -5   1   11.33    0.37 
  -4  -5   1   10.65    0.37 
   5   4   0    4.97    0.24 
   5   4   0    5.35    0.24 
  -5  -4   0    5.60    0.27 
  -5  -4   0    4.82    0.26 
  -5  -4   0    5.29    0.28 
   6   3   1    4.62    0.28 
  -6  -3  -1    4.19    0.29 
  -6  -3  -1    4.10    0.28 
  -6  -3  -1    3.95    0.27 
  -6  -3  -1    4.68    0.32 
   7   2   2   13.78    0.56 
  -7  -2  -2   13.20    0.58 
  -7  -2  -2   13.90    0.56 
  -7  -2  -2   15.21    0.62 
   8   1   3    4.57    0.41 
  -8  -1  -3    4.96    0.45 
  -8  -1  -3    5.26    0.48 
   9   0   4    1.95    0.31 
  -9   0  -4    1.80    0.35 
   0  -9   4    0.15    0.14 
   1   8  -3    6.54    0.30 
  -1  -8   3    6.85    0.39 
   2   7  -2    5.77    0.25 
   2   7  -2    5.68    0.26 
  -2  -7   2    5.54    0.31 
  -2  -7   2    6.08    0.32 
  -2  -7   2    6.55    0.33 
   3   6  -1    4.15    0.20 
  -3  -6   1    4.27    0.23 
  -3  -6   1    4.13    0.24 
  -3  -6   1    3.77    0.23 
   4   5   0   57.52    1.18 
   4   5   0   55.87    1.16 
  -4  -5   0   56.32    1.22 
  -4  -5   0   55.19    1.21 
  -4  -5   0   55.84    1.23 
   5   4   1   23.93    0.64 
   5   4   1   22.92    0.63 
  -5  -4  -1   22.80    0.54 
  -5  -4  -1   23.25    0.65 
  -5  -4  -1   23.14    0.66 
  -5  -4  -1   23.49    0.65 
   6   3   2   26.23    0.76 
   6   3   2   26.54    0.76 
  -6  -3  -2   25.22    0.75 
  -6  -3  -2   24.97    0.69 
  -6  -3  -2   27.39    0.80 
  -6  -3  -2   25.98    0.78 
  -6  -3  -2   27.17    0.78 
   7   2   3    9.26    0.47 
  -7  -2  -3    8.25    0.48 
  -7  -2  -3    8.21    0.46 
   8   1   4    3.13    0.34 
  -8  -1  -4    3.44    0.40 
   9   0   5    1.10    0.25 
  -9   0  -5    1.30    0.30 
   1 -10   4    0.18    0.17 
   0  -9   3    2.14    0.28 
   1   8  -2    1.53    0.21 
   1   8  -2    0.94    0.16 
  -1  -8   2    1.25    0.20 
  -1  -8   2    0.77    0.17 
  -1  -8   2    1.66    0.24 
   2   7  -1    5.69    0.27 
   2   7  -1    5.23    0.23 
   2   7  -1    6.03    0.28 
  -2  -7   1    5.78    0.32 
  -2  -7   1    5.72    0.32 
  -2  -7   1    5.31    0.30 
   3   6   0   11.96    0.39 
   3   6   0   11.94    0.38 
  -3  -6   0   11.82    0.41 
  -3  -6   0   11.46    0.41 
  -3  -6   0   11.55    0.40 
   4   5   1    9.55    0.33 
   4   5   1    7.00    0.31 
  -4  -5  -1    9.41    0.35 
  -4  -5  -1    9.19    0.36 
  -4  -5  -1    8.80    0.34 
   5   4   2    3.55    0.23 
   5   4   2    3.22    0.23 
  -5  -4  -2    3.01    0.24 
  -5  -4  -2    3.24    0.23 
  -5  -4  -2    3.39    0.23 
  -5  -4  -2    3.09    0.16 
   6   3   3    1.17    0.18 
   6   3   3    1.06    0.18 
  -6  -3  -3    1.21    0.19 
  -6  -3  -3    0.75    0.18 
  -6  -3  -3    0.90    0.15 
  -6  -3  -3    0.98    0.18 
   7   2   4   84.55    1.98 
   7   2   4   84.23    1.96 
  -7  -2  -4   84.53    1.98 
  -7  -2  -4   86.23    1.91 
   8   1   5    5.14    0.41 
  -8  -1  -5    3.82    0.41 
   9   0   6    2.02    0.34 
  -9   0  -6    2.58    0.41 
   1 -10   3    1.88    0.31 
   0   9  -2   -0.02    0.18 
   0  -9   2   -0.07    0.12 
   1   8  -1    5.37    0.31 
   1   8  -1    5.41    0.29 
   1   8  -1    4.73    0.30 
  -1  -8   1    4.82    0.35 
  -1  -8   1    4.59    0.33 
  -1  -8   1    5.04    0.35 
   2   7   0    5.84    0.23 
   2   7   0    5.70    0.29 
   2   7   0    6.41    0.30 
  -2  -7   0    5.41    0.32 
  -2  -7   0    5.80    0.32 
  -2  -7   0    6.06    0.32 
   3   6   1    1.33    0.15 
   3   6   1    1.29    0.15 
  -3  -6  -1    1.41    0.16 
  -3  -6  -1    1.36    0.16 
  -3  -6  -1    1.33    0.16 
   4   5   2    7.85    0.33 
   4   5   2    8.01    0.33 
  -4  -5  -2    7.90    0.35 
  -4  -5  -2    8.04    0.34 
  -4  -5  -2    8.10    0.34 
   5   4   3    9.38    0.39 
   5   4   3    8.69    0.38 
  -5  -4  -3    8.53    0.39 
  -5  -4  -3    8.54    0.30 
  -5  -4  -3    8.66    0.38 
  -5  -4  -3    8.16    0.36 
   6   3   4    1.17    0.20 
   6   3   4    1.13    0.19 
  -6  -3  -4    0.95    0.19 
  -6  -3  -4    0.69    0.16 
  -6  -3  -4    0.97    0.16 
   7   2   5    0.24    0.18 
   7   2   5    0.32    0.16 
  -7  -2  -5   -0.04    0.15 
  -7  -2  -5    0.08    0.15 
   8   1   6    0.07    0.16 
  -8  -1  -6   -0.04    0.17 
   9   0   7    2.69    0.40 
  -9   0  -7    2.42    0.39 
   1 -10   2    0.14    0.17 
   0   9  -1    3.64    0.42 
   0   9  -1    3.02    0.32 
   0  -9   1    3.18    0.34 
   1   8   0    1.97    0.21 
   1   8   0    2.25    0.25 
   1   8   0    2.18    0.24 
  -1  -8   0    2.01    0.25 
  -1  -8   0    1.75    0.23 
   2   7   1    1.11    0.16 
   2   7   1    0.92    0.15 
  -2  -7  -1    0.85    0.16 
  -2  -7  -1    1.37    0.18 
  -2  -7  -1    1.09    0.17 
   3   6   2    4.60    0.26 
   3   6   2    4.73    0.27 
  -3  -6  -2    4.12    0.26 
  -3  -6  -2    5.46    0.30 
  -3  -6  -2    5.20    0.27 
  -3  -6  -2    4.95    0.28 
   4   5   3    3.84    0.16 
   4   5   3    3.79    0.25 
   4   5   3    3.82    0.24 
  -4  -5  -3    4.16    0.27 
  -4  -5  -3    3.68    0.24 
  -4  -5  -3    3.22    0.22 
   5   4   4    5.79    0.33 
   5   4   4    5.58    0.33 
  -5  -4  -4    6.25    0.32 
  -5  -4  -4    5.96    0.34 
  -5  -4  -4    6.11    0.26 
   6   3   5    0.19    0.13 
   6   3   5    0.07    0.11 
  -6  -3  -5    0.23    0.14 
  -6  -3  -5    0.37    0.13 
   7   2   6    0.34    0.15 
   7   2   6    0.26    0.17 
  -7  -2  -6    0.43    0.19 
   8   1   7    0.52    0.20 
  -8  -1  -7    0.73    0.23 
   1 -10   1    0.24    0.18 
   0   9   0    0.24    0.16 
   0   9   0   -0.01    0.14 
   0  -9   0    0.15    0.15 
   1   8   1    0.89    0.18 
   1   8   1    1.32    0.21 
  -1  -8  -1    1.66    0.24 
  -1  -8  -1    1.52    0.22 
   2   7   2    1.89    0.21 
   2   7   2    1.67    0.20 
  -2  -7  -2    1.18    0.18 
  -2  -7  -2    1.33    0.18 
  -2  -7  -2    1.59    0.19 
   3   6   3    0.97    0.15 
   3   6   3    1.16    0.16 
  -3  -6  -3    0.95    0.15 
  -3  -6  -3    0.83    0.15 
  -3  -6  -3    0.91    0.14 
  -3  -6  -3    0.93    0.14 
   4   5   4    7.38    0.36 
   4   5   4    6.92    0.26 
   4   5   4    7.45    0.36 
  -4  -5  -4    7.39    0.35 
  -4  -5  -4    7.42    0.34 
   5   4   5    1.70    0.22 
   5   4   5    2.08    0.24 
   5   4   5    2.11    0.20 
  -5  -4  -5    2.24    0.18 
  -5  -4  -5    1.89    0.22 
   6   3   6    2.67    0.29 
   6   3   6    2.23    0.28 
  -6  -3  -6    2.35    0.28 
  -6  -3  -6    2.37    0.21 
   7   2   7    0.12    0.16 
   7   2   7    0.25    0.18 
  -7  -2  -7    0.26    0.17 
   8   1   8    0.37    0.22 
   8   1   8    0.26    0.17 
  -8  -1  -8    0.59    0.23 
  -1  10   0    1.36    0.27 
   1 -10   0    1.83    0.30 
   0   9   1    2.82    0.31 
   0   9   1    3.02    0.33 
   0  -9  -1    2.36    0.29 
   1   8   2    0.21    0.15 
   1   8   2    0.20    0.13 
  -1  -8  -2    0.32    0.15 
  -1  -8  -2    0.28    0.13 
   2   7   3   10.74    0.45 
   2   7   3   10.32    0.45 
  -2  -7  -3   10.00    0.43 
  -2  -7  -3   10.32    0.44 
   3   6   4   29.17    0.83 
   3   6   4   30.68    0.83 
  -3  -6  -4   30.35    0.82 
  -3  -6  -4   29.75    0.82 
  -3  -6  -4   31.41    0.92 
  -3  -6  -4   30.23    0.84 
   4   5   5   16.77    0.57 
   4   5   5   15.95    0.47 
   4   5   5   16.93    0.58 
  -4  -5  -5   16.07    0.55 
  -4  -5  -5   16.41    0.57 
   5   4   6    0.01    0.10 
   5   4   6    0.16    0.12 
   5   4   6   -0.03    0.10 
  -5  -4  -6    0.11    0.08 
  -5  -4  -6    0.22    0.14 
   6   3   7    3.54    0.36 
   6   3   7    3.77    0.36 
  -6  -3  -7    4.56    0.36 
  -6  -3  -7    4.16    0.24 
   7   2   8    3.08    0.35 
   7   2   8    3.40    0.38 
  -7  -2  -8    4.43    0.42 
   8   1   9   -0.16    0.18 
   8   1   9    0.19    0.18 
  -8  -1  -9    0.04    0.19 
  -1  10   1    0.09    0.18 
   1 -10  -1    0.09    0.17 
   0   9   2   23.53    0.84 
   0   9   2   24.19    0.83 
   0  -9  -2   24.67    0.85 
   1   8   3    0.63    0.19 
   1   8   3    1.08    0.20 
  -1  -8  -3    1.00    0.20 
   2   7   4    0.65    0.17 
   2   7   4    0.32    0.14 
  -2  -7  -4    0.49    0.14 
  -2  -7  -4    0.53    0.15 
   3   6   5    5.29    0.32 
   3   6   5    5.04    0.32 
  -3  -6  -5    4.98    0.32 
  -3  -6  -5    4.78    0.29 
  -3  -6  -5    4.75    0.29 
   4   5   6    1.09    0.18 
   4   5   6    1.70    0.18 
   4   5   6    1.46    0.21 
  -4  -5  -6    1.35    0.20 
   5   4   7    1.66    0.23 
   5   4   7    1.55    0.23 
   5   4   7    1.86    0.24 
  -5  -4  -7    1.75    0.15 
  -5  -4  -7    2.29    0.27 
   6   3   8   16.71    0.66 
   6   3   8   16.96    0.71 
   6   3   8   16.70    0.69 
  -6  -3  -8   17.90    0.69 
   7   2   9    0.53    0.22 
   7   2   9    0.33    0.18 
  -7  -2  -9    0.54    0.21 
   8   1  10    0.31    0.27 
   8   1  10    0.62    0.22 
  -8  -1 -10    0.73    0.31 
  -1  10   2    1.85    0.33 
  -1  10   2    2.17    0.33 
   1 -10  -2    1.83    0.30 
   0   9   3    0.51    0.19 
   0   9   3    0.22    0.16 
   0  -9  -3    0.75    0.19 
   1   8   4    1.36    0.23 
   1   8   4    0.56    0.17 
  -1  -8  -4    1.31    0.22 
   2   7   5   31.46    0.91 
   2   7   5   32.60    0.92 
  -2  -7  -5   30.54    0.88 
  -2  -7  -5   31.47    0.92 
   3   6   6    0.38    0.14 
   3   6   6    0.65    0.16 
  -3  -6  -6    0.35    0.15 
  -3  -6  -6    0.28    0.12 
   4   5   7    4.74    0.34 
   4   5   7    4.87    0.29 
   4   5   7    4.68    0.32 
  -4  -5  -7    4.66    0.33 
  -4  -5  -7    4.74    0.31 
   5   4   8    1.68    0.24 
   5   4   8    1.86    0.26 
   5   4   8    2.45    0.28 
  -5  -4  -8    1.71    0.25 
  -5  -4  -8    1.99    0.13 
   6   3   9    1.02    0.23 
   6   3   9    1.58    0.28 
   6   3   9    1.39    0.27 
  -6  -3  -9    2.60    0.32 
   7   2  10    0.35    0.21 
   7   2  10    0.21    0.17 
  -7  -2 -10    0.09    0.17 
  -1  10   3   -0.04    0.19 
  -1  10   3    0.24    0.20 
   1 -10  -3    0.11    0.16 
   0   9   4    8.20    0.49 
   0   9   4    8.29    0.51 
   0  -9  -4    7.86    0.47 
   1   8   5    3.91    0.35 
   1   8   5    4.22    0.38 
  -1  -8  -5    4.12    0.32 
   2   7   6    2.96    0.29 
   2   7   6    3.11    0.30 
  -2  -7  -6    3.05    0.30 
  -2  -7  -6    2.93    0.27 
   3   6   7    1.78    0.23 
   3   6   7    2.27    0.26 
  -3  -6  -7    1.60    0.23 
  -3  -6  -7    1.96    0.22 
   4   5   8    3.57    0.28 
   4   5   8    3.71    0.33 
   4   5   8    3.90    0.36 
  -4  -5  -8    4.01    0.30 
  -4  -5  -8    3.25    0.31 
   5   4   9   11.21    0.55 
   5   4   9    9.91    0.51 
   5   4   9   10.86    0.53 
  -5  -4  -9   10.30    0.51 
   6   3  10    3.60    0.40 
   6   3  10    3.44    0.37 
   6   3  10    4.01    0.42 
  -6  -3 -10    4.12    0.39 
   7   2  11    0.46    0.21 
   7   2  11    0.48    0.25 
  -1  10   4    2.18    0.35 
  -1  10   4    3.48    0.41 
   1 -10  -4    3.18    0.37 
   0   9   5    0.37    0.18 
   0   9   5    0.30    0.18 
   0  -9  -5    0.19    0.15 
   1   8   6    0.22    0.17 
   1   8   6    0.14    0.17 
  -1  -8  -6   -0.04    0.12 
   2   7   7    7.02    0.42 
   2   7   7    6.79    0.43 
  -2  -7  -7    6.72    0.38 
  -2  -7  -7    7.12    0.43 
   3   6   8    0.19    0.14 
   3   6   8    0.64    0.17 
  -3  -6  -8    0.62    0.16 
  -3  -6  -8    0.42    0.16 
   4   5   9    3.00    0.33 
   4   5   9    3.01    0.32 
   4   5   9    2.77    0.31 
  -4  -5  -9    3.53    0.34 
  -4  -5  -9    3.56    0.29 
   5   4  10    0.53    0.19 
   5   4  10    0.77    0.21 
   5   4  10    0.90    0.21 
  -5  -4 -10    0.53    0.17 
   6   3  11    5.55    0.44 
   6   3  11    5.19    0.50 
   6   3  11    4.82    0.46 
  -6  -3 -11    5.31    0.42 
   7   2  12    3.94    0.49 
   7   2  12    3.40    0.42 
  -1  10   5    0.51    0.24 
  -1  10   5    0.24    0.20 
   1 -10  -5    0.30    0.17 
   0   9   6    0.65    0.22 
   0   9   6    0.97    0.23 
   0  -9  -6    0.68    0.20 
   1   8   7   14.12    0.64 
   1   8   7   12.65    0.59 
  -1  -8  -7   13.30    0.58 
  -1  -8  -7   12.82    0.61 
   2   7   8   12.64    0.59 
   2   7   8   12.37    0.58 
  -2  -7  -8   12.49    0.54 
  -2  -7  -8   12.02    0.56 
   3   6   9   15.53    0.63 
   3   6   9   15.82    0.65 
  -3  -6  -9   15.39    0.61 
  -3  -6  -9   15.01    0.59 
   4   5  10    0.95    0.21 
   4   5  10    1.13    0.23 
   4   5  10    1.29    0.26 
  -4  -5 -10    1.06    0.19 
  -4  -5 -10    0.94    0.20 
   5   4  11    2.91    0.36 
   5   4  11    2.65    0.34 
   5   4  11    2.08    0.31 
  -5  -4 -11    2.40    0.30 
  -5  -4 -11    3.14    0.31 
   6   3  12    0.62    0.28 
   6   3  12    0.56    0.22 
   6   3  12    0.40    0.22 
  -1  10   6    0.83    0.26 
  -1  10   6    0.87    0.25 
   1 -10  -6    1.00    0.23 
   0   9   7    0.00    0.16 
   0   9   7    0.29    0.20 
   0  -9  -7    0.22    0.16 
   1   8   8    0.22    0.18 
   1   8   8    0.18    0.17 
  -1  -8  -8    0.15    0.18 
  -1  -8  -8    0.03    0.12 
   2   7   9    1.72    0.28 
   2   7   9    1.40    0.24 
  -2  -7  -9    2.33    0.27 
  -2  -7  -9    2.10    0.29 
   3   6  10    0.10    0.17 
   3   6  10    0.31    0.16 
  -3  -6 -10    0.16    0.14 
  -3  -6 -10    0.38    0.16 
   4   5  11    1.07    0.24 
   4   5  11    0.60    0.20 
   4   5  11    0.62    0.20 
  -4  -5 -11    1.28    0.23 
  -4  -5 -11    0.70    0.17 
   5   4  12    3.01    0.38 
   5   4  12    2.92    0.37 
   5   4  12    3.00    0.37 
   6   3  13    0.25    0.21 
   6   3  13    0.26    0.25 
   6   3  13    0.16    0.19 
  -1  10   7    0.08    0.20 
  -1  10   7   -0.21    0.17 
   1 -10  -7    0.28    0.18 
   0   9   8    0.14    0.18 
   0   9   8   -0.08    0.17 
   0  -9  -8    0.23    0.16 
   0  -9  -8   -0.01    0.18 
   1   8   9    1.45    0.27 
   1   8   9    0.94    0.25 
  -1  -8  -9    0.41    0.19 
  -1  -8  -9    1.06    0.22 
   2   7  10    9.73    0.53 
   2   7  10    9.43    0.55 
  -2  -7 -10    9.73    0.49 
  -2  -7 -10    9.98    0.51 
   3   6  11    8.08    0.48 
   3   6  11    7.88    0.50 
  -3  -6 -11    6.32    0.41 
  -3  -6 -11    6.79    0.41 
   4   5  12    0.01    0.15 
   4   5  12    0.11    0.18 
   4   5  12   -0.12    0.15 
  -4  -5 -12    0.07    0.13 
   5   4  13    1.21    0.28 
   5   4  13    1.41    0.32 
   5   4  13    1.41    0.29 
  -1  10   8    1.29    0.32 
  -1  10   8    0.84    0.30 
   0   9   9    1.11    0.27 
   0   9   9    1.20    0.28 
   0  -9  -9    1.19    0.29 
   0  -9  -9    1.35    0.25 
   1   8  10    0.27    0.20 
   1   8  10    0.44    0.19 
  -1  -8 -10    0.17    0.17 
  -1  -8 -10    0.19    0.15 
   2   7  11    3.10    0.37 
   2   7  11    2.45    0.35 
  -2  -7 -11    2.57    0.31 
   3   6  12    0.65    0.21 
   3   6  12    0.63    0.22 
   3   6  12    1.06    0.26 
  -3  -6 -12    0.89    0.22 
   4   5  13    3.45    0.41 
   4   5  13    2.80    0.38 
   4   5  13    2.76    0.36 
   5   4  14    1.64    0.32 
   5   4  14    1.04    0.32 
   5   4  14    1.28    0.30 
  -1  10   9    1.50    0.33 
  -1  10   9    1.98    0.37 
   1 -10  -9    1.06    0.32 
   0   9  10    1.10    0.28 
   0   9  10    0.30    0.23 
   0  -9 -10    0.74    0.24 
   1   8  11    1.64    0.31 
   1   8  11    1.49    0.29 
  -1  -8 -11    1.06    0.24 
   2   7  12    1.15    0.28 
   2   7  12    1.41    0.29 
   3   6  13    0.16    0.20 
   3   6  13    0.17    0.18 
   3   6  13    0.15    0.17 
   4   5  14    0.09    0.20 
   4   5  14    0.11    0.19 
   4   5  14    0.37    0.24 
   0   9  11    0.48    0.25 
   0   9  11    1.15    0.29 
   1   8  12    0.42    0.21 
   1   8  12    0.06    0.18 
   2   7  13    0.09    0.19 
   2   7  13    0.29    0.21 
   3   6  14    0.20    0.19 
   3   6  14    0.35    0.22 
   3   6  14    0.33    0.23 
   0   9  12    0.63    0.28 
   0   9  12    0.58    0.27 
   1   8  13    1.57    0.33 
   1   8  13    1.13    0.28 
   2   7  14    0.06    0.21 
   2   7  14   -0.12    0.17 
  -6  -4   9    2.54    0.37 
  -7  -3   8    0.26    0.22 
  -7  -3   8    0.36    0.12 
  -8  -2   7    0.59    0.27 
  -8  -2   7   -0.01    0.13 
  -5  -5   9    0.12    0.17 
  -5  -5   9    0.12    0.13 
  -6  -4   8    0.45    0.10 
  -6  -4   8    0.69    0.23 
  -7  -3   7    2.06    0.35 
  -7  -3   7    1.26    0.18 
  -8  -2   6    0.55    0.17 
  -8  -2   6    0.10    0.21 
  -4  -6   9    0.08    0.14 
  -5  -5   8    0.37    0.16 
  -6  -4   7    1.65    0.29 
  -6  -4   7    2.05    0.16 
  -7  -3   6    0.00    0.10 
  -7  -3   6    0.00    0.15 
  -8  -2   5    0.18    0.14 
  -8  -2   5   -0.30    0.17 
  -9  -1   4    0.30    0.19 
  -9  -1   4   -0.11    0.22 
  -3  -7   9    0.50    0.11 
  -4  -6   8    0.07    0.04 
  -4  -6   8    0.27    0.14 
  -5  -5   7    0.26    0.06 
  -5  -5   7    0.28    0.05 
  -5  -5   7    0.45    0.14 
  -5  -5   7    0.22    0.06 
  -6  -4   6    6.35    0.28 
  -6  -4   6    6.25    0.27 
  -6  -4   6    5.88    0.46 
  -7  -3   5    0.25    0.18 
  -7  -3   5    0.57    0.14 
  -8  -2   4   -0.01    0.18 
  -8  -2   4   -0.23    0.11 
  -9  -1   3    2.14    0.33 
  -9  -1   3    2.00    0.38 
  -3  -7   8    0.35    0.10 
  -3  -7   8    0.22    0.16 
  -4  -6   7    0.24    0.13 
  -4  -6   7    0.11    0.06 
  -4  -6   7    0.17    0.06 
  -5  -5   6    4.10    0.18 
  -5  -5   6    4.31    0.28 
  -5  -5   6    4.23    0.19 
  -6  -4   5    2.38    0.31 
  -6  -4   5    2.58    0.20 
  -6  -4   5    2.77    0.19 
  -7  -3   4   -0.07    0.09 
  -7  -3   4   -0.19    0.15 
  -8  -2   3   16.01    0.65 
  -8  -2   3   15.11    0.73 
  -9  -1   2    2.43    0.36 
  -9  -1   2    1.85    0.35 
  -2  -8   8    0.11    0.12 
  -3  -7   7    0.03    0.08 
  -3  -7   7    0.00    0.13 
  -4  -6   6    3.11    0.24 
  -4  -6   6    2.87    0.17 
  -4  -6   6    2.57    0.16 
  -5  -5   5    1.60    0.13 
  -5  -5   5    1.52    0.14 
  -5  -5   5    1.57    0.14 
  -6  -4   4    5.77    0.29 
  -6  -4   4    5.83    0.42 
  -6  -4   4    6.27    0.30 
  -6  -4   4    6.28    0.28 
   7   3  -3    0.98    0.11 
  -7  -3   3    1.23    0.25 
  -7  -3   3    0.77    0.17 
  -8  -2   2    8.47    0.48 
  -8  -2   2    8.24    0.54 
  -9  -1   1    0.15    0.21 
  -9  -1   1    0.14    0.18 
  -2  -8   7    2.00    0.23 
  -3  -7   6    0.19    0.09 
  -4  -6   5    2.80    0.20 
  -4  -6   5    2.29    0.16 
  -4  -6   5    2.39    0.17 
  -4  -6   5    2.56    0.17 
  -5  -5   4    0.76    0.12 
  -5  -5   4    0.59    0.10 
  -5  -5   4    0.62    0.10 
  -6  -4   3    0.40    0.11 
  -6  -4   3    0.40    0.12 
  -6  -4   3    0.51    0.11 
  -6  -4   3    0.38    0.17 
   7   3  -2    0.60    0.12 
  -7  -3   2    0.57    0.16 
  -7  -3   2    0.36    0.11 
  -7  -3   2    0.27    0.19 
  -7  -3   2    0.69    0.20 
  -8  -2   1   18.87    0.73 
  -8  -2   1   18.99    0.80 
  -9  -1   0    0.94    0.24 
  -9  -1   0    1.09    0.31 
  -1  -9   7    0.26    0.15 
  -2  -8   6   -0.09    0.09 
  -3  -7   5    0.29    0.10 
  -3  -7   5    0.60    0.12 
  -4  -6   4    2.10    0.17 
  -4  -6   4    1.65    0.15 
  -4  -6   4    1.91    0.16 
  -4  -6   4    2.04    0.17 
  -5  -5   3    0.26    0.08 
  -5  -5   3    0.18    0.08 
  -5  -5   3    0.00    0.08 
   6   4  -2    0.13    0.06 
  -6  -4   2    0.26    0.09 
  -6  -4   2    0.24    0.10 
  -6  -4   2    0.33    0.16 
  -6  -4   2    0.11    0.09 
   7   3  -1    1.52    0.18 
  -7  -3   1    1.88    0.22 
  -7  -3   1    1.93    0.30 
  -7  -3   1    1.56    0.22 
  -7  -3   1    1.64    0.22 
   8   2   0    7.82    0.42 
  -8  -2   0    7.21    0.50 
  -8  -2   0    8.24    0.48 
  -9  -1  -1    0.27    0.24 
  -9  -1  -1    0.42    0.21 
  -1  -9   6    0.59    0.19 
  -2  -8   5    2.06    0.23 
  -3  -7   4    1.82    0.19 
  -3  -7   4    1.68    0.18 
  -3  -7   4    1.58    0.18 
  -4  -6   3    0.37    0.10 
  -4  -6   3    0.50    0.10 
  -4  -6   3    0.37    0.09 
  -4  -6   3    0.48    0.08 
  -5  -5   2    1.35    0.15 
  -5  -5   2    1.29    0.14 
  -5  -5   2    1.53    0.16 
   6   4  -1    2.93    0.19 
  -6  -4   1    2.86    0.25 
  -6  -4   1    2.59    0.30 
  -6  -4   1    2.81    0.22 
  -6  -4   1    2.82    0.23 
   7   3   0    4.06    0.27 
  -7  -3   0    3.91    0.29 
  -7  -3   0    4.21    0.36 
  -7  -3   0    4.62    0.33 
  -7  -3   0    4.39    0.32 
   8   2   1   -0.02    0.11 
  -8  -2  -1   -0.03    0.16 
  -8  -2  -1   -0.08    0.14 
  -9  -1  -2    0.29    0.20 
  -9  -1  -2   -0.27    0.18 
  -1  -9   5    0.12    0.14 
  -2  -8   4    0.46    0.14 
  -3  -7   3    0.42    0.11 
  -3  -7   3    0.18    0.10 
  -3  -7   3    0.63    0.12 
  -4  -6   2    0.19    0.10 
  -4  -6   2    0.00    0.07 
  -4  -6   2    0.04    0.07 
  -4  -6   2   -0.01    0.06 
   5   5  -1    2.98    0.16 
  -5  -5   1    2.93    0.21 
  -5  -5   1    2.86    0.22 
  -5  -5   1    2.88    0.20 
   6   4   0   11.78    0.41 
  -6  -4   0   11.93    0.45 
  -6  -4   0   11.92    0.46 
  -6  -4   0   10.94    0.49 
  -6  -4   0   11.14    0.43 
   7   3   1    5.17    0.33 
  -7  -3  -1    5.24    0.34 
  -7  -3  -1    4.70    0.36 
  -7  -3  -1    5.54    0.36 
   8   2   2    2.55    0.29 
  -8  -2  -2    2.60    0.34 
  -8  -2  -2    3.10    0.36 
   9   1   3   -0.18    0.13 
  -9  -1  -3    0.47    0.22 
   0 -10   5    0.67    0.22 
  -1  -9   4    1.51    0.24 
  -2  -8   3    0.04    0.13 
  -2  -8   3    0.01    0.10 
   3   7  -2    1.60    0.10 
   3   7  -2    1.76    0.14 
  -3  -7   2    1.24    0.16 
  -3  -7   2    1.42    0.18 
  -3  -7   2    1.87    0.20 
   4   6  -1    8.23    0.27 
   4   6  -1    8.55    0.26 
  -4  -6   1    9.01    0.34 
  -4  -6   1    8.24    0.34 
  -4  -6   1    8.63    0.36 
  -4  -6   1    8.68    0.34 
   5   5   0    2.64    0.17 
   5   5   0    2.85    0.19 
  -5  -5   0    2.82    0.22 
  -5  -5   0    2.50    0.20 
  -5  -5   0    2.71    0.11 
  -5  -5   0    2.81    0.20 
   6   4   1    0.01    0.09 
   6   4   1    0.05    0.09 
  -6  -4  -1    0.11    0.11 
  -6  -4  -1    0.15    0.14 
  -6  -4  -1    0.21    0.11 
  -6  -4  -1    0.26    0.09 
  -6  -4  -1    0.08    0.09 
   7   3   2    6.37    0.37 
  -7  -3  -2    5.76    0.36 
  -7  -3  -2    6.15    0.40 
  -7  -3  -2    5.62    0.39 
   8   2   3   18.15    0.71 
  -8  -2  -3   18.48    0.73 
  -8  -2  -3   19.26    0.77 
   9   1   4    1.22    0.26 
  -9  -1  -4    0.93    0.27 
   0 -10   4   -0.08    0.13 
  -1  -9   3    0.45    0.17 
   2   8  -2   10.49    0.37 
   2   8  -2   10.43    0.38 
  -2  -8   2   11.28    0.48 
  -2  -8   2   11.19    0.48 
  -2  -8   2   10.47    0.46 
   3   7  -1    0.81    0.12 
   3   7  -1    0.90    0.12 
  -3  -7   1    0.84    0.14 
  -3  -7   1    0.64    0.13 
  -3  -7   1    0.87    0.15 
   4   6   0    4.78    0.22 
   4   6   0    4.80    0.24 
  -4  -6   0    4.73    0.28 
  -4  -6   0    4.78    0.26 
  -4  -6   0    4.71    0.26 
   5   5   1    5.20    0.26 
  -5  -5  -1    5.20    0.15 
  -5  -5  -1    5.03    0.28 
  -5  -5  -1    5.30    0.28 
  -5  -5  -1    5.25    0.30 
   6   4   2    1.61    0.19 
   6   4   2    2.25    0.23 
  -6  -4  -2    1.62    0.16 
  -6  -4  -2    1.94    0.22 
  -6  -4  -2    2.05    0.25 
  -6  -4  -2    1.33    0.20 
  -6  -4  -2    2.26    0.24 
   7   3   3    1.45    0.23 
   7   3   3    1.44    0.21 
  -7  -3  -3    1.92    0.28 
  -7  -3  -3    1.62    0.26 
   8   2   4   16.35    0.69 
  -8  -2  -4   17.49    0.73 
  -8  -2  -4   15.57    0.66 
   9   1   5   -0.06    0.14 
  -9  -1  -5    0.46    0.22 
   0 -10   3   -0.01    0.13 
  -1  -9   2    2.60    0.29 
   2   8  -1   12.75    0.45 
   2   8  -1   11.25    0.43 
   2   8  -1   11.92    0.39 
  -2  -8   1   11.59    0.50 
  -2  -8   1   11.77    0.50 
  -2  -8   1   12.18    0.50 
   3   7   0    8.93    0.34 
   3   7   0    8.90    0.35 
  -3  -7   0    9.48    0.40 
  -3  -7   0    8.66    0.38 
  -3  -7   0    8.72    0.39 
   4   6   1   26.56    0.68 
  -4  -6  -1   26.28    0.71 
  -4  -6  -1   25.78    0.73 
  -4  -6  -1   25.43    0.71 
   5   5   2   16.62    0.54 
   5   5   2   16.45    0.53 
  -5  -5  -2   17.29    0.55 
  -5  -5  -2   15.88    0.54 
   6   4   3    1.35    0.19 
   6   4   3    1.88    0.23 
  -6  -4  -3    1.51    0.20 
  -6  -4  -3    1.37    0.16 
  -6  -4  -3    1.02    0.19 
  -6  -4  -3    1.42    0.21 
   7   3   4   15.13    0.61 
   7   3   4   15.50    0.63 
  -7  -3  -4   15.24    0.63 
  -7  -3  -4   14.15    0.58 
   8   2   5    1.40    0.25 
   8   2   5    1.83    0.30 
  -8  -2  -5    1.61    0.26 
  -8  -2  -5    1.33    0.28 
   9   1   6    0.21    0.18 
  -9  -1  -6    0.19    0.21 
   0 -10   2    0.16    0.16 
   1   9  -1    4.22    0.33 
   1   9  -1    5.07    0.32 
  -1  -9   1    5.31    0.37 
   2   8   0    2.22    0.21 
   2   8   0    2.78    0.24 
   2   8   0    2.35    0.17 
  -2  -8   0    1.69    0.22 
  -2  -8   0    2.52    0.27 
  -2  -8   0    2.16    0.24 
   3   7   1    1.18    0.07 
   3   7   1    1.42    0.17 
   3   7   1    1.44    0.18 
  -3  -7  -1    1.20    0.17 
  -3  -7  -1    1.08    0.17 
  -3  -7  -1    1.25    0.19 
   4   6   2    0.14    0.08 
   4   6   2    0.02    0.09 
  -4  -6  -2    0.13    0.10 
  -4  -6  -2    0.12    0.11 
  -4  -6  -2   -0.02    0.08 
   5   5   3    0.37    0.11 
   5   5   3    0.43    0.12 
  -5  -5  -3    0.24    0.12 
  -5  -5  -3    0.60    0.13 
  -5  -5  -3    0.45    0.13 
   6   4   4    1.44    0.21 
   6   4   4    1.10    0.19 
  -6  -4  -4    1.34    0.17 
  -6  -4  -4    1.59    0.21 
  -6  -4  -4    1.29    0.22 
  -6  -4  -4    1.22    0.19 
   7   3   5    2.81    0.32 
   7   3   5    2.23    0.28 
  -7  -3  -5    2.76    0.29 
  -7  -3  -5    2.77    0.31 
   8   2   6    0.43    0.22 
   8   2   6    0.35    0.17 
  -8  -2  -6    0.02    0.18 
   9   1   7    0.29    0.19 
  -9  -1  -7    0.26    0.22 
   0 -10   1    0.06    0.14 
   1   9   0    7.49    0.40 
   1   9   0    6.70    0.40 
  -1  -9   0    7.52    0.44 
   2   8   1   13.88    0.51 
   2   8   1   13.15    0.51 
  -2  -8  -1   13.07    0.53 
  -2  -8  -1   14.19    0.63 
  -2  -8  -1   13.11    0.53 
   3   7   2    5.38    0.30 
   3   7   2    5.29    0.31 
  -3  -7  -2    5.27    0.31 
  -3  -7  -2    5.22    0.30 
   4   6   3   41.71    0.82 
   4   6   3   42.16    1.03 
   4   6   3   41.76    1.03 
  -4  -6  -3   40.07    1.02 
  -4  -6  -3   41.55    1.05 
  -4  -6  -3   41.81    1.04 
  -4  -6  -3   40.89    1.02 
   5   5   4   19.14    0.63 
   5   5   4   19.24    0.63 
  -5  -5  -4   19.53    0.63 
  -5  -5  -4   19.07    0.65 
   6   4   5    0.32    0.15 
   6   4   5    0.49    0.16 
  -6  -4  -5    0.39    0.12 
  -6  -4  -5    0.76    0.15 
  -6  -4  -5    0.62    0.19 
   7   3   6    8.20    0.47 
   7   3   6    7.94    0.48 
  -7  -3  -6    8.48    0.49 
  -7  -3  -6    8.14    0.40 
   8   2   7    0.79    0.21 
   8   2   7    0.24    0.20 
  -8  -2  -7    1.03    0.26 
   9   1   8    0.26    0.20 
  -9  -1  -8    0.47    0.26 
   1 -11   1   -0.07    0.17 
   0  10   0    0.16    0.17 
   0 -10   0    0.14    0.15 
   1   9   1    4.65    0.34 
   1   9   1    4.75    0.35 
  -1  -9  -1    4.46    0.35 
  -1  -9  -1    4.30    0.38 
   2   8   2    0.98    0.19 
   2   8   2    0.86    0.18 
  -2  -8  -2    0.99    0.20 
  -2  -8  -2    1.00    0.19 
   3   7   3   25.72    0.76 
   3   7   3   26.50    0.76 
  -3  -7  -3   25.98    0.79 
  -3  -7  -3   26.58    0.79 
  -3  -7  -3   26.15    0.76 
  -3  -7  -3   25.96    0.77 
   4   6   4    2.16    0.14 
   4   6   4    2.54    0.25 
   4   6   4    1.78    0.21 
  -4  -6  -4    1.93    0.23 
  -4  -6  -4    2.34    0.23 
  -4  -6  -4    2.08    0.22 
   5   5   5    1.51    0.22 
   5   5   5    1.15    0.19 
   5   5   5    1.26    0.16 
  -5  -5  -5    1.27    0.20 
  -5  -5  -5    1.40    0.22 
   6   4   6    0.45    0.16 
   6   4   6    0.23    0.13 
  -6  -4  -6   -0.09    0.14 
  -6  -4  -6    0.24    0.11 
   7   3   7    0.93    0.22 
   7   3   7    0.89    0.23 
  -7  -3  -7    1.02    0.23 
  -7  -3  -7    0.89    0.17 
   8   2   8   -0.14    0.13 
   8   2   8    0.01    0.19 
  -8  -2  -8    0.30    0.19 
   1 -11   0    0.07    0.19 
   0  10   1    0.37    0.23 
   0  10   1    0.87    0.22 
   0 -10  -1    0.45    0.20 
   1   9   2   14.23    0.60 
   1   9   2   13.47    0.58 
  -1  -9  -2   13.88    0.60 
   2   8   3    3.94    0.32 
   2   8   3    3.71    0.31 
  -2  -8  -3    4.03    0.32 
  -2  -8  -3    3.95    0.31 
   3   7   4    0.07    0.11 
   3   7   4    0.29    0.13 
  -3  -7  -4    0.01    0.09 
  -3  -7  -4   -0.09    0.12 
  -3  -7  -4   -0.06    0.09 
   4   6   5   13.49    0.41 
   4   6   5   13.24    0.53 
   4   6   5   13.73    0.52 
  -4  -6  -5   13.29    0.50 
  -4  -6  -5   13.10    0.51 
  -4  -6  -5   13.93    0.54 
   5   5   6    2.39    0.26 
   5   5   6    1.73    0.23 
   5   5   6    1.68    0.19 
  -5  -5  -6    1.89    0.24 
   6   4   7   -0.26    0.11 
   6   4   7   -0.02    0.14 
   6   4   7   -0.01    0.14 
  -6  -4  -7    0.00    0.14 
  -6  -4  -7    0.02    0.09 
   7   3   8    0.48    0.20 
   7   3   8    0.37    0.20 
  -7  -3  -8    0.09    0.16 
   8   2   9    0.67    0.23 
   8   2   9    0.40    0.23 
  -8  -2  -9    0.68    0.24 
   1 -11  -1    0.21    0.19 
   0  10   2    0.35    0.18 
   0  10   2    1.04    0.23 
   0 -10  -2    0.25    0.16 
   1   9   3    5.43    0.39 
   1   9   3    5.70    0.41 
  -1  -9  -3    5.52    0.39 
   2   8   4    0.34    0.15 
   2   8   4    0.53    0.17 
  -2  -8  -4    0.47    0.15 
   3   7   5    8.97    0.44 
   3   7   5    8.89    0.44 
  -3  -7  -5    9.05    0.42 
  -3  -7  -5    8.82    0.45 
   4   6   6   16.33    0.60 
   4   6   6   16.78    0.51 
   4   6   6   16.59    0.61 
  -4  -6  -6   16.52    0.59 
  -4  -6  -6   15.62    0.61 
   5   5   7    0.18    0.14 
   5   5   7   -0.02    0.11 
   5   5   7   -0.14    0.10 
  -5  -5  -7    0.07    0.13 
   6   4   8    0.78    0.21 
   6   4   8    0.85    0.21 
   6   4   8    0.87    0.21 
  -6  -4  -8    1.29    0.24 
  -6  -4  -8    1.05    0.13 
   7   3   9    1.30    0.25 
   7   3   9    1.09    0.27 
  -7  -3  -9    1.25    0.26 
   8   2  10   -0.10    0.21 
   8   2  10    0.02    0.15 
  -8  -2 -10    0.02    0.18 
  -1  11   2    0.01    0.21 
   1 -11  -2    0.40    0.20 
   0  10   3    6.92    0.48 
   0  10   3    7.56    0.51 
   0 -10  -3    6.49    0.47 
   1   9   4    5.16    0.40 
   1   9   4    4.37    0.39 
  -1  -9  -4    4.26    0.35 
   2   8   5    0.11    0.14 
   2   8   5    0.31    0.14 
  -2  -8  -5    0.12    0.13 
   3   7   6   -0.05    0.11 
   3   7   6    0.07    0.13 
  -3  -7  -6   -0.02    0.14 
  -3  -7  -6    0.08    0.11 
   4   6   7    4.17    0.33 
   4   6   7    4.54    0.35 
   4   6   7    3.98    0.27 
  -4  -6  -7    4.16    0.34 
  -4  -6  -7    3.88    0.29 
   5   5   8    4.58    0.37 
   5   5   8    4.09    0.33 
   5   5   8    4.36    0.32 
  -5  -5  -8    4.36    0.20 
  -5  -5  -8    4.80    0.36 
   6   4   9    0.51    0.20 
   6   4   9    0.57    0.19 
   6   4   9    0.40    0.17 
  -6  -4  -9    0.25    0.17 
   7   3  10    1.27    0.28 
   7   3  10    1.69    0.29 
  -7  -3 -10    0.95    0.24 
   8   2  11    0.30    0.25 
   8   2  11   -0.06    0.18 
  -1  11   3    0.10    0.22 
   1 -11  -3   -0.11    0.15 
   0  10   4   -0.03    0.17 
   0  10   4    0.02    0.17 
   0 -10  -4    0.07    0.15 
   1   9   5    4.06    0.38 
   1   9   5    4.75    0.40 
  -1  -9  -5    5.09    0.38 
   2   8   6    8.31    0.47 
   2   8   6    8.02    0.46 
  -2  -8  -6    7.05    0.41 
  -2  -8  -6    7.42    0.47 
   3   7   7    0.79    0.20 
   3   7   7    0.82    0.20 
  -3  -7  -7    0.78    0.20 
  -3  -7  -7    0.80    0.17 
   4   6   8    1.85    0.26 
   4   6   8    2.09    0.25 
   4   6   8    1.82    0.26 
  -4  -6  -8    1.87    0.26 
  -4  -6  -8    1.97    0.24 
   5   5   9    0.24    0.17 
   5   5   9    0.15    0.14 
   5   5   9    0.06    0.15 
  -5  -5  -9    0.06    0.14 
  -5  -5  -9    0.05    0.04 
   6   4  10    0.90    0.24 
   6   4  10    1.08    0.25 
   6   4  10    1.27    0.25 
  -6  -4 -10    0.97    0.24 
   7   3  11    0.06    0.15 
   7   3  11    0.06    0.19 
  -7  -3 -11   -0.14    0.16 
  -1  11   4    0.01    0.19 
  -1  11   4    0.07    0.21 
   1 -11  -4    0.34    0.18 
   0  10   5    2.25    0.34 
   0  10   5    2.19    0.33 
   0 -10  -5    2.50    0.33 
   1   9   6    2.22    0.31 
   1   9   6    3.48    0.37 
  -1  -9  -6    2.87    0.32 
   2   8   7    6.92    0.43 
   2   8   7    6.45    0.45 
  -2  -8  -7    7.16    0.47 
  -2  -8  -7    6.68    0.42 
   3   7   8   19.78    0.74 
   3   7   8   20.48    0.75 
  -3  -7  -8   18.56    0.71 
  -3  -7  -8   18.72    0.68 
   4   6   9    2.60    0.31 
   4   6   9    2.74    0.31 
   4   6   9    2.16    0.27 
  -4  -6  -9    2.16    0.26 
  -4  -6  -9    2.74    0.32 
   5   5  10    0.70    0.19 
   5   5  10    0.72    0.23 
   5   5  10    0.39    0.17 
  -5  -5 -10    0.22    0.14 
  -5  -5 -10    0.15    0.16 
   6   4  11   -0.02    0.17 
   6   4  11    0.58    0.22 
   6   4  11    0.08    0.18 
  -6  -4 -11    0.39    0.19 
   7   3  12    1.28    0.29 
   7   3  12    1.66    0.34 
  -1  11   5    0.06    0.18 
  -1  11   5    0.11    0.23 
   1 -11  -5   -0.01    0.17 
   0  10   6    0.60    0.24 
   0  10   6    0.14    0.19 
   0 -10  -6    0.21    0.16 
   1   9   7    0.19    0.18 
   1   9   7    0.12    0.18 
  -1  -9  -7   -0.07    0.13 
  -1  -9  -7   -0.04    0.17 
   2   8   8    0.34    0.17 
   2   8   8    0.26    0.17 
  -2  -8  -8    0.38    0.19 
  -2  -8  -8    0.64    0.19 
   3   7   9   20.58    0.77 
   3   7   9   18.75    0.74 
  -3  -7  -9   19.72    0.73 
  -3  -7  -9   18.90    0.70 
   4   6  10    5.06    0.42 
   4   6  10    4.89    0.38 
   4   6  10    5.30    0.40 
  -4  -6 -10    5.14    0.35 
  -4  -6 -10    5.39    0.39 
   5   5  11    0.71    0.21 
   5   5  11    1.00    0.24 
   5   5  11    0.73    0.23 
  -5  -5 -11    0.77    0.21 
  -5  -5 -11    0.86    0.20 
   6   4  12   -0.05    0.18 
   6   4  12    0.58    0.24 
   6   4  12    0.26    0.22 
  -1  11   6   -0.01    0.22 
  -1  11   6    0.12    0.23 
   1 -11  -6    0.16    0.18 
   0  10   7    1.20    0.29 
   0  10   7    1.02    0.27 
   0 -10  -7    1.16    0.24 
   1   9   8    0.47    0.20 
   1   9   8    0.36    0.20 
  -1  -9  -8    0.82    0.25 
  -1  -9  -8    0.64    0.20 
   2   8   9    4.95    0.40 
   2   8   9    4.93    0.42 
  -2  -8  -9    5.03    0.37 
  -2  -8  -9    4.66    0.39 
   3   7  10   22.85    0.84 
   3   7  10   23.24    0.87 
  -3  -7 -10   24.74    0.84 
  -3  -7 -10   23.08    0.79 
   4   6  11    0.16    0.16 
   4   6  11    0.22    0.18 
   4   6  11    0.32    0.19 
  -4  -6 -11   -0.01    0.13 
  -4  -6 -11   -0.06    0.12 
   5   5  12    3.20    0.38 
   5   5  12    4.22    0.43 
   5   5  12    3.46    0.40 
  -5  -5 -12    4.52    0.41 
   6   4  13    4.01    0.50 
   6   4  13    3.22    0.43 
   6   4  13    4.42    0.49 
  -1  11   7    1.17    0.33 
  -1  11   7    0.85    0.29 
   1 -11  -7    0.70    0.33 
   0  10   8   -0.02    0.21 
   0  10   8   -0.03    0.17 
   0 -10  -8    0.19    0.15 
   0 -10  -8   -0.29    0.16 
   1   9   9    0.64    0.24 
   1   9   9    0.44    0.22 
  -1  -9  -9    0.40    0.20 
  -1  -9  -9    0.45    0.17 
   2   8  10    0.16    0.17 
   2   8  10    0.07    0.16 
  -2  -8 -10    0.33    0.16 
  -2  -8 -10    0.70    0.22 
   3   7  11    0.21    0.17 
   3   7  11    0.11    0.18 
  -3  -7 -11    0.23    0.16 
  -3  -7 -11    0.33    0.18 
   4   6  12    0.45    0.21 
   4   6  12    0.27    0.18 
   4   6  12    0.45    0.20 
  -4  -6 -12    0.62    0.20 
   5   5  13    0.46    0.22 
   5   5  13    0.11    0.20 
   5   5  13    0.35    0.21 
   0  10   9    0.18    0.23 
   0  10   9    0.63    0.26 
   0 -10  -9    0.37    0.25 
   1   9  10   -0.01    0.19 
   1   9  10    0.18    0.19 
  -1  -9 -10    0.16    0.20 
   2   8  11    1.93    0.32 
   2   8  11    1.39    0.28 
  -2  -8 -11    1.47    0.27 
   3   7  12    1.57    0.30 
   3   7  12    1.20    0.25 
  -3  -7 -12    1.53    0.26 
   4   6  13   -0.03    0.19 
   4   6  13    0.00    0.18 
   4   6  13   -0.12    0.16 
   5   5  14    0.25    0.21 
   5   5  14    0.07    0.24 
   5   5  14    0.19    0.21 
   0  10  10    0.24    0.24 
   0  10  10    0.21    0.22 
   0 -10 -10    0.20    0.22 
   1   9  11    2.33    0.38 
   1   9  11    2.20    0.36 
  -1  -9 -11    2.94    0.38 
   2   8  12    2.66    0.40 
   2   8  12    3.04    0.40 
   3   7  13    0.78    0.24 
   3   7  13    0.89    0.27 
   4   6  14   -0.03    0.17 
   4   6  14    0.31    0.22 
   4   6  14    0.03    0.24 
   1   9  12   -0.05    0.22 
   1   9  12    0.03    0.20 
   2   8  13    3.29    0.44 
   2   8  13    2.83    0.41 
   3   7  14    0.49    0.27 
   3   7  14    0.14    0.19 
   3   7  14    0.35    0.23 
  -7  -4   8   -0.08    0.09 
  -7  -4   8   -0.23    0.17 
  -8  -3   7    0.09    0.13 
  -8  -3   7    0.73    0.27 
  -6  -5   8    5.23    0.56 
  -6  -5   8    5.63    0.47 
  -7  -4   7    0.17    0.10 
  -7  -4   7    0.11    0.18 
  -8  -3   6    4.94    0.35 
  -8  -3   6    4.41    0.50 
  -9  -2   5    2.04    0.31 
  -9  -2   5    1.66    0.37 
  -6  -5   7    0.05    0.07 
  -6  -5   7    0.37    0.21 
  -7  -4   6    0.55    0.24 
  -7  -4   6    0.49    0.13 
  -8  -3   5   -0.02    0.17 
  -8  -3   5    0.00    0.12 
  -9  -2   4    2.55    0.43 
  -9  -2   4    3.26    0.38 
  -4  -7   8   -0.06    0.06 
  -5  -6   7    0.34    0.06 
  -5  -6   7    0.38    0.08 
  -5  -6   7    0.30    0.07 
  -5  -6   7    0.29    0.12 
  -6  -5   6   -0.08    0.15 
  -6  -5   6    0.05    0.07 
  -7  -4   5    0.12    0.10 
  -7  -4   5    0.11    0.17 
  -8  -3   4    0.99    0.28 
  -8  -3   4    1.61    0.23 
  -9  -2   3    0.01    0.21 
  -9  -2   3    0.08    0.16 
  -3  -8   8    0.17    0.11 
  -4  -7   7   -0.02    0.06 
  -4  -7   7    0.16    0.13 
  -5  -6   6    0.48    0.12 
  -5  -6   6    0.19    0.08 
  -5  -6   6    0.50    0.09 
  -5  -6   6    0.46    0.08 
  -6  -5   5    5.81    0.27 
  -6  -5   5    5.31    0.25 
  -7  -4   4    0.14    0.16 
  -7  -4   4    0.00    0.09 
  -8  -3   3    0.75    0.18 
  -8  -3   3    0.30    0.23 
  -9  -2   2    1.61    0.34 
  -9  -2   2    0.94    0.23 
 -10  -1   1    0.04    0.19 
  -3  -8   7    0.23    0.11 
  -4  -7   6    2.79    0.19 
  -4  -7   6    3.01    0.26 
  -5  -6   5    0.83    0.11 
  -5  -6   5    0.83    0.12 
  -5  -6   5    0.95    0.14 
  -5  -6   5    0.54    0.10 
  -6  -5   4    0.08    0.07 
  -6  -5   4    0.35    0.11 
  -7  -4   3    0.78    0.16 
  -7  -4   3    0.76    0.23 
  -8  -3   2    1.25    0.23 
  -8  -3   2    1.22    0.30 
  -9  -2   1    0.09    0.19 
  -9  -2   1    0.39    0.18 
 -10  -1   0   -0.23    0.24 
 -10  -1   0   -0.15    0.20 
  -2  -9   7    0.17    0.15 
  -3  -8   6   -0.05    0.09 
  -4  -7   5    0.95    0.13 
  -4  -7   5    1.36    0.15 
  -4  -7   5    1.14    0.16 
  -5  -6   4    0.38    0.11 
  -5  -6   4    0.50    0.10 
  -5  -6   4    0.57    0.11 
  -5  -6   4    0.44    0.09 
  -6  -5   3    0.33    0.09 
  -6  -5   3   -0.05    0.07 
  -6  -5   3    0.33    0.11 
   7   4  -2    0.36    0.09 
  -7  -4   2    0.39    0.12 
  -7  -4   2    0.28    0.13 
  -7  -4   2    0.77    0.21 
  -8  -3   1    2.97    0.32 
  -8  -3   1    3.42    0.41 
  -9  -2   0    3.18    0.37 
  -9  -2   0    3.92    0.47 
 -10  -1  -1    0.00    0.22 
 -10  -1  -1    0.03    0.20 
  -2  -9   6    0.44    0.16 
  -3  -8   5    0.08    0.10 
  -4  -7   4    0.23    0.09 
  -4  -7   4    0.29    0.09 
  -5  -6   3    1.13    0.15 
  -5  -6   3    1.16    0.11 
  -5  -6   3    1.03    0.14 
  -5  -6   3    1.04    0.14 
  -6  -5   2    0.11    0.09 
  -6  -5   2    0.07    0.10 
  -6  -5   2    0.15    0.09 
   7   4  -1    8.92    0.35 
  -7  -4   1    8.72    0.51 
  -7  -4   1    9.00    0.42 
  -7  -4   1    7.80    0.39 
  -7  -4   1    9.02    0.43 
   8   3   0    1.66    0.23 
  -8  -3   0    1.63    0.30 
  -8  -3   0    2.09    0.27 
  -9  -2  -1    0.38    0.21 
  -9  -2  -1    0.45    0.24 
 -10  -1  -2    0.61    0.28 
  -2  -9   5    0.28    0.13 
  -3  -8   4    0.01    0.09 
  -4  -7   3    6.99    0.32 
  -4  -7   3    7.02    0.32 
  -4  -7   3    6.99    0.32 
  -5  -6   2    2.69    0.23 
  -5  -6   2    2.95    0.21 
  -5  -6   2    2.88    0.11 
  -5  -6   2    3.09    0.22 
   6   5  -1    6.25    0.25 
  -6  -5   1    5.98    0.30 
  -6  -5   1    6.62    0.34 
  -6  -5   1    5.94    0.31 
   7   4   0    0.49    0.13 
  -7  -4   0    0.67    0.22 
  -7  -4   0    0.46    0.14 
  -7  -4   0    0.34    0.14 
  -7  -4   0    0.44    0.16 
   8   3   1    0.40    0.14 
  -8  -3  -1    0.29    0.16 
  -8  -3  -1    0.25    0.18 
  -9  -2  -2    1.92    0.33 
  -9  -2  -2    1.93    0.33 
 -10  -1  -3    0.88    0.30 
  -1 -10   5    0.20    0.17 
  -2  -9   4    3.26    0.31 
  -3  -8   3    1.84    0.21 
  -3  -8   3    1.51    0.19 
  -4  -7   2    2.78    0.22 
  -4  -7   2    2.79    0.23 
  -4  -7   2    3.09    0.22 
   5   6  -1    6.72    0.24 
   5   6  -1    6.85    0.22 
  -5  -6   1    6.90    0.32 
  -5  -6   1    6.95    0.32 
  -5  -6   1    6.88    0.34 
   6   5   0    0.72    0.12 
   6   5   0    0.70    0.12 
  -6  -5   0    0.57    0.12 
  -6  -5   0    0.86    0.17 
  -6  -5   0    0.38    0.12 
   7   4   1    3.81    0.28 
  -7  -4  -1    3.77    0.37 
  -7  -4  -1    4.33    0.31 
  -7  -4  -1    4.22    0.31 
  -7  -4  -1    4.33    0.33 
   8   3   2    0.72    0.18 
  -8  -3  -2    1.12    0.25 
  -8  -3  -2    1.09    0.23 
   9   2   3    0.12    0.15 
  -9  -2  -3    0.85    0.26 
  -9  -2  -3    0.40    0.24 
 -10  -1  -4    0.70    0.29 
  -1 -10   4    0.89    0.22 
  -2  -9   3    0.62    0.17 
   3   8  -2    3.50    0.17 
  -3  -8   2    3.63    0.27 
  -3  -8   2    3.58    0.28 
  -3  -8   2    3.20    0.26 
   4   7  -1    3.50    0.19 
   4   7  -1    3.71    0.18 
  -4  -7   1    3.53    0.24 
  -4  -7   1    3.44    0.25 
  -4  -7   1    3.86    0.26 
   5   6   0    0.67    0.11 
   5   6   0    0.75    0.11 
  -5  -6   0    0.72    0.13 
  -5  -6   0    0.62    0.13 
  -5  -6   0    0.62    0.14 
   6   5   1    2.87    0.22 
  -6  -5  -1    2.29    0.23 
  -6  -5  -1    2.39    0.14 
  -6  -5  -1    2.21    0.22 
  -6  -5  -1    2.62    0.23 
   7   4   2    3.50    0.29 
   7   4   2    3.36    0.28 
  -7  -4  -2    2.97    0.32 
  -7  -4  -2    2.96    0.23 
  -7  -4  -2    3.77    0.29 
  -7  -4  -2    3.15    0.31 
   8   3   3    6.91    0.43 
  -8  -3  -3    6.46    0.45 
  -8  -3  -3    7.10    0.45 
   9   2   4    0.30    0.18 
  -9  -2  -4    0.05    0.19 
  -9  -2  -4    0.06    0.18 
  -1 -10   3    0.27    0.16 
  -2  -9   2   16.84    0.64 
   3   8  -1   18.95    0.55 
   3   8  -1   19.30    0.54 
  -3  -8   1   19.72    0.64 
  -3  -8   1   18.42    0.63 
  -3  -8   1   18.40    0.62 
   4   7   0   25.20    0.66 
   4   7   0   25.53    0.65 
  -4  -7   0   25.05    0.72 
  -4  -7   0   26.56    0.74 
  -4  -7   0   25.40    0.72 
  -4  -7   0   25.95    0.75 
   5   6   1    4.28    0.25 
  -5  -6  -1    4.10    0.27 
  -5  -6  -1    4.34    0.29 
  -5  -6  -1    4.02    0.27 
   6   5   2    1.68    0.20 
   6   5   2    1.46    0.18 
  -6  -5  -2    1.57    0.14 
  -6  -5  -2    1.92    0.21 
  -6  -5  -2    2.31    0.25 
  -6  -5  -2    1.73    0.23 
   7   4   3    0.87    0.19 
   7   4   3    1.09    0.20 
  -7  -4  -3    1.32    0.23 
  -7  -4  -3    1.46    0.18 
  -7  -4  -3    1.07    0.22 
  -7  -4  -3    1.07    0.19 
   8   3   4    4.88    0.40 
   8   3   4    5.44    0.39 
  -8  -3  -4    5.04    0.42 
  -8  -3  -4    5.52    0.41 
   9   2   5    2.20    0.33 
  -9  -2  -5    1.95    0.33 
  -1 -10   2   -0.13    0.11 
   2   9  -1    0.69    0.21 
   2   9  -1    0.63    0.14 
   2   9  -1    0.75    0.16 
  -2  -9   1    0.56    0.16 
   3   8   0    0.04    0.05 
   3   8   0    0.00    0.08 
   3   8   0    0.01    0.09 
  -3  -8   0    0.30    0.13 
  -3  -8   0    0.01    0.11 
  -3  -8   0    0.08    0.11 
   4   7   1    0.13    0.07 
   4   7   1    0.21    0.10 
  -4  -7  -1    0.14    0.10 
  -4  -7  -1    0.12    0.10 
  -4  -7  -1    0.04    0.11 
  -4  -7  -1    0.02    0.08 
   5   6   2    2.42    0.23 
   5   6   2    2.66    0.24 
  -5  -6  -2    2.95    0.26 
  -5  -6  -2    2.32    0.24 
  -5  -6  -2    3.10    0.28 
   6   5   3    2.40    0.25 
   6   5   3    1.89    0.22 
  -6  -5  -3    2.06    0.15 
  -6  -5  -3    2.13    0.25 
  -6  -5  -3    2.12    0.24 
   7   4   4    2.58    0.30 
   7   4   4    2.28    0.26 
  -7  -4  -4    2.01    0.27 
  -7  -4  -4    1.73    0.27 
   8   3   5    0.21    0.18 
   8   3   5    0.05    0.14 
  -8  -3  -5    0.41    0.19 
  -8  -3  -5    0.52    0.19 
   9   2   6    0.02    0.15 
  -9  -2  -6    0.00    0.17 
   0 -11   2    1.76    0.30 
  -1 -10   1   -0.19    0.10 
   2   9   0   23.29    0.71 
   2   9   0   21.96    0.71 
   2   9   0   22.67    0.62 
  -2  -9   0   23.45    0.78 
  -2  -9   0   23.40    0.80 
   3   8   1    5.50    0.31 
   3   8   1    5.46    0.32 
   3   8   1    5.55    0.19 
  -3  -8  -1    5.24    0.34 
  -3  -8  -1    5.15    0.33 
  -3  -8  -1    5.78    0.35 
   4   7   2    2.79    0.23 
   4   7   2    2.58    0.23 
  -4  -7  -2    2.91    0.26 
  -4  -7  -2    2.69    0.26 
  -4  -7  -2    2.81    0.25 
  -4  -7  -2    3.05    0.25 
   5   6   3    1.14    0.17 
   5   6   3    0.98    0.16 
  -5  -6  -3    1.18    0.19 
  -5  -6  -3    1.20    0.19 
  -5  -6  -3    1.17    0.19 
   6   5   4    3.40    0.31 
   6   5   4    3.01    0.28 
  -6  -5  -4    3.20    0.26 
  -6  -5  -4    3.11    0.19 
  -6  -5  -4    2.71    0.28 
   7   4   5   -0.06    0.13 
   7   4   5   -0.09    0.11 
  -7  -4  -5    0.10    0.15 
  -7  -4  -5   -0.01    0.13 
   8   3   6   -0.03    0.13 
   8   3   6    0.25    0.19 
  -8  -3  -6   -0.02    0.14 
  -8  -3  -6    0.12    0.17 
   9   2   7   -0.05    0.16 
  -9  -2  -7    0.34    0.22 
   0 -11   1    0.05    0.18 
   1  10   0    1.43    0.24 
  -1 -10   0    1.54    0.25 
   2   9   1    9.17    0.44 
   2   9   1    9.66    0.45 
   2   9   1    8.81    0.35 
  -2  -9  -1    9.31    0.49 
  -2  -9  -1    8.98    0.47 
   3   8   2    8.29    0.41 
   3   8   2    8.38    0.40 
  -3  -8  -2    8.31    0.41 
  -3  -8  -2    8.37    0.42 
   4   7   3   21.31    0.45 
   4   7   3   21.17    0.67 
   4   7   3   21.09    0.67 
  -4  -7  -3   21.47    0.70 
  -4  -7  -3   21.68    0.67 
  -4  -7  -3   21.30    0.68 
  -4  -7  -3   21.44    0.69 
   5   6   4    3.64    0.29 
   5   6   4    4.06    0.30 
  -5  -6  -4    4.18    0.32 
  -5  -6  -4    4.12    0.29 
   6   5   5    6.05    0.38 
   6   5   5    5.66    0.37 
  -6  -5  -5    5.62    0.32 
  -6  -5  -5    6.09    0.40 
   7   4   6    6.13    0.41 
   7   4   6    6.30    0.43 
  -7  -4  -6    6.16    0.35 
  -7  -4  -6    6.10    0.44 
   8   3   7    2.33    0.35 
   8   3   7    2.22    0.32 
  -8  -3  -7    1.83    0.30 
   9   2   8    0.29    0.24 
   9   2   8    0.40    0.22 
  -9  -2  -8    0.24    0.22 
   0 -11   0    0.03    0.14 
   1  10   1    0.70    0.19 
   1  10   1    0.81    0.21 
  -1 -10  -1    0.81    0.21 
   2   9   2    3.02    0.30 
   2   9   2    2.82    0.28 
  -2  -9  -2    3.28    0.32 
  -2  -9  -2    3.73    0.35 
   3   8   3   10.75    0.48 
   3   8   3    9.70    0.46 
  -3  -8  -3   11.15    0.48 
  -3  -8  -3   11.25    0.49 
   4   7   4   24.96    0.76 
   4   7   4   23.79    0.56 
   4   7   4   24.59    0.75 
  -4  -7  -4   23.04    0.73 
  -4  -7  -4   24.20    0.78 
  -4  -7  -4   25.95    0.77 
   5   6   5   25.90    0.80 
   5   6   5   27.05    0.82 
   5   6   5   26.46    0.66 
  -5  -6  -5   24.23    1.04 
  -5  -6  -5   27.43    0.83 
   6   5   6    1.89    0.26 
   6   5   6    2.01    0.27 
  -6  -5  -6    1.54    0.19 
  -6  -5  -6    1.54    0.25 
   7   4   7    5.68    0.41 
   7   4   7    6.15    0.44 
  -7  -4  -7    5.49    0.43 
  -7  -4  -7    5.38    0.31 
   8   3   8   -0.03    0.18 
   8   3   8   -0.03    0.16 
  -8  -3  -8   -0.09    0.17 
   9   2   9    0.00    0.21 
   9   2   9    0.33    0.22 
  -9  -2  -9    0.60    0.26 
   0  11   1   -0.12    0.20 
   0 -11  -1   -0.01    0.13 
   1  10   2    2.27    0.30 
   1  10   2    2.91    0.33 
  -1 -10  -2    3.24    0.36 
   2   9   3   13.25    0.58 
   2   9   3   13.75    0.58 
  -2  -9  -3   13.72    0.59 
   3   8   4    0.15    0.14 
   3   8   4    0.03    0.12 
  -3  -8  -4    0.14    0.12 
  -3  -8  -4   -0.09    0.12 
  -3  -8  -4    0.09    0.15 
   4   7   5    1.26    0.14 
   4   7   5    1.32    0.21 
   4   7   5    1.31    0.20 
  -4  -7  -5    1.32    0.20 
  -4  -7  -5    1.74    0.25 
   5   6   6    3.49    0.32 
   5   6   6    4.34    0.33 
   5   6   6    4.54    0.26 
  -5  -6  -6    4.28    0.34 
   6   5   7    0.85    0.20 
   6   5   7    0.94    0.22 
   6   5   7    0.43    0.16 
  -6  -5  -7    0.96    0.14 
  -6  -5  -7    0.72    0.21 
   7   4   8    9.92    0.54 
   7   4   8    9.42    0.55 
  -7  -4  -8    8.97    0.53 
  -7  -4  -8    9.19    0.37 
   8   3   9   -0.19    0.14 
   8   3   9    0.14    0.19 
  -8  -3  -9   -0.05    0.17 
   0  11   2    0.87    0.25 
   0 -11  -2    0.78    0.24 
   1  10   3    1.42    0.26 
   1  10   3    1.23    0.24 
  -1 -10  -3    1.12    0.24 
   2   9   4    3.10    0.32 
   2   9   4    2.45    0.29 
  -2  -9  -4    2.91    0.31 
   3   8   5    4.13    0.34 
   3   8   5    3.83    0.34 
  -3  -8  -5    4.17    0.31 
  -3  -8  -5    3.77    0.36 
   4   7   6   36.97    0.90 
   4   7   6   38.55    1.06 
   4   7   6   37.16    1.05 
  -4  -7  -6   37.47    1.03 
  -4  -7  -6   37.76    1.07 
   5   6   7    0.65    0.19 
   5   6   7    0.39    0.15 
   5   6   7    0.55    0.14 
  -5  -6  -7    0.52    0.18 
   6   5   8    2.29    0.27 
   6   5   8    2.15    0.30 
   6   5   8    2.45    0.30 
  -6  -5  -8    2.11    0.29 
  -6  -5  -8    2.18    0.18 
   7   4   9    1.59    0.28 
   7   4   9    1.36    0.27 
  -7  -4  -9    1.66    0.29 
   8   3  10    0.75    0.24 
   8   3  10    0.80    0.28 
  -8  -3 -10    0.93    0.26 
   0  11   3    1.63    0.31 
   0 -11  -3    2.14    0.32 
   1  10   4    2.92    0.34 
   1  10   4    3.13    0.37 
  -1 -10  -4    3.18    0.35 
   2   9   5    0.02    0.14 
   2   9   5    0.27    0.16 
  -2  -9  -5    0.23    0.15 
   3   8   6    7.14    0.43 
   3   8   6    6.11    0.40 
  -3  -8  -6    6.44    0.44 
  -3  -8  -6    6.96    0.40 
   4   7   7    1.25    0.22 
   4   7   7    0.66    0.18 
  -4  -7  -7    1.20    0.22 
  -4  -7  -7    1.09    0.20 
   5   6   8    0.06    0.12 
   5   6   8    0.04    0.15 
   5   6   8   -0.03    0.13 
  -5  -6  -8    0.16    0.15 
  -5  -6  -8    0.05    0.12 
   6   5   9    0.64    0.19 
   6   5   9    0.26    0.18 
   6   5   9    0.33    0.18 
  -6  -5  -9    0.71    0.21 
  -6  -5  -9    0.70    0.10 
   7   4  10    0.56    0.22 
   7   4  10    0.65    0.22 
  -7  -4 -10    0.84    0.22 
   8   3  11    0.40    0.25 
   8   3  11    0.77    0.25 
  -8  -3 -11    0.66    0.26 
   0  11   4    1.82    0.32 
   0  11   4    2.24    0.35 
   0 -11  -4    1.95    0.31 
   1  10   5   -0.08    0.15 
   1  10   5   -0.09    0.13 
  -1 -10  -5    0.12    0.16 
   2   9   6    0.03    0.15 
   2   9   6   -0.08    0.14 
  -2  -9  -6   -0.24    0.15 
  -2  -9  -6    0.02    0.13 
   3   8   7    7.11    0.45 
   3   8   7    7.84    0.46 
  -3  -8  -7    7.63    0.48 
  -3  -8  -7    7.08    0.42 
   4   7   8    0.12    0.12 
   4   7   8   -0.12    0.15 
   4   7   8   -0.18    0.11 
  -4  -7  -8    0.10    0.17 
  -4  -7  -8   -0.11    0.11 
   5   6   9    1.77    0.25 
   5   6   9    1.30    0.26 
   5   6   9    1.57    0.26 
  -5  -6  -9    1.17    0.21 
  -5  -6  -9    1.87    0.28 
   6   5  10    0.57    0.24 
   6   5  10    0.66    0.21 
   6   5  10    0.47    0.18 
  -6  -5 -10    0.58    0.20 
   7   4  11    0.16    0.20 
   7   4  11    0.05    0.17 
   7   4  11   -0.33    0.20 
  -7  -4 -11    0.10    0.17 
   0  11   5    0.43    0.23 
   0  11   5    0.33    0.22 
   0 -11  -5   -0.05    0.16 
   1  10   6    6.23    0.46 
   1  10   6    4.82    0.46 
  -1 -10  -6    5.17    0.41 
   2   9   7    0.36    0.20 
   2   9   7    0.29    0.17 
  -2  -9  -7    0.38    0.20 
  -2  -9  -7    0.50    0.18 
   3   8   8    2.35    0.30 
   3   8   8    3.07    0.36 
  -3  -8  -8    3.33    0.33 
  -3  -8  -8    2.51    0.32 
   4   7   9    3.36    0.32 
   4   7   9    2.66    0.32 
   4   7   9    3.59    0.37 
  -4  -7  -9    3.80    0.38 
  -4  -7  -9    3.10    0.31 
   5   6  10    2.61    0.31 
   5   6  10    2.49    0.31 
   5   6  10    2.88    0.36 
  -5  -6 -10    2.15    0.28 
  -5  -6 -10    1.85    0.28 
   6   5  11    2.25    0.34 
   6   5  11    1.53    0.30 
   6   5  11    1.92    0.31 
  -6  -5 -11    1.63    0.28 
   7   4  12   -0.05    0.20 
   7   4  12    0.26    0.26 
   7   4  12   -0.01    0.19 
   0  11   6    1.77    0.33 
   0  11   6    2.39    0.40 
   0 -11  -6    1.91    0.31 
   1  10   7    3.79    0.41 
   1  10   7    3.72    0.41 
  -1 -10  -7    3.50    0.39 
  -1 -10  -7    4.84    0.47 
   2   9   8    0.74    0.22 
   2   9   8    0.56    0.21 
  -2  -9  -8    0.57    0.19 
  -2  -9  -8    0.59    0.21 
   3   8   9    0.97    0.24 
   3   8   9    1.22    0.25 
  -3  -8  -9    1.37    0.26 
  -3  -8  -9    1.50    0.24 
   4   7  10    4.99    0.37 
   4   7  10    4.17    0.40 
   4   7  10    4.52    0.42 
  -4  -7 -10    3.24    0.32 
  -4  -7 -10    3.92    0.38 
   5   6  11    1.71    0.29 
   5   6  11    1.79    0.30 
   5   6  11    1.82    0.29 
  -5  -6 -11    2.27    0.28 
  -5  -6 -11    1.62    0.28 
   6   5  12    0.68    0.27 
   6   5  12    0.83    0.29 
   6   5  12    0.79    0.24 
  -6  -5 -12    0.61    0.22 
   0  11   7    1.48    0.32 
   0  11   7    1.28    0.33 
   0 -11  -7    1.25    0.27 
   1  10   8   -0.05    0.17 
   1  10   8   -0.14    0.18 
  -1 -10  -8   -0.10    0.13 
  -1 -10  -8    0.26    0.22 
   2   9   9    4.77    0.45 
   2   9   9    4.25    0.45 
  -2  -9  -9    3.69    0.36 
  -2  -9  -9    3.83    0.40 
   3   8  10   25.49    0.94 
   3   8  10   26.30    0.96 
  -3  -8 -10   25.91    0.91 
  -3  -8 -10   26.38    0.88 
   4   7  11    4.94    0.45 
   4   7  11    6.27    0.43 
   4   7  11    5.87    0.48 
  -4  -7 -11    4.76    0.38 
  -4  -7 -11    5.35    0.42 
   5   6  12    4.74    0.47 
   5   6  12    4.89    0.47 
   5   6  12    3.73    0.41 
  -5  -6 -12    4.51    0.41 
   6   5  13    1.80    0.33 
   6   5  13    1.40    0.33 
   6   5  13    1.49    0.34 
   0  11   8    2.08    0.38 
   0  11   8    2.60    0.40 
   0 -11  -8    2.27    0.37 
   0 -11  -8    1.42    0.34 
   1  10   9   -0.08    0.16 
   1  10   9   -0.04    0.19 
  -1 -10  -9    0.09    0.20 
  -1 -10  -9    0.07    0.14 
   2   9  10    0.98    0.25 
   2   9  10    1.37    0.28 
  -2  -9 -10    1.50    0.27 
  -2  -9 -10    1.07    0.22 
   3   8  11    0.24    0.20 
   3   8  11    0.03    0.17 
  -3  -8 -11    0.17    0.17 
  -3  -8 -11    0.00    0.14 
   4   7  12    0.62    0.22 
   4   7  12    0.73    0.25 
   4   7  12    0.89    0.25 
  -4  -7 -12    0.57    0.21 
   5   6  13    0.72    0.26 
   5   6  13    0.58    0.24 
   5   6  13    0.69    0.26 
   0  11   9    2.29    0.39 
   0  11   9    1.61    0.38 
   0 -11  -9    1.50    0.35 
   1  10  10    0.25    0.24 
   1  10  10    0.60    0.27 
  -1 -10 -10    0.71    0.27 
   2   9  11    5.11    0.49 
   2   9  11    3.86    0.45 
  -2  -9 -11    4.53    0.45 
   3   8  12    1.93    0.33 
   3   8  12    1.23    0.28 
  -3  -8 -12    1.51    0.28 
   4   7  13   -0.08    0.19 
   4   7  13   -0.13    0.14 
   4   7  13    0.54    0.24 
   5   6  14    0.10    0.22 
   5   6  14   -0.10    0.17 
   5   6  14    0.24    0.25 
   1  10  11    0.49    0.27 
   1  10  11    1.43    0.34 
   2   9  12    5.09    0.52 
   2   9  12    4.46    0.48 
   3   8  13   -0.23    0.19 
   3   8  13    0.37    0.21 
   4   7  14    0.48    0.25 
   4   7  14   -0.06    0.18 
   4   7  14    0.08    0.23 
   2   9  13    3.99    0.51 
   2   9  13    4.37    0.50 
  -6  -6   8    1.74    0.31 
  -7  -5   7    0.73    0.13 
  -7  -5   7    1.32    0.31 
  -8  -4   6    0.49    0.24 
  -8  -4   6    0.49    0.15 
  -9  -3   5    1.06    0.22 
  -9  -3   5    0.51    0.27 
  -5  -7   8    0.06    0.05 
  -6  -6   7    1.57    0.15 
  -6  -6   7    1.20    0.12 
  -7  -5   6   -0.07    0.15 
  -7  -5   6   -0.06    0.08 
  -8  -4   5    1.70    0.23 
  -8  -4   5    1.73    0.33 
  -9  -3   4   -0.30    0.18 
  -9  -3   4    0.01    0.15 
  -5  -7   7    0.03    0.08 
  -5  -7   7   -0.03    0.06 
  -6  -6   6    0.88    0.13 
  -7  -5   5   -0.02    0.15 
  -7  -5   5   -0.02    0.09 
  -8  -4   4    0.66    0.24 
  -8  -4   4    0.44    0.16 
  -9  -3   3    0.24    0.21 
  -9  -3   3    0.24    0.16 
  -4  -8   7    0.51    0.11 
  -5  -7   6   -0.03    0.08 
  -5  -7   6    0.07    0.08 
  -6  -6   5    0.88    0.14 
  -6  -6   5    0.79    0.13 
  -7  -5   4   -0.15    0.14 
  -7  -5   4    0.06    0.09 
  -8  -4   3    0.22    0.13 
  -8  -4   3    0.13    0.18 
  -9  -3   2    0.15    0.22 
  -9  -3   2    0.11    0.15 
 -10  -2   1    1.14    0.28 
 -10  -2   1    2.34    0.41 
  -3  -9   7    1.32    0.20 
  -4  -8   6    1.01    0.15 
  -5  -7   5    0.19    0.14 
  -5  -7   5    0.11    0.08 
  -5  -7   5    0.10    0.10 
  -6  -6   4    7.83    0.34 
  -6  -6   4    7.85    0.30 
  -6  -6   4    7.93    0.33 
  -7  -5   3    0.57    0.14 
  -7  -5   3    0.86    0.23 
  -8  -4   2    0.09    0.12 
  -8  -4   2    0.10    0.19 
  -9  -3   1    0.74    0.27 
  -9  -3   1    0.72    0.20 
 -10  -2   0    0.44    0.21 
 -10  -2   0    0.69    0.29 
  -3  -9   6    0.19    0.12 
  -4  -8   5    0.37    0.12 
  -5  -7   4    1.17    0.15 
  -5  -7   4    1.39    0.17 
  -5  -7   4    1.36    0.13 
  -5  -7   4    1.38    0.17 
  -6  -6   3    1.01    0.14 
  -6  -6   3    1.17    0.16 
  -7  -5   2    1.49    0.21 
  -7  -5   2    1.86    0.24 
  -7  -5   2    1.50    0.26 
  -8  -4   1   -0.05    0.16 
  -8  -4   1    0.00    0.12 
  -9  -3   0    0.29    0.20 
  -9  -3   0    0.10    0.17 
 -10  -2  -1   -0.13    0.18 
 -10  -2  -1   -0.07    0.22 
  -3  -9   5   -0.02    0.11 
  -4  -8   4    0.14    0.10 
  -5  -7   3    0.71    0.13 
  -5  -7   3    0.69    0.14 
  -5  -7   3    0.60    0.12 
  -6  -6   2    0.19    0.11 
  -6  -6   2    0.20    0.10 
  -6  -6   2    0.16    0.10 
   7   5  -1    2.28    0.19 
  -7  -5   1    1.76    0.20 
  -7  -5   1    2.40    0.26 
  -7  -5   1    1.77    0.29 
  -7  -5   1    1.62    0.26 
  -8  -4   0    2.28    0.32 
  -8  -4   0    2.48    0.30 
  -9  -3  -1    2.14    0.32 
  -9  -3  -1    2.28    0.36 
 -10  -2  -2    0.03    0.20 
 -10  -2  -2    0.01    0.23 
  -2 -10   5    0.06    0.15 
  -3  -9   4    6.19    0.37 
  -4  -8   3    0.04    0.16 
  -4  -8   3   -0.08    0.08 
  -5  -7   2    0.19    0.10 
  -5  -7   2    0.16    0.12 
  -5  -7   2    0.06    0.09 
  -5  -7   2    0.15    0.10 
   6   6  -1    5.29    0.22 
  -6  -6   1    5.25    0.15 
  -6  -6   1    5.14    0.30 
  -6  -6   1    4.92    0.29 
  -6  -6   1    5.48    0.32 
   7   5   0    3.45    0.24 
  -7  -5   0    3.86    0.31 
  -7  -5   0    3.80    0.29 
  -7  -5   0    3.41    0.34 
  -7  -5   0    3.79    0.28 
   8   4   1    2.12    0.25 
  -8  -4  -1    2.10    0.30 
  -8  -4  -1    2.01    0.27 
  -9  -3  -2    0.01    0.17 
  -9  -3  -2    0.09    0.20 
 -10  -2  -3    0.58    0.25 
 -10  -2  -3    0.06    0.22 
  -2 -10   4    0.12    0.15 
  -3  -9   3    3.93    0.31 
  -4  -8   2    0.13    0.10 
  -4  -8   2    0.03    0.10 
   5   7  -1   38.12    0.78 
   5   7  -1   37.22    0.82 
  -5  -7   1   37.61    0.96 
  -5  -7   1   38.49    0.97 
  -5  -7   1   37.88    0.95 
  -5  -7   1   38.94    0.99 
   6   6   0    0.03    0.08 
   6   6   0   -0.08    0.06 
  -6  -6   0    0.04    0.08 
  -6  -6   0   -0.01    0.09 
  -6  -6   0    0.04    0.11 
   7   5   1   -0.06    0.07 
   7   5   1    0.10    0.10 
  -7  -5  -1    0.22    0.14 
  -7  -5  -1    0.19    0.09 
  -7  -5  -1    0.10    0.12 
  -7  -5  -1    0.06    0.10 
  -7  -5  -1   -0.13    0.13 
   8   4   2    1.10    0.21 
  -8  -4  -2    1.31    0.25 
  -8  -4  -2    1.59    0.25 
   9   3   3    2.18    0.32 
  -9  -3  -3    1.91    0.31 
  -9  -3  -3    2.46    0.35 
 -10  -2  -4    3.62    0.46 
 -10  -2  -4    3.85    0.49 
  -2 -10   3    0.23    0.14 
  -3  -9   2    1.06    0.19 
   4   8  -1    2.00    0.15 
   4   8  -1    1.97    0.17 
  -4  -8   1    1.80    0.21 
  -4  -8   1    2.35    0.25 
  -4  -8   1    1.80    0.21 
   5   7   0    1.47    0.15 
   5   7   0    1.35    0.15 
  -5  -7   0    1.54    0.21 
  -5  -7   0    1.47    0.18 
  -5  -7   0    1.52    0.20 
   6   6   1    4.27    0.26 
   6   6   1    2.84    0.22 
  -6  -6  -1    4.32    0.31 
  -6  -6  -1    4.52    0.29 
  -6  -6  -1    4.42    0.30 
   7   5   2    0.43    0.15 
   7   5   2    0.22    0.12 
  -7  -5  -2    0.14    0.12 
  -7  -5  -2    0.30    0.09 
  -7  -5  -2    0.13    0.13 
  -7  -5  -2    0.10    0.15 
   8   4   3    0.75    0.19 
   8   4   3    0.75    0.18 
  -8  -4  -3    1.29    0.25 
  -8  -4  -3    0.55    0.19 
   9   3   4    2.51    0.33 
  -9  -3  -4    2.19    0.33 
  -9  -3  -4    3.19    0.37 
 -10  -2  -5    3.82    0.47 
  -1 -11   3    0.41    0.19 
  -2 -10   2    0.04    0.13 
   3   9  -1    9.76    0.38 
   3   9  -1    9.04    0.58 
  -3  -9   1    9.52    0.46 
   4   8   0   23.19    0.65 
   4   8   0   23.64    0.64 
  -4  -8   0   24.21    0.74 
  -4  -8   0   23.79    0.73 
  -4  -8   0   23.80    0.73 
   5   7   1    5.49    0.28 
   5   7   1    4.51    0.27 
  -5  -7  -1    3.94    0.31 
  -5  -7  -1    4.81    0.31 
  -5  -7  -1    4.71    0.31 
   6   6   2    2.14    0.22 
   6   6   2    2.18    0.22 
  -6  -6  -2    2.04    0.25 
  -6  -6  -2    2.21    0.23 
  -6  -6  -2    2.65    0.26 
   7   5   3    0.18    0.14 
   7   5   3    0.02    0.11 
  -7  -5  -3    0.12    0.12 
  -7  -5  -3   -0.07    0.13 
  -7  -5  -3    0.26    0.10 
  -7  -5  -3    0.21    0.15 
   8   4   4    8.53    0.48 
   8   4   4    9.91    0.52 
  -8  -4  -4   10.39    0.55 
  -8  -4  -4    9.46    0.50 
   9   3   5    1.55    0.27 
  -9  -3  -5    1.54    0.32 
  -9  -3  -5    1.15    0.26 
 -10  -2  -6    0.20    0.24 
  -1 -11   2    2.50    0.32 
  -2 -10   1    0.65    0.18 
   3   9   0    3.38    0.26 
   3   9   0    4.08    0.17 
   3   9   0    4.08    0.28 
  -3  -9   0    4.03    0.33 
  -3  -9   0    3.94    0.31 
  -3  -9   0    3.97    0.34 
   4   8   1    2.37    0.23 
  -4  -8  -1    1.92    0.22 
  -4  -8  -1    2.15    0.27 
  -4  -8  -1    2.90    0.29 
  -4  -8  -1    2.04    0.24 
   5   7   2    2.14    0.22 
   5   7   2    1.82    0.20 
  -5  -7  -2    2.68    0.27 
  -5  -7  -2    2.18    0.26 
  -5  -7  -2    2.14    0.23 
   6   6   3    0.73    0.16 
   6   6   3    0.46    0.14 
  -6  -6  -3    0.68    0.15 
  -6  -6  -3    0.55    0.16 
   7   5   4    5.34    0.37 
   7   5   4    5.52    0.37 
  -7  -5  -4    5.85    0.41 
  -7  -5  -4    6.05    0.37 
  -7  -5  -4    5.64    0.28 
   8   4   5    0.64    0.20 
   8   4   5    1.03    0.21 
  -8  -4  -5    0.30    0.17 
  -8  -4  -5    0.80    0.23 
   9   3   6    0.31    0.21 
   9   3   6    0.07    0.17 
  -9  -3  -6    0.39    0.20 
  -9  -3  -6    0.04    0.18 
  -1 -11   1    0.25    0.17 
   2  10   0    6.17    0.36 
  -2 -10   0    5.42    0.40 
   3   9   1    1.27    0.19 
   3   9   1    1.22    0.12 
   3   9   1    1.06    0.18 
  -3  -9  -1    0.82    0.18 
  -3  -9  -1    1.32    0.22 
   4   8   2   19.05    0.62 
   4   8   2   18.48    0.61 
  -4  -8  -2   17.13    0.62 
  -4  -8  -2   17.53    0.63 
  -4  -8  -2   18.23    0.63 
  -4  -8  -2   18.22    0.67 
   5   7   3    5.28    0.33 
   5   7   3    5.71    0.33 
  -5  -7  -3    5.93    0.35 
  -5  -7  -3    4.96    0.36 
   6   6   4    4.14    0.31 
   6   6   4    3.88    0.32 
  -6  -6  -4    3.11    0.32 
  -6  -6  -4    3.35    0.28 
   7   5   5    0.11    0.16 
   7   5   5    0.25    0.14 
  -7  -5  -5    0.17    0.13 
  -7  -5  -5    0.15    0.15 
   8   4   6    1.51    0.28 
   8   4   6    1.96    0.28 
  -8  -4  -6    1.38    0.23 
  -8  -4  -6    1.92    0.32 
   9   3   7   -0.15    0.17 
   9   3   7    0.07    0.16 
  -9  -3  -7    0.14    0.20 
  -1 -11   0    0.40    0.18 
   2  10   1    1.45    0.24 
   2  10   1    1.63    0.25 
  -2 -10  -1    1.64    0.26 
   3   9   2    0.36    0.14 
   3   9   2    0.23    0.13 
  -3  -9  -2    0.25    0.14 
  -3  -9  -2    0.27    0.16 
   4   8   3   24.61    0.52 
   4   8   3   25.65    0.78 
   4   8   3   26.82    0.79 
  -4  -8  -3   25.30    0.79 
  -4  -8  -3   25.40    0.82 
  -4  -8  -3   25.55    0.79 
   5   7   4   26.51    0.81 
   5   7   4   25.72    0.80 
   5   7   4   25.44    0.58 
  -5  -7  -4   25.84    0.80 
  -5  -7  -4   26.64    0.84 
  -5  -7  -4   27.48    0.82 
   6   6   5    1.53    0.23 
   6   6   5    1.52    0.23 
  -6  -6  -5    1.55    0.25 
   7   5   6    0.34    0.17 
   7   5   6    0.47    0.17 
  -7  -5  -6    0.19    0.16 
  -7  -5  -6    0.26    0.14 
   8   4   7    7.09    0.48 
   8   4   7    6.80    0.50 
  -8  -4  -7    7.28    0.39 
  -8  -4  -7    6.63    0.49 
   9   3   8    0.08    0.23 
   9   3   8    0.03    0.17 
  -9  -3  -8    0.11    0.20 
  -1 -11  -1    8.58    0.54 
   2  10   2    5.55    0.40 
   2  10   2    6.18    0.42 
  -2 -10  -2    6.10    0.43 
   3   9   3    0.03    0.13 
   3   9   3    0.26    0.16 
  -3  -9  -3    0.29    0.16 
  -3  -9  -3    0.25    0.14 
   4   8   4    0.06    0.14 
   4   8   4   -0.11    0.12 
  -4  -8  -4   -0.04    0.12 
  -4  -8  -4    0.04    0.15 
  -4  -8  -4    0.07    0.11 
   5   7   5    1.82    0.25 
   5   7   5    1.77    0.16 
   5   7   5    1.60    0.23 
  -5  -7  -5    1.66    0.24 
  -5  -7  -5    1.93    0.24 
   6   6   6    0.71    0.15 
   6   6   6    0.72    0.19 
   6   6   6    0.60    0.18 
  -6  -6  -6    0.21    0.17 
   7   5   7   17.18    0.71 
   7   5   7   16.71    0.70 
  -7  -5  -7   17.41    0.57 
  -7  -5  -7   16.64    0.71 
   8   4   8    1.09    0.26 
   8   4   8    0.79    0.22 
  -8  -4  -8    0.66    0.17 
  -8  -4  -8    0.66    0.23 
   9   3   9    0.38    0.25 
   9   3   9    0.25    0.21 
  -9  -3  -9    0.23    0.21 
   1  11   2    0.90    0.25 
  -1 -11  -2    0.55    0.22 
   2  10   3    2.70    0.33 
   2  10   3    2.27    0.30 
  -2 -10  -3    2.11    0.28 
   3   9   4   13.71    0.59 
   3   9   4   12.98    0.58 
  -3  -9  -4   12.65    0.56 
  -3  -9  -4   13.39    0.62 
   4   8   5   27.33    0.86 
   4   8   5   25.59    0.84 
  -4  -8  -5   26.96    0.84 
  -4  -8  -5   25.79    0.87 
   5   7   6    7.59    0.33 
   5   7   6    8.09    0.46 
   5   7   6    7.88    0.44 
  -5  -7  -6    8.38    0.47 
  -5  -7  -6    8.39    0.43 
   6   6   7    1.72    0.26 
   6   6   7    1.97    0.28 
   6   6   7    1.83    0.22 
  -6  -6  -7    1.86    0.29 
   7   5   8    0.43    0.19 
   7   5   8    0.42    0.18 
  -7  -5  -8    0.48    0.13 
  -7  -5  -8    0.06    0.16 
   8   4   9    3.54    0.44 
   8   4   9    3.00    0.38 
  -8  -4  -9    2.71    0.37 
   0 -12  -2    1.15    0.26 
   1  11   3    0.58    0.27 
   1  11   3    0.07    0.18 
  -1 -11  -3   -0.20    0.14 
   2  10   4    1.31    0.24 
   2  10   4    1.13    0.25 
  -2 -10  -4    1.48    0.24 
   3   9   5    0.99    0.20 
   3   9   5    0.82    0.20 
  -3  -9  -5    0.92    0.19 
  -3  -9  -5    0.46    0.20 
   4   8   6   19.82    0.73 
   4   8   6   18.79    0.72 
  -4  -8  -6   19.53    0.74 
  -4  -8  -6   19.23    0.70 
   5   7   7    0.07    0.15 
   5   7   7    0.38    0.13 
   5   7   7    0.19    0.17 
  -5  -7  -7    0.18    0.16 
  -5  -7  -7    0.17    0.14 
   6   6   8    5.25    0.40 
   6   6   8    4.68    0.40 
   6   6   8    4.57    0.32 
  -6  -6  -8    4.76    0.25 
  -6  -6  -8    5.46    0.41 
   7   5   9    2.11    0.31 
   7   5   9    2.41    0.34 
   7   5   9    2.56    0.35 
  -7  -5  -9    2.72    0.36 
  -7  -5  -9    2.31    0.20 
   8   4  10    0.08    0.16 
   8   4  10   -0.07    0.19 
  -8  -4 -10    0.19    0.19 
   0  12   3    1.37    0.33 
   0 -12  -3    1.29    0.29 
   1  11   4    0.37    0.22 
   1  11   4    0.54    0.21 
  -1 -11  -4    0.63    0.22 
   2  10   5    1.85    0.28 
   2  10   5    2.58    0.33 
  -2 -10  -5    2.71    0.33 
   3   9   6    0.06    0.15 
   3   9   6    0.11    0.15 
  -3  -9  -6   -0.17    0.15 
  -3  -9  -6    0.09    0.12 
   4   8   7   14.00    0.62 
   4   8   7   12.50    0.59 
  -4  -8  -7   12.87    0.61 
  -4  -8  -7   13.70    0.59 
   5   7   8    0.36    0.14 
   5   7   8    0.07    0.16 
   5   7   8    0.09    0.14 
  -5  -7  -8    0.19    0.14 
  -5  -7  -8    0.31    0.18 
   6   6   9    1.29    0.27 
   6   6   9    1.75    0.28 
   6   6   9    1.66    0.24 
  -6  -6  -9    1.76    0.29 
  -6  -6  -9    1.81    0.15 
   7   5  10    0.03    0.16 
   7   5  10    0.08    0.17 
   7   5  10    0.31    0.21 
  -7  -5 -10    0.11    0.18 
   8   4  11   -0.03    0.22 
   8   4  11   -0.03    0.17 
  -8  -4 -11   -0.24    0.17 
   0  12   4   -0.19    0.19 
   0 -12  -4   -0.48    0.16 
   1  11   5    0.36    0.22 
   1  11   5    0.32    0.20 
  -1 -11  -5    0.05    0.16 
   2  10   6    0.23    0.18 
   2  10   6    0.07    0.17 
  -2 -10  -6    0.12    0.15 
  -2 -10  -6   -0.08    0.18 
   3   9   7    1.51    0.26 
   3   9   7    1.85    0.29 
  -3  -9  -7    1.47    0.28 
  -3  -9  -7    1.23    0.22 
   4   8   8    8.30    0.50 
   4   8   8    8.26    0.50 
  -4  -8  -8    7.61    0.45 
  -4  -8  -8    8.03    0.50 
   5   7   9    2.13    0.26 
   5   7   9    2.36    0.33 
   5   7   9    1.87    0.29 
  -5  -7  -9    2.13    0.31 
  -5  -7  -9    2.09    0.27 
   6   6  10    8.37    0.54 
   6   6  10    7.95    0.47 
   6   6  10    8.67    0.53 
  -6  -6 -10    8.23    0.48 
  -6  -6 -10    8.46    0.52 
   7   5  11    0.12    0.20 
   7   5  11    0.04    0.17 
   7   5  11    0.18    0.22 
  -7  -5 -11    0.24    0.19 
   0  12   5   -0.14    0.21 
   0 -12  -5    0.00    0.17 
   1  11   6    0.81    0.25 
   1  11   6    0.35    0.23 
  -1 -11  -6    0.56    0.21 
   2  10   7    0.47    0.20 
   2  10   7    0.27    0.19 
  -2 -10  -7    0.34    0.23 
  -2 -10  -7    0.56    0.19 
   3   9   8   13.46    0.65 
   3   9   8   12.84    0.64 
  -3  -9  -8   12.80    0.59 
  -3  -9  -8   12.48    0.65 
   4   8   9    0.69    0.23 
   4   8   9    0.49    0.19 
  -4  -8  -9    1.19    0.25 
  -4  -8  -9    0.78    0.19 
   5   7  10   -0.06    0.13 
   5   7  10    0.07    0.19 
   5   7  10    0.41    0.19 
  -5  -7 -10    0.00    0.12 
  -5  -7 -10    0.15    0.18 
   6   6  11   14.36    0.72 
   6   6  11   13.58    0.64 
   6   6  11   13.30    0.68 
  -6  -6 -11   12.36    0.60 
  -6  -6 -11   14.60    0.68 
   7   5  12    1.33    0.32 
   7   5  12    1.59    0.34 
   7   5  12    1.53    0.32 
  -7  -5 -12    1.33    0.28 
   1  11   7    0.08    0.19 
   1  11   7    0.17    0.22 
  -1 -11  -7    0.09    0.16 
   2  10   8    0.38    0.22 
   2  10   8    0.34    0.20 
  -2 -10  -8    0.26    0.21 
  -2 -10  -8    0.24    0.17 
   3   9   9    0.33    0.20 
   3   9   9   -0.18    0.16 
  -3  -9  -9    0.11    0.16 
  -3  -9  -9    0.01    0.18 
   4   8  10   -0.02    0.16 
   4   8  10    0.17    0.20 
  -4  -8 -10    0.21    0.15 
  -4  -8 -10    0.23    0.19 
   5   7  11    4.50    0.45 
   5   7  11    3.82    0.39 
   5   7  11    4.80    0.46 
  -5  -7 -11    3.89    0.39 
  -5  -7 -11    4.34    0.39 
   6   6  12    0.20    0.21 
   6   6  12    0.24    0.20 
   6   6  12    0.36    0.24 
  -6  -6 -12    0.59    0.23 
   7   5  13    1.39    0.32 
   7   5  13    1.36    0.34 
   7   5  13    1.53    0.37 
   1  11   8    0.05    0.22 
   1  11   8    0.03    0.18 
  -1 -11  -8    0.31    0.18 
  -1 -11  -8    0.67    0.28 
   2  10   9    1.82    0.32 
   2  10   9    1.61    0.32 
  -2 -10  -9    1.83    0.33 
  -2 -10  -9    1.47    0.29 
   3   9  10    0.38    0.20 
   3   9  10    0.33    0.23 
  -3  -9 -10    0.28    0.21 
  -3  -9 -10    0.25    0.16 
   4   8  11    0.81    0.24 
   4   8  11    0.46    0.21 
   4   8  11    0.63    0.21 
  -4  -8 -11    0.60    0.18 
  -4  -8 -11    0.77    0.23 
   5   7  12    0.80    0.24 
   5   7  12    0.85    0.26 
   5   7  12    0.57    0.25 
  -5  -7 -12    0.68    0.22 
   6   6  13    4.28    0.51 
   6   6  13    3.81    0.46 
   6   6  13    3.63    0.45 
   1  11   9    0.84    0.29 
   1  11   9    1.11    0.30 
  -1 -11  -9    0.07    0.24 
  -1 -11  -9    0.26    0.28 
   2  10  10    0.94    0.26 
   2  10  10    0.66    0.25 
  -2 -10 -10    0.13    0.17 
  -2 -10 -10    0.66    0.25 
   3   9  11    1.12    0.29 
   3   9  11    1.53    0.30 
  -3  -9 -11    1.85    0.32 
   4   8  12    0.81    0.25 
   4   8  12    0.83    0.23 
   4   8  12    0.97    0.25 
  -4  -8 -12    0.84    0.24 
   5   7  13    0.14    0.22 
   5   7  13    0.18    0.20 
   5   7  13    0.14    0.19 
   1  11  10    0.24    0.25 
   1  11  10   -0.15    0.20 
  -1 -11 -10   -0.25    0.19 
   2  10  11    1.38    0.33 
   2  10  11    1.36    0.32 
  -2 -10 -11    1.28    0.30 
   3   9  12    2.40    0.39 
   3   9  12    2.59    0.39 
  -3  -9 -12    2.64    0.36 
   4   8  13    0.60    0.23 
   4   8  13    0.18    0.23 
   4   8  13    0.65    0.23 
   5   7  14    0.78    0.29 
   5   7  14    0.42    0.24 
   5   7  14    0.31    0.23 
   2  10  12    0.67    0.31 
   2  10  12    0.27    0.22 
   3   9  13    0.40    0.26 
   3   9  13    0.33    0.23 
  -7  -6   7    0.57    0.26 
  -7  -6   7    0.54    0.12 
  -8  -5   6   -0.10    0.09 
  -8  -5   6    0.21    0.20 
  -9  -4   5    1.91    0.28 
  -6  -7   7    0.46    0.09 
  -6  -7   7    0.53    0.11 
  -7  -6   6    0.25    0.21 
  -7  -6   6    0.11    0.09 
  -8  -5   5    0.71    0.26 
  -8  -5   5    0.12    0.12 
  -9  -4   4   -0.15    0.19 
  -9  -4   4    0.21    0.14 
  -5  -8   7   -0.10    0.10 
  -5  -8   7    0.06    0.08 
  -6  -7   6    1.06    0.13 
  -6  -7   6    0.71    0.13 
  -7  -6   5    8.68    0.55 
  -7  -6   5    7.61    0.36 
  -8  -5   4    0.64    0.15 
  -8  -5   4    0.79    0.24 
  -9  -4   3    0.24    0.23 
  -9  -4   3    0.24    0.16 
 -10  -3   2    2.70    0.46 
 -10  -3   2    1.34    0.29 
  -5  -8   6    0.09    0.11 
  -5  -8   6   -0.03    0.08 
  -6  -7   5    0.06    0.08 
  -6  -7   5   -0.01    0.09 
  -7  -6   4    0.49    0.14 
  -8  -5   3    0.09    0.11 
  -8  -5   3   -0.03    0.16 
  -9  -4   2    0.02    0.14 
  -9  -4   2   -0.08    0.20 
 -10  -3   1    0.03    0.25 
 -10  -3   1    0.38    0.20 
  -4  -9   6    0.45    0.13 
  -5  -8   5    0.11    0.09 
  -5  -8   5    0.31    0.12 
  -6  -7   4    2.64    0.24 
  -6  -7   4    2.66    0.21 
  -7  -6   3   -0.03    0.10 
  -8  -5   2    0.10    0.19 
  -8  -5   2    0.08    0.11 
  -9  -4   1    0.22    0.17 
  -9  -4   1    0.17    0.20 
 -10  -3   0    0.24    0.25 
 -10  -3   0    0.41    0.21 
  -4  -9   5    0.33    0.13 
  -5  -8   4    1.13    0.16 
  -5  -8   4    0.90    0.17 
  -6  -7   3   -0.14    0.08 
  -7  -6   2    3.67    0.28 
  -8  -5   1    0.89    0.20 
  -8  -5   1    0.67    0.24 
  -9  -4   0    1.26    0.30 
  -9  -4   0    0.99    0.23 
 -10  -3  -1   -0.10    0.19 
 -10  -3  -1    0.23    0.19 
  -3 -10   5    2.77    0.30 
  -4  -9   4    0.42    0.14 
  -5  -8   3   -0.04    0.11 
  -5  -8   3   -0.01    0.09 
  -6  -7   2    9.91    0.44 
  -6  -7   2    9.86    0.41 
   7   6  -1   -0.11    0.08 
  -7  -6   1   -0.09    0.09 
  -8  -5   0    4.86    0.37 
  -8  -5   0    5.03    0.47 
  -9  -4  -1    1.04    0.29 
  -9  -4  -1    1.11    0.23 
 -10  -3  -2    0.12    0.19 
 -10  -3  -2    0.17    0.23 
  -3 -10   4    0.66    0.18 
  -4  -9   3    0.02    0.11 
  -5  -8   2    0.17    0.10 
  -5  -8   2    0.19    0.13 
  -5  -8   2    0.19    0.17 
   6   7  -1    2.70    0.16 
  -6  -7   1    2.32    0.25 
  -6  -7   1    2.69    0.24 
   7   6   0    0.42    0.12 
  -7  -6   0    0.29    0.07 
  -7  -6   0    0.16    0.10 
  -7  -6   0    0.24    0.19 
  -7  -6   0    0.32    0.14 
   8   5   1    0.08    0.09 
  -8  -5  -1    0.17    0.16 
  -8  -5  -1    0.15    0.15 
  -9  -4  -2    0.24    0.17 
  -9  -4  -2   -0.18    0.17 
 -10  -3  -3    2.67    0.40 
 -10  -3  -3    2.60    0.39 
  -3 -10   3    0.80    0.19 
  -4  -9   2    5.06    0.33 
   5   8  -1   19.93    0.52 
   5   8  -1   21.23    0.50 
  -5  -8   1   20.41    0.68 
  -5  -8   1   20.38    0.65 
  -5  -8   1   21.03    0.66 
   6   7   0   13.29    0.43 
  -6  -7   0   12.19    0.49 
  -6  -7   0   11.49    0.49 
  -6  -7   0   13.25    0.53 
   7   6   1    1.02    0.16 
   7   6   1    0.82    0.15 
  -7  -6  -1    0.96    0.18 
  -7  -6  -1    0.99    0.10 
  -7  -6  -1    0.85    0.19 
  -7  -6  -1    0.76    0.19 
   8   5   2    0.17    0.12 
   8   5   2    0.29    0.13 
  -8  -5  -2    0.02    0.15 
  -8  -5  -2    0.31    0.16 
  -9  -4  -3    1.85    0.32 
  -9  -4  -3    3.20    0.37 
 -10  -3  -4    0.14    0.23 
 -10  -3  -4    0.50    0.26 
  -2 -11   3    0.33    0.19 
  -3 -10   2    2.87    0.31 
  -4  -9   1    3.60    0.29 
   5   8   0    1.67    0.17 
   5   8   0    1.67    0.17 
  -5  -8   0    1.72    0.22 
  -5  -8   0    1.19    0.18 
  -5  -8   0    1.66    0.24 
  -5  -8   0    1.39    0.20 
   6   7   1   13.82    0.48 
   6   7   1   13.81    0.49 
  -6  -7  -1   13.44    0.53 
  -6  -7  -1   13.69    0.56 
  -6  -7  -1   13.43    0.53 
   7   6   2    2.39    0.25 
   7   6   2    2.19    0.23 
  -7  -6  -2    2.02    0.26 
  -7  -6  -2    2.03    0.14 
  -7  -6  -2    2.30    0.26 
   8   5   3    1.27    0.23 
   8   5   3    1.31    0.23 
  -8  -5  -3    1.25    0.24 
  -8  -5  -3    1.10    0.24 
   9   4   4    0.21    0.16 
  -9  -4  -4    0.27    0.20 
  -9  -4  -4   -0.02    0.18 
 -10  -3  -5    5.53    0.56 
 -10  -3  -5    5.35    0.50 
  -2 -11   2    0.77    0.22 
  -3 -10   1    5.04    0.38 
   4   9   0    0.54    0.12 
   4   9   0    0.45    0.13 
  -4  -9   0    0.19    0.12 
   5   8   1   44.42    1.06 
   5   8   1   43.76    1.06 
  -5  -8  -1   43.99    1.14 
  -5  -8  -1   44.44    1.16 
  -5  -8  -1   42.76    1.12 
  -5  -8  -1   44.45    1.14 
   6   7   2   15.32    0.55 
   6   7   2   16.06    0.55 
  -6  -7  -2   15.94    0.59 
  -6  -7  -2   15.37    0.58 
  -6  -7  -2   15.81    0.61 
   7   6   3    0.11    0.12 
   7   6   3    0.02    0.11 
  -7  -6  -3    0.10    0.11 
  -7  -6  -3    0.01    0.06 
  -7  -6  -3    0.12    0.14 
   8   5   4    0.35    0.18 
   8   5   4   -0.01    0.13 
  -8  -5  -4    0.35    0.18 
  -8  -5  -4    0.12    0.15 
   9   4   5    4.33    0.41 
   9   4   5    4.79    0.47 
  -9  -4  -5    4.13    0.41 
  -9  -4  -5    5.69    0.48 
 -10  -3  -6    0.60    0.27 
  -2 -11   1    0.45    0.19 
  -3 -10   0    0.63    0.18 
   4   9   1    4.53    0.29 
  -4  -9  -1    3.37    0.31 
  -4  -9  -1    4.52    0.43 
  -4  -9  -1    2.85    0.28 
   5   8   2   22.58    0.69 
   5   8   2   22.58    0.69 
  -5  -8  -2   24.25    0.78 
  -5  -8  -2   21.97    0.73 
  -5  -8  -2   22.04    0.72 
  -5  -8  -2   21.06    0.73 
   6   7   3    0.60    0.15 
   6   7   3    0.47    0.16 
  -6  -7  -3    0.53    0.18 
  -6  -7  -3    0.82    0.18 
   7   6   4    4.44    0.34 
   7   6   4    4.26    0.34 
  -7  -6  -4    3.53    0.39 
  -7  -6  -4    4.78    0.38 
   8   5   5   -0.08    0.13 
   8   5   5    0.08    0.15 
  -8  -5  -5    0.18    0.18 
  -8  -5  -5    0.06    0.14 
   9   4   6    0.06    0.18 
   9   4   6    0.16    0.15 
  -9  -4  -6    0.36    0.22 
  -9  -4  -6    0.08    0.17 
  10   3   7    0.98    0.36 
 -10  -3  -7    0.74    0.27 
  -2 -11   0    0.11    0.15 
   3  10   1   10.61    0.48 
  -3 -10  -1   10.44    0.53 
   4   9   2   -0.11    0.10 
   4   9   2   -0.03    0.11 
  -4  -9  -2    0.26    0.18 
  -4  -9  -2   -0.13    0.11 
  -4  -9  -2    0.07    0.12 
   5   8   3    8.19    0.43 
   5   8   3    8.57    0.43 
  -5  -8  -3    8.84    0.46 
  -5  -8  -3    8.25    0.43 
  -5  -8  -3    8.20    0.47 
   6   7   4    1.50    0.23 
   6   7   4    1.98    0.26 
  -6  -7  -4    1.81    0.24 
  -6  -7  -4    1.67    0.26 
   7   6   5    6.16    0.41 
   7   6   5    6.68    0.43 
  -7  -6  -5    6.64    0.38 
  -7  -6  -5    7.28    0.46 
   8   5   6    3.13    0.36 
   8   5   6    3.17    0.36 
  -8  -5  -6    3.45    0.33 
  -8  -5  -6    3.58    0.40 
   9   4   7   -0.18    0.18 
   9   4   7    0.15    0.17 
  -9  -4  -7   -0.01    0.16 
  -9  -4  -7    0.08    0.20 
  -1 -12   0    0.28    0.20 
  -2 -11  -1    0.06    0.15 
   3  10   2    2.31    0.28 
   3  10   2    1.54    0.25 
  -3 -10  -2    2.20    0.27 
   4   9   3    3.64    0.31 
   4   9   3    3.83    0.34 
  -4  -9  -3    3.46    0.32 
  -4  -9  -3    3.42    0.35 
  -4  -9  -3    3.41    0.32 
   5   8   4   35.39    0.99 
   5   8   4   33.59    0.98 
   5   8   4   33.91    0.69 
  -5  -8  -4   35.87    1.03 
  -5  -8  -4   35.10    1.00 
  -5  -8  -4   33.65    0.98 
   6   7   5    0.35    0.16 
   6   7   5    0.30    0.15 
  -6  -7  -5    0.63    0.20 
   7   6   6    4.73    0.37 
   7   6   6    5.64    0.41 
  -7  -6  -6    4.99    0.33 
  -7  -6  -6    4.64    0.43 
   8   5   7    0.48    0.20 
   8   5   7    0.67    0.21 
  -8  -5  -7    1.03    0.20 
  -8  -5  -7    0.81    0.24 
   9   4   8    0.02    0.19 
   9   4   8    0.60    0.22 
  -9  -4  -8    0.46    0.24 
  -1 -12  -1   -0.08    0.16 
   2  11   2    1.09    0.23 
  -2 -11  -2    0.74    0.20 
   3  10   3   -0.04    0.13 
   3  10   3   -0.04    0.14 
  -3 -10  -3    0.19    0.15 
   4   9   4    0.45    0.17 
   4   9   4    0.88    0.21 
  -4  -9  -4    0.66    0.18 
  -4  -9  -4    0.79    0.23 
   5   8   5   25.27    0.83 
   5   8   5   23.66    0.81 
   5   8   5   23.73    0.58 
  -5  -8  -5   24.04    0.84 
  -5  -8  -5   23.96    0.80 
   6   7   6    0.31    0.16 
   6   7   6    0.02    0.13 
   6   7   6    0.22    0.11 
  -6  -7  -6    0.51    0.19 
   7   6   7    7.39    0.48 
   7   6   7    5.92    0.43 
  -7  -6  -7    6.91    0.48 
  -7  -6  -7    7.07    0.36 
   8   5   8    2.39    0.35 
   8   5   8    2.08    0.32 
  -8  -5  -8    2.17    0.35 
  -8  -5  -8    2.50    0.26 
   9   4   9    0.37    0.22 
   9   4   9    0.20    0.23 
  -9  -4  -9    0.17    0.22 
  -1 -12  -2    2.20    0.33 
   2  11   3    1.59    0.28 
  -2 -11  -3    1.38    0.26 
   3  10   4    2.47    0.30 
   3  10   4    3.24    0.34 
  -3 -10  -4    3.16    0.35 
   4   9   5   15.69    0.64 
   4   9   5   14.51    0.62 
  -4  -9  -5   14.88    0.67 
  -4  -9  -5   14.73    0.62 
   5   8   6    0.27    0.17 
   5   8   6    0.40    0.18 
   5   8   6    0.41    0.11 
  -5  -8  -6    0.30    0.15 
  -5  -8  -6    0.38    0.20 
   6   7   7    0.33    0.16 
   6   7   7    0.39    0.14 
   6   7   7    0.50    0.19 
  -6  -7  -7    0.16    0.17 
   7   6   8    1.55    0.27 
   7   6   8    0.92    0.23 
  -7  -6  -8    1.18    0.26 
  -7  -6  -8    1.52    0.19 
   8   5   9    0.33    0.23 
   8   5   9    0.48    0.21 
  -8  -5  -9    0.21    0.21 
  -8  -5  -9    0.43    0.24 
   9   4  10    2.56    0.38 
   9   4  10    2.39    0.40 
  -9  -4 -10    2.05    0.37 
   1  12   3    0.17    0.20 
  -1 -12  -3    0.18    0.19 
   2  11   4    1.52    0.28 
   2  11   4    1.73    0.29 
  -2 -11  -4    1.90    0.30 
   3  10   5    4.53    0.42 
   3  10   5    4.27    0.39 
  -3 -10  -5    4.51    0.41 
  -3 -10  -5    4.75    0.45 
   4   9   6    0.29    0.16 
   4   9   6    0.33    0.17 
  -4  -9  -6    0.90    0.23 
  -4  -9  -6    0.31    0.16 
   5   8   7    1.60    0.19 
   5   8   7    1.87    0.29 
   5   8   7    1.80    0.28 
  -5  -8  -7    1.81    0.29 
  -5  -8  -7    1.21    0.21 
   6   7   8    0.28    0.13 
   6   7   8    0.15    0.15 
   6   7   8    0.27    0.18 
  -6  -7  -8    0.45    0.17 
  -6  -7  -8    0.10    0.18 
   7   6   9    6.94    0.51 
   7   6   9    7.36    0.44 
   7   6   9    6.33    0.48 
  -7  -6  -9    7.02    0.31 
  -7  -6  -9    6.70    0.49 
   8   5  10    0.83    0.25 
   8   5  10    1.36    0.32 
  -8  -5 -10    1.22    0.28 
   1  12   4    1.28    0.30 
  -1 -12  -4    0.68    0.22 
   2  11   5    0.72    0.24 
   2  11   5    0.65    0.21 
  -2 -11  -5    0.23    0.18 
   3  10   6    2.45    0.32 
   3  10   6    3.17    0.36 
  -3 -10  -6    2.35    0.35 
  -3 -10  -6    2.88    0.34 
   4   9   7   16.46    0.70 
   4   9   7   16.79    0.71 
  -4  -9  -7   14.69    0.64 
  -4  -9  -7   17.06    0.72 
   5   8   8    0.50    0.21 
   5   8   8    0.62    0.15 
   5   8   8    0.60    0.21 
  -5  -8  -8    0.39    0.19 
  -5  -8  -8    0.32    0.16 
   6   7   9    0.60    0.20 
   6   7   9    0.81    0.24 
   6   7   9    0.01    0.14 
  -6  -7  -9    0.59    0.19 
  -6  -7  -9    0.30    0.20 
   7   6  10    0.31    0.18 
   7   6  10   -0.21    0.18 
   7   6  10   -0.12    0.16 
  -7  -6 -10    0.20    0.20 
   8   5  11    0.45    0.26 
   8   5  11    0.29    0.21 
  -8  -5 -11    0.57    0.25 
   1  12   5    0.17    0.22 
  -1 -12  -5   -0.01    0.18 
   2  11   6   -0.15    0.17 
   2  11   6    0.00    0.16 
  -2 -11  -6    0.03    0.21 
  -2 -11  -6    0.10    0.17 
   3  10   7    2.35    0.35 
   3  10   7    1.65    0.28 
  -3 -10  -7    1.27    0.28 
  -3 -10  -7    1.78    0.27 
   4   9   8   48.63    1.39 
   4   9   8   48.55    1.38 
  -4  -9  -8   50.03    1.40 
  -4  -9  -8   48.79    1.35 
   5   8   9    2.41    0.33 
   5   8   9    2.74    0.34 
   5   8   9    2.47    0.28 
  -5  -8  -9    2.84    0.32 
  -5  -8  -9    2.55    0.33 
   6   7  10    0.24    0.17 
   6   7  10   -0.12    0.15 
   6   7  10   -0.02    0.19 
  -6  -7 -10   -0.14    0.16 
  -6  -7 -10    0.00    0.13 
   7   6  11    1.00    0.27 
   7   6  11    0.83    0.26 
   7   6  11    1.47    0.33 
  -7  -6 -11    0.96    0.26 
   8   5  12    3.19    0.47 
   8   5  12    1.59    0.35 
  -8  -5 -12    2.30    0.39 
   1  12   6    0.17    0.21 
   1  12   6    0.60    0.27 
  -1 -12  -6    0.53    0.23 
   2  11   7    1.52    0.32 
   2  11   7    0.96    0.26 
  -2 -11  -7    0.96    0.25 
  -2 -11  -7    1.25    0.31 
   3  10   8    0.01    0.18 
   3  10   8    0.19    0.18 
  -3 -10  -8    0.61    0.20 
  -3 -10  -8    0.05    0.20 
   4   9   9    0.65    0.25 
   4   9   9    0.49    0.21 
  -4  -9  -9    0.70    0.25 
  -4  -9  -9    0.45    0.18 
   5   8  10    5.06    0.36 
   5   8  10    5.39    0.44 
   5   8  10    4.99    0.48 
  -5  -8 -10    4.72    0.45 
  -5  -8 -10    4.96    0.39 
   6   7  11   11.75    0.69 
   6   7  11   11.59    0.66 
   6   7  11   13.60    0.63 
  -6  -7 -11   12.72    0.67 
  -6  -7 -11   13.48    0.63 
   7   6  12    1.55    0.32 
   7   6  12    1.86    0.38 
   7   6  12    1.23    0.31 
  -7  -6 -12    1.19    0.30 
   1  12   7    1.28    0.31 
   1  12   7    1.17    0.31 
  -1 -12  -7    0.42    0.23 
   2  11   8    0.12    0.20 
   2  11   8    0.09    0.20 
  -2 -11  -8    0.15    0.16 
  -2 -11  -8    0.03    0.21 
   3  10   9    0.54    0.25 
   3  10   9    0.71    0.25 
  -3 -10  -9    1.41    0.30 
  -3 -10  -9    1.42    0.26 
   4   9  10    4.56    0.45 
   4   9  10    4.93    0.49 
  -4  -9 -10    5.87    0.43 
  -4  -9 -10    5.68    0.47 
   5   8  11    0.26    0.18 
   5   8  11   -0.10    0.18 
   5   8  11    0.23    0.18 
  -5  -8 -11    0.18    0.16 
  -5  -8 -11    0.04    0.16 
   6   7  12    1.97    0.35 
   6   7  12    1.83    0.31 
   6   7  12    1.95    0.35 
  -6  -7 -12    2.16    0.34 
   7   6  13   -0.14    0.25 
   7   6  13    0.97    0.30 
   7   6  13    0.76    0.26 
   1  12   8    0.05    0.23 
   1  12   8    0.31    0.24 
  -1 -12  -8    0.35    0.21 
   2  11   9   -0.08    0.17 
   2  11   9    0.03    0.22 
  -2 -11  -9    0.35    0.23 
  -2 -11  -9   -0.01    0.15 
   3  10  10    9.16    0.61 
   3  10  10    8.56    0.58 
  -3 -10 -10    8.61    0.53 
  -3 -10 -10    8.53    0.58 
   4   9  11   -0.07    0.16 
   4   9  11    0.29    0.23 
  -4  -9 -11    0.41    0.22 
  -4  -9 -11    0.31    0.18 
   5   8  12    1.00    0.27 
   5   8  12    1.01    0.29 
   5   8  12    1.28    0.26 
  -5  -8 -12    1.36    0.28 
   6   7  13    3.76    0.44 
   6   7  13    3.58    0.46 
   6   7  13    4.10    0.47 
   2  11  10   -0.20    0.17 
   2  11  10   -0.21    0.22 
  -2 -11 -10   -0.04    0.21 
   3  10  11    3.09    0.41 
   3  10  11    3.31    0.45 
  -3 -10 -11    3.15    0.42 
   4   9  12    0.01    0.21 
   4   9  12    0.02    0.19 
  -4  -9 -12   -0.05    0.19 
   5   8  13    1.40    0.33 
   5   8  13    0.89    0.28 
   5   8  13    1.28    0.29 
   2  11  11    0.18    0.23 
   2  11  11   -0.18    0.23 
   3  10  12    0.13    0.22 
   3  10  12    0.29    0.24 
  -3 -10 -12    0.16    0.25 
   4   9  13    0.13    0.23 
   4   9  13    0.35    0.22 
   4   9  13    0.07    0.21 
  -7  -7   6    0.81    0.14 
  -7  -7   6    1.20    0.16 
  -8  -6   5    0.52    0.15 
  -8  -6   5    0.83    0.28 
  -9  -5   4    0.42    0.23 
  -9  -5   4    0.59    0.19 
  -6  -8   6    1.09    0.15 
  -6  -8   6    1.26    0.17 
  -7  -7   5    5.32    0.31 
  -8  -6   4    2.24    0.25 
  -8  -6   4    1.77    0.33 
  -9  -5   3    1.85    0.27 
  -9  -5   3    1.17    0.29 
 -10  -4   2    0.23    0.26 
 -10  -4   2    0.21    0.18 
  -5  -9   6   -0.06    0.10 
  -5  -9   6    0.11    0.13 
  -6  -8   5    0.43    0.11 
  -6  -8   5    0.22    0.12 
  -7  -7   4    0.72    0.16 
  -8  -6   3    0.82    0.24 
  -8  -6   3    1.10    0.21 
  -9  -5   2    0.56    0.18 
  -9  -5   2    0.60    0.25 
 -10  -4   1    3.83    0.41 
 -10  -4   1    4.06    0.50 
  -5  -9   5    0.02    0.12 
  -5  -9   5    0.00    0.09 
  -6  -8   4    3.12    0.28 
  -6  -8   4    2.70    0.24 
  -7  -7   3    3.15    0.29 
  -8  -6   2    0.19    0.14 
  -8  -6   2    0.41    0.21 
  -9  -5   1    0.22    0.16 
  -9  -5   1    0.28    0.21 
 -10  -4   0    0.86    0.30 
 -10  -4   0    0.36    0.20 
  -4 -10   5    0.09    0.13 
  -5  -9   4    0.03    0.10 
  -5  -9   4    0.10    0.13 
  -6  -8   3    7.26    0.37 
  -6  -8   3    8.31    0.41 
  -7  -7   2    3.92    0.31 
  -8  -6   1    0.20    0.14 
  -8  -6   1    0.11    0.18 
  -9  -5   0    3.29    0.36 
  -9  -5   0    3.36    0.41 
 -10  -4  -1    0.18    0.19 
 -10  -4  -1   -0.19    0.19 
  -4 -10   4   -0.14    0.10 
  -5  -9   3    0.82    0.16 
  -5  -9   3    0.74    0.18 
  -6  -8   2    4.55    0.30 
  -6  -8   2    4.17    0.32 
  -7  -7   1    0.47    0.16 
  -8  -6   0    0.04    0.12 
  -8  -6   0   -0.17    0.15 
  -9  -5  -1    0.08    0.21 
  -9  -5  -1    0.04    0.16 
 -10  -4  -2    0.44    0.25 
 -10  -4  -2    0.37    0.22 
  -3 -11   4    1.47    0.27 
  -4 -10   3    0.08    0.13 
  -5  -9   2   -0.04    0.10 
  -5  -9   2   -0.11    0.12 
  -6  -8   1    2.18    0.26 
  -6  -8   1    1.63    0.21 
  -7  -7   0   -0.12    0.12 
  -8  -6  -1    3.39    0.35 
  -8  -6  -1    3.39    0.38 
  -9  -5  -2    0.52    0.22 
  -9  -5  -2    0.20    0.17 
 -10  -4  -3    2.29    0.38 
 -10  -4  -3    3.28    0.43 
  -3 -11   3    0.09    0.15 
  -4 -10   2    0.02    0.13 
  -5  -9   1    0.89    0.17 
  -5  -9   1    0.58    0.19 
   6   8   0   14.83    0.54 
  -6  -8   0   14.44    0.59 
  -6  -8   0   13.71    0.54 
   7   7   1    1.40    0.18 
   7   7   1    1.35    0.18 
  -7  -7  -1    1.48    0.24 
   8   6   2    1.33    0.22 
   8   6   2    1.50    0.22 
  -8  -6  -2    1.71    0.28 
  -8  -6  -2    1.10    0.22 
  -9  -5  -3    2.39    0.33 
  -9  -5  -3    2.16    0.31 
 -10  -4  -4    5.22    0.50 
 -10  -4  -4    4.64    0.48 
  -3 -11   2    0.51    0.18 
  -4 -10   1    0.63    0.18 
  -5  -9   0    0.50    0.18 
  -5  -9   0    0.81    0.18 
   6   8   1    6.89    0.35 
   6   8   1    7.11    0.34 
  -6  -8  -1    6.62    0.42 
  -6  -8  -1    7.05    0.47 
  -6  -8  -1    7.22    0.40 
   7   7   2    0.10    0.12 
   7   7   2    0.20    0.12 
  -7  -7  -2   -0.05    0.13 
  -7  -7  -2    0.26    0.13 
   8   6   3    0.09    0.13 
   8   6   3    0.14    0.14 
  -8  -6  -3   -0.01    0.15 
  -8  -6  -3    0.16    0.16 
   9   5   4    0.12    0.20 
   9   5   4    0.57    0.21 
  -9  -5  -4    0.53    0.22 
  -9  -5  -4    0.45    0.22 
 -10  -4  -5   10.39    0.67 
 -10  -4  -5   10.29    0.61 
  -3 -11   1    0.46    0.19 
  -4 -10   0    1.48    0.23 
   5   9   1   24.61    0.71 
   5   9   1   23.85    0.71 
  -5  -9  -1   24.99    0.83 
  -5  -9  -1   24.21    0.79 
   6   8   2    2.96    0.27 
   6   8   2    3.33    0.28 
  -6  -8  -2    3.05    0.33 
  -6  -8  -2    3.54    0.32 
   7   7   3    1.65    0.23 
   7   7   3    1.62    0.23 
  -7  -7  -3    1.96    0.27 
  -7  -7  -3    2.09    0.26 
   8   6   4    0.45    0.18 
   8   6   4    0.22    0.15 
  -8  -6  -4    0.24    0.18 
  -8  -6  -4    0.11    0.14 
   9   5   5    0.01    0.17 
   9   5   5    0.14    0.16 
  -9  -5  -5    0.18    0.21 
  -9  -5  -5    0.13    0.17 
 -10  -4  -6    2.25    0.38 
 -10  -4  -6    1.46    0.30 
  -2 -12   1    1.61    0.30 
  -3 -11   0    1.06    0.22 
   4  10   1    0.15    0.12 
  -4 -10  -1    0.19    0.14 
   5   9   2    3.20    0.29 
   5   9   2    3.41    0.30 
  -5  -9  -2    3.15    0.32 
  -5  -9  -2    2.89    0.29 
  -5  -9  -2    4.02    0.36 
   6   8   3    0.05    0.13 
   6   8   3   -0.15    0.09 
  -6  -8  -3   -0.13    0.11 
  -6  -8  -3   -0.12    0.15 
   7   7   4    0.03    0.13 
   7   7   4    0.00    0.13 
  -7  -7  -4    0.08    0.15 
  -7  -7  -4    0.38    0.18 
   8   6   5    5.93    0.42 
   8   6   5    5.06    0.41 
  -8  -6  -5    6.27    0.41 
  -8  -6  -5    6.27    0.46 
   9   5   6    0.14    0.18 
   9   5   6   -0.04    0.18 
  -9  -5  -6    0.08    0.17 
  -9  -5  -6    0.10    0.19 
  10   4   7    0.43    0.24 
 -10  -4  -7   -0.02    0.22 
 -10  -4  -7   -0.01    0.20 
  -2 -12   0    0.25    0.18 
  -3 -11  -1    0.13    0.15 
   4  10   2    9.15    0.46 
   4  10   2    9.89    0.47 
  -4 -10  -2   10.01    0.55 
  -4 -10  -2    9.02    0.49 
   5   9   3   19.19    0.68 
   5   9   3   19.43    0.68 
  -5  -9  -3   19.13    0.74 
  -5  -9  -3   19.39    0.70 
  -5  -9  -3   19.82    0.72 
   6   8   4    0.46    0.16 
   6   8   4    0.60    0.16 
  -6  -8  -4    0.36    0.16 
  -6  -8  -4    0.35    0.15 
  -6  -8  -4    0.10    0.18 
   7   7   5   12.07    0.56 
   7   7   5   13.22    0.58 
  -7  -7  -5   12.26    0.60 
   8   6   6    0.18    0.16 
   8   6   6    0.19    0.18 
  -8  -6  -6    0.27    0.19 
  -8  -6  -6    0.31    0.16 
   9   5   7    1.68    0.31 
   9   5   7    1.57    0.30 
  -9  -5  -7    1.69    0.31 
  -9  -5  -7    1.72    0.26 
 -10  -4  -8    0.20    0.24 
  -2 -12  -1    1.26    0.27 
   3  11   2    0.50    0.18 
  -3 -11  -2    0.66    0.19 
   4  10   3    2.87    0.31 
   4  10   3    3.19    0.32 
  -4 -10  -3    2.82    0.31 
  -4 -10  -3    4.09    0.41 
   5   9   4   18.42    0.69 
   5   9   4   17.78    0.68 
  -5  -9  -4   17.04    0.67 
  -5  -9  -4   18.13    0.73 
   6   8   5   -0.10    0.13 
   6   8   5    0.00    0.13 
  -6  -8  -5    0.31    0.17 
  -6  -8  -5   -0.03    0.11 
   7   7   6    0.87    0.21 
   7   7   6    0.61    0.20 
  -7  -7  -6    0.37    0.19 
   8   6   7    3.02    0.35 
   8   6   7    4.24    0.43 
  -8  -6  -7    2.79    0.36 
  -8  -6  -7    3.30    0.31 
   9   5   8    3.77    0.43 
   9   5   8    3.21    0.42 
  -9  -5  -8    3.16    0.32 
  -9  -5  -8    3.33    0.43 
  -2 -12  -2    0.05    0.16 
   3  11   3    0.02    0.15 
  -3 -11  -3   -0.12    0.12 
   4  10   4    0.33    0.18 
   4  10   4    0.51    0.19 
  -4 -10  -4    0.39    0.20 
  -4 -10  -4    0.19    0.15 
   5   9   5    0.43    0.17 
   5   9   5    0.26    0.07 
   5   9   5    0.72    0.19 
  -5  -9  -5    0.74    0.22 
  -5  -9  -5    0.54    0.16 
   6   8   6   -0.06    0.08 
   6   8   6   -0.15    0.12 
   6   8   6   -0.15    0.13 
  -6  -8  -6    0.08    0.17 
  -6  -8  -6   -0.05    0.12 
   7   7   7    8.10    0.49 
   7   7   7    8.08    0.51 
  -7  -7  -7    8.18    0.52 
   8   6   8   -0.08    0.18 
   8   6   8    0.10    0.16 
  -8  -6  -8   -0.24    0.16 
  -8  -6  -8   -0.01    0.12 
   9   5   9    1.24    0.31 
   9   5   9    1.38    0.32 
  -9  -5  -9    1.50    0.32 
   2  12   3    0.05    0.28 
  -2 -12  -3    0.49    0.20 
   3  11   4    2.42    0.32 
   3  11   4    1.94    0.31 
  -3 -11  -4    1.43    0.26 
   4  10   5    6.31    0.43 
   4  10   5    5.44    0.42 
  -4 -10  -5    5.04    0.39 
  -4 -10  -5    5.92    0.47 
   5   9   6    8.84    0.34 
   5   9   6    9.64    0.52 
   5   9   6    8.64    0.51 
  -5  -9  -6    9.19    0.54 
  -5  -9  -6   10.29    0.52 
   6   8   7    0.79    0.21 
   6   8   7    0.91    0.23 
   6   8   7    0.94    0.16 
  -6  -8  -7    0.75    0.23 
  -6  -8  -7    0.86    0.20 
   7   7   8   -0.07    0.16 
   7   7   8   -0.25    0.12 
   7   7   8    0.26    0.17 
  -7  -7  -8    0.18    0.12 
  -7  -7  -8    0.16    0.19 
   8   6   9    6.00    0.51 
   8   6   9    6.19    0.49 
  -8  -6  -9    6.52    0.51 
  -8  -6  -9    5.38    0.32 
   9   5  10    0.07    0.22 
   9   5  10    0.10    0.24 
  -9  -5 -10   -0.02    0.21 
   2  12   4    0.16    0.20 
  -2 -12  -4    0.04    0.17 
   3  11   5    0.12    0.16 
   3  11   5    0.09    0.17 
  -3 -11  -5   -0.04    0.20 
  -3 -11  -5   -0.02    0.14 
   4  10   6    1.43    0.25 
   4  10   6    1.26    0.26 
  -4 -10  -6    0.83    0.24 
  -4 -10  -6    0.72    0.19 
   5   9   7    4.88    0.28 
   5   9   7    5.04    0.40 
   5   9   7    4.28    0.42 
  -5  -9  -7    4.54    0.40 
  -5  -9  -7    5.13    0.47 
   6   8   8    1.75    0.28 
   6   8   8    1.43    0.21 
   6   8   8    2.27    0.33 
  -6  -8  -8    1.66    0.28 
  -6  -8  -8    2.21    0.32 
   7   7   9    7.45    0.51 
   7   7   9    7.65    0.54 
   7   7   9    7.16    0.44 
  -7  -7  -9    7.70    0.35 
  -7  -7  -9    8.98    0.57 
   8   6  10    0.27    0.19 
   8   6  10    0.12    0.20 
  -8  -6 -10    0.18    0.20 
   2  12   5    0.00    0.19 
  -2 -12  -5    0.11    0.16 
   3  11   6   -0.22    0.14 
   3  11   6    0.10    0.19 
  -3 -11  -6   -0.20    0.12 
  -3 -11  -6    0.20    0.21 
   4  10   7    0.38    0.18 
   4  10   7    0.19    0.19 
  -4 -10  -7    0.45    0.22 
  -4 -10  -7    0.22    0.15 
   5   9   8    8.33    0.39 
   5   9   8    7.97    0.52 
   5   9   8    8.33    0.53 
  -5  -9  -8    8.60    0.56 
  -5  -9  -8    8.66    0.51 
   6   8   9    2.77    0.35 
   6   8   9    2.60    0.29 
   6   8   9    2.37    0.35 
  -6  -8  -9    2.28    0.34 
  -6  -8  -9    2.49    0.33 
   7   7  10    2.92    0.38 
   7   7  10    2.69    0.33 
   7   7  10    3.24    0.41 
  -7  -7 -10    3.31    0.36 
  -7  -7 -10    3.44    0.41 
   8   6  11    2.85    0.40 
   8   6  11    2.94    0.44 
  -8  -6 -11    2.12    0.35 
   2  12   6    0.60    0.24 
   2  12   6    0.96    0.27 
  -2 -12  -6    0.70    0.22 
  -2 -12  -6    0.37    0.26 
   3  11   7   -0.07    0.17 
   3  11   7    0.01    0.19 
  -3 -11  -7   -0.11    0.15 
  -3 -11  -7   -0.16    0.18 
   4  10   8    0.31    0.20 
   4  10   8    0.62    0.24 
  -4 -10  -8    0.89    0.22 
  -4 -10  -8    0.97    0.26 
   5   9   9    1.61    0.31 
   5   9   9    1.91    0.31 
   5   9   9    1.88    0.24 
  -5  -9  -9    1.08    0.22 
  -5  -9  -9    1.07    0.26 
   6   8  10    0.34    0.18 
   6   8  10    0.07    0.19 
   6   8  10    0.20    0.22 
  -6  -8 -10    0.57    0.24 
  -6  -8 -10    0.32    0.15 
   7   7  11    0.90    0.28 
   7   7  11    0.69    0.24 
   7   7  11    0.49    0.22 
  -7  -7 -11    0.88    0.27 
  -7  -7 -11    0.79    0.22 
   8   6  12    4.52    0.51 
   8   6  12    4.28    0.53 
  -8  -6 -12    3.92    0.47 
   2  12   7    0.46    0.25 
   2  12   7    0.03    0.19 
  -2 -12  -7    0.28    0.25 
  -2 -12  -7   -0.05    0.16 
   3  11   8   -0.02    0.18 
   3  11   8    0.36    0.22 
  -3 -11  -8    0.14    0.21 
  -3 -11  -8    0.17    0.16 
   4  10   9    0.59    0.23 
   4  10   9    0.84    0.24 
  -4 -10  -9    0.77    0.22 
  -4 -10  -9    0.52    0.23 
   5   9  10    0.37    0.18 
   5   9  10    0.09    0.22 
   5   9  10    0.35    0.21 
  -5  -9 -10    0.31    0.21 
  -5  -9 -10    0.05    0.15 
   6   8  11    1.68    0.31 
   6   8  11    1.41    0.32 
   6   8  11    1.48    0.26 
  -6  -8 -11    1.57    0.30 
  -6  -8 -11    1.04    0.23 
   7   7  12    1.98    0.37 
   7   7  12    1.45    0.31 
   7   7  12    1.84    0.34 
  -7  -7 -12    1.23    0.29 
   2  12   8   -0.15    0.20 
   2  12   8   -0.26    0.21 
  -2 -12  -8   -0.14    0.23 
  -2 -12  -8    0.09    0.17 
   3  11   9   -0.12    0.20 
   3  11   9    0.33    0.21 
  -3 -11  -9    0.22    0.18 
  -3 -11  -9    0.54    0.26 
   4  10  10    2.20    0.36 
   4  10  10    2.04    0.37 
  -4 -10 -10    2.28    0.33 
  -4 -10 -10    2.08    0.35 
   5   9  11    1.88    0.29 
   5   9  11    1.38    0.31 
   5   9  11    1.37    0.29 
  -5  -9 -11    1.57    0.32 
  -5  -9 -11    1.45    0.27 
   6   8  12    0.09    0.17 
   6   8  12    0.10    0.23 
   6   8  12    0.00    0.18 
  -6  -8 -12   -0.16    0.18 
   7   7  13    0.14    0.23 
   7   7  13    0.39    0.23 
   7   7  13    0.16    0.24 
   2  12   9   -0.02    0.22 
   2  12   9    0.06    0.22 
  -2 -12  -9   -0.06    0.23 
  -2 -12  -9   -0.18    0.16 
   3  11  10   -0.09    0.18 
   3  11  10   -0.45    0.19 
  -3 -11 -10   -0.30    0.17 
  -3 -11 -10   -0.06    0.17 
   4  10  11    0.62    0.24 
   4  10  11    0.10    0.23 
  -4 -10 -11    0.51    0.25 
  -4 -10 -11    0.45    0.22 
   5   9  12   -0.07    0.17 
   5   9  12    0.20    0.20 
   5   9  12    0.04    0.21 
  -5  -9 -12    0.23    0.21 
   6   8  13    0.16    0.24 
   6   8  13    0.20    0.20 
   6   8  13    0.22    0.20 
   3  11  11    0.19    0.24 
   3  11  11    0.11    0.22 
  -3 -11 -11    0.20    0.25 
   4  10  12    1.22    0.34 
   4  10  12    1.17    0.29 
  -4 -10 -12    0.65    0.27 
   5   9  13    0.11    0.20 
   5   9  13   -0.05    0.23 
   5   9  13    0.33    0.22 
  -8  -7   5    0.22    0.13 
  -8  -7   5    0.34    0.22 
  -9  -6   4    0.66    0.19 
  -9  -6   4    0.53    0.28 
  -7  -8   5    0.21    0.11 
  -7  -8   5   -0.05    0.09 
  -8  -7   4    7.72    0.41 
  -8  -7   4    6.90    0.55 
  -9  -6   3    0.49    0.23 
  -9  -6   3    0.47    0.18 
 -10  -5   2    0.03    0.22 
 -10  -5   2   -0.01    0.16 
  -6  -9   5    1.48    0.20 
  -6  -9   5    1.91    0.23 
  -7  -8   4    0.06    0.10 
  -7  -8   4   -0.02    0.11 
  -8  -7   3    0.35    0.14 
  -9  -6   2   -0.02    0.19 
  -9  -6   2   -0.09    0.12 
 -10  -5   1    3.17    0.46 
 -10  -5   1    3.38    0.40 
  -5 -10   5   -0.08    0.11 
  -6  -9   4    0.93    0.17 
  -6  -9   4    1.00    0.20 
  -7  -8   3    1.44    0.21 
  -8  -7   2    1.72    0.25 
  -9  -6   1    0.14    0.14 
  -9  -6   1    0.30    0.22 
 -10  -5   0    0.10    0.17 
 -10  -5   0    0.18    0.22 
  -5 -10   4    0.43    0.15 
  -5 -10   4    0.41    0.17 
  -6  -9   3    3.68    0.33 
  -6  -9   3    2.86    0.28 
  -7  -8   2    2.58    0.28 
  -8  -7   1   -0.23    0.10 
  -9  -6   0    2.85    0.33 
  -9  -6   0    2.96    0.40 
 -10  -5  -1    0.58    0.26 
 -10  -5  -1    0.23    0.19 
  -5 -10   3    0.32    0.14 
  -5 -10   3    0.66    0.19 
  -6  -9   2    0.13    0.14 
  -6  -9   2    0.05    0.11 
  -7  -8   1    4.53    0.35 
  -8  -7   0    0.12    0.14 
  -9  -6  -1    0.31    0.19 
  -9  -6  -1    0.80    0.26 
 -10  -5  -2   -0.11    0.17 
 -10  -5  -2   -0.09    0.16 
  -4 -11   3   -0.07    0.13 
  -5 -10   2    0.00    0.15 
  -5 -10   2   -0.23    0.10 
  -6  -9   1    0.61    0.16 
  -6  -9   1    0.80    0.20 
  -7  -8   0    1.04    0.21 
  -8  -7  -1    0.65    0.19 
  -9  -6  -2    0.62    0.22 
  -9  -6  -2    0.90    0.25 
 -10  -5  -3    0.24    0.21 
 -10  -5  -3    0.33    0.23 
  -4 -11   2    0.35    0.16 
  -5 -10   1    0.81    0.18 
  -5 -10   1    0.81    0.22 
  -6  -9   0   32.88    0.96 
  -6  -9   0   34.02    1.01 
  -7  -8  -1    2.75    0.31 
   8   7   2    0.99    0.18 
  -8  -7  -2    1.07    0.23 
   9   6   3    4.21    0.38 
  -9  -6  -3    4.62    0.45 
  -9  -6  -3    4.33    0.41 
 -10  -5  -4    0.17    0.22 
 -10  -5  -4    0.28    0.21 
  -4 -11   1    1.02    0.21 
  -5 -10   0    1.30    0.23 
  -5 -10   0    1.42    0.26 
  -6  -9  -1    7.65    0.47 
  -6  -9  -1    6.91    0.41 
   7   8   2    0.04    0.11 
   7   8   2   -0.10    0.08 
  -7  -8  -2   -0.03    0.15 
   8   7   3    2.75    0.30 
   8   7   3    2.37    0.32 
  -8  -7  -3    2.17    0.29 
   9   6   4    1.01    0.23 
  -9  -6  -4    0.80    0.22 
  -9  -6  -4    1.22    0.28 
 -10  -5  -5    0.53    0.24 
 -10  -5  -5    0.49    0.25 
  -3 -12   1    1.32    0.27 
  -4 -11   0    0.84    0.21 
  -5 -10  -1    0.96    0.23 
  -5 -10  -1    0.66    0.18 
   6   9   2   28.25    0.82 
  -6  -9  -2   27.55    0.88 
  -6  -9  -2   27.30    0.92 
   7   8   3    0.96    0.19 
   7   8   3    0.63    0.16 
  -7  -8  -3    0.67    0.20 
   8   7   4    0.64    0.20 
   8   7   4    0.62    0.19 
  -8  -7  -4    0.42    0.21 
   9   6   5    0.72    0.22 
   9   6   5    0.29    0.17 
  -9  -6  -5    0.76    0.25 
  -9  -6  -5    0.79    0.21 
  10   5   6    0.37    0.22 
 -10  -5  -6    0.67    0.27 
 -10  -5  -6    0.36    0.22 
  -3 -12   0   -0.04    0.14 
  -4 -11  -1    0.32    0.16 
   5  10   2    0.86    0.18 
  -5 -10  -2    0.66    0.22 
  -5 -10  -2    0.56    0.17 
   6   9   3    0.73    0.17 
   6   9   3    0.79    0.19 
  -6  -9  -3    1.20    0.25 
  -6  -9  -3    0.78    0.19 
   7   8   4    0.09    0.13 
   7   8   4    0.03    0.13 
  -7  -8  -4    0.14    0.18 
   8   7   5    5.86    0.42 
   8   7   5    5.95    0.42 
  -8  -7  -5    7.00    0.49 
  -8  -7  -5    6.69    0.42 
   9   6   6    0.35    0.19 
   9   6   6    0.23    0.19 
  -9  -6  -6    0.83    0.27 
  -9  -6  -6    0.42    0.19 
  10   5   7    0.77    0.28 
 -10  -5  -7    0.69    0.28 
 -10  -5  -7    0.51    0.23 
  -3 -12  -1    0.22    0.16 
  -4 -11  -2    0.29    0.16 
   5  10   3    0.20    0.15 
   5  10   3    0.27    0.16 
  -5 -10  -3    0.04    0.13 
  -5 -10  -3    0.27    0.20 
   6   9   4    2.08    0.27 
   6   9   4    2.05    0.26 
  -6  -9  -4    1.88    0.26 
  -6  -9  -4    1.98    0.31 
   7   8   5    2.11    0.28 
   7   8   5    2.27    0.30 
  -7  -8  -5    2.37    0.31 
   8   7   6   10.01    0.55 
   8   7   6   10.01    0.56 
  -8  -7  -6   10.26    0.60 
  -8  -7  -6   10.28    0.50 
   9   6   7    1.37    0.31 
   9   6   7    1.30    0.26 
  -9  -6  -7    1.21    0.24 
  -9  -6  -7    1.41    0.31 
  10   5   8    0.52    0.26 
 -10  -5  -8    0.23    0.24 
  -3 -12  -2    0.11    0.16 
   4  11   3    0.17    0.17 
  -4 -11  -3   -0.13    0.12 
  -4 -11  -3   -0.10    0.19 
   5  10   4    1.69    0.26 
   5  10   4    1.21    0.23 
  -5 -10  -4    1.51    0.28 
  -5 -10  -4    1.49    0.25 
   6   9   5    1.24    0.23 
   6   9   5    1.34    0.24 
  -6  -9  -5    1.54    0.26 
  -6  -9  -5    1.32    0.26 
   7   8   6    1.80    0.28 
   7   8   6    1.89    0.28 
  -7  -8  -6    1.14    0.26 
   8   7   7    0.58    0.21 
   8   7   7    0.40    0.20 
  -8  -7  -7    0.74    0.19 
  -8  -7  -7    1.10    0.28 
   9   6   8    0.41    0.22 
   9   6   8    0.22    0.19 
  -9  -6  -8    0.34    0.18 
  -9  -6  -8    0.51    0.24 
  -3 -12  -3    0.55    0.21 
   4  11   4    0.26    0.18 
   4  11   4    0.33    0.25 
  -4 -11  -4    0.22    0.22 
  -4 -11  -4   -0.01    0.15 
   5  10   5    1.05    0.23 
   5  10   5    1.08    0.23 
   5  10   5    0.99    0.10 
  -5 -10  -5    0.96    0.26 
  -5 -10  -5    1.10    0.22 
   6   9   6    1.66    0.29 
   6   9   6    1.55    0.15 
   6   9   6    1.56    0.25 
  -6  -9  -6    1.35    0.27 
  -6  -9  -6    1.35    0.23 
   7   8   7    1.04    0.24 
   7   8   7    1.10    0.25 
  -7  -8  -7    1.08    0.25 
   8   7   8    3.15    0.39 
   8   7   8    2.90    0.36 
  -8  -7  -8    2.95    0.40 
  -8  -7  -8    3.06    0.29 
   9   6   9    1.23    0.32 
   9   6   9    1.01    0.27 
  -9  -6  -9    0.93    0.30 
   3  12   4    0.08    0.20 
  -3 -12  -4    0.38    0.18 
   4  11   5    0.35    0.19 
   4  11   5    0.18    0.16 
  -4 -11  -5    0.06    0.14 
  -4 -11  -5   -0.14    0.18 
   5  10   6    0.14    0.08 
   5  10   6    0.20    0.17 
   5  10   6    0.19    0.17 
  -5 -10  -6   -0.08    0.17 
  -5 -10  -6   -0.10    0.13 
   6   9   7    0.50    0.20 
   6   9   7    0.57    0.19 
   6   9   7    0.52    0.13 
  -6  -9  -7    0.61    0.19 
  -6  -9  -7    0.45    0.21 
   7   8   8    0.04    0.17 
   7   8   8   -0.02    0.13 
   7   8   8    0.23    0.17 
  -7  -8  -8    0.33    0.16 
  -7  -8  -8   -0.10    0.17 
   8   7   9    0.66    0.24 
   8   7   9    0.53    0.23 
  -8  -7  -9    0.73    0.26 
  -8  -7  -9    1.05    0.18 
   9   6  10    1.91    0.35 
   9   6  10    2.17    0.40 
  -9  -6 -10    1.83    0.36 
   3  12   5    0.16    0.21 
  -3 -12  -5   -0.02    0.16 
  -3 -12  -5    0.10    0.22 
   4  11   6    0.90    0.25 
   4  11   6    0.29    0.20 
  -4 -11  -6    0.67    0.21 
  -4 -11  -6    0.75    0.26 
   5  10   7    2.09    0.32 
   5  10   7    1.77    0.20 
   5  10   7    1.97    0.30 
  -5 -10  -7    1.99    0.33 
  -5 -10  -7    1.80    0.28 
   6   9   8    0.23    0.17 
   6   9   8    0.43    0.23 
   6   9   8    0.60    0.15 
  -6  -9  -8    0.40    0.17 
  -6  -9  -8    0.37    0.21 
   7   8   9    4.01    0.35 
   7   8   9    3.95    0.42 
   7   8   9    4.01    0.45 
  -7  -8  -9    4.10    0.42 
  -7  -8  -9    4.53    0.46 
   8   7  10    0.25    0.20 
   8   7  10    0.65    0.26 
  -8  -7 -10    0.13    0.21 
   3  12   6    0.23    0.20 
  -3 -12  -6    0.22    0.23 
  -3 -12  -6   -0.07    0.15 
   4  11   7    1.84    0.31 
   4  11   7    1.85    0.32 
  -4 -11  -7    2.43    0.34 
  -4 -11  -7    1.32    0.32 
   5  10   8    0.63    0.24 
   5  10   8    0.81    0.23 
   5  10   8    0.63    0.15 
  -5 -10  -8    0.55    0.20 
  -5 -10  -8    0.41    0.22 
   6   9   9    4.90    0.34 
   6   9   9    4.24    0.45 
   6   9   9    4.73    0.46 
  -6  -9  -9    5.13    0.49 
  -6  -9  -9    4.67    0.43 
   7   8  10   -0.08    0.16 
   7   8  10    0.07    0.18 
   7   8  10    0.20    0.19 
  -7  -8 -10    0.20    0.21 
  -7  -8 -10   -0.07    0.13 
   8   7  11   -0.28    0.19 
   8   7  11   -0.34    0.17 
   8   7  11    0.01    0.19 
  -8  -7 -11    0.00    0.19 
   3  12   7   -0.02    0.19 
   3  12   7   -0.19    0.19 
  -3 -12  -7    0.36    0.20 
  -3 -12  -7    0.28    0.25 
   4  11   8    0.19    0.18 
   4  11   8    0.16    0.21 
  -4 -11  -8   -0.13    0.19 
  -4 -11  -8   -0.05    0.15 
   5  10   9    0.50    0.22 
   5  10   9    0.74    0.18 
   5  10   9    0.92    0.27 
  -5 -10  -9    0.66    0.26 
  -5 -10  -9    0.64    0.20 
   6   9  10    0.63    0.23 
   6   9  10    0.65    0.19 
   6   9  10    1.00    0.29 
  -6  -9 -10    0.76    0.21 
  -6  -9 -10    0.67    0.25 
   7   8  11   -0.08    0.21 
   7   8  11    0.25    0.19 
   7   8  11    0.19    0.21 
  -7  -8 -11    0.32    0.22 
  -7  -8 -11    0.10    0.16 
   8   7  12    0.29    0.26 
   8   7  12    0.78    0.27 
   8   7  12    0.32    0.27 
   3  12   8    0.55    0.24 
   3  12   8    0.49    0.26 
  -3 -12  -8    0.57    0.26 
  -3 -12  -8    0.57    0.23 
   4  11   9    0.58    0.24 
   4  11   9    1.32    0.32 
  -4 -11  -9    0.80    0.27 
  -4 -11  -9    0.67    0.23 
   5  10  10    1.60    0.33 
   5  10  10    1.54    0.25 
   5  10  10    1.53    0.31 
  -5 -10 -10    1.38    0.31 
  -5 -10 -10    1.08    0.24 
   6   9  11    2.40    0.31 
   6   9  11    2.46    0.37 
   6   9  11    2.15    0.37 
  -6  -9 -11    2.52    0.38 
  -6  -9 -11    2.70    0.36 
   7   8  12   -0.04    0.20 
   7   8  12    0.24    0.22 
   7   8  12   -0.13    0.17 
  -7  -8 -12    0.33    0.23 
   3  12   9    0.16    0.23 
   3  12   9    0.21    0.26 
  -3 -12  -9    0.25    0.27 
  -3 -12  -9    0.91    0.26 
   4  11  10    0.30    0.21 
   4  11  10   -0.02    0.22 
  -4 -11 -10   -0.07    0.14 
  -4 -11 -10    0.08    0.21 
   5  10  11    1.99    0.35 
   5  10  11    2.19    0.31 
   5  10  11    1.62    0.33 
  -5 -10 -11    2.49    0.35 
  -5 -10 -11    2.03    0.35 
   6   9  12    0.87    0.29 
   6   9  12    0.61    0.23 
   6   9  12    0.45    0.21 
  -6  -9 -12    0.65    0.27 
   4  11  11    2.86    0.44 
   4  11  11    2.54    0.40 
  -4 -11 -11    2.67    0.42 
   5  10  12    0.67    0.28 
   5  10  12    0.97    0.29 
   5  10  12    1.47    0.30 
  -5 -10 -12    0.99    0.29 
  -8  -8   4    0.69    0.18 
  -9  -7   3    0.26    0.16 
  -9  -7   3    0.77    0.27 
  -7  -9   4    0.24    0.12 
  -7  -9   4    0.24    0.15 
  -8  -8   3    2.12    0.26 
  -9  -7   2   -0.11    0.14 
  -9  -7   2    0.03    0.21 
 -10  -6   1    0.78    0.23 
 -10  -6   1    0.63    0.27 
  -6 -10   4    0.00    0.14 
  -6 -10   4    0.06    0.12 
  -7  -9   3   -0.16    0.10 
  -7  -9   3    0.15    0.13 
  -8  -8   2   -0.10    0.12 
  -9  -7   1    0.16    0.15 
  -9  -7   1    0.28    0.23 
 -10  -6   0    0.00    0.23 
 -10  -6   0    0.57    0.21 
  -6 -10   3    0.09    0.12 
  -6 -10   3    0.02    0.15 
  -7  -9   2    0.34    0.14 
  -7  -9   2    0.40    0.17 
  -8  -8   1    0.23    0.16 
  -9  -7   0    0.25    0.17 
  -9  -7   0   -0.05    0.18 
 -10  -6  -1    2.36    0.34 
 -10  -6  -1    2.55    0.40 
  -5 -11   3   -0.07    0.13 
  -5 -11   3   -0.14    0.16 
  -6 -10   2    0.07    0.12 
  -6 -10   2    0.29    0.17 
  -7  -9   1    0.48    0.15 
  -7  -9   1    0.56    0.18 
  -8  -8   0    0.32    0.18 
  -9  -7  -1   -0.01    0.17 
  -9  -7  -1    0.03    0.15 
 -10  -6  -2    0.22    0.21 
 -10  -6  -2    0.36    0.21 
  -5 -11   2    1.27    0.27 
  -5 -11   2    1.26    0.24 
  -6 -10   1    0.12    0.15 
  -6 -10   1    0.20    0.14 
  -7  -9   0    2.48    0.28 
  -7  -9   0    3.07    0.34 
  -8  -8  -1    0.28    0.17 
  -9  -7  -2    0.29    0.21 
  -9  -7  -2    0.27    0.19 
 -10  -6  -3    0.22    0.19 
 -10  -6  -3    0.19    0.21 
  -5 -11   1    0.33    0.20 
  -5 -11   1    0.10    0.14 
  -6 -10   0    0.29    0.18 
  -6 -10   0    0.29    0.15 
  -7  -9  -1    0.34    0.14 
  -7  -9  -1    0.31    0.18 
  -8  -8  -2    3.86    0.38 
  -9  -7  -3   -0.08    0.14 
  -9  -7  -3   -0.10    0.16 
 -10  -6  -4    0.23    0.21 
 -10  -6  -4    0.21    0.21 
  -4 -12   1    0.05    0.15 
  -5 -11   0   -0.16    0.16 
  -5 -11   0    0.08    0.14 
  -6 -10  -1    5.25    0.38 
  -6 -10  -1    5.24    0.43 
  -7  -9  -2    4.35    0.34 
  -7  -9  -2    4.19    0.39 
   8   8   3   -0.15    0.11 
  -8  -8  -3    0.04    0.16 
   9   7   4    0.92    0.23 
  -9  -7  -4    0.69    0.23 
  -9  -7  -4    0.50    0.21 
  10   6   5    0.29    0.22 
 -10  -6  -5    0.09    0.19 
 -10  -6  -5    0.58    0.25 
  -4 -12   0    0.94    0.23 
  -5 -11  -1    0.07    0.18 
  -5 -11  -1    0.20    0.14 
  -6 -10  -2    1.78    0.29 
  -6 -10  -2    0.93    0.21 
   7   9   3    0.56    0.17 
  -7  -9  -3    0.58    0.20 
  -7  -9  -3    0.32    0.15 
   8   8   4    1.38    0.25 
  -8  -8  -4    0.95    0.25 
   9   7   5    0.20    0.18 
  -9  -7  -5    0.23    0.21 
  -9  -7  -5    0.57    0.21 
  10   6   6    0.76    0.26 
 -10  -6  -6    1.02    0.25 
 -10  -6  -6    0.93    0.29 
  -4 -12  -1    0.02    0.15 
  -5 -11  -2    0.53    0.23 
  -5 -11  -2    0.56    0.19 
   6  10   3    1.20    0.21 
  -6 -10  -3    1.34    0.24 
  -6 -10  -3    1.57    0.29 
   7   9   4    1.16    0.23 
   7   9   4    1.69    0.26 
  -7  -9  -4    0.83    0.20 
  -7  -9  -4    1.06    0.24 
   8   8   5    0.17    0.15 
   8   8   5   -0.06    0.15 
  -8  -8  -5    0.10    0.17 
   9   7   6    1.34    0.28 
   9   7   6    1.48    0.41 
  -9  -7  -6    1.59    0.26 
  -9  -7  -6    1.44    0.31 
  10   6   7    2.99    0.43 
 -10  -6  -7    3.28    0.37 
 -10  -6  -7    3.29    0.46 
  -4 -12  -2    0.96    0.24 
   5  11   3    1.02    0.34 
  -5 -11  -3    0.71    0.19 
  -5 -11  -3    1.05    0.29 
   6  10   4    2.76    0.37 
   6  10   4    2.37    0.30 
  -6 -10  -4    1.69    0.25 
  -6 -10  -4    2.28    0.34 
   7   9   5    0.05    0.15 
   7   9   5   -0.22    0.11 
  -7  -9  -5    0.01    0.18 
  -7  -9  -5    0.07    0.14 
   8   8   6    0.25    0.17 
   8   8   6    0.33    0.17 
  -8  -8  -6    0.31    0.20 
   9   7   7    2.55    0.35 
   9   7   7    2.22    0.34 
  -9  -7  -7    2.40    0.31 
  -9  -7  -7    2.80    0.40 
  10   6   8    0.32    0.25 
 -10  -6  -8   -0.14    0.19 
 -10  -6  -8    0.02    0.21 
  -4 -12  -3    0.56    0.20 
  -4 -12  -3    0.35    0.24 
   5  11   4    1.25    0.24 
  -5 -11  -4    2.08    0.30 
  -5 -11  -4    1.94    0.32 
   6  10   5    2.06    0.30 
   6  10   5    2.02    0.29 
  -6 -10  -5    1.53    0.25 
  -6 -10  -5    2.28    0.33 
   7   9   6    0.12    0.15 
   7   9   6    0.01    0.16 
  -7  -9  -6    0.13    0.18 
  -7  -9  -6    0.22    0.16 
   8   8   7   -0.10    0.15 
   8   8   7   -0.16    0.14 
  -8  -8  -7    0.21    0.21 
   9   7   8    0.12    0.18 
   9   7   8    0.06    0.19 
  -9  -7  -8    0.40    0.24 
  -9  -7  -8    0.35    0.17 
  -3 -13  -3    1.64    0.31 
   4  12   4    1.54    0.34 
  -4 -12  -4    1.56    0.33 
  -4 -12  -4    1.78    0.31 
   5  11   5    0.38    0.20 
   5  11   5    0.86    0.27 
  -5 -11  -5    0.13    0.21 
  -5 -11  -5    0.61    0.21 
   6  10   6    1.17    0.25 
   6  10   6    1.83    0.28 
  -6 -10  -6    1.55    0.30 
  -6 -10  -6    1.39    0.25 
   7   9   7    1.38    0.27 
   7   9   7    0.98    0.25 
  -7  -9  -7    1.28    0.28 
  -7  -9  -7    1.74    0.27 
   8   8   8    0.24    0.20 
   8   8   8    0.14    0.18 
  -8  -8  -8    0.16    0.14 
  -8  -8  -8   -0.11    0.18 
   9   7   9    0.36    0.24 
   9   7   9    0.81    0.26 
  -9  -7  -9    0.43    0.24 
  -3 -13  -4   -0.07    0.16 
   4  12   5    0.78    0.25 
  -4 -12  -5    1.20    0.31 
  -4 -12  -5    0.50    0.19 
   5  11   6   -0.08    0.16 
   5  11   6    0.20    0.17 
  -5 -11  -6    0.14    0.21 
  -5 -11  -6   -0.17    0.13 
   6  10   7    1.57    0.28 
   6  10   7    1.49    0.17 
   6  10   7    1.34    0.25 
  -6 -10  -7    1.82    0.33 
  -6 -10  -7    1.41    0.25 
   7   9   8    0.18    0.13 
   7   9   8    0.32    0.18 
   7   9   8    0.08    0.18 
  -7  -9  -8    0.30    0.18 
  -7  -9  -8    0.15    0.21 
   8   8   9    0.32    0.20 
   8   8   9    0.35    0.22 
  -8  -8  -9    0.40    0.15 
  -8  -8  -9    0.69    0.26 
   9   7  10    0.41    0.25 
   9   7  10    0.20    0.22 
  -9  -7 -10    0.43    0.26 
  -3 -13  -5   -0.11    0.17 
  -3 -13  -5    0.10    0.27 
   4  12   6    0.02    0.19 
  -4 -12  -6    0.17    0.23 
  -4 -12  -6    0.00    0.17 
   5  11   7    3.46    0.40 
   5  11   7    3.12    0.38 
  -5 -11  -7    4.29    0.46 
  -5 -11  -7    3.85    0.41 
   6  10   8    0.51    0.23 
   6  10   8    0.32    0.19 
   6  10   8    0.61    0.15 
  -6 -10  -8    0.70    0.25 
  -6 -10  -8    0.45    0.19 
   7   9   9    1.26    0.28 
   7   9   9    1.62    0.23 
   7   9   9    1.12    0.26 
  -7  -9  -9    1.07    0.25 
  -7  -9  -9    1.97    0.35 
   8   8  10    0.56    0.27 
   8   8  10    0.89    0.28 
  -8  -8 -10    0.97    0.29 
  -8  -8 -10    1.54    0.29 
   3  13   6    2.56    0.40 
  -3 -13  -6    2.64    0.40 
   4  12   7    0.18    0.21 
   4  12   7    0.34    0.22 
  -4 -12  -7    0.24    0.25 
  -4 -12  -7    0.07    0.16 
   5  11   8    0.65    0.24 
   5  11   8    0.36    0.13 
   5  11   8    0.52    0.24 
  -5 -11  -8    0.36    0.18 
  -5 -11  -8    0.79    0.27 
   6  10   9    0.05    0.12 
   6  10   9   -0.16    0.18 
   6  10   9   -0.02    0.15 
  -6 -10  -9    0.16    0.20 
  -6 -10  -9   -0.17    0.13 
   7   9  10   -0.03    0.20 
   7   9  10    0.13    0.15 
   7   9  10   -0.12    0.17 
  -7  -9 -10    0.13    0.16 
  -7  -9 -10    0.10    0.21 
   8   8  11   -0.41    0.19 
   8   8  11   -0.31    0.21 
   8   8  11    0.13    0.23 
  -8  -8 -11    0.02    0.22 
  -8  -8 -11   -0.07    0.15 
   4  12   8    0.96    0.29 
   4  12   8    0.42    0.25 
  -4 -12  -8    0.54    0.27 
  -4 -12  -8    0.46    0.22 
   5  11   9    4.28    0.46 
   5  11   9    5.14    0.50 
   5  11   9    4.42    0.32 
  -5 -11  -9    3.72    0.45 
  -5 -11  -9    4.97    0.46 
   6  10  10    0.16    0.14 
   6  10  10   -0.04    0.20 
   6  10  10    0.13    0.18 
  -6 -10 -10    0.02    0.15 
  -6 -10 -10    0.07    0.22 
   7   9  11   -0.01    0.16 
   7   9  11    0.44    0.23 
   7   9  11    0.36    0.26 
  -7  -9 -11    0.06    0.16 
  -7  -9 -11    0.05    0.21 
   4  12   9    0.12    0.21 
   4  12   9   -0.12    0.21 
  -4 -12  -9    0.12    0.17 
  -4 -12  -9    0.06    0.23 
   5  11  10    0.27    0.23 
   5  11  10   -0.02    0.19 
   5  11  10    0.30    0.16 
  -5 -11 -10   -0.21    0.16 
  -5 -11 -10    0.24    0.24 
   6  10  11    0.11    0.16 
   6  10  11    0.02    0.22 
   6  10  11    0.10    0.20 
  -6 -10 -11    0.63    0.26 
  -6 -10 -11    0.37    0.20 
   7   9  12    0.06    0.22 
   7   9  12    0.08    0.18 
   7   9  12    0.10    0.20 
  -7  -9 -12    0.26    0.23 
   4  12  10    0.13    0.23 
   4  12  10   -0.26    0.22 
  -4 -12 -10    0.02    0.19 
   5  11  11    1.31    0.33 
   5  11  11    1.41    0.26 
   5  11  11    2.08    0.41 
  -5 -11 -11    1.54    0.36 
  -5 -11 -11    1.90    0.38 
   6  10  12    0.07    0.24 
   6  10  12    0.45    0.24 
   6  10  12   -0.01    0.17 
  -6 -10 -12    0.23    0.25 
  -8  -9   3    0.16    0.15 
  -8  -9   3    0.20    0.14 
  -9  -8   2    0.21    0.22 
  -9  -8   2    0.17    0.16 
  -7 -10   3    0.29    0.18 
  -7 -10   3    0.53    0.16 
  -8  -9   2    0.08    0.10 
  -8  -9   2    0.06    0.15 
  -9  -8   1    0.53    0.25 
  -9  -8   1    0.52    0.20 
 -10  -7   0    0.04    0.21 
 -10  -7   0    0.32    0.19 
  -7 -10   2    0.22    0.14 
  -7 -10   2    0.16    0.17 
  -8  -9   1    0.66    0.21 
  -9  -8   0    0.17    0.17 
 -10  -7  -1    1.24    0.28 
 -10  -7  -1    0.91    0.30 
  -6 -11   2   -0.18    0.11 
  -6 -11   2   -0.16    0.15 
  -7 -10   1    1.06    0.24 
  -7 -10   1    1.08    0.21 
  -8  -9   0    1.76    0.28 
  -9  -8  -1    1.82    0.30 
 -10  -7  -2    0.57    0.24 
 -10  -7  -2    0.43    0.22 
  -6 -11   1    0.08    0.18 
  -6 -11   1   -0.13    0.13 
  -7 -10   0    0.38    0.16 
  -7 -10   0    0.54    0.22 
  -8  -9  -1    4.37    0.42 
  -9  -8  -2    1.57    0.29 
 -10  -7  -3    0.13    0.18 
 -10  -7  -3    0.07    0.18 
  -5 -12   1   -0.10    0.19 
  -5 -12   1    0.11    0.17 
  -6 -11   0   -0.04    0.17 
  -6 -11   0   -0.14    0.12 
  -7 -10  -1    0.90    0.20 
  -7 -10  -1    1.17    0.26 
  -8  -9  -2   -0.01    0.16 
  -9  -8  -3    3.00    0.39 
  -9  -8  -3    2.48    0.35 
 -10  -7  -4   -0.15    0.18 
 -10  -7  -4   -0.02    0.18 
  -5 -12   0    0.07    0.16 
  -5 -12   0    0.17    0.21 
  -6 -11  -1    0.44    0.21 
  -6 -11  -1    0.32    0.16 
  -7 -10  -2    0.68    0.21 
  -7 -10  -2    0.60    0.18 
  -8  -9  -3    1.68    0.29 
  -9  -8  -4    0.45    0.22 
  -9  -8  -4    0.44    0.22 
 -10  -7  -5   -0.03    0.20 
 -10  -7  -5   -0.11    0.17 
  -5 -12  -1    0.29    0.18 
  -5 -12  -1   -0.33    0.18 
  -6 -11  -2    1.34    0.24 
  -6 -11  -2    1.43    0.30 
  -7 -10  -3    1.29    0.27 
  -7 -10  -3    1.36    0.25 
   8   9   4    0.32    0.19 
  -8  -9  -4    0.19    0.19 
   9   8   5   -0.26    0.15 
  -9  -8  -5    0.21    0.21 
  -9  -8  -5   -0.02    0.16 
  10   7   6    0.80    0.26 
 -10  -7  -6    0.96    0.25 
 -10  -7  -6    1.18    0.33 
  -5 -12  -2    0.91    0.28 
  -5 -12  -2    1.00    0.24 
  -6 -11  -3    0.09    0.15 
  -6 -11  -3    0.12    0.19 
   7  10   4   -0.06    0.14 
  -7 -10  -4    0.00    0.12 
  -7 -10  -4   -0.09    0.18 
   8   9   5    0.61    0.20 
  -8  -9  -5    0.56    0.24 
   9   8   6    0.58    0.24 
  -9  -8  -6    0.32    0.24 
  -9  -8  -6    0.79    0.21 
  10   7   7    2.71    0.39 
 -10  -7  -7    2.56    0.42 
 -10  -7  -7    2.33    0.34 
  -4 -13  -2   -0.14    0.16 
  -5 -12  -3    0.07    0.17 
  -5 -12  -3    0.27    0.22 
   6  11   4    1.55    0.31 
  -6 -11  -4    1.29    0.26 
  -6 -11  -4    1.12    0.29 
   7  10   5    1.55    0.27 
  -7 -10  -5    1.42    0.26 
  -7 -10  -5    1.77    0.32 
   8   9   6    0.00    0.16 
  -8  -9  -6    0.02    0.19 
   9   8   7   -0.01    0.17 
  -9  -8  -7    0.08    0.16 
  -9  -8  -7    0.09    0.20 
  10   7   8    1.91    0.37 
 -10  -7  -8    1.61    0.35 
 -10  -7  -8    1.23    0.26 
  -4 -13  -3    0.22    0.20 
  -4 -13  -3    0.34    0.27 
  -5 -12  -4    0.64    0.23 
  -5 -12  -4    1.02    0.31 
   6  11   5    1.45    0.28 
  -6 -11  -5    1.06    0.23
[truncated: 2,616,355 more chars]
